# Supplementary material
Source: publisher figshare collection journal article supplement (https://springernature.figshare.com/ndownloader/files/18090548)
Supplement: Supplementary file 1 [file 18090548]

## Sheet: Contact
First name	Last name	Email	Tel (include all codes)	Institution	Address	Country	Web page
Philip	Dennison	dennison@geog.utah.edu	18015851805	Department of Geography, University of Utah	Department of Geography, Salt Lake City, UT 84112	USA	https://ursa.utah.edu/dennison.php
Mark	Danson	f.m.danson@salford.ac.uk	+00441298815941 // +00441612954038	School of Environment and Life Sciences, University of Salford	Salford M5 4WT	UK	https://www.salford.ac.uk/environment-life-sciences/our-staff/els-academics/mark-danson
Florent	Mouillot	florent.mouillot@ird.fr	+33467613292	IRD	UMR CEFE, 1919 Route de Mende, 34293 Montpellier Cedex 5	France	https://www.cefe.cnrs.fr/fr/recherche/ef/dream/829-c/137-florent-mouillot
Yi	Qi	yi.qi@unl.edu	+1 402-472-8195	University of Nebraska-Lincoln	Hardin Hall (HARH) 315 Lincoln NE 68583-0973	USA	https://directory.unl.edu/people/yqi7
Matt	Jolly	mjolly@fs.fed.us	1-406-329-4848	Rocky Mountain Research Station, Fire Sciences Laboratory,USFS	5775 Hwy 10 W Missoula, MT 59808	USA	https://www.fs.fed.us/research/people/profile.php?alias=mjolly
Dar	Roberts	daroberts@ucsb.edu		Department of Geography, University of California, Santa Barbara	California, USA	USA	https://geog.ucsb.edu/people-faculty/
Glenn	Newnham	glenn.newnham@csiro.au	+61 3 9545 2234	CSIRO	Research Way, Clayton South, VIC 3169, Australia	Australia	https://people.csiro.au/N/G/Glenn-Newnham
Marta	Yebra	marta.yebra@anu.edu.au		Fenner School of Environment and Society, Australian National University	Acton ACT 2601 Australia	Australia	https://fennerschool.anu.edu.au/research/researchers/dr-marta-yebra
Emilio	Chuvieco	emilio.chuvieco@uah.es	34918854438	Department of Geography, University of Alcala	Alcala de Henares, Madrid.	Spain	https://geogra.uah.es/joomla/index.php/personal/14-profesores/111-chuvieco2
Momadou	Sow	momadou@yahoo.fr	+221-77-152-56-60	Institut des Sciences de l’Environnement (ISE), Faculté des Sciences et Techniques	Université Cheikh Anta Diop de Dakar, B.P. 5005 Dakar-Fann, Sénégal	Senegal
Tineke	Kraaij	Tineke.Kraaij@mandela.ac.za	+27 044 801 5018	Nelson Mandela University	George Campus	Republic of South Africa	https://georgecampus.mandela.ac.za/Our-Academic-staff
Greg	Forsyth	GForsyth@csir.co.za		Council for Scientific and Industrial Research (CSIR)	Stellenbosch	Republic of South Africa
Xingwen	Quan	xingwen.quan@uestc.edu.cn	+86 28 61830210	School of Resources and Environment, University of Electronic Science and Technology of China	Chengdu, Sichuan 611731, China	China
Maria Pilar	Martin	mpilar.martin@cchs.csic.es	(+34) 916022393	OPIS-Instituto de Economía, Geografía y Demografía-Departamento de Economía y Geografía Aplicadas	Calle de Albasanz, 26, 28037 Madrid, Spain	Spain	http://iegd.csic.es/en/personal/mpilar.martin
Grazia	Pellizzaro	G.Pellizzaro@ibimet.cnr.it	+39 0792841509	Istituto di Biometeorologia (Sassari) Consiglio Nazionale delle Ricerche (CNR-IBIMET)	Traversa La crucca 3, 07100 Sassari	Italy
Víctor	Resco de Dios	v.rescodedios@gmail.com	34684142657	Universitat de Lleida	Av Rovira Roure 191, 25198 Lleida, Spain	Spain
Rachael H.	Nolan	Rachael.Nolan@WesternSydney.edu.au	61245701267	Hawkesbury Institute for the Environment, Western Sydney University	Locked Bag 1797, Penrith, NSW 2751 Australia	Australia	https://www.westernsydney.edu.au/hie/people/postdoctoral_fellows/doctor_rachael_nolan
María Eugenia	Beget	mebeget@gmail.com	005411-3754-8447	INTA, Instituto de Clima y Agua	Nicolás Repetto y Las Cabañas, Hurlingham 1686, Buenos Aires	Argentina	https://inta.gob.ar/personas/beget.maria

## Sheet: LFMC data
ID	Contact	Sitename	State/Region	Country	Latitude	Longitude	Sampling time	Sampling date	Sampling year	Protocol	Land Cover	LFMC value	Units	NDVI SD min	NDVI SD max	NDVI CV min	NDVI CV max	Species collected	Elevation(m.a.s.l)	Slope(%)	Reference	Name of picture file
C1_1_1	Beget	ArgBA1	Buenos Aires	Argentina	-35.2674	-57.6143	12:05:00	2009-04-06	2009	16	Mosaic natural vegetation (tree, shrub, herbaceous cover) (>50%) / cropland (<50%)	210.09	1	0.0364167	0.078207	0.0695124	0.120313	Unknown grass			Yebra, M.,Beget, M.E., Oricchio, P., Di Bella, C., 2010. InversiÃ³n de modelos de simulaciÃ³n de la reflectividad para la estimaciÃ³n del estado hÃ­drico del combustible vivo en matorrales y pastizales de la Argentina. Serie GeogrÃ¡fica, 16:51-59	Beget-ArgBA1_0, Beget-ArgBA1_1, Beget-ArgBA1_2
C1_1_2	Beget	ArgBA1	Buenos Aires	Argentina	-35.2674	-57.6143	12:48:00	2009-12-17	2009	16	Mosaic natural vegetation (tree, shrub, herbaceous cover) (>50%) / cropland (<50%)	272.215	1	0.0364167	0.078207	0.0695124	0.120313	Unknown grass			Yebra, M.,Beget, M.E., Oricchio, P., Di Bella, C., 2010. InversiÃ³n de modelos de simulaciÃ³n de la reflectividad para la estimaciÃ³n del estado hÃ­drico del combustible vivo en matorrales y pastizales de la Argentina. Serie GeogrÃ¡fica, 16:51-59	Beget-ArgBA1_0, Beget-ArgBA1_1, Beget-ArgBA1_2
C1_1_3	Beget	ArgBA1	Buenos Aires	Argentina	-35.2674	-57.6143	11:15:00	2010-03-08	2010	16	Mosaic natural vegetation (tree, shrub, herbaceous cover) (>50%) / cropland (<50%)	217.395	1	0.0364167	0.078207	0.0695124	0.120313	Unknown grass			Yebra, M.,Beget, M.E., Oricchio, P., Di Bella, C., 2010. InversiÃ³n de modelos de simulaciÃ³n de la reflectividad para la estimaciÃ³n del estado hÃ­drico del combustible vivo en matorrales y pastizales de la Argentina. Serie GeogrÃ¡fica, 16:51-59	Beget-ArgBA1_0, Beget-ArgBA1_1, Beget-ArgBA1_2
C1_1_4	Beget	ArgBA1	Buenos Aires	Argentina	-35.2674	-57.6143	11:30:00	2010-04-23	2010	16	Mosaic natural vegetation (tree, shrub, herbaceous cover) (>50%) / cropland (<50%)	144.065	1	0.0364167	0.078207	0.0695124	0.120313	Unknown grass			Yebra, M.,Beget, M.E., Oricchio, P., Di Bella, C., 2010. InversiÃ³n de modelos de simulaciÃ³n de la reflectividad para la estimaciÃ³n del estado hÃ­drico del combustible vivo en matorrales y pastizales de la Argentina. Serie GeogrÃ¡fica, 16:51-59	Beget-ArgBA1_0, Beget-ArgBA1_1, Beget-ArgBA1_2
C1_2_1	Beget	ArgBA2	Buenos Aires	Argentina	-35.3378	-57.4554	12:30:00	2009-04-06	2009	16	Cropland, rainfed	195.323	1	0.0219402	0.0533237	0.0457027	0.108416	Unknown grass			Yebra, M.,Beget, M.E., Oricchio, P., Di Bella, C., 2010. InversiÃ³n de modelos de simulaciÃ³n de la reflectividad para la estimaciÃ³n del estado hÃ­drico del combustible vivo en matorrales y pastizales de la Argentina. Serie GeogrÃ¡fica, 16:51-59	Beget-ArgBA2_0, Beget-ArgBA2_1, Beget-ArgBA2_2
C1_2_2	Beget	ArgBA2	Buenos Aires	Argentina	-35.3378	-57.4554	13:30:00	2009-12-17	2009	16	Cropland, rainfed	162.773	1	0.0219402	0.0533237	0.0457027	0.108416	Unknown grass			Yebra, M.,Beget, M.E., Oricchio, P., Di Bella, C., 2010. InversiÃ³n de modelos de simulaciÃ³n de la reflectividad para la estimaciÃ³n del estado hÃ­drico del combustible vivo en matorrales y pastizales de la Argentina. Serie GeogrÃ¡fica, 16:51-59	Beget-ArgBA2_0, Beget-ArgBA2_1, Beget-ArgBA2_2
C1_2_3	Beget	ArgBA2	Buenos Aires	Argentina	-35.3378	-57.4554	11:35:00	2010-03-08	2010	16	Cropland, rainfed	167.207	1	0.0219402	0.0533237	0.0457027	0.108416	Unknown grass			Yebra, M.,Beget, M.E., Oricchio, P., Di Bella, C., 2010. InversiÃ³n de modelos de simulaciÃ³n de la reflectividad para la estimaciÃ³n del estado hÃ­drico del combustible vivo en matorrales y pastizales de la Argentina. Serie GeogrÃ¡fica, 16:51-59	Beget-ArgBA2_0, Beget-ArgBA2_1, Beget-ArgBA2_2
C1_2_4	Beget	ArgBA2	Buenos Aires	Argentina	-35.3378	-57.4554	12:15:00	2010-04-23	2010	16	Cropland, rainfed	87.8367	1	0.0219402	0.0533237	0.0457027	0.108416	Unknown grass			Yebra, M.,Beget, M.E., Oricchio, P., Di Bella, C., 2010. InversiÃ³n de modelos de simulaciÃ³n de la reflectividad para la estimaciÃ³n del estado hÃ­drico del combustible vivo en matorrales y pastizales de la Argentina. Serie GeogrÃ¡fica, 16:51-59	Beget-ArgBA2_0, Beget-ArgBA2_1, Beget-ArgBA2_2
C1_3_1	Beget	ArgBA3	Buenos Aires	Argentina	-35.3552	-57.4127	12:50:00	2009-04-06	2009	16	Cropland, rainfed	167.813	1	0.0388614	0.0977199	0.085317	0.168821	Unknown grass			Yebra, M.,Beget, M.E., Oricchio, P., Di Bella, C., 2010. InversiÃ³n de modelos de simulaciÃ³n de la reflectividad para la estimaciÃ³n del estado hÃ­drico del combustible vivo en matorrales y pastizales de la Argentina. Serie GeogrÃ¡fica, 16:51-59	Beget-ArgBA3_0, Beget-ArgBA3_1, Beget-ArgBA3_2
C1_3_2	Beget	ArgBA3	Buenos Aires	Argentina	-35.3552	-57.4127	14:30:00	2009-12-17	2009	16	Cropland, rainfed	183.845	1	0.0388614	0.0977199	0.085317	0.168821	Unknown grass			Yebra, M.,Beget, M.E., Oricchio, P., Di Bella, C., 2010. InversiÃ³n de modelos de simulaciÃ³n de la reflectividad para la estimaciÃ³n del estado hÃ­drico del combustible vivo en matorrales y pastizales de la Argentina. Serie GeogrÃ¡fica, 16:51-59	Beget-ArgBA3_0, Beget-ArgBA3_1, Beget-ArgBA3_2
C1_3_3	Beget	ArgBA3	Buenos Aires	Argentina	-35.3552	-57.4127	12:10:00	2010-03-08	2010	16	Cropland, rainfed	184.647	1	0.0388614	0.0977199	0.085317	0.168821	Unknown grass			Yebra, M.,Beget, M.E., Oricchio, P., Di Bella, C., 2010. InversiÃ³n de modelos de simulaciÃ³n de la reflectividad para la estimaciÃ³n del estado hÃ­drico del combustible vivo en matorrales y pastizales de la Argentina. Serie GeogrÃ¡fica, 16:51-59	Beget-ArgBA3_0, Beget-ArgBA3_1, Beget-ArgBA3_2
C1_3_4	Beget	ArgBA3	Buenos Aires	Argentina	-35.3552	-57.4127	12:50:00	2010-04-23	2010	16	Cropland, rainfed	102.147	1	0.0388614	0.0977199	0.085317	0.168821	Unknown grass			Yebra, M.,Beget, M.E., Oricchio, P., Di Bella, C., 2010. InversiÃ³n de modelos de simulaciÃ³n de la reflectividad para la estimaciÃ³n del estado hÃ­drico del combustible vivo en matorrales y pastizales de la Argentina. Serie GeogrÃ¡fica, 16:51-59	Beget-ArgBA3_0, Beget-ArgBA3_1, Beget-ArgBA3_2
C1_4_1	Beget	ArgBA4	Buenos Aires	Argentina	-35.4369	-57.344	13:20:00	2009-04-06	2009	16	Grassland	231.565	1	0.0378354	0.101201	0.0685517	0.182815	Unknown grass			Yebra, M.,Beget, M.E., Oricchio, P., Di Bella, C., 2010. InversiÃ³n de modelos de simulaciÃ³n de la reflectividad para la estimaciÃ³n del estado hÃ­drico del combustible vivo en matorrales y pastizales de la Argentina. Serie GeogrÃ¡fica, 16:51-59	Beget-ArgBA4_0, Beget-ArgBA4_1, Beget-ArgBA4_2
C1_4_2	Beget	ArgBA4	Buenos Aires	Argentina	-35.4369	-57.344	15:05:00	2009-12-17	2009	16	Grassland	128.425	1	0.0378354	0.101201	0.0685517	0.182815	Unknown grass			Yebra, M.,Beget, M.E., Oricchio, P., Di Bella, C., 2010. InversiÃ³n de modelos de simulaciÃ³n de la reflectividad para la estimaciÃ³n del estado hÃ­drico del combustible vivo en matorrales y pastizales de la Argentina. Serie GeogrÃ¡fica, 16:51-59	Beget-ArgBA4_0, Beget-ArgBA4_1, Beget-ArgBA4_2
C1_4_3	Beget	ArgBA4	Buenos Aires	Argentina	-35.4369	-57.344	12:45:00	2010-03-08	2010	16	Grassland	126.73	1	0.0378354	0.101201	0.0685517	0.182815	Unknown grass			Yebra, M.,Beget, M.E., Oricchio, P., Di Bella, C., 2010. InversiÃ³n de modelos de simulaciÃ³n de la reflectividad para la estimaciÃ³n del estado hÃ­drico del combustible vivo en matorrales y pastizales de la Argentina. Serie GeogrÃ¡fica, 16:51-59	Beget-ArgBA4_0, Beget-ArgBA4_1, Beget-ArgBA4_2
C1_4_4	Beget	ArgBA4	Buenos Aires	Argentina	-35.4369	-57.344	14:22:00	2010-04-23	2010	16	Grassland	81.285	1	0.0378354	0.101201	0.0685517	0.182815	Unknown grass			Yebra, M.,Beget, M.E., Oricchio, P., Di Bella, C., 2010. InversiÃ³n de modelos de simulaciÃ³n de la reflectividad para la estimaciÃ³n del estado hÃ­drico del combustible vivo en matorrales y pastizales de la Argentina. Serie GeogrÃ¡fica, 16:51-59	Beget-ArgBA4_0, Beget-ArgBA4_1, Beget-ArgBA4_2
C1_5_1	Beget	ArgBA5	Buenos Aires	Argentina	-35.4567	-57.3326	13:40:00	2009-04-06	2009	16	Grassland	226.14	1	0.038507	0.0613082	0.057445	0.117987	Unknown grass			Yebra, M.,Beget, M.E., Oricchio, P., Di Bella, C., 2010. InversiÃ³n de modelos de simulaciÃ³n de la reflectividad para la estimaciÃ³n del estado hÃ­drico del combustible vivo en matorrales y pastizales de la Argentina. Serie GeogrÃ¡fica, 16:51-59	Beget-ArgBA5_0, Beget-ArgBA5_1, Beget-ArgBA5_2
C1_5_2	Beget	ArgBA5	Buenos Aires	Argentina	-35.4567	-57.3326	15:30:00	2009-12-17	2009	16	Grassland	144.485	1	0.038507	0.0613082	0.057445	0.117987	Unknown grass			Yebra, M.,Beget, M.E., Oricchio, P., Di Bella, C., 2010. InversiÃ³n de modelos de simulaciÃ³n de la reflectividad para la estimaciÃ³n del estado hÃ­drico del combustible vivo en matorrales y pastizales de la Argentina. Serie GeogrÃ¡fica, 16:51-59	Beget-ArgBA5_0, Beget-ArgBA5_1, Beget-ArgBA5_2
C1_5_3	Beget	ArgBA5	Buenos Aires	Argentina	-35.4567	-57.3326	13:15:00	2010-03-08	2010	16	Grassland	183.145	1	0.038507	0.0613082	0.057445	0.117987	Unknown grass			Yebra, M.,Beget, M.E., Oricchio, P., Di Bella, C., 2010. InversiÃ³n de modelos de simulaciÃ³n de la reflectividad para la estimaciÃ³n del estado hÃ­drico del combustible vivo en matorrales y pastizales de la Argentina. Serie GeogrÃ¡fica, 16:51-59	Beget-ArgBA5_0, Beget-ArgBA5_1, Beget-ArgBA5_2
C1_5_4	Beget	ArgBA5	Buenos Aires	Argentina	-35.4567	-57.3326	13:52:00	2010-04-23	2010	16	Grassland	101.05	1	0.038507	0.0613082	0.057445	0.117987	Unknown grass			Yebra, M.,Beget, M.E., Oricchio, P., Di Bella, C., 2010. InversiÃ³n de modelos de simulaciÃ³n de la reflectividad para la estimaciÃ³n del estado hÃ­drico del combustible vivo en matorrales y pastizales de la Argentina. Serie GeogrÃ¡fica, 16:51-59	Beget-ArgBA5_0, Beget-ArgBA5_1, Beget-ArgBA5_2
C1_6_1	Beget	ArgLP1	La Pampa	Argentina	-36.3313	-66.1552	10:30:00	2008-11-18	2008	16	Shrubland	80.85	1	0.0199049	0.063789	0.0772961	0.161666	Cassia aphylla			Yebra, M.,Beget, M.E., Oricchio, P., Di Bella, C., 2010. InversiÃ³n de modelos de simulaciÃ³n de la reflectividad para la estimaciÃ³n del estado hÃ­drico del combustible vivo en matorrales y pastizales de la Argentina. Serie GeogrÃ¡fica, 16:51-59	Beget-ArgLP1_0, Beget-ArgLP1_1
C1_6_2	Beget	ArgLP1	La Pampa	Argentina	-36.3313	-66.1552	10:30:00	2008-11-18	2008	16	Shrubland	61.03	1	0.0199049	0.063789	0.0772961	0.161666	Chuquiraga erinacea			Yebra, M.,Beget, M.E., Oricchio, P., Di Bella, C., 2010. InversiÃ³n de modelos de simulaciÃ³n de la reflectividad para la estimaciÃ³n del estado hÃ­drico del combustible vivo en matorrales y pastizales de la Argentina. Serie GeogrÃ¡fica, 16:51-59	Beget-ArgLP1_0, Beget-ArgLP1_1
C1_6_3	Beget	ArgLP1	La Pampa	Argentina	-36.3313	-66.1552	10:30:00	2008-11-18	2008	16	Shrubland	86.25	1	0.0199049	0.063789	0.0772961	0.161666	Larrea spp			Yebra, M.,Beget, M.E., Oricchio, P., Di Bella, C., 2010. InversiÃ³n de modelos de simulaciÃ³n de la reflectividad para la estimaciÃ³n del estado hÃ­drico del combustible vivo en matorrales y pastizales de la Argentina. Serie GeogrÃ¡fica, 16:51-59	Beget-ArgLP1_0, Beget-ArgLP1_1
C1_6_4	Beget	ArgLP1	La Pampa	Argentina	-36.3313	-66.1552	10:30:00	2008-11-18	2008	16	Shrubland	115.61	1	0.0199049	0.063789	0.0772961	0.161666	Unknown grass			Yebra, M.,Beget, M.E., Oricchio, P., Di Bella, C., 2010. InversiÃ³n de modelos de simulaciÃ³n de la reflectividad para la estimaciÃ³n del estado hÃ­drico del combustible vivo en matorrales y pastizales de la Argentina. Serie GeogrÃ¡fica, 16:51-59	Beget-ArgLP1_0, Beget-ArgLP1_1
C1_6_5	Beget	ArgLP1	La Pampa	Argentina	-36.3313	-66.1552	18:10:00	2009-02-11	2009	16	Shrubland	39.26	1	0.0199049	0.063789	0.0772961	0.161666	Chuquiraga erinacea			Yebra, M.,Beget, M.E., Oricchio, P., Di Bella, C., 2010. InversiÃ³n de modelos de simulaciÃ³n de la reflectividad para la estimaciÃ³n del estado hÃ­drico del combustible vivo en matorrales y pastizales de la Argentina. Serie GeogrÃ¡fica, 16:51-59	Beget-ArgLP1_0, Beget-ArgLP1_1
C1_6_6	Beget	ArgLP1	La Pampa	Argentina	-36.3313	-66.1552	18:10:00	2009-02-11	2009	16	Shrubland	106.92	1	0.0199049	0.063789	0.0772961	0.161666	Larrea cuneifolia			Yebra, M.,Beget, M.E., Oricchio, P., Di Bella, C., 2010. InversiÃ³n de modelos de simulaciÃ³n de la reflectividad para la estimaciÃ³n del estado hÃ­drico del combustible vivo en matorrales y pastizales de la Argentina. Serie GeogrÃ¡fica, 16:51-59	Beget-ArgLP1_0, Beget-ArgLP1_1
C1_6_7	Beget	ArgLP1	La Pampa	Argentina	-36.3313	-66.1552	18:10:00	2009-02-11	2009	16	Shrubland	68.49	1	0.0199049	0.063789	0.0772961	0.161666	Monthea aphylla			Yebra, M.,Beget, M.E., Oricchio, P., Di Bella, C., 2010. InversiÃ³n de modelos de simulaciÃ³n de la reflectividad para la estimaciÃ³n del estado hÃ­drico del combustible vivo en matorrales y pastizales de la Argentina. Serie GeogrÃ¡fica, 16:51-59	Beget-ArgLP1_0, Beget-ArgLP1_1
C1_6_8	Beget	ArgLP1	La Pampa	Argentina	-36.3313	-66.1552	18:10:00	2009-02-11	2009	16	Shrubland	79.39	1	0.0199049	0.063789	0.0772961	0.161666	Unknown grass			Yebra, M.,Beget, M.E., Oricchio, P., Di Bella, C., 2010. InversiÃ³n de modelos de simulaciÃ³n de la reflectividad para la estimaciÃ³n del estado hÃ­drico del combustible vivo en matorrales y pastizales de la Argentina. Serie GeogrÃ¡fica, 16:51-59	Beget-ArgLP1_0, Beget-ArgLP1_1
C1_6_9	Beget	ArgLP1	La Pampa	Argentina	-36.3313	-66.1552	09:30:00	2009-03-17	2009	16	Shrubland	49.12	1	0.0199049	0.063789	0.0772961	0.161666	Chuquiraga erinacea			Yebra, M.,Beget, M.E., Oricchio, P., Di Bella, C., 2010. InversiÃ³n de modelos de simulaciÃ³n de la reflectividad para la estimaciÃ³n del estado hÃ­drico del combustible vivo en matorrales y pastizales de la Argentina. Serie GeogrÃ¡fica, 16:51-59	Beget-ArgLP1_0, Beget-ArgLP1_1
C1_6_10	Beget	ArgLP1	La Pampa	Argentina	-36.3313	-66.1552	09:30:00	2009-03-17	2009	16	Shrubland	89.31	1	0.0199049	0.063789	0.0772961	0.161666	Larrea cuneifolia			Yebra, M.,Beget, M.E., Oricchio, P., Di Bella, C., 2010. InversiÃ³n de modelos de simulaciÃ³n de la reflectividad para la estimaciÃ³n del estado hÃ­drico del combustible vivo en matorrales y pastizales de la Argentina. Serie GeogrÃ¡fica, 16:51-59	Beget-ArgLP1_0, Beget-ArgLP1_1
C1_6_11	Beget	ArgLP1	La Pampa	Argentina	-36.3313	-66.1552	09:30:00	2009-03-17	2009	16	Shrubland	91.99	1	0.0199049	0.063789	0.0772961	0.161666	Monthea aphylla			Yebra, M.,Beget, M.E., Oricchio, P., Di Bella, C., 2010. InversiÃ³n de modelos de simulaciÃ³n de la reflectividad para la estimaciÃ³n del estado hÃ­drico del combustible vivo en matorrales y pastizales de la Argentina. Serie GeogrÃ¡fica, 16:51-59	Beget-ArgLP1_0, Beget-ArgLP1_1
C1_6_12	Beget	ArgLP1	La Pampa	Argentina	-36.3313	-66.1552	09:30:00	2009-03-17	2009	16	Shrubland	78.7	1	0.0199049	0.063789	0.0772961	0.161666	Unknown grass			Yebra, M.,Beget, M.E., Oricchio, P., Di Bella, C., 2010. InversiÃ³n de modelos de simulaciÃ³n de la reflectividad para la estimaciÃ³n del estado hÃ­drico del combustible vivo en matorrales y pastizales de la Argentina. Serie GeogrÃ¡fica, 16:51-59	Beget-ArgLP1_0, Beget-ArgLP1_1
C1_6_13	Beget	ArgLP1	La Pampa	Argentina	-36.3313	-66.1552	10:30:00	2009-11-15	2009	16	Shrubland	50.74	1	0.0199049	0.063789	0.0772961	0.161666	Cassia aphylla			Yebra, M.,Beget, M.E., Oricchio, P., Di Bella, C., 2010. InversiÃ³n de modelos de simulaciÃ³n de la reflectividad para la estimaciÃ³n del estado hÃ­drico del combustible vivo en matorrales y pastizales de la Argentina. Serie GeogrÃ¡fica, 16:51-59	Beget-ArgLP1_0, Beget-ArgLP1_1
C1_6_14	Beget	ArgLP1	La Pampa	Argentina	-36.3313	-66.1552	10:30:00	2009-11-15	2009	16	Shrubland	59.66	1	0.0199049	0.063789	0.0772961	0.161666	Chuquiraga erinacea			Yebra, M.,Beget, M.E., Oricchio, P., Di Bella, C., 2010. InversiÃ³n de modelos de simulaciÃ³n de la reflectividad para la estimaciÃ³n del estado hÃ­drico del combustible vivo en matorrales y pastizales de la Argentina. Serie GeogrÃ¡fica, 16:51-59	Beget-ArgLP1_0, Beget-ArgLP1_1
C1_6_15	Beget	ArgLP1	La Pampa	Argentina	-36.3313	-66.1552	10:30:00	2009-11-15	2009	16	Shrubland	65.15	1	0.0199049	0.063789	0.0772961	0.161666	Larrea cuneifolia			Yebra, M.,Beget, M.E., Oricchio, P., Di Bella, C., 2010. InversiÃ³n de modelos de simulaciÃ³n de la reflectividad para la estimaciÃ³n del estado hÃ­drico del combustible vivo en matorrales y pastizales de la Argentina. Serie GeogrÃ¡fica, 16:51-59	Beget-ArgLP1_0, Beget-ArgLP1_1
C1_6_16	Beget	ArgLP1	La Pampa	Argentina	-36.3313	-66.1552	10:30:00	2009-11-15	2009	16	Shrubland	41.795	1	0.0199049	0.063789	0.0772961	0.161666	Unknown grass			Yebra, M.,Beget, M.E., Oricchio, P., Di Bella, C., 2010. InversiÃ³n de modelos de simulaciÃ³n de la reflectividad para la estimaciÃ³n del estado hÃ­drico del combustible vivo en matorrales y pastizales de la Argentina. Serie GeogrÃ¡fica, 16:51-59	Beget-ArgLP1_0, Beget-ArgLP1_1
C1_6_17	Beget	ArgLP1	La Pampa	Argentina	-36.3313	-66.1552	10:50:00	2010-02-10	2010	16	Shrubland	88.84	1	0.0199049	0.063789	0.0772961	0.161666	Chuquiraga erinacea			Yebra, M.,Beget, M.E., Oricchio, P., Di Bella, C., 2010. InversiÃ³n de modelos de simulaciÃ³n de la reflectividad para la estimaciÃ³n del estado hÃ­drico del combustible vivo en matorrales y pastizales de la Argentina. Serie GeogrÃ¡fica, 16:51-59	Beget-ArgLP1_0, Beget-ArgLP1_1
C1_6_18	Beget	ArgLP1	La Pampa	Argentina	-36.3313	-66.1552	10:50:00	2010-02-10	2010	16	Shrubland	110.54	1	0.0199049	0.063789	0.0772961	0.161666	Larrea cuneifolia			Yebra, M.,Beget, M.E., Oricchio, P., Di Bella, C., 2010. InversiÃ³n de modelos de simulaciÃ³n de la reflectividad para la estimaciÃ³n del estado hÃ­drico del combustible vivo en matorrales y pastizales de la Argentina. Serie GeogrÃ¡fica, 16:51-59	Beget-ArgLP1_0, Beget-ArgLP1_1
C1_6_19	Beget	ArgLP1	La Pampa	Argentina	-36.3313	-66.1552	10:50:00	2010-02-10	2010	16	Shrubland	66.48	1	0.0199049	0.063789	0.0772961	0.161666	Monthea aphylla			Yebra, M.,Beget, M.E., Oricchio, P., Di Bella, C., 2010. InversiÃ³n de modelos de simulaciÃ³n de la reflectividad para la estimaciÃ³n del estado hÃ­drico del combustible vivo en matorrales y pastizales de la Argentina. Serie GeogrÃ¡fica, 16:51-59	Beget-ArgLP1_0, Beget-ArgLP1_1
C1_6_20	Beget	ArgLP1	La Pampa	Argentina	-36.3313	-66.1552	10:50:00	2010-02-10	2010	16	Shrubland	76.39	1	0.0199049	0.063789	0.0772961	0.161666	Unknown grass			Yebra, M.,Beget, M.E., Oricchio, P., Di Bella, C., 2010. InversiÃ³n de modelos de simulaciÃ³n de la reflectividad para la estimaciÃ³n del estado hÃ­drico del combustible vivo en matorrales y pastizales de la Argentina. Serie GeogrÃ¡fica, 16:51-59	Beget-ArgLP1_0, Beget-ArgLP1_1
C1_6_21	Beget	ArgLP1	La Pampa	Argentina	-36.3313	-66.1552	09:45:00	2010-03-15	2010	16	Shrubland	97.19	1	0.0199049	0.063789	0.0772961	0.161666	Cassia aphylla			Yebra, M.,Beget, M.E., Oricchio, P., Di Bella, C., 2010. InversiÃ³n de modelos de simulaciÃ³n de la reflectividad para la estimaciÃ³n del estado hÃ­drico del combustible vivo en matorrales y pastizales de la Argentina. Serie GeogrÃ¡fica, 16:51-59	Beget-ArgLP1_0, Beget-ArgLP1_1
C1_6_22	Beget	ArgLP1	La Pampa	Argentina	-36.3313	-66.1552	09:45:00	2010-03-15	2010	16	Shrubland	120.71	1	0.0199049	0.063789	0.0772961	0.161666	Larrea spp			Yebra, M.,Beget, M.E., Oricchio, P., Di Bella, C., 2010. InversiÃ³n de modelos de simulaciÃ³n de la reflectividad para la estimaciÃ³n del estado hÃ­drico del combustible vivo en matorrales y pastizales de la Argentina. Serie GeogrÃ¡fica, 16:51-59	Beget-ArgLP1_0, Beget-ArgLP1_1
C1_6_23	Beget	ArgLP1	La Pampa	Argentina	-36.3313	-66.1552	09:45:00	2010-03-15	2010	16	Shrubland	160.98	1	0.0199049	0.063789	0.0772961	0.161666	Unknown grass			Yebra, M.,Beget, M.E., Oricchio, P., Di Bella, C., 2010. InversiÃ³n de modelos de simulaciÃ³n de la reflectividad para la estimaciÃ³n del estado hÃ­drico del combustible vivo en matorrales y pastizales de la Argentina. Serie GeogrÃ¡fica, 16:51-59	Beget-ArgLP1_0, Beget-ArgLP1_1
C1_6_24	Beget	ArgLP1	La Pampa	Argentina	-36.3313	-66.1552		2010-05-18	2010	16	Shrubland	68.48	1	0.0199049	0.063789	0.0772961	0.161666	Cassia aphylla			Yebra, M.,Beget, M.E., Oricchio, P., Di Bella, C., 2010. InversiÃ³n de modelos de simulaciÃ³n de la reflectividad para la estimaciÃ³n del estado hÃ­drico del combustible vivo en matorrales y pastizales de la Argentina. Serie GeogrÃ¡fica, 16:51-59	Beget-ArgLP1_0, Beget-ArgLP1_1
C1_6_25	Beget	ArgLP1	La Pampa	Argentina	-36.3313	-66.1552		2010-05-18	2010	16	Shrubland	93.09	1	0.0199049	0.063789	0.0772961	0.161666	Larrea spp			Yebra, M.,Beget, M.E., Oricchio, P., Di Bella, C., 2010. InversiÃ³n de modelos de simulaciÃ³n de la reflectividad para la estimaciÃ³n del estado hÃ­drico del combustible vivo en matorrales y pastizales de la Argentina. Serie GeogrÃ¡fica, 16:51-59	Beget-ArgLP1_0, Beget-ArgLP1_1
C1_6_26	Beget	ArgLP1	La Pampa	Argentina	-36.3313	-66.1552		2010-05-18	2010	16	Shrubland	95.19	1	0.0199049	0.063789	0.0772961	0.161666	Unknown grass			Yebra, M.,Beget, M.E., Oricchio, P., Di Bella, C., 2010. InversiÃ³n de modelos de simulaciÃ³n de la reflectividad para la estimaciÃ³n del estado hÃ­drico del combustible vivo en matorrales y pastizales de la Argentina. Serie GeogrÃ¡fica, 16:51-59	Beget-ArgLP1_0, Beget-ArgLP1_1
C1_7_1	Beget	ArgLP10	La Pampa	Argentina	-37.1634	-67.5601	12:45:00	2008-11-19	2008	16	Shrubland	60.58	1	0.013379	0.0235617	0.0689397	0.132589	Cassia aphylla			Yebra, M.,Beget, M.E., Oricchio, P., Di Bella, C., 2010. InversiÃ³n de modelos de simulaciÃ³n de la reflectividad para la estimaciÃ³n del estado hÃ­drico del combustible vivo en matorrales y pastizales de la Argentina. Serie GeogrÃ¡fica, 16:51-59	Beget-ArgLP10_0
C1_7_2	Beget	ArgLP10	La Pampa	Argentina	-37.1634	-67.5601	12:45:00	2008-11-19	2008	16	Shrubland	66.01	1	0.013379	0.0235617	0.0689397	0.132589	Condalia microphylla			Yebra, M.,Beget, M.E., Oricchio, P., Di Bella, C., 2010. InversiÃ³n de modelos de simulaciÃ³n de la reflectividad para la estimaciÃ³n del estado hÃ­drico del combustible vivo en matorrales y pastizales de la Argentina. Serie GeogrÃ¡fica, 16:51-59	Beget-ArgLP10_0
C1_7_3	Beget	ArgLP10	La Pampa	Argentina	-37.1634	-67.5601	12:45:00	2008-11-19	2008	16	Shrubland	85.06	1	0.013379	0.0235617	0.0689397	0.132589	Larrea spp			Yebra, M.,Beget, M.E., Oricchio, P., Di Bella, C., 2010. InversiÃ³n de modelos de simulaciÃ³n de la reflectividad para la estimaciÃ³n del estado hÃ­drico del combustible vivo en matorrales y pastizales de la Argentina. Serie GeogrÃ¡fica, 16:51-59	Beget-ArgLP10_0
C1_7_4	Beget	ArgLP10	La Pampa	Argentina	-37.1634	-67.5601	11:41:00	2009-02-11	2009	16	Shrubland	49.33	1	0.013379	0.0235617	0.0689397	0.132589	Condalia microphylla			Yebra, M.,Beget, M.E., Oricchio, P., Di Bella, C., 2010. InversiÃ³n de modelos de simulaciÃ³n de la reflectividad para la estimaciÃ³n del estado hÃ­drico del combustible vivo en matorrales y pastizales de la Argentina. Serie GeogrÃ¡fica, 16:51-59	Beget-ArgLP10_0
C1_7_5	Beget	ArgLP10	La Pampa	Argentina	-37.1634	-67.5601	11:41:00	2009-02-11	2009	16	Shrubland	55.34	1	0.013379	0.0235617	0.0689397	0.132589	Larrea cuneifolia			Yebra, M.,Beget, M.E., Oricchio, P., Di Bella, C., 2010. InversiÃ³n de modelos de simulaciÃ³n de la reflectividad para la estimaciÃ³n del estado hÃ­drico del combustible vivo en matorrales y pastizales de la Argentina. Serie GeogrÃ¡fica, 16:51-59	Beget-ArgLP10_0
C1_7_6	Beget	ArgLP10	La Pampa	Argentina	-37.1634	-67.5601	11:41:00	2009-02-11	2009	16	Shrubland	87.88	1	0.013379	0.0235617	0.0689397	0.132589	Monthea aphylla			Yebra, M.,Beget, M.E., Oricchio, P., Di Bella, C., 2010. InversiÃ³n de modelos de simulaciÃ³n de la reflectividad para la estimaciÃ³n del estado hÃ­drico del combustible vivo en matorrales y pastizales de la Argentina. Serie GeogrÃ¡fica, 16:51-59	Beget-ArgLP10_0
C1_7_7	Beget	ArgLP10	La Pampa	Argentina	-37.1634	-67.5601	15:00:00	2009-03-17	2009	16	Shrubland	48.06	1	0.013379	0.0235617	0.0689397	0.132589	Condalia microphylla			Yebra, M.,Beget, M.E., Oricchio, P., Di Bella, C., 2010. InversiÃ³n de modelos de simulaciÃ³n de la reflectividad para la estimaciÃ³n del estado hÃ­drico del combustible vivo en matorrales y pastizales de la Argentina. Serie GeogrÃ¡fica, 16:51-59	Beget-ArgLP10_0
C1_7_8	Beget	ArgLP10	La Pampa	Argentina	-37.1634	-67.5601	15:00:00	2009-03-17	2009	16	Shrubland	53.42	1	0.013379	0.0235617	0.0689397	0.132589	Larrea cuneifolia			Yebra, M.,Beget, M.E., Oricchio, P., Di Bella, C., 2010. InversiÃ³n de modelos de simulaciÃ³n de la reflectividad para la estimaciÃ³n del estado hÃ­drico del combustible vivo en matorrales y pastizales de la Argentina. Serie GeogrÃ¡fica, 16:51-59	Beget-ArgLP10_0
C1_7_9	Beget	ArgLP10	La Pampa	Argentina	-37.1634	-67.5601	15:00:00	2009-03-17	2009	16	Shrubland	63.16	1	0.013379	0.0235617	0.0689397	0.132589	Monthea aphylla			Yebra, M.,Beget, M.E., Oricchio, P., Di Bella, C., 2010. InversiÃ³n de modelos de simulaciÃ³n de la reflectividad para la estimaciÃ³n del estado hÃ­drico del combustible vivo en matorrales y pastizales de la Argentina. Serie GeogrÃ¡fica, 16:51-59	Beget-ArgLP10_0
C1_7_10	Beget	ArgLP10	La Pampa	Argentina	-37.1634	-67.5601	12:46:00	2009-11-29	2009	16	Shrubland	68.69	1	0.013379	0.0235617	0.0689397	0.132589	Cassia aphylla			Yebra, M.,Beget, M.E., Oricchio, P., Di Bella, C., 2010. InversiÃ³n de modelos de simulaciÃ³n de la reflectividad para la estimaciÃ³n del estado hÃ­drico del combustible vivo en matorrales y pastizales de la Argentina. Serie GeogrÃ¡fica, 16:51-59	Beget-ArgLP10_0
C1_7_11	Beget	ArgLP10	La Pampa	Argentina	-37.1634	-67.5601	12:46:00	2009-11-29	2009	16	Shrubland	43.17	1	0.013379	0.0235617	0.0689397	0.132589	Condalia microphylla			Yebra, M.,Beget, M.E., Oricchio, P., Di Bella, C., 2010. InversiÃ³n de modelos de simulaciÃ³n de la reflectividad para la estimaciÃ³n del estado hÃ­drico del combustible vivo en matorrales y pastizales de la Argentina. Serie GeogrÃ¡fica, 16:51-59	Beget-ArgLP10_0
C1_7_12	Beget	ArgLP10	La Pampa	Argentina	-37.1634	-67.5601	12:46:00	2009-11-29	2009	16	Shrubland	64.41	1	0.013379	0.0235617	0.0689397	0.132589	Larrea divaricata			Yebra, M.,Beget, M.E., Oricchio, P., Di Bella, C., 2010. InversiÃ³n de modelos de simulaciÃ³n de la reflectividad para la estimaciÃ³n del estado hÃ­drico del combustible vivo en matorrales y pastizales de la Argentina. Serie GeogrÃ¡fica, 16:51-59	Beget-ArgLP10_0
C1_7_13	Beget	ArgLP10	La Pampa	Argentina	-37.1634	-67.5601	12:46:00	2009-11-29	2009	16	Shrubland	90.99	1	0.013379	0.0235617	0.0689397	0.132589	Prosopis alpataco			Yebra, M.,Beget, M.E., Oricchio, P., Di Bella, C., 2010. InversiÃ³n de modelos de simulaciÃ³n de la reflectividad para la estimaciÃ³n del estado hÃ­drico del combustible vivo en matorrales y pastizales de la Argentina. Serie GeogrÃ¡fica, 16:51-59	Beget-ArgLP10_0
C1_7_14	Beget	ArgLP10	La Pampa	Argentina	-37.1634	-67.5601	17:15:00	2010-03-15	2010	16	Shrubland	63.5	1	0.013379	0.0235617	0.0689397	0.132589	Cassia aphylla			Yebra, M.,Beget, M.E., Oricchio, P., Di Bella, C., 2010. InversiÃ³n de modelos de simulaciÃ³n de la reflectividad para la estimaciÃ³n del estado hÃ­drico del combustible vivo en matorrales y pastizales de la Argentina. Serie GeogrÃ¡fica, 16:51-59	Beget-ArgLP10_0
C1_7_15	Beget	ArgLP10	La Pampa	Argentina	-37.1634	-67.5601	17:15:00	2010-03-15	2010	16	Shrubland	65.38	1	0.013379	0.0235617	0.0689397	0.132589	Condalia microphylla			Yebra, M.,Beget, M.E., Oricchio, P., Di Bella, C., 2010. InversiÃ³n de modelos de simulaciÃ³n de la reflectividad para la estimaciÃ³n del estado hÃ­drico del combustible vivo en matorrales y pastizales de la Argentina. Serie GeogrÃ¡fica, 16:51-59	Beget-ArgLP10_0
C1_7_16	Beget	ArgLP10	La Pampa	Argentina	-37.1634	-67.5601	17:15:00	2010-03-15	2010	16	Shrubland	100.56	1	0.013379	0.0235617	0.0689397	0.132589	Prosopis alpataco			Yebra, M.,Beget, M.E., Oricchio, P., Di Bella, C., 2010. InversiÃ³n de modelos de simulaciÃ³n de la reflectividad para la estimaciÃ³n del estado hÃ­drico del combustible vivo en matorrales y pastizales de la Argentina. Serie GeogrÃ¡fica, 16:51-59	Beget-ArgLP10_0
C1_7_17	Beget	ArgLP10	La Pampa	Argentina	-37.1634	-67.5601		2010-05-18	2010	16	Shrubland	52.85	1	0.013379	0.0235617	0.0689397	0.132589	Cassia aphylla			Yebra, M.,Beget, M.E., Oricchio, P., Di Bella, C., 2010. InversiÃ³n de modelos de simulaciÃ³n de la reflectividad para la estimaciÃ³n del estado hÃ­drico del combustible vivo en matorrales y pastizales de la Argentina. Serie GeogrÃ¡fica, 16:51-59	Beget-ArgLP10_0
C1_7_18	Beget	ArgLP10	La Pampa	Argentina	-37.1634	-67.5601		2010-05-18	2010	16	Shrubland	76.1	1	0.013379	0.0235617	0.0689397	0.132589	Condalia microphylla			Yebra, M.,Beget, M.E., Oricchio, P., Di Bella, C., 2010. InversiÃ³n de modelos de simulaciÃ³n de la reflectividad para la estimaciÃ³n del estado hÃ­drico del combustible vivo en matorrales y pastizales de la Argentina. Serie GeogrÃ¡fica, 16:51-59	Beget-ArgLP10_0
C1_7_19	Beget	ArgLP10	La Pampa	Argentina	-37.1634	-67.5601		2010-05-18	2010	16	Shrubland	55	1	0.013379	0.0235617	0.0689397	0.132589	Larrea divaricata			Yebra, M.,Beget, M.E., Oricchio, P., Di Bella, C., 2010. InversiÃ³n de modelos de simulaciÃ³n de la reflectividad para la estimaciÃ³n del estado hÃ­drico del combustible vivo en matorrales y pastizales de la Argentina. Serie GeogrÃ¡fica, 16:51-59	Beget-ArgLP10_0
C1_8_1	Beget	ArgLP11	La Pampa	Argentina	-37.4882	-67.7106	14:45:00	2008-11-19	2008	16	Shrubland	62.88	1	0.0236775	0.0389986	0.124071	0.192205	Condalia microphylla			Yebra, M.,Beget, M.E., Oricchio, P., Di Bella, C., 2010. InversiÃ³n de modelos de simulaciÃ³n de la reflectividad para la estimaciÃ³n del estado hÃ­drico del combustible vivo en matorrales y pastizales de la Argentina. Serie GeogrÃ¡fica, 16:51-59	Beget-ArgLP11_0
C1_8_2	Beget	ArgLP11	La Pampa	Argentina	-37.4882	-67.7106	14:45:00	2008-11-19	2008	16	Shrubland	72.31	1	0.0236775	0.0389986	0.124071	0.192205	Larrea spp			Yebra, M.,Beget, M.E., Oricchio, P., Di Bella, C., 2010. InversiÃ³n de modelos de simulaciÃ³n de la reflectividad para la estimaciÃ³n del estado hÃ­drico del combustible vivo en matorrales y pastizales de la Argentina. Serie GeogrÃ¡fica, 16:51-59	Beget-ArgLP11_0
C1_8_3	Beget	ArgLP11	La Pampa	Argentina	-37.4882	-67.7106	14:45:00	2008-11-19	2008	16	Shrubland	80.24	1	0.0236775	0.0389986	0.124071	0.192205	Prosopis alpataco			Yebra, M.,Beget, M.E., Oricchio, P., Di Bella, C., 2010. InversiÃ³n de modelos de simulaciÃ³n de la reflectividad para la estimaciÃ³n del estado hÃ­drico del combustible vivo en matorrales y pastizales de la Argentina. Serie GeogrÃ¡fica, 16:51-59	Beget-ArgLP11_0
C1_8_4	Beget	ArgLP11	La Pampa	Argentina	-37.4882	-67.7106	10:37:00	2009-02-11	2009	16	Shrubland	43.89	1	0.0236775	0.0389986	0.124071	0.192205	Condalia microphylla			Yebra, M.,Beget, M.E., Oricchio, P., Di Bella, C., 2010. InversiÃ³n de modelos de simulaciÃ³n de la reflectividad para la estimaciÃ³n del estado hÃ­drico del combustible vivo en matorrales y pastizales de la Argentina. Serie GeogrÃ¡fica, 16:51-59	Beget-ArgLP11_0
C1_8_5	Beget	ArgLP11	La Pampa	Argentina	-37.4882	-67.7106	10:37:00	2009-02-11	2009	16	Shrubland	48.11	1	0.0236775	0.0389986	0.124071	0.192205	Larrea cuneifolia			Yebra, M.,Beget, M.E., Oricchio, P., Di Bella, C., 2010. InversiÃ³n de modelos de simulaciÃ³n de la reflectividad para la estimaciÃ³n del estado hÃ­drico del combustible vivo en matorrales y pastizales de la Argentina. Serie GeogrÃ¡fica, 16:51-59	Beget-ArgLP11_0
C1_8_6	Beget	ArgLP11	La Pampa	Argentina	-37.4882	-67.7106	10:37:00	2009-02-11	2009	16	Shrubland	66.3	1	0.0236775	0.0389986	0.124071	0.192205	Prosopis alpataco			Yebra, M.,Beget, M.E., Oricchio, P., Di Bella, C., 2010. InversiÃ³n de modelos de simulaciÃ³n de la reflectividad para la estimaciÃ³n del estado hÃ­drico del combustible vivo en matorrales y pastizales de la Argentina. Serie GeogrÃ¡fica, 16:51-59	Beget-ArgLP11_0
C1_8_7	Beget	ArgLP11	La Pampa	Argentina	-37.4882	-67.7106	15:34:00	2009-03-17	2009	16	Shrubland	48.42	1	0.0236775	0.0389986	0.124071	0.192205	Condalia microphylla			Yebra, M.,Beget, M.E., Oricchio, P., Di Bella, C., 2010. InversiÃ³n de modelos de simulaciÃ³n de la reflectividad para la estimaciÃ³n del estado hÃ­drico del combustible vivo en matorrales y pastizales de la Argentina. Serie GeogrÃ¡fica, 16:51-59	Beget-ArgLP11_0
C1_8_8	Beget	ArgLP11	La Pampa	Argentina	-37.4882	-67.7106	15:34:00	2009-03-17	2009	16	Shrubland	60.07	1	0.0236775	0.0389986	0.124071	0.192205	Larrea cuneifolia			Yebra, M.,Beget, M.E., Oricchio, P., Di Bella, C., 2010. InversiÃ³n de modelos de simulaciÃ³n de la reflectividad para la estimaciÃ³n del estado hÃ­drico del combustible vivo en matorrales y pastizales de la Argentina. Serie GeogrÃ¡fica, 16:51-59	Beget-ArgLP11_0
C1_8_9	Beget	ArgLP11	La Pampa	Argentina	-37.4882	-67.7106	15:34:00	2009-03-17	2009	16	Shrubland	46.85	1	0.0236775	0.0389986	0.124071	0.192205	Prosopis alpataco			Yebra, M.,Beget, M.E., Oricchio, P., Di Bella, C., 2010. InversiÃ³n de modelos de simulaciÃ³n de la reflectividad para la estimaciÃ³n del estado hÃ­drico del combustible vivo en matorrales y pastizales de la Argentina. Serie GeogrÃ¡fica, 16:51-59	Beget-ArgLP11_0
C1_8_10	Beget	ArgLP11	La Pampa	Argentina	-37.4882	-67.7106	11:00:00	2009-11-29	2009	16	Shrubland	38.9	1	0.0236775	0.0389986	0.124071	0.192205	Condalia microphylla			Yebra, M.,Beget, M.E., Oricchio, P., Di Bella, C., 2010. InversiÃ³n de modelos de simulaciÃ³n de la reflectividad para la estimaciÃ³n del estado hÃ­drico del combustible vivo en matorrales y pastizales de la Argentina. Serie GeogrÃ¡fica, 16:51-59	Beget-ArgLP11_0
C1_8_11	Beget	ArgLP11	La Pampa	Argentina	-37.4882	-67.7106	11:00:00	2009-11-29	2009	16	Shrubland	47.74	1	0.0236775	0.0389986	0.124071	0.192205	Larrea cuneifolia			Yebra, M.,Beget, M.E., Oricchio, P., Di Bella, C., 2010. InversiÃ³n de modelos de simulaciÃ³n de la reflectividad para la estimaciÃ³n del estado hÃ­drico del combustible vivo en matorrales y pastizales de la Argentina. Serie GeogrÃ¡fica, 16:51-59	Beget-ArgLP11_0
C1_8_12	Beget	ArgLP11	La Pampa	Argentina	-37.4882	-67.7106	11:00:00	2009-11-29	2009	16	Shrubland	67.12	1	0.0236775	0.0389986	0.124071	0.192205	Prosopis alpataco			Yebra, M.,Beget, M.E., Oricchio, P., Di Bella, C., 2010. InversiÃ³n de modelos de simulaciÃ³n de la reflectividad para la estimaciÃ³n del estado hÃ­drico del combustible vivo en matorrales y pastizales de la Argentina. Serie GeogrÃ¡fica, 16:51-59	Beget-ArgLP11_0
C1_8_13	Beget	ArgLP11	La Pampa	Argentina	-37.4882	-67.7106	18:00:00	2010-03-15	2010	16	Shrubland	89.63	1	0.0236775	0.0389986	0.124071	0.192205	Condalia microphylla			Yebra, M.,Beget, M.E., Oricchio, P., Di Bella, C., 2010. InversiÃ³n de modelos de simulaciÃ³n de la reflectividad para la estimaciÃ³n del estado hÃ­drico del combustible vivo en matorrales y pastizales de la Argentina. Serie GeogrÃ¡fica, 16:51-59	Beget-ArgLP11_0
C1_8_14	Beget	ArgLP11	La Pampa	Argentina	-37.4882	-67.7106	18:00:00	2010-03-15	2010	16	Shrubland	90.73	1	0.0236775	0.0389986	0.124071	0.192205	Larrea cuneifolia			Yebra, M.,Beget, M.E., Oricchio, P., Di Bella, C., 2010. InversiÃ³n de modelos de simulaciÃ³n de la reflectividad para la estimaciÃ³n del estado hÃ­drico del combustible vivo en matorrales y pastizales de la Argentina. Serie GeogrÃ¡fica, 16:51-59	Beget-ArgLP11_0
C1_8_15	Beget	ArgLP11	La Pampa	Argentina	-37.4882	-67.7106		2010-05-18	2010	16	Shrubland	54.68	1	0.0236775	0.0389986	0.124071	0.192205	Condalia microphylla			Yebra, M.,Beget, M.E., Oricchio, P., Di Bella, C., 2010. InversiÃ³n de modelos de simulaciÃ³n de la reflectividad para la estimaciÃ³n del estado hÃ­drico del combustible vivo en matorrales y pastizales de la Argentina. Serie GeogrÃ¡fica, 16:51-59	Beget-ArgLP11_0
C1_8_16	Beget	ArgLP11	La Pampa	Argentina	-37.4882	-67.7106		2010-05-18	2010	16	Shrubland	54.92	1	0.0236775	0.0389986	0.124071	0.192205	Larrea cuneifolia			Yebra, M.,Beget, M.E., Oricchio, P., Di Bella, C., 2010. InversiÃ³n de modelos de simulaciÃ³n de la reflectividad para la estimaciÃ³n del estado hÃ­drico del combustible vivo en matorrales y pastizales de la Argentina. Serie GeogrÃ¡fica, 16:51-59	Beget-ArgLP11_0
C1_9_1	Beget	ArgLP12	La Pampa	Argentina	-36.2592	-67.2623	13:10:00	2009-03-17	2009	16	Shrubland	55.65	1	0.0171567	0.0368137	0.0979699	0.168498	Larrea cuneifolia			Yebra, M.,Beget, M.E., Oricchio, P., Di Bella, C., 2010. InversiÃ³n de modelos de simulaciÃ³n de la reflectividad para la estimaciÃ³n del estado hÃ­drico del combustible vivo en matorrales y pastizales de la Argentina. Serie GeogrÃ¡fica, 16:51-59
C1_9_2	Beget	ArgLP12	La Pampa	Argentina	-36.2592	-67.2623	13:10:00	2009-03-17	2009	16	Shrubland	74.97	1	0.0171567	0.0368137	0.0979699	0.168498	Prosopis alpataco			Yebra, M.,Beget, M.E., Oricchio, P., Di Bella, C., 2010. InversiÃ³n de modelos de simulaciÃ³n de la reflectividad para la estimaciÃ³n del estado hÃ­drico del combustible vivo en matorrales y pastizales de la Argentina. Serie GeogrÃ¡fica, 16:51-59
C1_10_1	Beget	ArgLP2	La Pampa	Argentina	-36.3337	-66.2472	11:44:00	2008-11-18	2008	16	Shrubland	101.815	1	0.0166056	0.0448534	0.0697168	0.223628	Unknown grass			Yebra, M.,Beget, M.E., Oricchio, P., Di Bella, C., 2010. InversiÃ³n de modelos de simulaciÃ³n de la reflectividad para la estimaciÃ³n del estado hÃ­drico del combustible vivo en matorrales y pastizales de la Argentina. Serie GeogrÃ¡fica, 16:51-59	Beget-ArgLP2_0
C1_10_2	Beget	ArgLP2	La Pampa	Argentina	-36.3337	-66.2472	17:40:00	2009-02-11	2009	16	Shrubland	59.27	1	0.0166056	0.0448534	0.0697168	0.223628	Unknown grass			Yebra, M.,Beget, M.E., Oricchio, P., Di Bella, C., 2010. InversiÃ³n de modelos de simulaciÃ³n de la reflectividad para la estimaciÃ³n del estado hÃ­drico del combustible vivo en matorrales y pastizales de la Argentina. Serie GeogrÃ¡fica, 16:51-59	Beget-ArgLP2_0
C1_10_3	Beget	ArgLP2	La Pampa	Argentina	-36.3337	-66.2472	10:00:00	2009-03-17	2009	16	Shrubland	75.545	1	0.0166056	0.0448534	0.0697168	0.223628	Unknown grass			Yebra, M.,Beget, M.E., Oricchio, P., Di Bella, C., 2010. InversiÃ³n de modelos de simulaciÃ³n de la reflectividad para la estimaciÃ³n del estado hÃ­drico del combustible vivo en matorrales y pastizales de la Argentina. Serie GeogrÃ¡fica, 16:51-59	Beget-ArgLP2_0
C1_10_4	Beget	ArgLP2	La Pampa	Argentina	-36.3337	-66.2472	12:55:00	2009-11-15	2009	16	Shrubland	51.595	1	0.0166056	0.0448534	0.0697168	0.223628	Unknown grass			Yebra, M.,Beget, M.E., Oricchio, P., Di Bella, C., 2010. InversiÃ³n de modelos de simulaciÃ³n de la reflectividad para la estimaciÃ³n del estado hÃ­drico del combustible vivo en matorrales y pastizales de la Argentina. Serie GeogrÃ¡fica, 16:51-59	Beget-ArgLP2_0
C1_10_5	Beget	ArgLP2	La Pampa	Argentina	-36.3337	-66.2472	11:30:00	2010-02-10	2010	16	Shrubland	150.805	1	0.0166056	0.0448534	0.0697168	0.223628	Unknown grass			Yebra, M.,Beget, M.E., Oricchio, P., Di Bella, C., 2010. InversiÃ³n de modelos de simulaciÃ³n de la reflectividad para la estimaciÃ³n del estado hÃ­drico del combustible vivo en matorrales y pastizales de la Argentina. Serie GeogrÃ¡fica, 16:51-59	Beget-ArgLP2_0
C1_10_6	Beget	ArgLP2	La Pampa	Argentina	-36.3337	-66.2472	10:30:00	2010-03-15	2010	16	Shrubland	115.44	1	0.0166056	0.0448534	0.0697168	0.223628	Unknown grass			Yebra, M.,Beget, M.E., Oricchio, P., Di Bella, C., 2010. InversiÃ³n de modelos de simulaciÃ³n de la reflectividad para la estimaciÃ³n del estado hÃ­drico del combustible vivo en matorrales y pastizales de la Argentina. Serie GeogrÃ¡fica, 16:51-59	Beget-ArgLP2_0
C1_10_7	Beget	ArgLP2	La Pampa	Argentina	-36.3337	-66.2472		2010-05-18	2010	16	Shrubland	90.355	1	0.0166056	0.0448534	0.0697168	0.223628	Unknown grass			Yebra, M.,Beget, M.E., Oricchio, P., Di Bella, C., 2010. InversiÃ³n de modelos de simulaciÃ³n de la reflectividad para la estimaciÃ³n del estado hÃ­drico del combustible vivo en matorrales y pastizales de la Argentina. Serie GeogrÃ¡fica, 16:51-59	Beget-ArgLP2_0
C1_11_1	Beget	ArgLP3	La Pampa	Argentina	-36.3355	-66.3497	12:20:00	2008-11-18	2008	16	Shrubland	85.0267	1	0.0127292	0.0482544	0.0535217	0.102408	Unknown grass			Yebra, M.,Beget, M.E., Oricchio, P., Di Bella, C., 2010. InversiÃ³n de modelos de simulaciÃ³n de la reflectividad para la estimaciÃ³n del estado hÃ­drico del combustible vivo en matorrales y pastizales de la Argentina. Serie GeogrÃ¡fica, 16:51-59	Beget-ArgLP3_0
C1_11_2	Beget	ArgLP3	La Pampa	Argentina	-36.3355	-66.3497	17:05:00	2009-02-11	2009	16	Shrubland	53.83	1	0.0127292	0.0482544	0.0535217	0.102408	Junellia seriphioides			Yebra, M.,Beget, M.E., Oricchio, P., Di Bella, C., 2010. InversiÃ³n de modelos de simulaciÃ³n de la reflectividad para la estimaciÃ³n del estado hÃ­drico del combustible vivo en matorrales y pastizales de la Argentina. Serie GeogrÃ¡fica, 16:51-59	Beget-ArgLP3_0
C1_11_3	Beget	ArgLP3	La Pampa	Argentina	-36.3355	-66.3497	17:05:00	2009-02-11	2009	16	Shrubland	86.435	1	0.0127292	0.0482544	0.0535217	0.102408	Unknown grass			Yebra, M.,Beget, M.E., Oricchio, P., Di Bella, C., 2010. InversiÃ³n de modelos de simulaciÃ³n de la reflectividad para la estimaciÃ³n del estado hÃ­drico del combustible vivo en matorrales y pastizales de la Argentina. Serie GeogrÃ¡fica, 16:51-59	Beget-ArgLP3_0
C1_11_4	Beget	ArgLP3	La Pampa	Argentina	-36.3355	-66.3497	10:20:00	2009-03-17	2009	16	Shrubland	185.295	1	0.0127292	0.0482544	0.0535217	0.102408	Unknown grass			Yebra, M.,Beget, M.E., Oricchio, P., Di Bella, C., 2010. InversiÃ³n de modelos de simulaciÃ³n de la reflectividad para la estimaciÃ³n del estado hÃ­drico del combustible vivo en matorrales y pastizales de la Argentina. Serie GeogrÃ¡fica, 16:51-59	Beget-ArgLP3_0
C1_11_5	Beget	ArgLP3	La Pampa	Argentina	-36.3355	-66.3497	14:15:00	2009-11-15	2009	16	Shrubland	39.12	1	0.0127292	0.0482544	0.0535217	0.102408	Junellia seriphioides			Yebra, M.,Beget, M.E., Oricchio, P., Di Bella, C., 2010. InversiÃ³n de modelos de simulaciÃ³n de la reflectividad para la estimaciÃ³n del estado hÃ­drico del combustible vivo en matorrales y pastizales de la Argentina. Serie GeogrÃ¡fica, 16:51-59	Beget-ArgLP3_0
C1_11_6	Beget	ArgLP3	La Pampa	Argentina	-36.3355	-66.3497	14:15:00	2009-11-15	2009	16	Shrubland	76.5	1	0.0127292	0.0482544	0.0535217	0.102408	Unknown grass			Yebra, M.,Beget, M.E., Oricchio, P., Di Bella, C., 2010. InversiÃ³n de modelos de simulaciÃ³n de la reflectividad para la estimaciÃ³n del estado hÃ­drico del combustible vivo en matorrales y pastizales de la Argentina. Serie GeogrÃ¡fica, 16:51-59	Beget-ArgLP3_0
C1_11_7	Beget	ArgLP3	La Pampa	Argentina	-36.3355	-66.3497	11:50:00	2010-02-10	2010	16	Shrubland	97.73	1	0.0127292	0.0482544	0.0535217	0.102408	Junellia seriphioides			Yebra, M.,Beget, M.E., Oricchio, P., Di Bella, C., 2010. InversiÃ³n de modelos de simulaciÃ³n de la reflectividad para la estimaciÃ³n del estado hÃ­drico del combustible vivo en matorrales y pastizales de la Argentina. Serie GeogrÃ¡fica, 16:51-59	Beget-ArgLP3_0
C1_11_8	Beget	ArgLP3	La Pampa	Argentina	-36.3355	-66.3497	11:50:00	2010-02-10	2010	16	Shrubland	107.2	1	0.0127292	0.0482544	0.0535217	0.102408	Unknown grass			Yebra, M.,Beget, M.E., Oricchio, P., Di Bella, C., 2010. InversiÃ³n de modelos de simulaciÃ³n de la reflectividad para la estimaciÃ³n del estado hÃ­drico del combustible vivo en matorrales y pastizales de la Argentina. Serie GeogrÃ¡fica, 16:51-59	Beget-ArgLP3_0
C1_11_9	Beget	ArgLP3	La Pampa	Argentina	-36.3355	-66.3497	11:45:00	2010-03-15	2010	16	Shrubland	147.48	1	0.0127292	0.0482544	0.0535217	0.102408	Junellia seriphioides			Yebra, M.,Beget, M.E., Oricchio, P., Di Bella, C., 2010. InversiÃ³n de modelos de simulaciÃ³n de la reflectividad para la estimaciÃ³n del estado hÃ­drico del combustible vivo en matorrales y pastizales de la Argentina. Serie GeogrÃ¡fica, 16:51-59	Beget-ArgLP3_0
C1_11_10	Beget	ArgLP3	La Pampa	Argentina	-36.3355	-66.3497	11:45:00	2010-03-15	2010	16	Shrubland	196.925	1	0.0127292	0.0482544	0.0535217	0.102408	Unknown grass			Yebra, M.,Beget, M.E., Oricchio, P., Di Bella, C., 2010. InversiÃ³n de modelos de simulaciÃ³n de la reflectividad para la estimaciÃ³n del estado hÃ­drico del combustible vivo en matorrales y pastizales de la Argentina. Serie GeogrÃ¡fica, 16:51-59	Beget-ArgLP3_0
C1_11_11	Beget	ArgLP3	La Pampa	Argentina	-36.3355	-66.3497		2010-05-18	2010	16	Shrubland	81.34	1	0.0127292	0.0482544	0.0535217	0.102408	Junellia seriphioides			Yebra, M.,Beget, M.E., Oricchio, P., Di Bella, C., 2010. InversiÃ³n de modelos de simulaciÃ³n de la reflectividad para la estimaciÃ³n del estado hÃ­drico del combustible vivo en matorrales y pastizales de la Argentina. Serie GeogrÃ¡fica, 16:51-59	Beget-ArgLP3_0
C1_11_12	Beget	ArgLP3	La Pampa	Argentina	-36.3355	-66.3497		2010-05-18	2010	16	Shrubland	102.215	1	0.0127292	0.0482544	0.0535217	0.102408	Unknown grass			Yebra, M.,Beget, M.E., Oricchio, P., Di Bella, C., 2010. InversiÃ³n de modelos de simulaciÃ³n de la reflectividad para la estimaciÃ³n del estado hÃ­drico del combustible vivo en matorrales y pastizales de la Argentina. Serie GeogrÃ¡fica, 16:51-59	Beget-ArgLP3_0
C1_12_1	Beget	ArgLP4	La Pampa	Argentina	-36.3189	-66.6403	13:00:00	2008-11-18	2008	16	Shrubland	102.745	1	0.015784	0.0496247	0.0509041	0.13809	Unknown grass			Yebra, M.,Beget, M.E., Oricchio, P., Di Bella, C., 2010. InversiÃ³n de modelos de simulaciÃ³n de la reflectividad para la estimaciÃ³n del estado hÃ­drico del combustible vivo en matorrales y pastizales de la Argentina. Serie GeogrÃ¡fica, 16:51-59	Beget-ArgLP4_0
C1_12_2	Beget	ArgLP4	La Pampa	Argentina	-36.3189	-66.6403	16:30:00	2009-02-11	2009	16	Shrubland	57.065	1	0.015784	0.0496247	0.0509041	0.13809	Unknown grass			Yebra, M.,Beget, M.E., Oricchio, P., Di Bella, C., 2010. InversiÃ³n de modelos de simulaciÃ³n de la reflectividad para la estimaciÃ³n del estado hÃ­drico del combustible vivo en matorrales y pastizales de la Argentina. Serie GeogrÃ¡fica, 16:51-59	Beget-ArgLP4_0
C1_12_3	Beget	ArgLP4	La Pampa	Argentina	-36.3189	-66.6403	10:50:00	2009-03-17	2009	16	Shrubland	76.035	1	0.015784	0.0496247	0.0509041	0.13809	Unknown grass			Yebra, M.,Beget, M.E., Oricchio, P., Di Bella, C., 2010. InversiÃ³n de modelos de simulaciÃ³n de la reflectividad para la estimaciÃ³n del estado hÃ­drico del combustible vivo en matorrales y pastizales de la Argentina. Serie GeogrÃ¡fica, 16:51-59	Beget-ArgLP4_0
C1_12_4	Beget	ArgLP4	La Pampa	Argentina	-36.3189	-66.6403	16:00:00	2009-11-15	2009	16	Shrubland	35.65	1	0.015784	0.0496247	0.0509041	0.13809	Unknown grass			Yebra, M.,Beget, M.E., Oricchio, P., Di Bella, C., 2010. InversiÃ³n de modelos de simulaciÃ³n de la reflectividad para la estimaciÃ³n del estado hÃ­drico del combustible vivo en matorrales y pastizales de la Argentina. Serie GeogrÃ¡fica, 16:51-59	Beget-ArgLP4_0
C1_12_5	Beget	ArgLP4	La Pampa	Argentina	-36.3189	-66.6403	12:25:00	2010-02-10	2010	16	Shrubland	107.435	1	0.015784	0.0496247	0.0509041	0.13809	Unknown grass			Yebra, M.,Beget, M.E., Oricchio, P., Di Bella, C., 2010. InversiÃ³n de modelos de simulaciÃ³n de la reflectividad para la estimaciÃ³n del estado hÃ­drico del combustible vivo en matorrales y pastizales de la Argentina. Serie GeogrÃ¡fica, 16:51-59	Beget-ArgLP4_0
C1_12_6	Beget	ArgLP4	La Pampa	Argentina	-36.3189	-66.6403	12:30:00	2010-03-15	2010	16	Shrubland	124.325	1	0.015784	0.0496247	0.0509041	0.13809	Unknown grass			Yebra, M.,Beget, M.E., Oricchio, P., Di Bella, C., 2010. InversiÃ³n de modelos de simulaciÃ³n de la reflectividad para la estimaciÃ³n del estado hÃ­drico del combustible vivo en matorrales y pastizales de la Argentina. Serie GeogrÃ¡fica, 16:51-59	Beget-ArgLP4_0
C1_12_7	Beget	ArgLP4	La Pampa	Argentina	-36.3189	-66.6403		2010-05-18	2010	16	Shrubland	63.66	1	0.015784	0.0496247	0.0509041	0.13809	Unknown grass			Yebra, M.,Beget, M.E., Oricchio, P., Di Bella, C., 2010. InversiÃ³n de modelos de simulaciÃ³n de la reflectividad para la estimaciÃ³n del estado hÃ­drico del combustible vivo en matorrales y pastizales de la Argentina. Serie GeogrÃ¡fica, 16:51-59	Beget-ArgLP4_0
C1_13_1	Beget	ArgLP5	La Pampa	Argentina	-36.2593	-67.1617	15:30:00	2008-11-18	2008	16	Shrubland	62.59	1	0.027694	0.0522795	0.104548	0.145559	Condalia microphylla			Yebra, M.,Beget, M.E., Oricchio, P., Di Bella, C., 2010. InversiÃ³n de modelos de simulaciÃ³n de la reflectividad para la estimaciÃ³n del estado hÃ­drico del combustible vivo en matorrales y pastizales de la Argentina. Serie GeogrÃ¡fica, 16:51-59	Beget-ArgLP5_0, Beget-ArgLP5_1, Beget-ArgLP5_2Prosopis
C1_13_2	Beget	ArgLP5	La Pampa	Argentina	-36.2593	-67.1617	15:30:00	2008-11-18	2008	16	Shrubland	102.91	1	0.027694	0.0522795	0.104548	0.145559	Prosopis alpataco			Yebra, M.,Beget, M.E., Oricchio, P., Di Bella, C., 2010. InversiÃ³n de modelos de simulaciÃ³n de la reflectividad para la estimaciÃ³n del estado hÃ­drico del combustible vivo en matorrales y pastizales de la Argentina. Serie GeogrÃ¡fica, 16:51-59	Beget-ArgLP5_0, Beget-ArgLP5_1, Beget-ArgLP5_2Prosopis
C1_13_3	Beget	ArgLP5	La Pampa	Argentina	-36.2593	-67.1617	15:30:00	2008-11-18	2008	16	Shrubland	162.76	1	0.027694	0.0522795	0.104548	0.145559	Unknown shrub			Yebra, M.,Beget, M.E., Oricchio, P., Di Bella, C., 2010. InversiÃ³n de modelos de simulaciÃ³n de la reflectividad para la estimaciÃ³n del estado hÃ­drico del combustible vivo en matorrales y pastizales de la Argentina. Serie GeogrÃ¡fica, 16:51-59	Beget-ArgLP5_0, Beget-ArgLP5_1, Beget-ArgLP5_2Prosopis
C1_13_4	Beget	ArgLP5	La Pampa	Argentina	-36.2593	-67.1617	14:15:00	2009-02-11	2009	16	Shrubland	53.49	1	0.027694	0.0522795	0.104548	0.145559	Condalia microphylla			Yebra, M.,Beget, M.E., Oricchio, P., Di Bella, C., 2010. InversiÃ³n de modelos de simulaciÃ³n de la reflectividad para la estimaciÃ³n del estado hÃ­drico del combustible vivo en matorrales y pastizales de la Argentina. Serie GeogrÃ¡fica, 16:51-59	Beget-ArgLP5_0, Beget-ArgLP5_1, Beget-ArgLP5_2Prosopis
C1_13_5	Beget	ArgLP5	La Pampa	Argentina	-36.2593	-67.1617	14:15:00	2009-02-11	2009	16	Shrubland	145.53	1	0.027694	0.0522795	0.104548	0.145559	Lycium sp.			Yebra, M.,Beget, M.E., Oricchio, P., Di Bella, C., 2010. InversiÃ³n de modelos de simulaciÃ³n de la reflectividad para la estimaciÃ³n del estado hÃ­drico del combustible vivo en matorrales y pastizales de la Argentina. Serie GeogrÃ¡fica, 16:51-59	Beget-ArgLP5_0, Beget-ArgLP5_1, Beget-ArgLP5_2Prosopis
C1_13_6	Beget	ArgLP5	La Pampa	Argentina	-36.2593	-67.1617	14:15:00	2009-02-11	2009	16	Shrubland	23.56	1	0.027694	0.0522795	0.104548	0.145559	Prosopis alpataco			Yebra, M.,Beget, M.E., Oricchio, P., Di Bella, C., 2010. InversiÃ³n de modelos de simulaciÃ³n de la reflectividad para la estimaciÃ³n del estado hÃ­drico del combustible vivo en matorrales y pastizales de la Argentina. Serie GeogrÃ¡fica, 16:51-59	Beget-ArgLP5_0, Beget-ArgLP5_1, Beget-ArgLP5_2Prosopis
C1_13_7	Beget	ArgLP5	La Pampa	Argentina	-36.2593	-67.1617	12:35:00	2009-03-17	2009	16	Shrubland	54.5	1	0.027694	0.0522795	0.104548	0.145559	Condalia microphylla			Yebra, M.,Beget, M.E., Oricchio, P., Di Bella, C., 2010. InversiÃ³n de modelos de simulaciÃ³n de la reflectividad para la estimaciÃ³n del estado hÃ­drico del combustible vivo en matorrales y pastizales de la Argentina. Serie GeogrÃ¡fica, 16:51-59	Beget-ArgLP5_0, Beget-ArgLP5_1, Beget-ArgLP5_2Prosopis
C1_13_8	Beget	ArgLP5	La Pampa	Argentina	-36.2593	-67.1617	12:35:00	2009-03-17	2009	16	Shrubland	254.1	1	0.027694	0.0522795	0.104548	0.145559	Lycium sp.			Yebra, M.,Beget, M.E., Oricchio, P., Di Bella, C., 2010. InversiÃ³n de modelos de simulaciÃ³n de la reflectividad para la estimaciÃ³n del estado hÃ­drico del combustible vivo en matorrales y pastizales de la Argentina. Serie GeogrÃ¡fica, 16:51-59	Beget-ArgLP5_0, Beget-ArgLP5_1, Beget-ArgLP5_2Prosopis
C1_13_9	Beget	ArgLP5	La Pampa	Argentina	-36.2593	-67.1617	12:35:00	2009-03-17	2009	16	Shrubland	27.14	1	0.027694	0.0522795	0.104548	0.145559	Prosopis alpataco			Yebra, M.,Beget, M.E., Oricchio, P., Di Bella, C., 2010. InversiÃ³n de modelos de simulaciÃ³n de la reflectividad para la estimaciÃ³n del estado hÃ­drico del combustible vivo en matorrales y pastizales de la Argentina. Serie GeogrÃ¡fica, 16:51-59	Beget-ArgLP5_0, Beget-ArgLP5_1, Beget-ArgLP5_2Prosopis
C1_13_10	Beget	ArgLP5	La Pampa	Argentina	-36.2593	-67.1617	17:10:00	2009-11-29	2009	16	Shrubland	42.74	1	0.027694	0.0522795	0.104548	0.145559	Condalia microphylla			Yebra, M.,Beget, M.E., Oricchio, P., Di Bella, C., 2010. InversiÃ³n de modelos de simulaciÃ³n de la reflectividad para la estimaciÃ³n del estado hÃ­drico del combustible vivo en matorrales y pastizales de la Argentina. Serie GeogrÃ¡fica, 16:51-59	Beget-ArgLP5_0, Beget-ArgLP5_1, Beget-ArgLP5_2Prosopis
C1_13_11	Beget	ArgLP5	La Pampa	Argentina	-36.2593	-67.1617	17:10:00	2009-11-29	2009	16	Shrubland	95.91	1	0.027694	0.0522795	0.104548	0.145559	Lycium sp.			Yebra, M.,Beget, M.E., Oricchio, P., Di Bella, C., 2010. InversiÃ³n de modelos de simulaciÃ³n de la reflectividad para la estimaciÃ³n del estado hÃ­drico del combustible vivo en matorrales y pastizales de la Argentina. Serie GeogrÃ¡fica, 16:51-59	Beget-ArgLP5_0, Beget-ArgLP5_1, Beget-ArgLP5_2Prosopis
C1_13_12	Beget	ArgLP5	La Pampa	Argentina	-36.2593	-67.1617	17:10:00	2009-11-29	2009	16	Shrubland	107.03	1	0.027694	0.0522795	0.104548	0.145559	Prosopis flexuosa			Yebra, M.,Beget, M.E., Oricchio, P., Di Bella, C., 2010. InversiÃ³n de modelos de simulaciÃ³n de la reflectividad para la estimaciÃ³n del estado hÃ­drico del combustible vivo en matorrales y pastizales de la Argentina. Serie GeogrÃ¡fica, 16:51-59	Beget-ArgLP5_0, Beget-ArgLP5_1, Beget-ArgLP5_2Prosopis
C1_13_13	Beget	ArgLP5	La Pampa	Argentina	-36.2593	-67.1617	13:45:00	2010-03-15	2010	16	Shrubland	59.17	1	0.027694	0.0522795	0.104548	0.145559	Condalia microphylla			Yebra, M.,Beget, M.E., Oricchio, P., Di Bella, C., 2010. InversiÃ³n de modelos de simulaciÃ³n de la reflectividad para la estimaciÃ³n del estado hÃ­drico del combustible vivo en matorrales y pastizales de la Argentina. Serie GeogrÃ¡fica, 16:51-59	Beget-ArgLP5_0, Beget-ArgLP5_1, Beget-ArgLP5_2Prosopis
C1_13_14	Beget	ArgLP5	La Pampa	Argentina	-36.2593	-67.1617	13:45:00	2010-03-15	2010	16	Shrubland	213.41	1	0.027694	0.0522795	0.104548	0.145559	Lycium sp.			Yebra, M.,Beget, M.E., Oricchio, P., Di Bella, C., 2010. InversiÃ³n de modelos de simulaciÃ³n de la reflectividad para la estimaciÃ³n del estado hÃ­drico del combustible vivo en matorrales y pastizales de la Argentina. Serie GeogrÃ¡fica, 16:51-59	Beget-ArgLP5_0, Beget-ArgLP5_1, Beget-ArgLP5_2Prosopis
C1_13_15	Beget	ArgLP5	La Pampa	Argentina	-36.2593	-67.1617	13:45:00	2010-03-15	2010	16	Shrubland	95.09	1	0.027694	0.0522795	0.104548	0.145559	Prosopis flexuosa			Yebra, M.,Beget, M.E., Oricchio, P., Di Bella, C., 2010. InversiÃ³n de modelos de simulaciÃ³n de la reflectividad para la estimaciÃ³n del estado hÃ­drico del combustible vivo en matorrales y pastizales de la Argentina. Serie GeogrÃ¡fica, 16:51-59	Beget-ArgLP5_0, Beget-ArgLP5_1, Beget-ArgLP5_2Prosopis
C1_13_16	Beget	ArgLP5	La Pampa	Argentina	-36.2593	-67.1617		2010-05-18	2010	16	Shrubland	64.7	1	0.027694	0.0522795	0.104548	0.145559	Condalia microphylla			Yebra, M.,Beget, M.E., Oricchio, P., Di Bella, C., 2010. InversiÃ³n de modelos de simulaciÃ³n de la reflectividad para la estimaciÃ³n del estado hÃ­drico del combustible vivo en matorrales y pastizales de la Argentina. Serie GeogrÃ¡fica, 16:51-59	Beget-ArgLP5_0, Beget-ArgLP5_1, Beget-ArgLP5_2Prosopis
C1_13_17	Beget	ArgLP5	La Pampa	Argentina	-36.2593	-67.1617		2010-05-18	2010	16	Shrubland	116.05	1	0.027694	0.0522795	0.104548	0.145559	Lycium sp.			Yebra, M.,Beget, M.E., Oricchio, P., Di Bella, C., 2010. InversiÃ³n de modelos de simulaciÃ³n de la reflectividad para la estimaciÃ³n del estado hÃ­drico del combustible vivo en matorrales y pastizales de la Argentina. Serie GeogrÃ¡fica, 16:51-59	Beget-ArgLP5_0, Beget-ArgLP5_1, Beget-ArgLP5_2Prosopis
C1_13_18	Beget	ArgLP5	La Pampa	Argentina	-36.2593	-67.1617		2010-05-18	2010	16	Shrubland	68.75	1	0.027694	0.0522795	0.104548	0.145559	Prosopis flexuosa			Yebra, M.,Beget, M.E., Oricchio, P., Di Bella, C., 2010. InversiÃ³n de modelos de simulaciÃ³n de la reflectividad para la estimaciÃ³n del estado hÃ­drico del combustible vivo en matorrales y pastizales de la Argentina. Serie GeogrÃ¡fica, 16:51-59	Beget-ArgLP5_0, Beget-ArgLP5_1, Beget-ArgLP5_2Prosopis
C1_14_1	Beget	ArgLP6	La Pampa	Argentina	-36.2591	-67.2317	16:00:00	2008-11-18	2008	16	Shrubland	64.77	1	0.0221433	0.04617	0.11913	0.156376	Larrea spp			Yebra, M.,Beget, M.E., Oricchio, P., Di Bella, C., 2010. InversiÃ³n de modelos de simulaciÃ³n de la reflectividad para la estimaciÃ³n del estado hÃ­drico del combustible vivo en matorrales y pastizales de la Argentina. Serie GeogrÃ¡fica, 16:51-59	Beget-ArgLP6_0, Beget-ArgLP6_1
C1_14_2	Beget	ArgLP6	La Pampa	Argentina	-36.2591	-67.2317	16:00:00	2008-11-18	2008	16	Shrubland	102.91	1	0.0221433	0.04617	0.11913	0.156376	Prosopis alpataco			Yebra, M.,Beget, M.E., Oricchio, P., Di Bella, C., 2010. InversiÃ³n de modelos de simulaciÃ³n de la reflectividad para la estimaciÃ³n del estado hÃ­drico del combustible vivo en matorrales y pastizales de la Argentina. Serie GeogrÃ¡fica, 16:51-59	Beget-ArgLP6_0, Beget-ArgLP6_1
C1_14_3	Beget	ArgLP6	La Pampa	Argentina	-36.2591	-67.2317	14:40:00	2009-02-11	2009	16	Shrubland	47.47	1	0.0221433	0.04617	0.11913	0.156376	Larrea cuneifolia			Yebra, M.,Beget, M.E., Oricchio, P., Di Bella, C., 2010. InversiÃ³n de modelos de simulaciÃ³n de la reflectividad para la estimaciÃ³n del estado hÃ­drico del combustible vivo en matorrales y pastizales de la Argentina. Serie GeogrÃ¡fica, 16:51-59	Beget-ArgLP6_0, Beget-ArgLP6_1
C1_14_4	Beget	ArgLP6	La Pampa	Argentina	-36.2591	-67.2317	14:40:00	2009-02-11	2009	16	Shrubland	23.56	1	0.0221433	0.04617	0.11913	0.156376	Prosopis alpataco			Yebra, M.,Beget, M.E., Oricchio, P., Di Bella, C., 2010. InversiÃ³n de modelos de simulaciÃ³n de la reflectividad para la estimaciÃ³n del estado hÃ­drico del combustible vivo en matorrales y pastizales de la Argentina. Serie GeogrÃ¡fica, 16:51-59	Beget-ArgLP6_0, Beget-ArgLP6_1
C1_14_5	Beget	ArgLP6	La Pampa	Argentina	-36.2591	-67.2317	12:53:00	2009-03-17	2009	16	Shrubland	68.24	1	0.0221433	0.04617	0.11913	0.156376	Larrea cuneifolia			Yebra, M.,Beget, M.E., Oricchio, P., Di Bella, C., 2010. InversiÃ³n de modelos de simulaciÃ³n de la reflectividad para la estimaciÃ³n del estado hÃ­drico del combustible vivo en matorrales y pastizales de la Argentina. Serie GeogrÃ¡fica, 16:51-59	Beget-ArgLP6_0, Beget-ArgLP6_1
C1_14_6	Beget	ArgLP6	La Pampa	Argentina	-36.2591	-67.2317	12:53:00	2009-03-17	2009	16	Shrubland	27.14	1	0.0221433	0.04617	0.11913	0.156376	Prosopis alpataco			Yebra, M.,Beget, M.E., Oricchio, P., Di Bella, C., 2010. InversiÃ³n de modelos de simulaciÃ³n de la reflectividad para la estimaciÃ³n del estado hÃ­drico del combustible vivo en matorrales y pastizales de la Argentina. Serie GeogrÃ¡fica, 16:51-59	Beget-ArgLP6_0, Beget-ArgLP6_1
C1_14_7	Beget	ArgLP6	La Pampa	Argentina	-36.2591	-67.2317	16:45:00	2009-11-29	2009	16	Shrubland	85.91	1	0.0221433	0.04617	0.11913	0.156376	Larrea divaricata			Yebra, M.,Beget, M.E., Oricchio, P., Di Bella, C., 2010. InversiÃ³n de modelos de simulaciÃ³n de la reflectividad para la estimaciÃ³n del estado hÃ­drico del combustible vivo en matorrales y pastizales de la Argentina. Serie GeogrÃ¡fica, 16:51-59	Beget-ArgLP6_0, Beget-ArgLP6_1
C1_14_8	Beget	ArgLP6	La Pampa	Argentina	-36.2591	-67.2317	16:45:00	2009-11-29	2009	16	Shrubland	94.52	1	0.0221433	0.04617	0.11913	0.156376	Prosopis alpataco			Yebra, M.,Beget, M.E., Oricchio, P., Di Bella, C., 2010. InversiÃ³n de modelos de simulaciÃ³n de la reflectividad para la estimaciÃ³n del estado hÃ­drico del combustible vivo en matorrales y pastizales de la Argentina. Serie GeogrÃ¡fica, 16:51-59	Beget-ArgLP6_0, Beget-ArgLP6_1
C1_14_9	Beget	ArgLP6	La Pampa	Argentina	-36.2591	-67.2317	14:15:00	2010-03-15	2010	16	Shrubland	88.02	1	0.0221433	0.04617	0.11913	0.156376	Larrea divaricata			Yebra, M.,Beget, M.E., Oricchio, P., Di Bella, C., 2010. InversiÃ³n de modelos de simulaciÃ³n de la reflectividad para la estimaciÃ³n del estado hÃ­drico del combustible vivo en matorrales y pastizales de la Argentina. Serie GeogrÃ¡fica, 16:51-59	Beget-ArgLP6_0, Beget-ArgLP6_1
C1_14_10	Beget	ArgLP6	La Pampa	Argentina	-36.2591	-67.2317	14:15:00	2010-03-15	2010	16	Shrubland	97.63	1	0.0221433	0.04617	0.11913	0.156376	Prosopis alpataco			Yebra, M.,Beget, M.E., Oricchio, P., Di Bella, C., 2010. InversiÃ³n de modelos de simulaciÃ³n de la reflectividad para la estimaciÃ³n del estado hÃ­drico del combustible vivo en matorrales y pastizales de la Argentina. Serie GeogrÃ¡fica, 16:51-59	Beget-ArgLP6_0, Beget-ArgLP6_1
C1_14_11	Beget	ArgLP6	La Pampa	Argentina	-36.2591	-67.2317		2010-05-18	2010	16	Shrubland	78.25	1	0.0221433	0.04617	0.11913	0.156376	Larrea divaricata			Yebra, M.,Beget, M.E., Oricchio, P., Di Bella, C., 2010. InversiÃ³n de modelos de simulaciÃ³n de la reflectividad para la estimaciÃ³n del estado hÃ­drico del combustible vivo en matorrales y pastizales de la Argentina. Serie GeogrÃ¡fica, 16:51-59	Beget-ArgLP6_0, Beget-ArgLP6_1
C1_14_12	Beget	ArgLP6	La Pampa	Argentina	-36.2591	-67.2317		2010-05-18	2010	16	Shrubland	73.52	1	0.0221433	0.04617	0.11913	0.156376	Prosopis alpataco			Yebra, M.,Beget, M.E., Oricchio, P., Di Bella, C., 2010. InversiÃ³n de modelos de simulaciÃ³n de la reflectividad para la estimaciÃ³n del estado hÃ­drico del combustible vivo en matorrales y pastizales de la Argentina. Serie GeogrÃ¡fica, 16:51-59	Beget-ArgLP6_0, Beget-ArgLP6_1
C1_15_1	Beget	ArgLP7	La Pampa	Argentina	-36.3721	-67.0699	10:00:00	2008-11-19	2008	16	Shrubland	145.1	1	0.0351826	0.0565444	0.151236	0.20059	Unknown shrub			Yebra, M.,Beget, M.E., Oricchio, P., Di Bella, C., 2010. InversiÃ³n de modelos de simulaciÃ³n de la reflectividad para la estimaciÃ³n del estado hÃ­drico del combustible vivo en matorrales y pastizales de la Argentina. Serie GeogrÃ¡fica, 16:51-59	Beget-ArgLP7_0, Beget-ArgLP7_1
C1_15_2	Beget	ArgLP7	La Pampa	Argentina	-36.3721	-67.0699	15:44:00	2009-11-29	2009	16	Shrubland	167.82	1	0.0351826	0.0565444	0.151236	0.20059	Atriplex lampa			Yebra, M.,Beget, M.E., Oricchio, P., Di Bella, C., 2010. InversiÃ³n de modelos de simulaciÃ³n de la reflectividad para la estimaciÃ³n del estado hÃ­drico del combustible vivo en matorrales y pastizales de la Argentina. Serie GeogrÃ¡fica, 16:51-59	Beget-ArgLP7_0, Beget-ArgLP7_1
C1_15_3	Beget	ArgLP7	La Pampa	Argentina	-36.3721	-67.0699	15:44:00	2009-11-29	2009	16	Shrubland	62.27	1	0.0351826	0.0565444	0.151236	0.20059	Cyclolepis genistoides			Yebra, M.,Beget, M.E., Oricchio, P., Di Bella, C., 2010. InversiÃ³n de modelos de simulaciÃ³n de la reflectividad para la estimaciÃ³n del estado hÃ­drico del combustible vivo en matorrales y pastizales de la Argentina. Serie GeogrÃ¡fica, 16:51-59	Beget-ArgLP7_0, Beget-ArgLP7_1
C1_15_4	Beget	ArgLP7	La Pampa	Argentina	-36.3721	-67.0699	15:44:00	2009-11-29	2009	16	Shrubland	109.04	1	0.0351826	0.0565444	0.151236	0.20059	Lycium sp.			Yebra, M.,Beget, M.E., Oricchio, P., Di Bella, C., 2010. InversiÃ³n de modelos de simulaciÃ³n de la reflectividad para la estimaciÃ³n del estado hÃ­drico del combustible vivo en matorrales y pastizales de la Argentina. Serie GeogrÃ¡fica, 16:51-59	Beget-ArgLP7_0, Beget-ArgLP7_1
C1_15_5	Beget	ArgLP7	La Pampa	Argentina	-36.3721	-67.0699	15:20:00	2010-03-15	2010	16	Shrubland	166.32	1	0.0351826	0.0565444	0.151236	0.20059	Atriplex lampa			Yebra, M.,Beget, M.E., Oricchio, P., Di Bella, C., 2010. InversiÃ³n de modelos de simulaciÃ³n de la reflectividad para la estimaciÃ³n del estado hÃ­drico del combustible vivo en matorrales y pastizales de la Argentina. Serie GeogrÃ¡fica, 16:51-59	Beget-ArgLP7_0, Beget-ArgLP7_1
C1_15_6	Beget	ArgLP7	La Pampa	Argentina	-36.3721	-67.0699	15:20:00	2010-03-15	2010	16	Shrubland	170.54	1	0.0351826	0.0565444	0.151236	0.20059	Cyclolepis genistoides			Yebra, M.,Beget, M.E., Oricchio, P., Di Bella, C., 2010. InversiÃ³n de modelos de simulaciÃ³n de la reflectividad para la estimaciÃ³n del estado hÃ­drico del combustible vivo en matorrales y pastizales de la Argentina. Serie GeogrÃ¡fica, 16:51-59	Beget-ArgLP7_0, Beget-ArgLP7_1
C1_15_7	Beget	ArgLP7	La Pampa	Argentina	-36.3721	-67.0699	15:20:00	2010-03-15	2010	16	Shrubland	217.76	1	0.0351826	0.0565444	0.151236	0.20059	Lycium sp.			Yebra, M.,Beget, M.E., Oricchio, P., Di Bella, C., 2010. InversiÃ³n de modelos de simulaciÃ³n de la reflectividad para la estimaciÃ³n del estado hÃ­drico del combustible vivo en matorrales y pastizales de la Argentina. Serie GeogrÃ¡fica, 16:51-59	Beget-ArgLP7_0, Beget-ArgLP7_1
C1_15_8	Beget	ArgLP7	La Pampa	Argentina	-36.3721	-67.0699		2010-05-18	2010	16	Shrubland	105.2	1	0.0351826	0.0565444	0.151236	0.20059	Atriplex lampa			Yebra, M.,Beget, M.E., Oricchio, P., Di Bella, C., 2010. InversiÃ³n de modelos de simulaciÃ³n de la reflectividad para la estimaciÃ³n del estado hÃ­drico del combustible vivo en matorrales y pastizales de la Argentina. Serie GeogrÃ¡fica, 16:51-59	Beget-ArgLP7_0, Beget-ArgLP7_1
C1_15_9	Beget	ArgLP7	La Pampa	Argentina	-36.3721	-67.0699		2010-05-18	2010	16	Shrubland	115.85	1	0.0351826	0.0565444	0.151236	0.20059	Cyclolepis genistoides			Yebra, M.,Beget, M.E., Oricchio, P., Di Bella, C., 2010. InversiÃ³n de modelos de simulaciÃ³n de la reflectividad para la estimaciÃ³n del estado hÃ­drico del combustible vivo en matorrales y pastizales de la Argentina. Serie GeogrÃ¡fica, 16:51-59	Beget-ArgLP7_0, Beget-ArgLP7_1
C1_15_10	Beget	ArgLP7	La Pampa	Argentina	-36.3721	-67.0699		2010-05-18	2010	16	Shrubland	141.96	1	0.0351826	0.0565444	0.151236	0.20059	Lycium sp.			Yebra, M.,Beget, M.E., Oricchio, P., Di Bella, C., 2010. InversiÃ³n de modelos de simulaciÃ³n de la reflectividad para la estimaciÃ³n del estado hÃ­drico del combustible vivo en matorrales y pastizales de la Argentina. Serie GeogrÃ¡fica, 16:51-59	Beget-ArgLP7_0, Beget-ArgLP7_1
C1_16_1	Beget	ArgLP8	La Pampa	Argentina	-36.4275	-67.1666	10:45:00	2008-11-19	2008	16	Shrubland	68.27	1	0.0266278	0.0361821	0.093576	0.154553	Larrea spp			Yebra, M.,Beget, M.E., Oricchio, P., Di Bella, C., 2010. InversiÃ³n de modelos de simulaciÃ³n de la reflectividad para la estimaciÃ³n del estado hÃ­drico del combustible vivo en matorrales y pastizales de la Argentina. Serie GeogrÃ¡fica, 16:51-59	Beget-ArgLP8_0, Beget-ArgLP8_1
C1_16_2	Beget	ArgLP8	La Pampa	Argentina	-36.4275	-67.1666	10:45:00	2008-11-19	2008	16	Shrubland	93.87	1	0.0266278	0.0361821	0.093576	0.154553	Prosopis alpataco			Yebra, M.,Beget, M.E., Oricchio, P., Di Bella, C., 2010. InversiÃ³n de modelos de simulaciÃ³n de la reflectividad para la estimaciÃ³n del estado hÃ­drico del combustible vivo en matorrales y pastizales de la Argentina. Serie GeogrÃ¡fica, 16:51-59	Beget-ArgLP8_0, Beget-ArgLP8_1
C1_16_3	Beget	ArgLP8	La Pampa	Argentina	-36.4275	-67.1666	10:45:00	2008-11-19	2008	16	Shrubland	31.37	1	0.0266278	0.0361821	0.093576	0.154553	Unknown shrub			Yebra, M.,Beget, M.E., Oricchio, P., Di Bella, C., 2010. InversiÃ³n de modelos de simulaciÃ³n de la reflectividad para la estimaciÃ³n del estado hÃ­drico del combustible vivo en matorrales y pastizales de la Argentina. Serie GeogrÃ¡fica, 16:51-59	Beget-ArgLP8_0, Beget-ArgLP8_1
C1_16_4	Beget	ArgLP8	La Pampa	Argentina	-36.4275	-67.1666	15:12:00	2009-11-29	2009	16	Shrubland	68.67	1	0.0266278	0.0361821	0.093576	0.154553	Larrea divaricata			Yebra, M.,Beget, M.E., Oricchio, P., Di Bella, C., 2010. InversiÃ³n de modelos de simulaciÃ³n de la reflectividad para la estimaciÃ³n del estado hÃ­drico del combustible vivo en matorrales y pastizales de la Argentina. Serie GeogrÃ¡fica, 16:51-59	Beget-ArgLP8_0, Beget-ArgLP8_1
C1_16_5	Beget	ArgLP8	La Pampa	Argentina	-36.4275	-67.1666	15:12:00	2009-11-29	2009	16	Shrubland	85.96	1	0.0266278	0.0361821	0.093576	0.154553	Prosopis alpataco			Yebra, M.,Beget, M.E., Oricchio, P., Di Bella, C., 2010. InversiÃ³n de modelos de simulaciÃ³n de la reflectividad para la estimaciÃ³n del estado hÃ­drico del combustible vivo en matorrales y pastizales de la Argentina. Serie GeogrÃ¡fica, 16:51-59	Beget-ArgLP8_0, Beget-ArgLP8_1
C1_16_6	Beget	ArgLP8	La Pampa	Argentina	-36.4275	-67.1666	15:12:00	2009-11-29	2009	16	Shrubland	6.94	1	0.0266278	0.0361821	0.093576	0.154553	Unknown grass			Yebra, M.,Beget, M.E., Oricchio, P., Di Bella, C., 2010. InversiÃ³n de modelos de simulaciÃ³n de la reflectividad para la estimaciÃ³n del estado hÃ­drico del combustible vivo en matorrales y pastizales de la Argentina. Serie GeogrÃ¡fica, 16:51-59	Beget-ArgLP8_0, Beget-ArgLP8_1
C1_16_7	Beget	ArgLP8	La Pampa	Argentina	-36.4275	-67.1666	15:50:00	2010-03-15	2010	16	Shrubland	104.11	1	0.0266278	0.0361821	0.093576	0.154553	Larrea divaricata			Yebra, M.,Beget, M.E., Oricchio, P., Di Bella, C., 2010. InversiÃ³n de modelos de simulaciÃ³n de la reflectividad para la estimaciÃ³n del estado hÃ­drico del combustible vivo en matorrales y pastizales de la Argentina. Serie GeogrÃ¡fica, 16:51-59	Beget-ArgLP8_0, Beget-ArgLP8_1
C1_16_8	Beget	ArgLP8	La Pampa	Argentina	-36.4275	-67.1666	15:50:00	2010-03-15	2010	16	Shrubland	115.78	1	0.0266278	0.0361821	0.093576	0.154553	Prosopis alpataco			Yebra, M.,Beget, M.E., Oricchio, P., Di Bella, C., 2010. InversiÃ³n de modelos de simulaciÃ³n de la reflectividad para la estimaciÃ³n del estado hÃ­drico del combustible vivo en matorrales y pastizales de la Argentina. Serie GeogrÃ¡fica, 16:51-59	Beget-ArgLP8_0, Beget-ArgLP8_1
C1_16_9	Beget	ArgLP8	La Pampa	Argentina	-36.4275	-67.1666	15:50:00	2010-03-15	2010	16	Shrubland	54.97	1	0.0266278	0.0361821	0.093576	0.154553	Unknown grass			Yebra, M.,Beget, M.E., Oricchio, P., Di Bella, C., 2010. InversiÃ³n de modelos de simulaciÃ³n de la reflectividad para la estimaciÃ³n del estado hÃ­drico del combustible vivo en matorrales y pastizales de la Argentina. Serie GeogrÃ¡fica, 16:51-59	Beget-ArgLP8_0, Beget-ArgLP8_1
C1_16_10	Beget	ArgLP8	La Pampa	Argentina	-36.4275	-67.1666		2010-05-18	2010	16	Shrubland	71.21	1	0.0266278	0.0361821	0.093576	0.154553	Larrea divaricata			Yebra, M.,Beget, M.E., Oricchio, P., Di Bella, C., 2010. InversiÃ³n de modelos de simulaciÃ³n de la reflectividad para la estimaciÃ³n del estado hÃ­drico del combustible vivo en matorrales y pastizales de la Argentina. Serie GeogrÃ¡fica, 16:51-59	Beget-ArgLP8_0, Beget-ArgLP8_1
C1_16_11	Beget	ArgLP8	La Pampa	Argentina	-36.4275	-67.1666		2010-05-18	2010	16	Shrubland	73.28	1	0.0266278	0.0361821	0.093576	0.154553	Prosopis alpataco			Yebra, M.,Beget, M.E., Oricchio, P., Di Bella, C., 2010. InversiÃ³n de modelos de simulaciÃ³n de la reflectividad para la estimaciÃ³n del estado hÃ­drico del combustible vivo en matorrales y pastizales de la Argentina. Serie GeogrÃ¡fica, 16:51-59	Beget-ArgLP8_0, Beget-ArgLP8_1
C1_16_12	Beget	ArgLP8	La Pampa	Argentina	-36.4275	-67.1666		2010-05-18	2010	16	Shrubland	25.27	1	0.0266278	0.0361821	0.093576	0.154553	Unknown grass			Yebra, M.,Beget, M.E., Oricchio, P., Di Bella, C., 2010. InversiÃ³n de modelos de simulaciÃ³n de la reflectividad para la estimaciÃ³n del estado hÃ­drico del combustible vivo en matorrales y pastizales de la Argentina. Serie GeogrÃ¡fica, 16:51-59	Beget-ArgLP8_0, Beget-ArgLP8_1
C1_17_1	Beget	ArgLP9	La Pampa	Argentina	-36.7565	-67.3767	11:45:00	2008-11-19	2008	16	Shrubland	71.1	1	0.0248548	0.0375569	0.0890635	0.156066	Larrea spp			Yebra, M.,Beget, M.E., Oricchio, P., Di Bella, C., 2010. InversiÃ³n de modelos de simulaciÃ³n de la reflectividad para la estimaciÃ³n del estado hÃ­drico del combustible vivo en matorrales y pastizales de la Argentina. Serie GeogrÃ¡fica, 16:51-59	Beget-ArgLP9_0, Beget-ArgLP9_1
C1_17_2	Beget	ArgLP9	La Pampa	Argentina	-36.7565	-67.3767	11:45:00	2008-11-19	2008	16	Shrubland	102.64	1	0.0248548	0.0375569	0.0890635	0.156066	Prosopis alpataco			Yebra, M.,Beget, M.E., Oricchio, P., Di Bella, C., 2010. InversiÃ³n de modelos de simulaciÃ³n de la reflectividad para la estimaciÃ³n del estado hÃ­drico del combustible vivo en matorrales y pastizales de la Argentina. Serie GeogrÃ¡fica, 16:51-59	Beget-ArgLP9_0, Beget-ArgLP9_1
C1_17_3	Beget	ArgLP9	La Pampa	Argentina	-36.7565	-67.3767	11:45:00	2008-11-19	2008	16	Shrubland	58.87	1	0.0248548	0.0375569	0.0890635	0.156066	Unknown shrub			Yebra, M.,Beget, M.E., Oricchio, P., Di Bella, C., 2010. InversiÃ³n de modelos de simulaciÃ³n de la reflectividad para la estimaciÃ³n del estado hÃ­drico del combustible vivo en matorrales y pastizales de la Argentina. Serie GeogrÃ¡fica, 16:51-59	Beget-ArgLP9_0, Beget-ArgLP9_1
C1_17_4	Beget	ArgLP9	La Pampa	Argentina	-36.7565	-67.3767	12:50:00	2009-02-11	2009	16	Shrubland	66.31	1	0.0248548	0.0375569	0.0890635	0.156066	Cassia aphylla			Yebra, M.,Beget, M.E., Oricchio, P., Di Bella, C., 2010. InversiÃ³n de modelos de simulaciÃ³n de la reflectividad para la estimaciÃ³n del estado hÃ­drico del combustible vivo en matorrales y pastizales de la Argentina. Serie GeogrÃ¡fica, 16:51-59	Beget-ArgLP9_0, Beget-ArgLP9_1
C1_17_5	Beget	ArgLP9	La Pampa	Argentina	-36.7565	-67.3767	12:50:00	2009-02-11	2009	16	Shrubland	22.36	1	0.0248548	0.0375569	0.0890635	0.156066	Junellia seriphioides			Yebra, M.,Beget, M.E., Oricchio, P., Di Bella, C., 2010. InversiÃ³n de modelos de simulaciÃ³n de la reflectividad para la estimaciÃ³n del estado hÃ­drico del combustible vivo en matorrales y pastizales de la Argentina. Serie GeogrÃ¡fica, 16:51-59	Beget-ArgLP9_0, Beget-ArgLP9_1
C1_17_6	Beget	ArgLP9	La Pampa	Argentina	-36.7565	-67.3767	12:50:00	2009-02-11	2009	16	Shrubland	36	1	0.0248548	0.0375569	0.0890635	0.156066	Larrea cuneifolia			Yebra, M.,Beget, M.E., Oricchio, P., Di Bella, C., 2010. InversiÃ³n de modelos de simulaciÃ³n de la reflectividad para la estimaciÃ³n del estado hÃ­drico del combustible vivo en matorrales y pastizales de la Argentina. Serie GeogrÃ¡fica, 16:51-59	Beget-ArgLP9_0, Beget-ArgLP9_1
C1_17_7	Beget	ArgLP9	La Pampa	Argentina	-36.7565	-67.3767	12:50:00	2009-02-11	2009	16	Shrubland	79.76	1	0.0248548	0.0375569	0.0890635	0.156066	Prosopis alpataco			Yebra, M.,Beget, M.E., Oricchio, P., Di Bella, C., 2010. InversiÃ³n de modelos de simulaciÃ³n de la reflectividad para la estimaciÃ³n del estado hÃ­drico del combustible vivo en matorrales y pastizales de la Argentina. Serie GeogrÃ¡fica, 16:51-59	Beget-ArgLP9_0, Beget-ArgLP9_1
C1_17_8	Beget	ArgLP9	La Pampa	Argentina	-36.7565	-67.3767	14:15:00	2009-03-17	2009	16	Shrubland	65.9	1	0.0248548	0.0375569	0.0890635	0.156066	Cassia aphylla			Yebra, M.,Beget, M.E., Oricchio, P., Di Bella, C., 2010. InversiÃ³n de modelos de simulaciÃ³n de la reflectividad para la estimaciÃ³n del estado hÃ­drico del combustible vivo en matorrales y pastizales de la Argentina. Serie GeogrÃ¡fica, 16:51-59	Beget-ArgLP9_0, Beget-ArgLP9_1
C1_17_9	Beget	ArgLP9	La Pampa	Argentina	-36.7565	-67.3767	14:15:00	2009-03-17	2009	16	Shrubland	30.03	1	0.0248548	0.0375569	0.0890635	0.156066	Junellia seriphioides			Yebra, M.,Beget, M.E., Oricchio, P., Di Bella, C., 2010. InversiÃ³n de modelos de simulaciÃ³n de la reflectividad para la estimaciÃ³n del estado hÃ­drico del combustible vivo en matorrales y pastizales de la Argentina. Serie GeogrÃ¡fica, 16:51-59	Beget-ArgLP9_0, Beget-ArgLP9_1
C1_17_10	Beget	ArgLP9	La Pampa	Argentina	-36.7565	-67.3767	14:15:00	2009-03-17	2009	16	Shrubland	58.42	1	0.0248548	0.0375569	0.0890635	0.156066	Larrea cuneifolia			Yebra, M.,Beget, M.E., Oricchio, P., Di Bella, C., 2010. InversiÃ³n de modelos de simulaciÃ³n de la reflectividad para la estimaciÃ³n del estado hÃ­drico del combustible vivo en matorrales y pastizales de la Argentina. Serie GeogrÃ¡fica, 16:51-59	Beget-ArgLP9_0, Beget-ArgLP9_1
C1_17_11	Beget	ArgLP9	La Pampa	Argentina	-36.7565	-67.3767	14:15:00	2009-03-17	2009	16	Shrubland	78.84	1	0.0248548	0.0375569	0.0890635	0.156066	Prosopis alpataco			Yebra, M.,Beget, M.E., Oricchio, P., Di Bella, C., 2010. InversiÃ³n de modelos de simulaciÃ³n de la reflectividad para la estimaciÃ³n del estado hÃ­drico del combustible vivo en matorrales y pastizales de la Argentina. Serie GeogrÃ¡fica, 16:51-59	Beget-ArgLP9_0, Beget-ArgLP9_1
C1_17_12	Beget	ArgLP9	La Pampa	Argentina	-36.7565	-67.3767	14:05:00	2009-11-29	2009	16	Shrubland	64.65	1	0.0248548	0.0375569	0.0890635	0.156066	Cassia aphylla			Yebra, M.,Beget, M.E., Oricchio, P., Di Bella, C., 2010. InversiÃ³n de modelos de simulaciÃ³n de la reflectividad para la estimaciÃ³n del estado hÃ­drico del combustible vivo en matorrales y pastizales de la Argentina. Serie GeogrÃ¡fica, 16:51-59	Beget-ArgLP9_0, Beget-ArgLP9_1
C1_17_13	Beget	ArgLP9	La Pampa	Argentina	-36.7565	-67.3767	14:05:00	2009-11-29	2009	16	Shrubland	32.92	1	0.0248548	0.0375569	0.0890635	0.156066	Junellia seriphioides			Yebra, M.,Beget, M.E., Oricchio, P., Di Bella, C., 2010. InversiÃ³n de modelos de simulaciÃ³n de la reflectividad para la estimaciÃ³n del estado hÃ­drico del combustible vivo en matorrales y pastizales de la Argentina. Serie GeogrÃ¡fica, 16:51-59	Beget-ArgLP9_0, Beget-ArgLP9_1
C1_17_14	Beget	ArgLP9	La Pampa	Argentina	-36.7565	-67.3767	14:05:00	2009-11-29	2009	16	Shrubland	56.93	1	0.0248548	0.0375569	0.0890635	0.156066	Larrea divaricata			Yebra, M.,Beget, M.E., Oricchio, P., Di Bella, C., 2010. InversiÃ³n de modelos de simulaciÃ³n de la reflectividad para la estimaciÃ³n del estado hÃ­drico del combustible vivo en matorrales y pastizales de la Argentina. Serie GeogrÃ¡fica, 16:51-59	Beget-ArgLP9_0, Beget-ArgLP9_1
C1_17_15	Beget	ArgLP9	La Pampa	Argentina	-36.7565	-67.3767	14:05:00	2009-11-29	2009	16	Shrubland	100.52	1	0.0248548	0.0375569	0.0890635	0.156066	Prosopis alpataco			Yebra, M.,Beget, M.E., Oricchio, P., Di Bella, C., 2010. InversiÃ³n de modelos de simulaciÃ³n de la reflectividad para la estimaciÃ³n del estado hÃ­drico del combustible vivo en matorrales y pastizales de la Argentina. Serie GeogrÃ¡fica, 16:51-59	Beget-ArgLP9_0, Beget-ArgLP9_1
C1_17_16	Beget	ArgLP9	La Pampa	Argentina	-36.7565	-67.3767	16:30:00	2010-03-15	2010	16	Shrubland	102.68	1	0.0248548	0.0375569	0.0890635	0.156066	Cassia aphylla			Yebra, M.,Beget, M.E., Oricchio, P., Di Bella, C., 2010. InversiÃ³n de modelos de simulaciÃ³n de la reflectividad para la estimaciÃ³n del estado hÃ­drico del combustible vivo en matorrales y pastizales de la Argentina. Serie GeogrÃ¡fica, 16:51-59	Beget-ArgLP9_0, Beget-ArgLP9_1
C1_17_17	Beget	ArgLP9	La Pampa	Argentina	-36.7565	-67.3767	16:30:00	2010-03-15	2010	16	Shrubland	79.69	1	0.0248548	0.0375569	0.0890635	0.156066	Junellia seriphioides			Yebra, M.,Beget, M.E., Oricchio, P., Di Bella, C., 2010. InversiÃ³n de modelos de simulaciÃ³n de la reflectividad para la estimaciÃ³n del estado hÃ­drico del combustible vivo en matorrales y pastizales de la Argentina. Serie GeogrÃ¡fica, 16:51-59	Beget-ArgLP9_0, Beget-ArgLP9_1
C1_17_18	Beget	ArgLP9	La Pampa	Argentina	-36.7565	-67.3767	16:30:00	2010-03-15	2010	16	Shrubland	78.02	1	0.0248548	0.0375569	0.0890635	0.156066	Larrea divaricata			Yebra, M.,Beget, M.E., Oricchio, P., Di Bella, C., 2010. InversiÃ³n de modelos de simulaciÃ³n de la reflectividad para la estimaciÃ³n del estado hÃ­drico del combustible vivo en matorrales y pastizales de la Argentina. Serie GeogrÃ¡fica, 16:51-59	Beget-ArgLP9_0, Beget-ArgLP9_1
C1_17_19	Beget	ArgLP9	La Pampa	Argentina	-36.7565	-67.3767	16:30:00	2010-03-15	2010	16	Shrubland	152.13	1	0.0248548	0.0375569	0.0890635	0.156066	Prosopis alpataco			Yebra, M.,Beget, M.E., Oricchio, P., Di Bella, C., 2010. InversiÃ³n de modelos de simulaciÃ³n de la reflectividad para la estimaciÃ³n del estado hÃ­drico del combustible vivo en matorrales y pastizales de la Argentina. Serie GeogrÃ¡fica, 16:51-59	Beget-ArgLP9_0, Beget-ArgLP9_1
C1_17_20	Beget	ArgLP9	La Pampa	Argentina	-36.7565	-67.3767		2010-05-18	2010	16	Shrubland	62.6	1	0.0248548	0.0375569	0.0890635	0.156066	Cassia aphylla			Yebra, M.,Beget, M.E., Oricchio, P., Di Bella, C., 2010. InversiÃ³n de modelos de simulaciÃ³n de la reflectividad para la estimaciÃ³n del estado hÃ­drico del combustible vivo en matorrales y pastizales de la Argentina. Serie GeogrÃ¡fica, 16:51-59	Beget-ArgLP9_0, Beget-ArgLP9_1
C1_17_21	Beget	ArgLP9	La Pampa	Argentina	-36.7565	-67.3767		2010-05-18	2010	16	Shrubland	28.92	1	0.0248548	0.0375569	0.0890635	0.156066	Junellia seriphioides			Yebra, M.,Beget, M.E., Oricchio, P., Di Bella, C., 2010. InversiÃ³n de modelos de simulaciÃ³n de la reflectividad para la estimaciÃ³n del estado hÃ­drico del combustible vivo en matorrales y pastizales de la Argentina. Serie GeogrÃ¡fica, 16:51-59	Beget-ArgLP9_0, Beget-ArgLP9_1
C1_17_22	Beget	ArgLP9	La Pampa	Argentina	-36.7565	-67.3767		2010-05-18	2010	16	Shrubland	77.9	1	0.0248548	0.0375569	0.0890635	0.156066	Prosopis alpataco			Yebra, M.,Beget, M.E., Oricchio, P., Di Bella, C., 2010. InversiÃ³n de modelos de simulaciÃ³n de la reflectividad para la estimaciÃ³n del estado hÃ­drico del combustible vivo en matorrales y pastizales de la Argentina. Serie GeogrÃ¡fica, 16:51-59	Beget-ArgLP9_0, Beget-ArgLP9_1
C2_1_1	Chuvieco	AlbAlb4	Castilla-La Mancha	Spain	38.9236	-1.717	13:00:00	2006-04-10	2006	11	Mosaic natural vegetation (tree, shrub, herbaceous cover) (>50%) / cropland (<50%)	89.33	1	0.103443	0.213076	0.280429	0.440933	Pinus halepensis			Chuvieco, E., Yebra, M., Jurdao, S., Aguado, I., Salas, F. J., García, M., Nieto, H., De Santis, A., Cocero, D., Riaño, D., Martínez, S., Zapico, E., Recondo, C., Martínez-Vega, J., Martín, M.P., Riva, J., Pérez, F. y Rodríguez-Silva, F. (2011): Field Fuel Moisture Measurements on Spanish study sites. Department of Geography, University of Alcalá, Spain. Version 1. Available online at: http://www…	Yebra_Chinchilla_1.JPG
C2_1_2	Chuvieco	AlbAlb4	Castilla-La Mancha	Spain	38.9236	-1.717	13:00:00	2006-04-10	2006	11	Mosaic natural vegetation (tree, shrub, herbaceous cover) (>50%) / cropland (<50%)	59.34	1	0.103443	0.213076	0.280429	0.440933	Stipa tenacissima			Chuvieco, E., Yebra, M., Jurdao, S., Aguado, I., Salas, F. J., García, M., Nieto, H., De Santis, A., Cocero, D., Riaño, D., Martínez, S., Zapico, E., Recondo, C., Martínez-Vega, J., Martín, M.P., Riva, J., Pérez, F. y Rodríguez-Silva, F. (2011): Field Fuel Moisture Measurements on Spanish study sites. Department of Geography, University of Alcalá, Spain. Version 1. Available online at: http://www…
C2_1_3	Chuvieco	AlbAlb4	Castilla-La Mancha	Spain	38.9236	-1.717	13:40:00	2006-07-25	2006	11	Mosaic natural vegetation (tree, shrub, herbaceous cover) (>50%) / cropland (<50%)	134.62	1	0.103443	0.213076	0.280429	0.440933	Pinus halepensis			Chuvieco, E., Yebra, M., Jurdao, S., Aguado, I., Salas, F. J., García, M., Nieto, H., De Santis, A., Cocero, D., Riaño, D., Martínez, S., Zapico, E., Recondo, C., Martínez-Vega, J., Martín, M.P., Riva, J., Pérez, F. y Rodríguez-Silva, F. (2011): Field Fuel Moisture Measurements on Spanish study sites. Department of Geography, University of Alcalá, Spain. Version 1. Available online at: http://www…	Yebra_Chinchilla2 y 3.jpg
C2_1_4	Chuvieco	AlbAlb4	Castilla-La Mancha	Spain	38.9236	-1.717	13:40:00	2006-07-25	2006	11	Mosaic natural vegetation (tree, shrub, herbaceous cover) (>50%) / cropland (<50%)	40.23	1	0.103443	0.213076	0.280429	0.440933	Stipa tenacissima			Chuvieco, E., Yebra, M., Jurdao, S., Aguado, I., Salas, F. J., García, M., Nieto, H., De Santis, A., Cocero, D., Riaño, D., Martínez, S., Zapico, E., Recondo, C., Martínez-Vega, J., Martín, M.P., Riva, J., Pérez, F. y Rodríguez-Silva, F. (2011): Field Fuel Moisture Measurements on Spanish study sites. Department of Geography, University of Alcalá, Spain. Version 1. Available online at: http://www…
C2_2_1	Chuvieco	AlbAlb5	Castilla-La Mancha	Spain	38.3052	-2.15057	16:00:00	2006-04-11	2006	11	Tree cover, needleleaved, evergreen, closed to open (>15%)	78.18	1	0.0503729	0.107793	0.102447	0.175816	Juniperus oxycedrus			Chuvieco, E., Yebra, M., Jurdao, S., Aguado, I., Salas, F. J., García, M., Nieto, H., De Santis, A., Cocero, D., Riaño, D., Martínez, S., Zapico, E., Recondo, C., Martínez-Vega, J., Martín, M.P., Riva, J., Pérez, F. y Rodríguez-Silva, F. (2011): Field Fuel Moisture Measurements on Spanish study sites. Department of Geography, University of Alcalá, Spain. Version 1. Available online at: http://www…	Yebra_Letur1.JPG
C2_2_2	Chuvieco	AlbAlb5	Castilla-La Mancha	Spain	38.3052	-2.15057	16:00:00	2006-04-11	2006	11	Tree cover, needleleaved, evergreen, closed to open (>15%)	55.46	1	0.0503729	0.107793	0.102447	0.175816	Stipa tenacissima			Chuvieco, E., Yebra, M., Jurdao, S., Aguado, I., Salas, F. J., García, M., Nieto, H., De Santis, A., Cocero, D., Riaño, D., Martínez, S., Zapico, E., Recondo, C., Martínez-Vega, J., Martín, M.P., Riva, J., Pérez, F. y Rodríguez-Silva, F. (2011): Field Fuel Moisture Measurements on Spanish study sites. Department of Geography, University of Alcalá, Spain. Version 1. Available online at: http://www…
C2_2_3	Chuvieco	AlbAlb5	Castilla-La Mancha	Spain	38.3052	-2.15057	16:00:00	2006-04-11	2006	11	Tree cover, needleleaved, evergreen, closed to open (>15%)	93.73	1	0.0503729	0.107793	0.102447	0.175816	Pinus halepensis			Chuvieco, E., Yebra, M., Jurdao, S., Aguado, I., Salas, F. J., García, M., Nieto, H., De Santis, A., Cocero, D., Riaño, D., Martínez, S., Zapico, E., Recondo, C., Martínez-Vega, J., Martín, M.P., Riva, J., Pérez, F. y Rodríguez-Silva, F. (2011): Field Fuel Moisture Measurements on Spanish study sites. Department of Geography, University of Alcalá, Spain. Version 1. Available online at: http://www…
C2_2_4	Chuvieco	AlbAlb5	Castilla-La Mancha	Spain	38.3052	-2.15057	16:00:00	2006-04-11	2006	11	Tree cover, needleleaved, evergreen, closed to open (>15%)	71.73	1	0.0503729	0.107793	0.102447	0.175816	Juniperus phoenicea			Chuvieco, E., Yebra, M., Jurdao, S., Aguado, I., Salas, F. J., García, M., Nieto, H., De Santis, A., Cocero, D., Riaño, D., Martínez, S., Zapico, E., Recondo, C., Martínez-Vega, J., Martín, M.P., Riva, J., Pérez, F. y Rodríguez-Silva, F. (2011): Field Fuel Moisture Measurements on Spanish study sites. Department of Geography, University of Alcalá, Spain. Version 1. Available online at: http://www…
C2_2_5	Chuvieco	AlbAlb5	Castilla-La Mancha	Spain	38.3052	-2.15057	16:00:00	2006-04-11	2006	11	Tree cover, needleleaved, evergreen, closed to open (>15%)	131.44	1	0.0503729	0.107793	0.102447	0.175816	Cistus clusii			Chuvieco, E., Yebra, M., Jurdao, S., Aguado, I., Salas, F. J., García, M., Nieto, H., De Santis, A., Cocero, D., Riaño, D., Martínez, S., Zapico, E., Recondo, C., Martínez-Vega, J., Martín, M.P., Riva, J., Pérez, F. y Rodríguez-Silva, F. (2011): Field Fuel Moisture Measurements on Spanish study sites. Department of Geography, University of Alcalá, Spain. Version 1. Available online at: http://www…
C2_2_6	Chuvieco	AlbAlb5	Castilla-La Mancha	Spain	38.3052	-2.15057	19:30:00	2006-07-25	2006	11	Tree cover, needleleaved, evergreen, closed to open (>15%)	75.97	1	0.0503729	0.107793	0.102447	0.175816	Juniperus oxycedrus			Chuvieco, E., Yebra, M., Jurdao, S., Aguado, I., Salas, F. J., García, M., Nieto, H., De Santis, A., Cocero, D., Riaño, D., Martínez, S., Zapico, E., Recondo, C., Martínez-Vega, J., Martín, M.P., Riva, J., Pérez, F. y Rodríguez-Silva, F. (2011): Field Fuel Moisture Measurements on Spanish study sites. Department of Geography, University of Alcalá, Spain. Version 1. Available online at: http://www…	Yebra_Letur2.JPG
C2_2_7	Chuvieco	AlbAlb5	Castilla-La Mancha	Spain	38.3052	-2.15057	19:30:00	2006-07-25	2006	11	Tree cover, needleleaved, evergreen, closed to open (>15%)	44.99	1	0.0503729	0.107793	0.102447	0.175816	Stipa tenacissima			Chuvieco, E., Yebra, M., Jurdao, S., Aguado, I., Salas, F. J., García, M., Nieto, H., De Santis, A., Cocero, D., Riaño, D., Martínez, S., Zapico, E., Recondo, C., Martínez-Vega, J., Martín, M.P., Riva, J., Pérez, F. y Rodríguez-Silva, F. (2011): Field Fuel Moisture Measurements on Spanish study sites. Department of Geography, University of Alcalá, Spain. Version 1. Available online at: http://www…
C2_2_8	Chuvieco	AlbAlb5	Castilla-La Mancha	Spain	38.3052	-2.15057	19:30:00	2006-07-25	2006	11	Tree cover, needleleaved, evergreen, closed to open (>15%)	27.24	1	0.0503729	0.107793	0.102447	0.175816	Pinus halepensis			Chuvieco, E., Yebra, M., Jurdao, S., Aguado, I., Salas, F. J., García, M., Nieto, H., De Santis, A., Cocero, D., Riaño, D., Martínez, S., Zapico, E., Recondo, C., Martínez-Vega, J., Martín, M.P., Riva, J., Pérez, F. y Rodríguez-Silva, F. (2011): Field Fuel Moisture Measurements on Spanish study sites. Department of Geography, University of Alcalá, Spain. Version 1. Available online at: http://www…
C2_2_9	Chuvieco	AlbAlb5	Castilla-La Mancha	Spain	38.3052	-2.15057	19:30:00	2006-07-25	2006	11	Tree cover, needleleaved, evergreen, closed to open (>15%)	68.93	1	0.0503729	0.107793	0.102447	0.175816	Juniperus phoenicea			Chuvieco, E., Yebra, M., Jurdao, S., Aguado, I., Salas, F. J., García, M., Nieto, H., De Santis, A., Cocero, D., Riaño, D., Martínez, S., Zapico, E., Recondo, C., Martínez-Vega, J., Martín, M.P., Riva, J., Pérez, F. y Rodríguez-Silva, F. (2011): Field Fuel Moisture Measurements on Spanish study sites. Department of Geography, University of Alcalá, Spain. Version 1. Available online at: http://www…
C2_2_10	Chuvieco	AlbAlb5	Castilla-La Mancha	Spain	38.3052	-2.15057	19:30:00	2006-07-25	2006	11	Tree cover, needleleaved, evergreen, closed to open (>15%)	81.31	1	0.0503729	0.107793	0.102447	0.175816	Cistus clusii			Chuvieco, E., Yebra, M., Jurdao, S., Aguado, I., Salas, F. J., García, M., Nieto, H., De Santis, A., Cocero, D., Riaño, D., Martínez, S., Zapico, E., Recondo, C., Martínez-Vega, J., Martín, M.P., Riva, J., Pérez, F. y Rodríguez-Silva, F. (2011): Field Fuel Moisture Measurements on Spanish study sites. Department of Geography, University of Alcalá, Spain. Version 1. Available online at: http://www…
C2_2_11	Chuvieco	AlbAlb5	Castilla-La Mancha	Spain	38.3052	-2.15057	19:30:00	2006-07-25	2006	11	Tree cover, needleleaved, evergreen, closed to open (>15%)	64.66	1	0.0503729	0.107793	0.102447	0.175816	Rosmarinus officinalis			Chuvieco, E., Yebra, M., Jurdao, S., Aguado, I., Salas, F. J., García, M., Nieto, H., De Santis, A., Cocero, D., Riaño, D., Martínez, S., Zapico, E., Recondo, C., Martínez-Vega, J., Martín, M.P., Riva, J., Pérez, F. y Rodríguez-Silva, F. (2011): Field Fuel Moisture Measurements on Spanish study sites. Department of Geography, University of Alcalá, Spain. Version 1. Available online at: http://www…
C2_3_1	Chuvieco	AlbAlb6	Castilla-La Mancha	Spain	38.205	-2.30826	20:30:00	2006-04-11	2006	11	Mosaic tree and shrub (>50%) / herbaceous cover (<50%)	149.32	1	0.0642346	0.128419	0.177773	0.269327	Cistus clusii			Chuvieco, E., Yebra, M., Jurdao, S., Aguado, I., Salas, F. J., García, M., Nieto, H., De Santis, A., Cocero, D., Riaño, D., Martínez, S., Zapico, E., Recondo, C., Martínez-Vega, J., Martín, M.P., Riva, J., Pérez, F. y Rodríguez-Silva, F. (2011): Field Fuel Moisture Measurements on Spanish study sites. Department of Geography, University of Alcalá, Spain. Version 1. Available online at: http://www…	Yebra_Nerpio1.JPG
C2_3_2	Chuvieco	AlbAlb6	Castilla-La Mancha	Spain	38.205	-2.30826	20:30:00	2006-04-11	2006	11	Mosaic tree and shrub (>50%) / herbaceous cover (<50%)	116.44	1	0.0642346	0.128419	0.177773	0.269327	Rosmarinus officinalis			Chuvieco, E., Yebra, M., Jurdao, S., Aguado, I., Salas, F. J., García, M., Nieto, H., De Santis, A., Cocero, D., Riaño, D., Martínez, S., Zapico, E., Recondo, C., Martínez-Vega, J., Martín, M.P., Riva, J., Pérez, F. y Rodríguez-Silva, F. (2011): Field Fuel Moisture Measurements on Spanish study sites. Department of Geography, University of Alcalá, Spain. Version 1. Available online at: http://www…
C2_3_3	Chuvieco	AlbAlb6	Castilla-La Mancha	Spain	38.205	-2.30826	20:30:00	2006-04-11	2006	11	Mosaic tree and shrub (>50%) / herbaceous cover (<50%)	97.4	1	0.0642346	0.128419	0.177773	0.269327	Juniperus oxycedrus			Chuvieco, E., Yebra, M., Jurdao, S., Aguado, I., Salas, F. J., García, M., Nieto, H., De Santis, A., Cocero, D., Riaño, D., Martínez, S., Zapico, E., Recondo, C., Martínez-Vega, J., Martín, M.P., Riva, J., Pérez, F. y Rodríguez-Silva, F. (2011): Field Fuel Moisture Measurements on Spanish study sites. Department of Geography, University of Alcalá, Spain. Version 1. Available online at: http://www…
C2_3_4	Chuvieco	AlbAlb6	Castilla-La Mancha	Spain	38.205	-2.30826	20:30:00	2006-04-11	2006	11	Mosaic tree and shrub (>50%) / herbaceous cover (<50%)	77.42	1	0.0642346	0.128419	0.177773	0.269327	Juniperus phoenicea			Chuvieco, E., Yebra, M., Jurdao, S., Aguado, I., Salas, F. J., García, M., Nieto, H., De Santis, A., Cocero, D., Riaño, D., Martínez, S., Zapico, E., Recondo, C., Martínez-Vega, J., Martín, M.P., Riva, J., Pérez, F. y Rodríguez-Silva, F. (2011): Field Fuel Moisture Measurements on Spanish study sites. Department of Geography, University of Alcalá, Spain. Version 1. Available online at: http://www…
C2_3_5	Chuvieco	AlbAlb6	Castilla-La Mancha	Spain	38.205	-2.30826	11:00:00	2006-07-26	2006	11	Mosaic tree and shrub (>50%) / herbaceous cover (<50%)	93.04	1	0.0642346	0.128419	0.177773	0.269327	Cistus clusii			Chuvieco, E., Yebra, M., Jurdao, S., Aguado, I., Salas, F. J., García, M., Nieto, H., De Santis, A., Cocero, D., Riaño, D., Martínez, S., Zapico, E., Recondo, C., Martínez-Vega, J., Martín, M.P., Riva, J., Pérez, F. y Rodríguez-Silva, F. (2011): Field Fuel Moisture Measurements on Spanish study sites. Department of Geography, University of Alcalá, Spain. Version 1. Available online at: http://www…	Yebra_Nerpio2
C2_3_6	Chuvieco	AlbAlb6	Castilla-La Mancha	Spain	38.205	-2.30826	11:00:00	2006-07-26	2006	11	Mosaic tree and shrub (>50%) / herbaceous cover (<50%)	100.59	1	0.0642346	0.128419	0.177773	0.269327	Rosmarinus officinalis			Chuvieco, E., Yebra, M., Jurdao, S., Aguado, I., Salas, F. J., García, M., Nieto, H., De Santis, A., Cocero, D., Riaño, D., Martínez, S., Zapico, E., Recondo, C., Martínez-Vega, J., Martín, M.P., Riva, J., Pérez, F. y Rodríguez-Silva, F. (2011): Field Fuel Moisture Measurements on Spanish study sites. Department of Geography, University of Alcalá, Spain. Version 1. Available online at: http://www…
C2_3_7	Chuvieco	AlbAlb6	Castilla-La Mancha	Spain	38.205	-2.30826	11:00:00	2006-07-26	2006	11	Mosaic tree and shrub (>50%) / herbaceous cover (<50%)	89.84	1	0.0642346	0.128419	0.177773	0.269327	Juniperus oxycedrus			Chuvieco, E., Yebra, M., Jurdao, S., Aguado, I., Salas, F. J., García, M., Nieto, H., De Santis, A., Cocero, D., Riaño, D., Martínez, S., Zapico, E., Recondo, C., Martínez-Vega, J., Martín, M.P., Riva, J., Pérez, F. y Rodríguez-Silva, F. (2011): Field Fuel Moisture Measurements on Spanish study sites. Department of Geography, University of Alcalá, Spain. Version 1. Available online at: http://www…
C2_3_8	Chuvieco	AlbAlb6	Castilla-La Mancha	Spain	38.205	-2.30826	11:00:00	2006-07-26	2006	11	Mosaic tree and shrub (>50%) / herbaceous cover (<50%)	73.69	1	0.0642346	0.128419	0.177773	0.269327	Juniperus phoenicea			Chuvieco, E., Yebra, M., Jurdao, S., Aguado, I., Salas, F. J., García, M., Nieto, H., De Santis, A., Cocero, D., Riaño, D., Martínez, S., Zapico, E., Recondo, C., Martínez-Vega, J., Martín, M.P., Riva, J., Pérez, F. y Rodríguez-Silva, F. (2011): Field Fuel Moisture Measurements on Spanish study sites. Department of Geography, University of Alcalá, Spain. Version 1. Available online at: http://www…
C2_4_1	Chuvieco	AndCAD7	Andalucia	Spain	36.7549	-5.43562		2001-06-15	2001	11	Mosaic tree and shrub (>50%) / herbaceous cover (<50%)	99.5807	1	0.0751616	0.100321	0.110303	0.139049	Cistus salviifolius			Chuvieco, E., Yebra, M., Jurdao, S., Aguado, I., Salas, F. J., García, M., Nieto, H., De Santis, A., Cocero, D., Riaño, D., Martínez, S., Zapico, E., Recondo, C., Martínez-Vega, J., Martín, M.P., Riva, J., Pérez, F. y Rodríguez-Silva, F. (2011): Field Fuel Moisture Measurements on Spanish study sites. Department of Geography, University of Alcalá, Spain. Version 1. Available online at: http://www…
C2_4_2	Chuvieco	AndCAD7	Andalucia	Spain	36.7549	-5.43562		2001-06-15	2001	11	Mosaic tree and shrub (>50%) / herbaceous cover (<50%)	219.942	1	0.0751616	0.100321	0.110303	0.139049	Juniperus phoenicea			Chuvieco, E., Yebra, M., Jurdao, S., Aguado, I., Salas, F. J., García, M., Nieto, H., De Santis, A., Cocero, D., Riaño, D., Martínez, S., Zapico, E., Recondo, C., Martínez-Vega, J., Martín, M.P., Riva, J., Pérez, F. y Rodríguez-Silva, F. (2011): Field Fuel Moisture Measurements on Spanish study sites. Department of Geography, University of Alcalá, Spain. Version 1. Available online at: http://www…
C2_4_3	Chuvieco	AndCAD7	Andalucia	Spain	36.7549	-5.43562		2001-06-15	2001	11	Mosaic tree and shrub (>50%) / herbaceous cover (<50%)	101.838	1	0.0751616	0.100321	0.110303	0.139049	Pistacia lentiscus			Chuvieco, E., Yebra, M., Jurdao, S., Aguado, I., Salas, F. J., García, M., Nieto, H., De Santis, A., Cocero, D., Riaño, D., Martínez, S., Zapico, E., Recondo, C., Martínez-Vega, J., Martín, M.P., Riva, J., Pérez, F. y Rodríguez-Silva, F. (2011): Field Fuel Moisture Measurements on Spanish study sites. Department of Geography, University of Alcalá, Spain. Version 1. Available online at: http://www…
C2_4_4	Chuvieco	AndCAD7	Andalucia	Spain	36.7549	-5.43562		2001-06-15	2001	11	Mosaic tree and shrub (>50%) / herbaceous cover (<50%)	179.059	1	0.0751616	0.100321	0.110303	0.139049	Crataegus monogyna			Chuvieco, E., Yebra, M., Jurdao, S., Aguado, I., Salas, F. J., García, M., Nieto, H., De Santis, A., Cocero, D., Riaño, D., Martínez, S., Zapico, E., Recondo, C., Martínez-Vega, J., Martín, M.P., Riva, J., Pérez, F. y Rodríguez-Silva, F. (2011): Field Fuel Moisture Measurements on Spanish study sites. Department of Geography, University of Alcalá, Spain. Version 1. Available online at: http://www…
C2_4_5	Chuvieco	AndCAD7	Andalucia	Spain	36.7549	-5.43562		2001-06-15	2001	11	Mosaic tree and shrub (>50%) / herbaceous cover (<50%)	82.6389	1	0.0751616	0.100321	0.110303	0.139049	Daphne gnidium			Chuvieco, E., Yebra, M., Jurdao, S., Aguado, I., Salas, F. J., García, M., Nieto, H., De Santis, A., Cocero, D., Riaño, D., Martínez, S., Zapico, E., Recondo, C., Martínez-Vega, J., Martín, M.P., Riva, J., Pérez, F. y Rodríguez-Silva, F. (2011): Field Fuel Moisture Measurements on Spanish study sites. Department of Geography, University of Alcalá, Spain. Version 1. Available online at: http://www…
C2_4_6	Chuvieco	AndCAD7	Andalucia	Spain	36.7549	-5.43562		2001-06-15	2001	11	Mosaic tree and shrub (>50%) / herbaceous cover (<50%)	212.774	1	0.0751616	0.100321	0.110303	0.139049	Quercus ilex rotundifolia			Chuvieco, E., Yebra, M., Jurdao, S., Aguado, I., Salas, F. J., García, M., Nieto, H., De Santis, A., Cocero, D., Riaño, D., Martínez, S., Zapico, E., Recondo, C., Martínez-Vega, J., Martín, M.P., Riva, J., Pérez, F. y Rodríguez-Silva, F. (2011): Field Fuel Moisture Measurements on Spanish study sites. Department of Geography, University of Alcalá, Spain. Version 1. Available online at: http://www…
C2_4_7	Chuvieco	AndCAD7	Andalucia	Spain	36.7549	-5.43562		2001-06-15	2001	11	Mosaic tree and shrub (>50%) / herbaceous cover (<50%)	86.0571	1	0.0751616	0.100321	0.110303	0.139049	Phlomis purpurea			Chuvieco, E., Yebra, M., Jurdao, S., Aguado, I., Salas, F. J., García, M., Nieto, H., De Santis, A., Cocero, D., Riaño, D., Martínez, S., Zapico, E., Recondo, C., Martínez-Vega, J., Martín, M.P., Riva, J., Pérez, F. y Rodríguez-Silva, F. (2011): Field Fuel Moisture Measurements on Spanish study sites. Department of Geography, University of Alcalá, Spain. Version 1. Available online at: http://www…
C2_4_8	Chuvieco	AndCAD7	Andalucia	Spain	36.7549	-5.43562		2001-06-30	2001	11	Mosaic tree and shrub (>50%) / herbaceous cover (<50%)	86.7769	1	0.0751616	0.100321	0.110303	0.139049	Cistus salviifolius			Chuvieco, E., Yebra, M., Jurdao, S., Aguado, I., Salas, F. J., García, M., Nieto, H., De Santis, A., Cocero, D., Riaño, D., Martínez, S., Zapico, E., Recondo, C., Martínez-Vega, J., Martín, M.P., Riva, J., Pérez, F. y Rodríguez-Silva, F. (2011): Field Fuel Moisture Measurements on Spanish study sites. Department of Geography, University of Alcalá, Spain. Version 1. Available online at: http://www…
C2_4_9	Chuvieco	AndCAD7	Andalucia	Spain	36.7549	-5.43562		2001-06-30	2001	11	Mosaic tree and shrub (>50%) / herbaceous cover (<50%)	173.84	1	0.0751616	0.100321	0.110303	0.139049	Juniperus phoenicea			Chuvieco, E., Yebra, M., Jurdao, S., Aguado, I., Salas, F. J., García, M., Nieto, H., De Santis, A., Cocero, D., Riaño, D., Martínez, S., Zapico, E., Recondo, C., Martínez-Vega, J., Martín, M.P., Riva, J., Pérez, F. y Rodríguez-Silva, F. (2011): Field Fuel Moisture Measurements on Spanish study sites. Department of Geography, University of Alcalá, Spain. Version 1. Available online at: http://www…
C2_4_10	Chuvieco	AndCAD7	Andalucia	Spain	36.7549	-5.43562		2001-06-30	2001	11	Mosaic tree and shrub (>50%) / herbaceous cover (<50%)	79.5242	1	0.0751616	0.100321	0.110303	0.139049	Pistacia lentiscus			Chuvieco, E., Yebra, M., Jurdao, S., Aguado, I., Salas, F. J., García, M., Nieto, H., De Santis, A., Cocero, D., Riaño, D., Martínez, S., Zapico, E., Recondo, C., Martínez-Vega, J., Martín, M.P., Riva, J., Pérez, F. y Rodríguez-Silva, F. (2011): Field Fuel Moisture Measurements on Spanish study sites. Department of Geography, University of Alcalá, Spain. Version 1. Available online at: http://www…
C2_4_11	Chuvieco	AndCAD7	Andalucia	Spain	36.7549	-5.43562		2001-06-30	2001	11	Mosaic tree and shrub (>50%) / herbaceous cover (<50%)	126.116	1	0.0751616	0.100321	0.110303	0.139049	Crataegus monogyna			Chuvieco, E., Yebra, M., Jurdao, S., Aguado, I., Salas, F. J., García, M., Nieto, H., De Santis, A., Cocero, D., Riaño, D., Martínez, S., Zapico, E., Recondo, C., Martínez-Vega, J., Martín, M.P., Riva, J., Pérez, F. y Rodríguez-Silva, F. (2011): Field Fuel Moisture Measurements on Spanish study sites. Department of Geography, University of Alcalá, Spain. Version 1. Available online at: http://www…
C2_4_12	Chuvieco	AndCAD7	Andalucia	Spain	36.7549	-5.43562		2001-06-30	2001	11	Mosaic tree and shrub (>50%) / herbaceous cover (<50%)	81.9493	1	0.0751616	0.100321	0.110303	0.139049	Daphne gnidium			Chuvieco, E., Yebra, M., Jurdao, S., Aguado, I., Salas, F. J., García, M., Nieto, H., De Santis, A., Cocero, D., Riaño, D., Martínez, S., Zapico, E., Recondo, C., Martínez-Vega, J., Martín, M.P., Riva, J., Pérez, F. y Rodríguez-Silva, F. (2011): Field Fuel Moisture Measurements on Spanish study sites. Department of Geography, University of Alcalá, Spain. Version 1. Available online at: http://www…
C2_4_13	Chuvieco	AndCAD7	Andalucia	Spain	36.7549	-5.43562		2001-06-30	2001	11	Mosaic tree and shrub (>50%) / herbaceous cover (<50%)	184.309	1	0.0751616	0.100321	0.110303	0.139049	Quercus ilex rotundifolia			Chuvieco, E., Yebra, M., Jurdao, S., Aguado, I., Salas, F. J., García, M., Nieto, H., De Santis, A., Cocero, D., Riaño, D., Martínez, S., Zapico, E., Recondo, C., Martínez-Vega, J., Martín, M.P., Riva, J., Pérez, F. y Rodríguez-Silva, F. (2011): Field Fuel Moisture Measurements on Spanish study sites. Department of Geography, University of Alcalá, Spain. Version 1. Available online at: http://www…
C2_4_14	Chuvieco	AndCAD7	Andalucia	Spain	36.7549	-5.43562		2001-06-30	2001	11	Mosaic tree and shrub (>50%) / herbaceous cover (<50%)	62.9707	1	0.0751616	0.100321	0.110303	0.139049	Phlomis purpurea			Chuvieco, E., Yebra, M., Jurdao, S., Aguado, I., Salas, F. J., García, M., Nieto, H., De Santis, A., Cocero, D., Riaño, D., Martínez, S., Zapico, E., Recondo, C., Martínez-Vega, J., Martín, M.P., Riva, J., Pérez, F. y Rodríguez-Silva, F. (2011): Field Fuel Moisture Measurements on Spanish study sites. Department of Geography, University of Alcalá, Spain. Version 1. Available online at: http://www…
C2_4_15	Chuvieco	AndCAD7	Andalucia	Spain	36.7549	-5.43562		2001-07-30	2001	11	Mosaic tree and shrub (>50%) / herbaceous cover (<50%)	75.93	1	0.0751616	0.100321	0.110303	0.139049	Cistus salviifolius			Chuvieco, E., Yebra, M., Jurdao, S., Aguado, I., Salas, F. J., García, M., Nieto, H., De Santis, A., Cocero, D., Riaño, D., Martínez, S., Zapico, E., Recondo, C., Martínez-Vega, J., Martín, M.P., Riva, J., Pérez, F. y Rodríguez-Silva, F. (2011): Field Fuel Moisture Measurements on Spanish study sites. Department of Geography, University of Alcalá, Spain. Version 1. Available online at: http://www…
C2_4_16	Chuvieco	AndCAD7	Andalucia	Spain	36.7549	-5.43562		2001-07-30	2001	11	Mosaic tree and shrub (>50%) / herbaceous cover (<50%)	165.952	1	0.0751616	0.100321	0.110303	0.139049	Juniperus phoenicea			Chuvieco, E., Yebra, M., Jurdao, S., Aguado, I., Salas, F. J., García, M., Nieto, H., De Santis, A., Cocero, D., Riaño, D., Martínez, S., Zapico, E., Recondo, C., Martínez-Vega, J., Martín, M.P., Riva, J., Pérez, F. y Rodríguez-Silva, F. (2011): Field Fuel Moisture Measurements on Spanish study sites. Department of Geography, University of Alcalá, Spain. Version 1. Available online at: http://www…
C2_4_17	Chuvieco	AndCAD7	Andalucia	Spain	36.7549	-5.43562		2001-07-30	2001	11	Mosaic tree and shrub (>50%) / herbaceous cover (<50%)	74.9214	1	0.0751616	0.100321	0.110303	0.139049	Pistacia lentiscus			Chuvieco, E., Yebra, M., Jurdao, S., Aguado, I., Salas, F. J., García, M., Nieto, H., De Santis, A., Cocero, D., Riaño, D., Martínez, S., Zapico, E., Recondo, C., Martínez-Vega, J., Martín, M.P., Riva, J., Pérez, F. y Rodríguez-Silva, F. (2011): Field Fuel Moisture Measurements on Spanish study sites. Department of Geography, University of Alcalá, Spain. Version 1. Available online at: http://www…
C2_4_18	Chuvieco	AndCAD7	Andalucia	Spain	36.7549	-5.43562		2001-07-30	2001	11	Mosaic tree and shrub (>50%) / herbaceous cover (<50%)	96.7472	1	0.0751616	0.100321	0.110303	0.139049	Crataegus monogyna			Chuvieco, E., Yebra, M., Jurdao, S., Aguado, I., Salas, F. J., García, M., Nieto, H., De Santis, A., Cocero, D., Riaño, D., Martínez, S., Zapico, E., Recondo, C., Martínez-Vega, J., Martín, M.P., Riva, J., Pérez, F. y Rodríguez-Silva, F. (2011): Field Fuel Moisture Measurements on Spanish study sites. Department of Geography, University of Alcalá, Spain. Version 1. Available online at: http://www…
C2_4_19	Chuvieco	AndCAD7	Andalucia	Spain	36.7549	-5.43562		2001-07-30	2001	11	Mosaic tree and shrub (>50%) / herbaceous cover (<50%)	78.2895	1	0.0751616	0.100321	0.110303	0.139049	Daphne gnidium			Chuvieco, E., Yebra, M., Jurdao, S., Aguado, I., Salas, F. J., García, M., Nieto, H., De Santis, A., Cocero, D., Riaño, D., Martínez, S., Zapico, E., Recondo, C., Martínez-Vega, J., Martín, M.P., Riva, J., Pérez, F. y Rodríguez-Silva, F. (2011): Field Fuel Moisture Measurements on Spanish study sites. Department of Geography, University of Alcalá, Spain. Version 1. Available online at: http://www…
C2_4_20	Chuvieco	AndCAD7	Andalucia	Spain	36.7549	-5.43562		2001-07-30	2001	11	Mosaic tree and shrub (>50%) / herbaceous cover (<50%)	172.635	1	0.0751616	0.100321	0.110303	0.139049	Quercus ilex rotundifolia			Chuvieco, E., Yebra, M., Jurdao, S., Aguado, I., Salas, F. J., García, M., Nieto, H., De Santis, A., Cocero, D., Riaño, D., Martínez, S., Zapico, E., Recondo, C., Martínez-Vega, J., Martín, M.P., Riva, J., Pérez, F. y Rodríguez-Silva, F. (2011): Field Fuel Moisture Measurements on Spanish study sites. Department of Geography, University of Alcalá, Spain. Version 1. Available online at: http://www…
C2_4_21	Chuvieco	AndCAD7	Andalucia	Spain	36.7549	-5.43562		2001-07-30	2001	11	Mosaic tree and shrub (>50%) / herbaceous cover (<50%)	58.9059	1	0.0751616	0.100321	0.110303	0.139049	Phlomis purpurea			Chuvieco, E., Yebra, M., Jurdao, S., Aguado, I., Salas, F. J., García, M., Nieto, H., De Santis, A., Cocero, D., Riaño, D., Martínez, S., Zapico, E., Recondo, C., Martínez-Vega, J., Martín, M.P., Riva, J., Pérez, F. y Rodríguez-Silva, F. (2011): Field Fuel Moisture Measurements on Spanish study sites. Department of Geography, University of Alcalá, Spain. Version 1. Available online at: http://www…
C2_4_22	Chuvieco	AndCAD7	Andalucia	Spain	36.7549	-5.43562		2001-08-25	2001	11	Mosaic tree and shrub (>50%) / herbaceous cover (<50%)	71.9008	1	0.0751616	0.100321	0.110303	0.139049	Cistus salviifolius			Chuvieco, E., Yebra, M., Jurdao, S., Aguado, I., Salas, F. J., García, M., Nieto, H., De Santis, A., Cocero, D., Riaño, D., Martínez, S., Zapico, E., Recondo, C., Martínez-Vega, J., Martín, M.P., Riva, J., Pérez, F. y Rodríguez-Silva, F. (2011): Field Fuel Moisture Measurements on Spanish study sites. Department of Geography, University of Alcalá, Spain. Version 1. Available online at: http://www…
C2_4_23	Chuvieco	AndCAD7	Andalucia	Spain	36.7549	-5.43562		2001-08-25	2001	11	Mosaic tree and shrub (>50%) / herbaceous cover (<50%)	159.811	1	0.0751616	0.100321	0.110303	0.139049	Juniperus phoenicea			Chuvieco, E., Yebra, M., Jurdao, S., Aguado, I., Salas, F. J., García, M., Nieto, H., De Santis, A., Cocero, D., Riaño, D., Martínez, S., Zapico, E., Recondo, C., Martínez-Vega, J., Martín, M.P., Riva, J., Pérez, F. y Rodríguez-Silva, F. (2011): Field Fuel Moisture Measurements on Spanish study sites. Department of Geography, University of Alcalá, Spain. Version 1. Available online at: http://www…
C2_4_24	Chuvieco	AndCAD7	Andalucia	Spain	36.7549	-5.43562		2001-08-25	2001	11	Mosaic tree and shrub (>50%) / herbaceous cover (<50%)	68.7151	1	0.0751616	0.100321	0.110303	0.139049	Pistacia lentiscus			Chuvieco, E., Yebra, M., Jurdao, S., Aguado, I., Salas, F. J., García, M., Nieto, H., De Santis, A., Cocero, D., Riaño, D., Martínez, S., Zapico, E., Recondo, C., Martínez-Vega, J., Martín, M.P., Riva, J., Pérez, F. y Rodríguez-Silva, F. (2011): Field Fuel Moisture Measurements on Spanish study sites. Department of Geography, University of Alcalá, Spain. Version 1. Available online at: http://www…
C2_4_25	Chuvieco	AndCAD7	Andalucia	Spain	36.7549	-5.43562		2001-08-25	2001	11	Mosaic tree and shrub (>50%) / herbaceous cover (<50%)	87.6764	1	0.0751616	0.100321	0.110303	0.139049	Crataegus monogyna			Chuvieco, E., Yebra, M., Jurdao, S., Aguado, I., Salas, F. J., García, M., Nieto, H., De Santis, A., Cocero, D., Riaño, D., Martínez, S., Zapico, E., Recondo, C., Martínez-Vega, J., Martín, M.P., Riva, J., Pérez, F. y Rodríguez-Silva, F. (2011): Field Fuel Moisture Measurements on Spanish study sites. Department of Geography, University of Alcalá, Spain. Version 1. Available online at: http://www…
C2_4_26	Chuvieco	AndCAD7	Andalucia	Spain	36.7549	-5.43562		2001-08-25	2001	11	Mosaic tree and shrub (>50%) / herbaceous cover (<50%)	73.6639	1	0.0751616	0.100321	0.110303	0.139049	Daphne gnidium			Chuvieco, E., Yebra, M., Jurdao, S., Aguado, I., Salas, F. J., García, M., Nieto, H., De Santis, A., Cocero, D., Riaño, D., Martínez, S., Zapico, E., Recondo, C., Martínez-Vega, J., Martín, M.P., Riva, J., Pérez, F. y Rodríguez-Silva, F. (2011): Field Fuel Moisture Measurements on Spanish study sites. Department of Geography, University of Alcalá, Spain. Version 1. Available online at: http://www…
C2_4_27	Chuvieco	AndCAD7	Andalucia	Spain	36.7549	-5.43562		2001-08-25	2001	11	Mosaic tree and shrub (>50%) / herbaceous cover (<50%)	163.007	1	0.0751616	0.100321	0.110303	0.139049	Quercus ilex rotundifolia			Chuvieco, E., Yebra, M., Jurdao, S., Aguado, I., Salas, F. J., García, M., Nieto, H., De Santis, A., Cocero, D., Riaño, D., Martínez, S., Zapico, E., Recondo, C., Martínez-Vega, J., Martín, M.P., Riva, J., Pérez, F. y Rodríguez-Silva, F. (2011): Field Fuel Moisture Measurements on Spanish study sites. Department of Geography, University of Alcalá, Spain. Version 1. Available online at: http://www…
C2_4_28	Chuvieco	AndCAD7	Andalucia	Spain	36.7549	-5.43562		2001-08-25	2001	11	Mosaic tree and shrub (>50%) / herbaceous cover (<50%)	55.7181	1	0.0751616	0.100321	0.110303	0.139049	Phlomis purpurea			Chuvieco, E., Yebra, M., Jurdao, S., Aguado, I., Salas, F. J., García, M., Nieto, H., De Santis, A., Cocero, D., Riaño, D., Martínez, S., Zapico, E., Recondo, C., Martínez-Vega, J., Martín, M.P., Riva, J., Pérez, F. y Rodríguez-Silva, F. (2011): Field Fuel Moisture Measurements on Spanish study sites. Department of Geography, University of Alcalá, Spain. Version 1. Available online at: http://www…
C2_5_1	Chuvieco	AndCAD8	Andalucia	Spain	36.7601	-5.38423		2001-06-14	2001	11	Mosaic tree and shrub (>50%) / herbaceous cover (<50%)	105.007	1	0.0329257	0.161019	0.0931221	0.228145	Pistacia lentiscus			Chuvieco, E., Yebra, M., Jurdao, S., Aguado, I., Salas, F. J., García, M., Nieto, H., De Santis, A., Cocero, D., Riaño, D., Martínez, S., Zapico, E., Recondo, C., Martínez-Vega, J., Martín, M.P., Riva, J., Pérez, F. y Rodríguez-Silva, F. (2011): Field Fuel Moisture Measurements on Spanish study sites. Department of Geography, University of Alcalá, Spain. Version 1. Available online at: http://www…
C2_5_2	Chuvieco	AndCAD8	Andalucia	Spain	36.7601	-5.38423		2001-06-14	2001	11	Mosaic tree and shrub (>50%) / herbaceous cover (<50%)	87.9566	1	0.0329257	0.161019	0.0931221	0.228145	Phlomis purpurea			Chuvieco, E., Yebra, M., Jurdao, S., Aguado, I., Salas, F. J., García, M., Nieto, H., De Santis, A., Cocero, D., Riaño, D., Martínez, S., Zapico, E., Recondo, C., Martínez-Vega, J., Martín, M.P., Riva, J., Pérez, F. y Rodríguez-Silva, F. (2011): Field Fuel Moisture Measurements on Spanish study sites. Department of Geography, University of Alcalá, Spain. Version 1. Available online at: http://www…
C2_5_3	Chuvieco	AndCAD8	Andalucia	Spain	36.7601	-5.38423		2001-06-14	2001	11	Mosaic tree and shrub (>50%) / herbaceous cover (<50%)	207.317	1	0.0329257	0.161019	0.0931221	0.228145	Salix caprea			Chuvieco, E., Yebra, M., Jurdao, S., Aguado, I., Salas, F. J., García, M., Nieto, H., De Santis, A., Cocero, D., Riaño, D., Martínez, S., Zapico, E., Recondo, C., Martínez-Vega, J., Martín, M.P., Riva, J., Pérez, F. y Rodríguez-Silva, F. (2011): Field Fuel Moisture Measurements on Spanish study sites. Department of Geography, University of Alcalá, Spain. Version 1. Available online at: http://www…
C2_5_4	Chuvieco	AndCAD8	Andalucia	Spain	36.7601	-5.38423		2001-06-14	2001	11	Mosaic tree and shrub (>50%) / herbaceous cover (<50%)	142.16	1	0.0329257	0.161019	0.0931221	0.228145	Daphne gnidium			Chuvieco, E., Yebra, M., Jurdao, S., Aguado, I., Salas, F. J., García, M., Nieto, H., De Santis, A., Cocero, D., Riaño, D., Martínez, S., Zapico, E., Recondo, C., Martínez-Vega, J., Martín, M.P., Riva, J., Pérez, F. y Rodríguez-Silva, F. (2011): Field Fuel Moisture Measurements on Spanish study sites. Department of Geography, University of Alcalá, Spain. Version 1. Available online at: http://www…
C2_5_5	Chuvieco	AndCAD8	Andalucia	Spain	36.7601	-5.38423		2001-06-14	2001	11	Mosaic tree and shrub (>50%) / herbaceous cover (<50%)	113.763	1	0.0329257	0.161019	0.0931221	0.228145	Gramineae spp.			Chuvieco, E., Yebra, M., Jurdao, S., Aguado, I., Salas, F. J., García, M., Nieto, H., De Santis, A., Cocero, D., Riaño, D., Martínez, S., Zapico, E., Recondo, C., Martínez-Vega, J., Martín, M.P., Riva, J., Pérez, F. y Rodríguez-Silva, F. (2011): Field Fuel Moisture Measurements on Spanish study sites. Department of Geography, University of Alcalá, Spain. Version 1. Available online at: http://www…
C2_5_6	Chuvieco	AndCAD8	Andalucia	Spain	36.7601	-5.38423		2001-06-14	2001	11	Mosaic tree and shrub (>50%) / herbaceous cover (<50%)	154.723	1	0.0329257	0.161019	0.0931221	0.228145	Crataegus monogyna			Chuvieco, E., Yebra, M., Jurdao, S., Aguado, I., Salas, F. J., García, M., Nieto, H., De Santis, A., Cocero, D., Riaño, D., Martínez, S., Zapico, E., Recondo, C., Martínez-Vega, J., Martín, M.P., Riva, J., Pérez, F. y Rodríguez-Silva, F. (2011): Field Fuel Moisture Measurements on Spanish study sites. Department of Geography, University of Alcalá, Spain. Version 1. Available online at: http://www…
C2_5_7	Chuvieco	AndCAD8	Andalucia	Spain	36.7601	-5.38423		2001-06-14	2001	11	Mosaic tree and shrub (>50%) / herbaceous cover (<50%)	116.144	1	0.0329257	0.161019	0.0931221	0.228145	Teucrium fruticans			Chuvieco, E., Yebra, M., Jurdao, S., Aguado, I., Salas, F. J., García, M., Nieto, H., De Santis, A., Cocero, D., Riaño, D., Martínez, S., Zapico, E., Recondo, C., Martínez-Vega, J., Martín, M.P., Riva, J., Pérez, F. y Rodríguez-Silva, F. (2011): Field Fuel Moisture Measurements on Spanish study sites. Department of Geography, University of Alcalá, Spain. Version 1. Available online at: http://www…
C2_5_8	Chuvieco	AndCAD8	Andalucia	Spain	36.7601	-5.38423		2001-06-14	2001	11	Mosaic tree and shrub (>50%) / herbaceous cover (<50%)	215.158	1	0.0329257	0.161019	0.0931221	0.228145	Pinus pinaster			Chuvieco, E., Yebra, M., Jurdao, S., Aguado, I., Salas, F. J., García, M., Nieto, H., De Santis, A., Cocero, D., Riaño, D., Martínez, S., Zapico, E., Recondo, C., Martínez-Vega, J., Martín, M.P., Riva, J., Pérez, F. y Rodríguez-Silva, F. (2011): Field Fuel Moisture Measurements on Spanish study sites. Department of Geography, University of Alcalá, Spain. Version 1. Available online at: http://www…
C2_5_9	Chuvieco	AndCAD8	Andalucia	Spain	36.7601	-5.38423		2001-06-22	2001	11	Mosaic tree and shrub (>50%) / herbaceous cover (<50%)	100.71	1	0.0329257	0.161019	0.0931221	0.228145	Pistacia lentiscus			Chuvieco, E., Yebra, M., Jurdao, S., Aguado, I., Salas, F. J., García, M., Nieto, H., De Santis, A., Cocero, D., Riaño, D., Martínez, S., Zapico, E., Recondo, C., Martínez-Vega, J., Martín, M.P., Riva, J., Pérez, F. y Rodríguez-Silva, F. (2011): Field Fuel Moisture Measurements on Spanish study sites. Department of Geography, University of Alcalá, Spain. Version 1. Available online at: http://www…
C2_5_10	Chuvieco	AndCAD8	Andalucia	Spain	36.7601	-5.38423		2001-06-22	2001	11	Mosaic tree and shrub (>50%) / herbaceous cover (<50%)	78.5291	1	0.0329257	0.161019	0.0931221	0.228145	Phlomis purpurea			Chuvieco, E., Yebra, M., Jurdao, S., Aguado, I., Salas, F. J., García, M., Nieto, H., De Santis, A., Cocero, D., Riaño, D., Martínez, S., Zapico, E., Recondo, C., Martínez-Vega, J., Martín, M.P., Riva, J., Pérez, F. y Rodríguez-Silva, F. (2011): Field Fuel Moisture Measurements on Spanish study sites. Department of Geography, University of Alcalá, Spain. Version 1. Available online at: http://www…
C2_5_11	Chuvieco	AndCAD8	Andalucia	Spain	36.7601	-5.38423		2001-06-22	2001	11	Mosaic tree and shrub (>50%) / herbaceous cover (<50%)	99.8768	1	0.0329257	0.161019	0.0931221	0.228145	Salix caprea			Chuvieco, E., Yebra, M., Jurdao, S., Aguado, I., Salas, F. J., García, M., Nieto, H., De Santis, A., Cocero, D., Riaño, D., Martínez, S., Zapico, E., Recondo, C., Martínez-Vega, J., Martín, M.P., Riva, J., Pérez, F. y Rodríguez-Silva, F. (2011): Field Fuel Moisture Measurements on Spanish study sites. Department of Geography, University of Alcalá, Spain. Version 1. Available online at: http://www…
C2_5_12	Chuvieco	AndCAD8	Andalucia	Spain	36.7601	-5.38423		2001-06-22	2001	11	Mosaic tree and shrub (>50%) / herbaceous cover (<50%)	98.1405	1	0.0329257	0.161019	0.0931221	0.228145	Daphne gnidium			Chuvieco, E., Yebra, M., Jurdao, S., Aguado, I., Salas, F. J., García, M., Nieto, H., De Santis, A., Cocero, D., Riaño, D., Martínez, S., Zapico, E., Recondo, C., Martínez-Vega, J., Martín, M.P., Riva, J., Pérez, F. y Rodríguez-Silva, F. (2011): Field Fuel Moisture Measurements on Spanish study sites. Department of Geography, University of Alcalá, Spain. Version 1. Available online at: http://www…
C2_5_13	Chuvieco	AndCAD8	Andalucia	Spain	36.7601	-5.38423		2001-06-22	2001	11	Mosaic tree and shrub (>50%) / herbaceous cover (<50%)	96.9697	1	0.0329257	0.161019	0.0931221	0.228145	Gramineae spp.			Chuvieco, E., Yebra, M., Jurdao, S., Aguado, I., Salas, F. J., García, M., Nieto, H., De Santis, A., Cocero, D., Riaño, D., Martínez, S., Zapico, E., Recondo, C., Martínez-Vega, J., Martín, M.P., Riva, J., Pérez, F. y Rodríguez-Silva, F. (2011): Field Fuel Moisture Measurements on Spanish study sites. Department of Geography, University of Alcalá, Spain. Version 1. Available online at: http://www…
C2_5_14	Chuvieco	AndCAD8	Andalucia	Spain	36.7601	-5.38423		2001-06-22	2001	11	Mosaic tree and shrub (>50%) / herbaceous cover (<50%)	148.706	1	0.0329257	0.161019	0.0931221	0.228145	Crataegus monogyna			Chuvieco, E., Yebra, M., Jurdao, S., Aguado, I., Salas, F. J., García, M., Nieto, H., De Santis, A., Cocero, D., Riaño, D., Martínez, S., Zapico, E., Recondo, C., Martínez-Vega, J., Martín, M.P., Riva, J., Pérez, F. y Rodríguez-Silva, F. (2011): Field Fuel Moisture Measurements on Spanish study sites. Department of Geography, University of Alcalá, Spain. Version 1. Available online at: http://www…
C2_5_15	Chuvieco	AndCAD8	Andalucia	Spain	36.7601	-5.38423		2001-06-22	2001	11	Mosaic tree and shrub (>50%) / herbaceous cover (<50%)	86.7596	1	0.0329257	0.161019	0.0931221	0.228145	Teucrium fruticans			Chuvieco, E., Yebra, M., Jurdao, S., Aguado, I., Salas, F. J., García, M., Nieto, H., De Santis, A., Cocero, D., Riaño, D., Martínez, S., Zapico, E., Recondo, C., Martínez-Vega, J., Martín, M.P., Riva, J., Pérez, F. y Rodríguez-Silva, F. (2011): Field Fuel Moisture Measurements on Spanish study sites. Department of Geography, University of Alcalá, Spain. Version 1. Available online at: http://www…
C2_5_16	Chuvieco	AndCAD8	Andalucia	Spain	36.7601	-5.38423		2001-06-22	2001	11	Mosaic tree and shrub (>50%) / herbaceous cover (<50%)	205.617	1	0.0329257	0.161019	0.0931221	0.228145	Pinus pinaster			Chuvieco, E., Yebra, M., Jurdao, S., Aguado, I., Salas, F. J., García, M., Nieto, H., De Santis, A., Cocero, D., Riaño, D., Martínez, S., Zapico, E., Recondo, C., Martínez-Vega, J., Martín, M.P., Riva, J., Pérez, F. y Rodríguez-Silva, F. (2011): Field Fuel Moisture Measurements on Spanish study sites. Department of Geography, University of Alcalá, Spain. Version 1. Available online at: http://www…
C2_5_17	Chuvieco	AndCAD8	Andalucia	Spain	36.7601	-5.38423		2001-07-16	2001	11	Mosaic tree and shrub (>50%) / herbaceous cover (<50%)	96.2963	1	0.0329257	0.161019	0.0931221	0.228145	Pistacia lentiscus			Chuvieco, E., Yebra, M., Jurdao, S., Aguado, I., Salas, F. J., García, M., Nieto, H., De Santis, A., Cocero, D., Riaño, D., Martínez, S., Zapico, E., Recondo, C., Martínez-Vega, J., Martín, M.P., Riva, J., Pérez, F. y Rodríguez-Silva, F. (2011): Field Fuel Moisture Measurements on Spanish study sites. Department of Geography, University of Alcalá, Spain. Version 1. Available online at: http://www…
C2_5_18	Chuvieco	AndCAD8	Andalucia	Spain	36.7601	-5.38423		2001-07-16	2001	11	Mosaic tree and shrub (>50%) / herbaceous cover (<50%)	76.516	1	0.0329257	0.161019	0.0931221	0.228145	Phlomis purpurea			Chuvieco, E., Yebra, M., Jurdao, S., Aguado, I., Salas, F. J., García, M., Nieto, H., De Santis, A., Cocero, D., Riaño, D., Martínez, S., Zapico, E., Recondo, C., Martínez-Vega, J., Martín, M.P., Riva, J., Pérez, F. y Rodríguez-Silva, F. (2011): Field Fuel Moisture Measurements on Spanish study sites. Department of Geography, University of Alcalá, Spain. Version 1. Available online at: http://www…
C2_5_19	Chuvieco	AndCAD8	Andalucia	Spain	36.7601	-5.38423		2001-07-16	2001	11	Mosaic tree and shrub (>50%) / herbaceous cover (<50%)	88.8476	1	0.0329257	0.161019	0.0931221	0.228145	Salix caprea			Chuvieco, E., Yebra, M., Jurdao, S., Aguado, I., Salas, F. J., García, M., Nieto, H., De Santis, A., Cocero, D., Riaño, D., Martínez, S., Zapico, E., Recondo, C., Martínez-Vega, J., Martín, M.P., Riva, J., Pérez, F. y Rodríguez-Silva, F. (2011): Field Fuel Moisture Measurements on Spanish study sites. Department of Geography, University of Alcalá, Spain. Version 1. Available online at: http://www…
C2_5_20	Chuvieco	AndCAD8	Andalucia	Spain	36.7601	-5.38423		2001-07-16	2001	11	Mosaic tree and shrub (>50%) / herbaceous cover (<50%)	82.5899	1	0.0329257	0.161019	0.0931221	0.228145	Daphne gnidium			Chuvieco, E., Yebra, M., Jurdao, S., Aguado, I., Salas, F. J., García, M., Nieto, H., De Santis, A., Cocero, D., Riaño, D., Martínez, S., Zapico, E., Recondo, C., Martínez-Vega, J., Martín, M.P., Riva, J., Pérez, F. y Rodríguez-Silva, F. (2011): Field Fuel Moisture Measurements on Spanish study sites. Department of Geography, University of Alcalá, Spain. Version 1. Available online at: http://www…
C2_5_21	Chuvieco	AndCAD8	Andalucia	Spain	36.7601	-5.38423		2001-07-16	2001	11	Mosaic tree and shrub (>50%) / herbaceous cover (<50%)	56.6667	1	0.0329257	0.161019	0.0931221	0.228145	Gramineae spp.			Chuvieco, E., Yebra, M., Jurdao, S., Aguado, I., Salas, F. J., García, M., Nieto, H., De Santis, A., Cocero, D., Riaño, D., Martínez, S., Zapico, E., Recondo, C., Martínez-Vega, J., Martín, M.P., Riva, J., Pérez, F. y Rodríguez-Silva, F. (2011): Field Fuel Moisture Measurements on Spanish study sites. Department of Geography, University of Alcalá, Spain. Version 1. Available online at: http://www…
C2_5_22	Chuvieco	AndCAD8	Andalucia	Spain	36.7601	-5.38423		2001-07-16	2001	11	Mosaic tree and shrub (>50%) / herbaceous cover (<50%)	129.194	1	0.0329257	0.161019	0.0931221	0.228145	Crataegus monogyna			Chuvieco, E., Yebra, M., Jurdao, S., Aguado, I., Salas, F. J., García, M., Nieto, H., De Santis, A., Cocero, D., Riaño, D., Martínez, S., Zapico, E., Recondo, C., Martínez-Vega, J., Martín, M.P., Riva, J., Pérez, F. y Rodríguez-Silva, F. (2011): Field Fuel Moisture Measurements on Spanish study sites. Department of Geography, University of Alcalá, Spain. Version 1. Available online at: http://www…
C2_5_23	Chuvieco	AndCAD8	Andalucia	Spain	36.7601	-5.38423		2001-07-16	2001	11	Mosaic tree and shrub (>50%) / herbaceous cover (<50%)	69.9749	1	0.0329257	0.161019	0.0931221	0.228145	Teucrium fruticans			Chuvieco, E., Yebra, M., Jurdao, S., Aguado, I., Salas, F. J., García, M., Nieto, H., De Santis, A., Cocero, D., Riaño, D., Martínez, S., Zapico, E., Recondo, C., Martínez-Vega, J., Martín, M.P., Riva, J., Pérez, F. y Rodríguez-Silva, F. (2011): Field Fuel Moisture Measurements on Spanish study sites. Department of Geography, University of Alcalá, Spain. Version 1. Available online at: http://www…
C2_5_24	Chuvieco	AndCAD8	Andalucia	Spain	36.7601	-5.38423		2001-07-16	2001	11	Mosaic tree and shrub (>50%) / herbaceous cover (<50%)	177.916	1	0.0329257	0.161019	0.0931221	0.228145	Pinus pinaster			Chuvieco, E., Yebra, M., Jurdao, S., Aguado, I., Salas, F. J., García, M., Nieto, H., De Santis, A., Cocero, D., Riaño, D., Martínez, S., Zapico, E., Recondo, C., Martínez-Vega, J., Martín, M.P., Riva, J., Pérez, F. y Rodríguez-Silva, F. (2011): Field Fuel Moisture Measurements on Spanish study sites. Department of Geography, University of Alcalá, Spain. Version 1. Available online at: http://www…
C2_5_25	Chuvieco	AndCAD8	Andalucia	Spain	36.7601	-5.38423		2001-08-10	2001	11	Mosaic tree and shrub (>50%) / herbaceous cover (<50%)	82.947	1	0.0329257	0.161019	0.0931221	0.228145	Pistacia lentiscus			Chuvieco, E., Yebra, M., Jurdao, S., Aguado, I., Salas, F. J., García, M., Nieto, H., De Santis, A., Cocero, D., Riaño, D., Martínez, S., Zapico, E., Recondo, C., Martínez-Vega, J., Martín, M.P., Riva, J., Pérez, F. y Rodríguez-Silva, F. (2011): Field Fuel Moisture Measurements on Spanish study sites. Department of Geography, University of Alcalá, Spain. Version 1. Available online at: http://www…
C2_5_26	Chuvieco	AndCAD8	Andalucia	Spain	36.7601	-5.38423		2001-08-10	2001	11	Mosaic tree and shrub (>50%) / herbaceous cover (<50%)	71.2798	1	0.0329257	0.161019	0.0931221	0.228145	Phlomis purpurea			Chuvieco, E., Yebra, M., Jurdao, S., Aguado, I., Salas, F. J., García, M., Nieto, H., De Santis, A., Cocero, D., Riaño, D., Martínez, S., Zapico, E., Recondo, C., Martínez-Vega, J., Martín, M.P., Riva, J., Pérez, F. y Rodríguez-Silva, F. (2011): Field Fuel Moisture Measurements on Spanish study sites. Department of Geography, University of Alcalá, Spain. Version 1. Available online at: http://www…
C2_5_27	Chuvieco	AndCAD8	Andalucia	Spain	36.7601	-5.38423		2001-08-10	2001	11	Mosaic tree and shrub (>50%) / herbaceous cover (<50%)	74.2443	1	0.0329257	0.161019	0.0931221	0.228145	Salix caprea			Chuvieco, E., Yebra, M., Jurdao, S., Aguado, I., Salas, F. J., García, M., Nieto, H., De Santis, A., Cocero, D., Riaño, D., Martínez, S., Zapico, E., Recondo, C., Martínez-Vega, J., Martín, M.P., Riva, J., Pérez, F. y Rodríguez-Silva, F. (2011): Field Fuel Moisture Measurements on Spanish study sites. Department of Geography, University of Alcalá, Spain. Version 1. Available online at: http://www…
C2_5_28	Chuvieco	AndCAD8	Andalucia	Spain	36.7601	-5.38423		2001-08-10	2001	11	Mosaic tree and shrub (>50%) / herbaceous cover (<50%)	77.1596	1	0.0329257	0.161019	0.0931221	0.228145	Daphne gnidium			Chuvieco, E., Yebra, M., Jurdao, S., Aguado, I., Salas, F. J., García, M., Nieto, H., De Santis, A., Cocero, D., Riaño, D., Martínez, S., Zapico, E., Recondo, C., Martínez-Vega, J., Martín, M.P., Riva, J., Pérez, F. y Rodríguez-Silva, F. (2011): Field Fuel Moisture Measurements on Spanish study sites. Department of Geography, University of Alcalá, Spain. Version 1. Available online at: http://www…
C2_5_29	Chuvieco	AndCAD8	Andalucia	Spain	36.7601	-5.38423		2001-08-10	2001	11	Mosaic tree and shrub (>50%) / herbaceous cover (<50%)	47.8797	1	0.0329257	0.161019	0.0931221	0.228145	Gramineae spp.			Chuvieco, E., Yebra, M., Jurdao, S., Aguado, I., Salas, F. J., García, M., Nieto, H., De Santis, A., Cocero, D., Riaño, D., Martínez, S., Zapico, E., Recondo, C., Martínez-Vega, J., Martín, M.P., Riva, J., Pérez, F. y Rodríguez-Silva, F. (2011): Field Fuel Moisture Measurements on Spanish study sites. Department of Geography, University of Alcalá, Spain. Version 1. Available online at: http://www…
C2_5_30	Chuvieco	AndCAD8	Andalucia	Spain	36.7601	-5.38423		2001-08-10	2001	11	Mosaic tree and shrub (>50%) / herbaceous cover (<50%)	104.06	1	0.0329257	0.161019	0.0931221	0.228145	Crataegus monogyna			Chuvieco, E., Yebra, M., Jurdao, S., Aguado, I., Salas, F. J., García, M., Nieto, H., De Santis, A., Cocero, D., Riaño, D., Martínez, S., Zapico, E., Recondo, C., Martínez-Vega, J., Martín, M.P., Riva, J., Pérez, F. y Rodríguez-Silva, F. (2011): Field Fuel Moisture Measurements on Spanish study sites. Department of Geography, University of Alcalá, Spain. Version 1. Available online at: http://www…
C2_5_31	Chuvieco	AndCAD8	Andalucia	Spain	36.7601	-5.38423		2001-08-10	2001	11	Mosaic tree and shrub (>50%) / herbaceous cover (<50%)	60.7874	1	0.0329257	0.161019	0.0931221	0.228145	Teucrium fruticans			Chuvieco, E., Yebra, M., Jurdao, S., Aguado, I., Salas, F. J., García, M., Nieto, H., De Santis, A., Cocero, D., Riaño, D., Martínez, S., Zapico, E., Recondo, C., Martínez-Vega, J., Martín, M.P., Riva, J., Pérez, F. y Rodríguez-Silva, F. (2011): Field Fuel Moisture Measurements on Spanish study sites. Department of Geography, University of Alcalá, Spain. Version 1. Available online at: http://www…
C2_5_32	Chuvieco	AndCAD8	Andalucia	Spain	36.7601	-5.38423		2001-08-10	2001	11	Mosaic tree and shrub (>50%) / herbaceous cover (<50%)	160.396	1	0.0329257	0.161019	0.0931221	0.228145	Pinus pinaster			Chuvieco, E., Yebra, M., Jurdao, S., Aguado, I., Salas, F. J., García, M., Nieto, H., De Santis, A., Cocero, D., Riaño, D., Martínez, S., Zapico, E., Recondo, C., Martínez-Vega, J., Martín, M.P., Riva, J., Pérez, F. y Rodríguez-Silva, F. (2011): Field Fuel Moisture Measurements on Spanish study sites. Department of Geography, University of Alcalá, Spain. Version 1. Available online at: http://www…
C2_5_33	Chuvieco	AndCAD8	Andalucia	Spain	36.7601	-5.38423		2001-09-10	2001	11	Mosaic tree and shrub (>50%) / herbaceous cover (<50%)	75.514	1	0.0329257	0.161019	0.0931221	0.228145	Pistacia lentiscus			Chuvieco, E., Yebra, M., Jurdao, S., Aguado, I., Salas, F. J., García, M., Nieto, H., De Santis, A., Cocero, D., Riaño, D., Martínez, S., Zapico, E., Recondo, C., Martínez-Vega, J., Martín, M.P., Riva, J., Pérez, F. y Rodríguez-Silva, F. (2011): Field Fuel Moisture Measurements on Spanish study sites. Department of Geography, University of Alcalá, Spain. Version 1. Available online at: http://www…
C2_5_34	Chuvieco	AndCAD8	Andalucia	Spain	36.7601	-5.38423		2001-09-10	2001	11	Mosaic tree and shrub (>50%) / herbaceous cover (<50%)	65.7729	1	0.0329257	0.161019	0.0931221	0.228145	Phlomis purpurea			Chuvieco, E., Yebra, M., Jurdao, S., Aguado, I., Salas, F. J., García, M., Nieto, H., De Santis, A., Cocero, D., Riaño, D., Martínez, S., Zapico, E., Recondo, C., Martínez-Vega, J., Martín, M.P., Riva, J., Pérez, F. y Rodríguez-Silva, F. (2011): Field Fuel Moisture Measurements on Spanish study sites. Department of Geography, University of Alcalá, Spain. Version 1. Available online at: http://www…
C2_5_35	Chuvieco	AndCAD8	Andalucia	Spain	36.7601	-5.38423		2001-09-10	2001	11	Mosaic tree and shrub (>50%) / herbaceous cover (<50%)	73.652	1	0.0329257	0.161019	0.0931221	0.228145	Salix caprea			Chuvieco, E., Yebra, M., Jurdao, S., Aguado, I., Salas, F. J., García, M., Nieto, H., De Santis, A., Cocero, D., Riaño, D., Martínez, S., Zapico, E., Recondo, C., Martínez-Vega, J., Martín, M.P., Riva, J., Pérez, F. y Rodríguez-Silva, F. (2011): Field Fuel Moisture Measurements on Spanish study sites. Department of Geography, University of Alcalá, Spain. Version 1. Available online at: http://www…
C2_5_36	Chuvieco	AndCAD8	Andalucia	Spain	36.7601	-5.38423		2001-09-10	2001	11	Mosaic tree and shrub (>50%) / herbaceous cover (<50%)	74.5327	1	0.0329257	0.161019	0.0931221	0.228145	Daphne gnidium			Chuvieco, E., Yebra, M., Jurdao, S., Aguado, I., Salas, F. J., García, M., Nieto, H., De Santis, A., Cocero, D., Riaño, D., Martínez, S., Zapico, E., Recondo, C., Martínez-Vega, J., Martín, M.P., Riva, J., Pérez, F. y Rodríguez-Silva, F. (2011): Field Fuel Moisture Measurements on Spanish study sites. Department of Geography, University of Alcalá, Spain. Version 1. Available online at: http://www…
C2_5_37	Chuvieco	AndCAD8	Andalucia	Spain	36.7601	-5.38423		2001-09-10	2001	11	Mosaic tree and shrub (>50%) / herbaceous cover (<50%)	27.0769	1	0.0329257	0.161019	0.0931221	0.228145	Gramineae spp.			Chuvieco, E., Yebra, M., Jurdao, S., Aguado, I., Salas, F. J., García, M., Nieto, H., De Santis, A., Cocero, D., Riaño, D., Martínez, S., Zapico, E., Recondo, C., Martínez-Vega, J., Martín, M.P., Riva, J., Pérez, F. y Rodríguez-Silva, F. (2011): Field Fuel Moisture Measurements on Spanish study sites. Department of Geography, University of Alcalá, Spain. Version 1. Available online at: http://www…
C2_5_38	Chuvieco	AndCAD8	Andalucia	Spain	36.7601	-5.38423		2001-09-10	2001	11	Mosaic tree and shrub (>50%) / herbaceous cover (<50%)	95.8974	1	0.0329257	0.161019	0.0931221	0.228145	Crataegus monogyna			Chuvieco, E., Yebra, M., Jurdao, S., Aguado, I., Salas, F. J., García, M., Nieto, H., De Santis, A., Cocero, D., Riaño, D., Martínez, S., Zapico, E., Recondo, C., Martínez-Vega, J., Martín, M.P., Riva, J., Pérez, F. y Rodríguez-Silva, F. (2011): Field Fuel Moisture Measurements on Spanish study sites. Department of Geography, University of Alcalá, Spain. Version 1. Available online at: http://www…
C2_5_39	Chuvieco	AndCAD8	Andalucia	Spain	36.7601	-5.38423		2001-09-10	2001	11	Mosaic tree and shrub (>50%) / herbaceous cover (<50%)	51.1006	1	0.0329257	0.161019	0.0931221	0.228145	Teucrium fruticans			Chuvieco, E., Yebra, M., Jurdao, S., Aguado, I., Salas, F. J., García, M., Nieto, H., De Santis, A., Cocero, D., Riaño, D., Martínez, S., Zapico, E., Recondo, C., Martínez-Vega, J., Martín, M.P., Riva, J., Pérez, F. y Rodríguez-Silva, F. (2011): Field Fuel Moisture Measurements on Spanish study sites. Department of Geography, University of Alcalá, Spain. Version 1. Available online at: http://www…
C2_5_40	Chuvieco	AndCAD8	Andalucia	Spain	36.7601	-5.38423		2001-09-10	2001	11	Mosaic tree and shrub (>50%) / herbaceous cover (<50%)	157.354	1	0.0329257	0.161019	0.0931221	0.228145	Pinus pinaster			Chuvieco, E., Yebra, M., Jurdao, S., Aguado, I., Salas, F. J., García, M., Nieto, H., De Santis, A., Cocero, D., Riaño, D., Martínez, S., Zapico, E., Recondo, C., Martínez-Vega, J., Martín, M.P., Riva, J., Pérez, F. y Rodríguez-Silva, F. (2011): Field Fuel Moisture Measurements on Spanish study sites. Department of Geography, University of Alcalá, Spain. Version 1. Available online at: http://www…
C2_6_1	Chuvieco	AraCin10	Aragon	Spain	42.2937	-0.907666		2001-05-24	2001	11	Tree cover, needleleaved, evergreen, closed to open (>15%)	123.323	1	0.0544405	0.0753405	0.0802154	0.117875	Pinus sylvestris			Chuvieco, E., Yebra, M., Jurdao, S., Aguado, I., Salas, F. J., García, M., Nieto, H., De Santis, A., Cocero, D., Riaño, D., Martínez, S., Zapico, E., Recondo, C., Martínez-Vega, J., Martín, M.P., Riva, J., Pérez, F. y Rodríguez-Silva, F. (2011): Field Fuel Moisture Measurements on Spanish study sites. Department of Geography, University of Alcalá, Spain. Version 1. Available online at: http://www…
C2_6_2	Chuvieco	AraCin10	Aragon	Spain	42.2937	-0.907666		2001-05-24	2001	11	Tree cover, needleleaved, evergreen, closed to open (>15%)	174.102	1	0.0544405	0.0753405	0.0802154	0.117875	Quercus ilex			Chuvieco, E., Yebra, M., Jurdao, S., Aguado, I., Salas, F. J., García, M., Nieto, H., De Santis, A., Cocero, D., Riaño, D., Martínez, S., Zapico, E., Recondo, C., Martínez-Vega, J., Martín, M.P., Riva, J., Pérez, F. y Rodríguez-Silva, F. (2011): Field Fuel Moisture Measurements on Spanish study sites. Department of Geography, University of Alcalá, Spain. Version 1. Available online at: http://www…
C2_6_3	Chuvieco	AraCin10	Aragon	Spain	42.2937	-0.907666		2001-06-08	2001	11	Tree cover, needleleaved, evergreen, closed to open (>15%)	128.868	1	0.0544405	0.0753405	0.0802154	0.117875	Pinus sylvestris			Chuvieco, E., Yebra, M., Jurdao, S., Aguado, I., Salas, F. J., García, M., Nieto, H., De Santis, A., Cocero, D., Riaño, D., Martínez, S., Zapico, E., Recondo, C., Martínez-Vega, J., Martín, M.P., Riva, J., Pérez, F. y Rodríguez-Silva, F. (2011): Field Fuel Moisture Measurements on Spanish study sites. Department of Geography, University of Alcalá, Spain. Version 1. Available online at: http://www…
C2_6_4	Chuvieco	AraCin10	Aragon	Spain	42.2937	-0.907666		2001-06-08	2001	11	Tree cover, needleleaved, evergreen, closed to open (>15%)	133.25	1	0.0544405	0.0753405	0.0802154	0.117875	Quercus ilex			Chuvieco, E., Yebra, M., Jurdao, S., Aguado, I., Salas, F. J., García, M., Nieto, H., De Santis, A., Cocero, D., Riaño, D., Martínez, S., Zapico, E., Recondo, C., Martínez-Vega, J., Martín, M.P., Riva, J., Pérez, F. y Rodríguez-Silva, F. (2011): Field Fuel Moisture Measurements on Spanish study sites. Department of Geography, University of Alcalá, Spain. Version 1. Available online at: http://www…
C2_6_5	Chuvieco	AraCin10	Aragon	Spain	42.2937	-0.907666		2001-06-24	2001	11	Tree cover, needleleaved, evergreen, closed to open (>15%)	158.006	1	0.0544405	0.0753405	0.0802154	0.117875	Pinus sylvestris			Chuvieco, E., Yebra, M., Jurdao, S., Aguado, I., Salas, F. J., García, M., Nieto, H., De Santis, A., Cocero, D., Riaño, D., Martínez, S., Zapico, E., Recondo, C., Martínez-Vega, J., Martín, M.P., Riva, J., Pérez, F. y Rodríguez-Silva, F. (2011): Field Fuel Moisture Measurements on Spanish study sites. Department of Geography, University of Alcalá, Spain. Version 1. Available online at: http://www…
C2_6_6	Chuvieco	AraCin10	Aragon	Spain	42.2937	-0.907666		2001-06-24	2001	11	Tree cover, needleleaved, evergreen, closed to open (>15%)	106.828	1	0.0544405	0.0753405	0.0802154	0.117875	Quercus ilex			Chuvieco, E., Yebra, M., Jurdao, S., Aguado, I., Salas, F. J., García, M., Nieto, H., De Santis, A., Cocero, D., Riaño, D., Martínez, S., Zapico, E., Recondo, C., Martínez-Vega, J., Martín, M.P., Riva, J., Pérez, F. y Rodríguez-Silva, F. (2011): Field Fuel Moisture Measurements on Spanish study sites. Department of Geography, University of Alcalá, Spain. Version 1. Available online at: http://www…
C2_6_7	Chuvieco	AraCin10	Aragon	Spain	42.2937	-0.907666		2001-07-10	2001	11	Tree cover, needleleaved, evergreen, closed to open (>15%)	146.565	1	0.0544405	0.0753405	0.0802154	0.117875	Pinus sylvestris			Chuvieco, E., Yebra, M., Jurdao, S., Aguado, I., Salas, F. J., García, M., Nieto, H., De Santis, A., Cocero, D., Riaño, D., Martínez, S., Zapico, E., Recondo, C., Martínez-Vega, J., Martín, M.P., Riva, J., Pérez, F. y Rodríguez-Silva, F. (2011): Field Fuel Moisture Measurements on Spanish study sites. Department of Geography, University of Alcalá, Spain. Version 1. Available online at: http://www…
C2_6_8	Chuvieco	AraCin10	Aragon	Spain	42.2937	-0.907666		2001-07-10	2001	11	Tree cover, needleleaved, evergreen, closed to open (>15%)	114.041	1	0.0544405	0.0753405	0.0802154	0.117875	Quercus ilex			Chuvieco, E., Yebra, M., Jurdao, S., Aguado, I., Salas, F. J., García, M., Nieto, H., De Santis, A., Cocero, D., Riaño, D., Martínez, S., Zapico, E., Recondo, C., Martínez-Vega, J., Martín, M.P., Riva, J., Pérez, F. y Rodríguez-Silva, F. (2011): Field Fuel Moisture Measurements on Spanish study sites. Department of Geography, University of Alcalá, Spain. Version 1. Available online at: http://www…
C2_6_9	Chuvieco	AraCin10	Aragon	Spain	42.2937	-0.907666		2001-08-11	2001	11	Tree cover, needleleaved, evergreen, closed to open (>15%)	127.271	1	0.0544405	0.0753405	0.0802154	0.117875	Pinus sylvestris			Chuvieco, E., Yebra, M., Jurdao, S., Aguado, I., Salas, F. J., García, M., Nieto, H., De Santis, A., Cocero, D., Riaño, D., Martínez, S., Zapico, E., Recondo, C., Martínez-Vega, J., Martín, M.P., Riva, J., Pérez, F. y Rodríguez-Silva, F. (2011): Field Fuel Moisture Measurements on Spanish study sites. Department of Geography, University of Alcalá, Spain. Version 1. Available online at: http://www…
C2_6_10	Chuvieco	AraCin10	Aragon	Spain	42.2937	-0.907666		2001-08-11	2001	11	Tree cover, needleleaved, evergreen, closed to open (>15%)	126.29	1	0.0544405	0.0753405	0.0802154	0.117875	Quercus ilex			Chuvieco, E., Yebra, M., Jurdao, S., Aguado, I., Salas, F. J., García, M., Nieto, H., De Santis, A., Cocero, D., Riaño, D., Martínez, S., Zapico, E., Recondo, C., Martínez-Vega, J., Martín, M.P., Riva, J., Pérez, F. y Rodríguez-Silva, F. (2011): Field Fuel Moisture Measurements on Spanish study sites. Department of Geography, University of Alcalá, Spain. Version 1. Available online at: http://www…
C2_6_11	Chuvieco	AraCin10	Aragon	Spain	42.2937	-0.907666		2001-08-27	2001	11	Tree cover, needleleaved, evergreen, closed to open (>15%)	150.116	1	0.0544405	0.0753405	0.0802154	0.117875	Pinus sylvestris			Chuvieco, E., Yebra, M., Jurdao, S., Aguado, I., Salas, F. J., García, M., Nieto, H., De Santis, A., Cocero, D., Riaño, D., Martínez, S., Zapico, E., Recondo, C., Martínez-Vega, J., Martín, M.P., Riva, J., Pérez, F. y Rodríguez-Silva, F. (2011): Field Fuel Moisture Measurements on Spanish study sites. Department of Geography, University of Alcalá, Spain. Version 1. Available online at: http://www…
C2_6_12	Chuvieco	AraCin10	Aragon	Spain	42.2937	-0.907666		2001-08-27	2001	11	Tree cover, needleleaved, evergreen, closed to open (>15%)	98.5642	1	0.0544405	0.0753405	0.0802154	0.117875	Quercus ilex			Chuvieco, E., Yebra, M., Jurdao, S., Aguado, I., Salas, F. J., García, M., Nieto, H., De Santis, A., Cocero, D., Riaño, D., Martínez, S., Zapico, E., Recondo, C., Martínez-Vega, J., Martín, M.P., Riva, J., Pérez, F. y Rodríguez-Silva, F. (2011): Field Fuel Moisture Measurements on Spanish study sites. Department of Geography, University of Alcalá, Spain. Version 1. Available online at: http://www…
C2_6_13	Chuvieco	AraCin10	Aragon	Spain	42.2937	-0.907666		2001-09-12	2001	11	Tree cover, needleleaved, evergreen, closed to open (>15%)	130.034	1	0.0544405	0.0753405	0.0802154	0.117875	Pinus sylvestris			Chuvieco, E., Yebra, M., Jurdao, S., Aguado, I., Salas, F. J., García, M., Nieto, H., De Santis, A., Cocero, D., Riaño, D., Martínez, S., Zapico, E., Recondo, C., Martínez-Vega, J., Martín, M.P., Riva, J., Pérez, F. y Rodríguez-Silva, F. (2011): Field Fuel Moisture Measurements on Spanish study sites. Department of Geography, University of Alcalá, Spain. Version 1. Available online at: http://www…
C2_6_14	Chuvieco	AraCin10	Aragon	Spain	42.2937	-0.907666		2001-09-12	2001	11	Tree cover, needleleaved, evergreen, closed to open (>15%)	83.7413	1	0.0544405	0.0753405	0.0802154	0.117875	Quercus ilex			Chuvieco, E., Yebra, M., Jurdao, S., Aguado, I., Salas, F. J., García, M., Nieto, H., De Santis, A., Cocero, D., Riaño, D., Martínez, S., Zapico, E., Recondo, C., Martínez-Vega, J., Martín, M.P., Riva, J., Pérez, F. y Rodríguez-Silva, F. (2011): Field Fuel Moisture Measurements on Spanish study sites. Department of Geography, University of Alcalá, Spain. Version 1. Available online at: http://www…
C2_6_15	Chuvieco	AraCin10	Aragon	Spain	42.2937	-0.907666		2002-05-23	2002	11	Tree cover, needleleaved, evergreen, closed to open (>15%)	123.323	1	0.0544405	0.0753405	0.0802154	0.117875	Pinus sylvestris			Chuvieco, E., Yebra, M., Jurdao, S., Aguado, I., Salas, F. J., García, M., Nieto, H., De Santis, A., Cocero, D., Riaño, D., Martínez, S., Zapico, E., Recondo, C., Martínez-Vega, J., Martín, M.P., Riva, J., Pérez, F. y Rodríguez-Silva, F. (2011): Field Fuel Moisture Measurements on Spanish study sites. Department of Geography, University of Alcalá, Spain. Version 1. Available online at: http://www…
C2_6_16	Chuvieco	AraCin10	Aragon	Spain	42.2937	-0.907666		2002-05-23	2002	11	Tree cover, needleleaved, evergreen, closed to open (>15%)	174.102	1	0.0544405	0.0753405	0.0802154	0.117875	Quercus ilex			Chuvieco, E., Yebra, M., Jurdao, S., Aguado, I., Salas, F. J., García, M., Nieto, H., De Santis, A., Cocero, D., Riaño, D., Martínez, S., Zapico, E., Recondo, C., Martínez-Vega, J., Martín, M.P., Riva, J., Pérez, F. y Rodríguez-Silva, F. (2011): Field Fuel Moisture Measurements on Spanish study sites. Department of Geography, University of Alcalá, Spain. Version 1. Available online at: http://www…
C2_6_17	Chuvieco	AraCin10	Aragon	Spain	42.2937	-0.907666		2002-06-08	2002	11	Tree cover, needleleaved, evergreen, closed to open (>15%)	128.868	1	0.0544405	0.0753405	0.0802154	0.117875	Pinus sylvestris			Chuvieco, E., Yebra, M., Jurdao, S., Aguado, I., Salas, F. J., García, M., Nieto, H., De Santis, A., Cocero, D., Riaño, D., Martínez, S., Zapico, E., Recondo, C., Martínez-Vega, J., Martín, M.P., Riva, J., Pérez, F. y Rodríguez-Silva, F. (2011): Field Fuel Moisture Measurements on Spanish study sites. Department of Geography, University of Alcalá, Spain. Version 1. Available online at: http://www…
C2_6_18	Chuvieco	AraCin10	Aragon	Spain	42.2937	-0.907666		2002-06-08	2002	11	Tree cover, needleleaved, evergreen, closed to open (>15%)	133.25	1	0.0544405	0.0753405	0.0802154	0.117875	Quercus ilex			Chuvieco, E., Yebra, M., Jurdao, S., Aguado, I., Salas, F. J., García, M., Nieto, H., De Santis, A., Cocero, D., Riaño, D., Martínez, S., Zapico, E., Recondo, C., Martínez-Vega, J., Martín, M.P., Riva, J., Pérez, F. y Rodríguez-Silva, F. (2011): Field Fuel Moisture Measurements on Spanish study sites. Department of Geography, University of Alcalá, Spain. Version 1. Available online at: http://www…
C2_6_19	Chuvieco	AraCin10	Aragon	Spain	42.2937	-0.907666		2002-06-24	2002	11	Tree cover, needleleaved, evergreen, closed to open (>15%)	158.006	1	0.0544405	0.0753405	0.0802154	0.117875	Pinus sylvestris			Chuvieco, E., Yebra, M., Jurdao, S., Aguado, I., Salas, F. J., García, M., Nieto, H., De Santis, A., Cocero, D., Riaño, D., Martínez, S., Zapico, E., Recondo, C., Martínez-Vega, J., Martín, M.P., Riva, J., Pérez, F. y Rodríguez-Silva, F. (2011): Field Fuel Moisture Measurements on Spanish study sites. Department of Geography, University of Alcalá, Spain. Version 1. Available online at: http://www…
C2_6_20	Chuvieco	AraCin10	Aragon	Spain	42.2937	-0.907666		2002-06-24	2002	11	Tree cover, needleleaved, evergreen, closed to open (>15%)	106.828	1	0.0544405	0.0753405	0.0802154	0.117875	Quercus ilex			Chuvieco, E., Yebra, M., Jurdao, S., Aguado, I., Salas, F. J., García, M., Nieto, H., De Santis, A., Cocero, D., Riaño, D., Martínez, S., Zapico, E., Recondo, C., Martínez-Vega, J., Martín, M.P., Riva, J., Pérez, F. y Rodríguez-Silva, F. (2011): Field Fuel Moisture Measurements on Spanish study sites. Department of Geography, University of Alcalá, Spain. Version 1. Available online at: http://www…
C2_6_21	Chuvieco	AraCin10	Aragon	Spain	42.2937	-0.907666		2002-07-10	2002	11	Tree cover, needleleaved, evergreen, closed to open (>15%)	146.565	1	0.0544405	0.0753405	0.0802154	0.117875	Pinus sylvestris			Chuvieco, E., Yebra, M., Jurdao, S., Aguado, I., Salas, F. J., García, M., Nieto, H., De Santis, A., Cocero, D., Riaño, D., Martínez, S., Zapico, E., Recondo, C., Martínez-Vega, J., Martín, M.P., Riva, J., Pérez, F. y Rodríguez-Silva, F. (2011): Field Fuel Moisture Measurements on Spanish study sites. Department of Geography, University of Alcalá, Spain. Version 1. Available online at: http://www…
C2_6_22	Chuvieco	AraCin10	Aragon	Spain	42.2937	-0.907666		2002-07-10	2002	11	Tree cover, needleleaved, evergreen, closed to open (>15%)	114.041	1	0.0544405	0.0753405	0.0802154	0.117875	Quercus ilex			Chuvieco, E., Yebra, M., Jurdao, S., Aguado, I., Salas, F. J., García, M., Nieto, H., De Santis, A., Cocero, D., Riaño, D., Martínez, S., Zapico, E., Recondo, C., Martínez-Vega, J., Martín, M.P., Riva, J., Pérez, F. y Rodríguez-Silva, F. (2011): Field Fuel Moisture Measurements on Spanish study sites. Department of Geography, University of Alcalá, Spain. Version 1. Available online at: http://www…
C2_6_23	Chuvieco	AraCin10	Aragon	Spain	42.2937	-0.907666		2002-08-11	2002	11	Tree cover, needleleaved, evergreen, closed to open (>15%)	127.271	1	0.0544405	0.0753405	0.0802154	0.117875	Pinus sylvestris			Chuvieco, E., Yebra, M., Jurdao, S., Aguado, I., Salas, F. J., García, M., Nieto, H., De Santis, A., Cocero, D., Riaño, D., Martínez, S., Zapico, E., Recondo, C., Martínez-Vega, J., Martín, M.P., Riva, J., Pérez, F. y Rodríguez-Silva, F. (2011): Field Fuel Moisture Measurements on Spanish study sites. Department of Geography, University of Alcalá, Spain. Version 1. Available online at: http://www…
C2_6_24	Chuvieco	AraCin10	Aragon	Spain	42.2937	-0.907666		2002-08-11	2002	11	Tree cover, needleleaved, evergreen, closed to open (>15%)	126.29	1	0.0544405	0.0753405	0.0802154	0.117875	Quercus ilex			Chuvieco, E., Yebra, M., Jurdao, S., Aguado, I., Salas, F. J., García, M., Nieto, H., De Santis, A., Cocero, D., Riaño, D., Martínez, S., Zapico, E., Recondo, C., Martínez-Vega, J., Martín, M.P., Riva, J., Pérez, F. y Rodríguez-Silva, F. (2011): Field Fuel Moisture Measurements on Spanish study sites. Department of Geography, University of Alcalá, Spain. Version 1. Available online at: http://www…
C2_6_25	Chuvieco	AraCin10	Aragon	Spain	42.2937	-0.907666		2002-08-27	2002	11	Tree cover, needleleaved, evergreen, closed to open (>15%)	150.116	1	0.0544405	0.0753405	0.0802154	0.117875	Pinus sylvestris			Chuvieco, E., Yebra, M., Jurdao, S., Aguado, I., Salas, F. J., García, M., Nieto, H., De Santis, A., Cocero, D., Riaño, D., Martínez, S., Zapico, E., Recondo, C., Martínez-Vega, J., Martín, M.P., Riva, J., Pérez, F. y Rodríguez-Silva, F. (2011): Field Fuel Moisture Measurements on Spanish study sites. Department of Geography, University of Alcalá, Spain. Version 1. Available online at: http://www…
C2_6_26	Chuvieco	AraCin10	Aragon	Spain	42.2937	-0.907666		2002-08-27	2002	11	Tree cover, needleleaved, evergreen, closed to open (>15%)	98.5642	1	0.0544405	0.0753405	0.0802154	0.117875	Quercus ilex			Chuvieco, E., Yebra, M., Jurdao, S., Aguado, I., Salas, F. J., García, M., Nieto, H., De Santis, A., Cocero, D., Riaño, D., Martínez, S., Zapico, E., Recondo, C., Martínez-Vega, J., Martín, M.P., Riva, J., Pérez, F. y Rodríguez-Silva, F. (2011): Field Fuel Moisture Measurements on Spanish study sites. Department of Geography, University of Alcalá, Spain. Version 1. Available online at: http://www…
C2_6_27	Chuvieco	AraCin10	Aragon	Spain	42.2937	-0.907666		2002-09-12	2002	11	Tree cover, needleleaved, evergreen, closed to open (>15%)	130.034	1	0.0544405	0.0753405	0.0802154	0.117875	Pinus sylvestris			Chuvieco, E., Yebra, M., Jurdao, S., Aguado, I., Salas, F. J., García, M., Nieto, H., De Santis, A., Cocero, D., Riaño, D., Martínez, S., Zapico, E., Recondo, C., Martínez-Vega, J., Martín, M.P., Riva, J., Pérez, F. y Rodríguez-Silva, F. (2011): Field Fuel Moisture Measurements on Spanish study sites. Department of Geography, University of Alcalá, Spain. Version 1. Available online at: http://www…
C2_6_28	Chuvieco	AraCin10	Aragon	Spain	42.2937	-0.907666		2002-09-12	2002	11	Tree cover, needleleaved, evergreen, closed to open (>15%)	83.7413	1	0.0544405	0.0753405	0.0802154	0.117875	Quercus ilex			Chuvieco, E., Yebra, M., Jurdao, S., Aguado, I., Salas, F. J., García, M., Nieto, H., De Santis, A., Cocero, D., Riaño, D., Martínez, S., Zapico, E., Recondo, C., Martínez-Vega, J., Martín, M.P., Riva, J., Pérez, F. y Rodríguez-Silva, F. (2011): Field Fuel Moisture Measurements on Spanish study sites. Department of Geography, University of Alcalá, Spain. Version 1. Available online at: http://www…
C2_7_1	Chuvieco	AraCin11	Aragon	Spain	42.2844	-0.89582		2001-05-24	2001	11	Tree cover, needleleaved, evergreen, closed to open (>15%)	108.338	1	0.0584806	0.120491	0.0854462	0.160349	Pinus halepensis			Chuvieco, E., Yebra, M., Jurdao, S., Aguado, I., Salas, F. J., García, M., Nieto, H., De Santis, A., Cocero, D., Riaño, D., Martínez, S., Zapico, E., Recondo, C., Martínez-Vega, J., Martín, M.P., Riva, J., Pérez, F. y Rodríguez-Silva, F. (2011): Field Fuel Moisture Measurements on Spanish study sites. Department of Geography, University of Alcalá, Spain. Version 1. Available online at: http://www…
C2_7_2	Chuvieco	AraCin11	Aragon	Spain	42.2844	-0.89582		2001-05-24	2001	11	Tree cover, needleleaved, evergreen, closed to open (>15%)	115.832	1	0.0584806	0.120491	0.0854462	0.160349	Juniperus communis			Chuvieco, E., Yebra, M., Jurdao, S., Aguado, I., Salas, F. J., García, M., Nieto, H., De Santis, A., Cocero, D., Riaño, D., Martínez, S., Zapico, E., Recondo, C., Martínez-Vega, J., Martín, M.P., Riva, J., Pérez, F. y Rodríguez-Silva, F. (2011): Field Fuel Moisture Measurements on Spanish study sites. Department of Geography, University of Alcalá, Spain. Version 1. Available online at: http://www…
C2_7_3	Chuvieco	AraCin11	Aragon	Spain	42.2844	-0.89582		2001-05-24	2001	11	Tree cover, needleleaved, evergreen, closed to open (>15%)	92.6529	1	0.0584806	0.120491	0.0854462	0.160349	Quercus coccifera			Chuvieco, E., Yebra, M., Jurdao, S., Aguado, I., Salas, F. J., García, M., Nieto, H., De Santis, A., Cocero, D., Riaño, D., Martínez, S., Zapico, E., Recondo, C., Martínez-Vega, J., Martín, M.P., Riva, J., Pérez, F. y Rodríguez-Silva, F. (2011): Field Fuel Moisture Measurements on Spanish study sites. Department of Geography, University of Alcalá, Spain. Version 1. Available online at: http://www…
C2_7_4	Chuvieco	AraCin11	Aragon	Spain	42.2844	-0.89582		2001-05-24	2001	11	Tree cover, needleleaved, evergreen, closed to open (>15%)	100.513	1	0.0584806	0.120491	0.0854462	0.160349	Buxus sempervirens			Chuvieco, E., Yebra, M., Jurdao, S., Aguado, I., Salas, F. J., García, M., Nieto, H., De Santis, A., Cocero, D., Riaño, D., Martínez, S., Zapico, E., Recondo, C., Martínez-Vega, J., Martín, M.P., Riva, J., Pérez, F. y Rodríguez-Silva, F. (2011): Field Fuel Moisture Measurements on Spanish study sites. Department of Geography, University of Alcalá, Spain. Version 1. Available online at: http://www…
C2_7_5	Chuvieco	AraCin11	Aragon	Spain	42.2844	-0.89582		2001-06-08	2001	11	Tree cover, needleleaved, evergreen, closed to open (>15%)	105.854	1	0.0584806	0.120491	0.0854462	0.160349	Pinus halepensis			Chuvieco, E., Yebra, M., Jurdao, S., Aguado, I., Salas, F. J., García, M., Nieto, H., De Santis, A., Cocero, D., Riaño, D., Martínez, S., Zapico, E., Recondo, C., Martínez-Vega, J., Martín, M.P., Riva, J., Pérez, F. y Rodríguez-Silva, F. (2011): Field Fuel Moisture Measurements on Spanish study sites. Department of Geography, University of Alcalá, Spain. Version 1. Available online at: http://www…
C2_7_6	Chuvieco	AraCin11	Aragon	Spain	42.2844	-0.89582		2001-06-08	2001	11	Tree cover, needleleaved, evergreen, closed to open (>15%)	139.461	1	0.0584806	0.120491	0.0854462	0.160349	Juniperus communis			Chuvieco, E., Yebra, M., Jurdao, S., Aguado, I., Salas, F. J., García, M., Nieto, H., De Santis, A., Cocero, D., Riaño, D., Martínez, S., Zapico, E., Recondo, C., Martínez-Vega, J., Martín, M.P., Riva, J., Pérez, F. y Rodríguez-Silva, F. (2011): Field Fuel Moisture Measurements on Spanish study sites. Department of Geography, University of Alcalá, Spain. Version 1. Available online at: http://www…
C2_7_7	Chuvieco	AraCin11	Aragon	Spain	42.2844	-0.89582		2001-06-08	2001	11	Tree cover, needleleaved, evergreen, closed to open (>15%)	124.565	1	0.0584806	0.120491	0.0854462	0.160349	Quercus coccifera			Chuvieco, E., Yebra, M., Jurdao, S., Aguado, I., Salas, F. J., García, M., Nieto, H., De Santis, A., Cocero, D., Riaño, D., Martínez, S., Zapico, E., Recondo, C., Martínez-Vega, J., Martín, M.P., Riva, J., Pérez, F. y Rodríguez-Silva, F. (2011): Field Fuel Moisture Measurements on Spanish study sites. Department of Geography, University of Alcalá, Spain. Version 1. Available online at: http://www…
C2_7_8	Chuvieco	AraCin11	Aragon	Spain	42.2844	-0.89582		2001-06-08	2001	11	Tree cover, needleleaved, evergreen, closed to open (>15%)	104.005	1	0.0584806	0.120491	0.0854462	0.160349	Buxus sempervirens			Chuvieco, E., Yebra, M., Jurdao, S., Aguado, I., Salas, F. J., García, M., Nieto, H., De Santis, A., Cocero, D., Riaño, D., Martínez, S., Zapico, E., Recondo, C., Martínez-Vega, J., Martín, M.P., Riva, J., Pérez, F. y Rodríguez-Silva, F. (2011): Field Fuel Moisture Measurements on Spanish study sites. Department of Geography, University of Alcalá, Spain. Version 1. Available online at: http://www…
C2_7_9	Chuvieco	AraCin11	Aragon	Spain	42.2844	-0.89582		2001-06-24	2001	11	Tree cover, needleleaved, evergreen, closed to open (>15%)	101.491	1	0.0584806	0.120491	0.0854462	0.160349	Pinus halepensis			Chuvieco, E., Yebra, M., Jurdao, S., Aguado, I., Salas, F. J., García, M., Nieto, H., De Santis, A., Cocero, D., Riaño, D., Martínez, S., Zapico, E., Recondo, C., Martínez-Vega, J., Martín, M.P., Riva, J., Pérez, F. y Rodríguez-Silva, F. (2011): Field Fuel Moisture Measurements on Spanish study sites. Department of Geography, University of Alcalá, Spain. Version 1. Available online at: http://www…
C2_7_10	Chuvieco	AraCin11	Aragon	Spain	42.2844	-0.89582		2001-06-24	2001	11	Tree cover, needleleaved, evergreen, closed to open (>15%)	114.944	1	0.0584806	0.120491	0.0854462	0.160349	Juniperus communis			Chuvieco, E., Yebra, M., Jurdao, S., Aguado, I., Salas, F. J., García, M., Nieto, H., De Santis, A., Cocero, D., Riaño, D., Martínez, S., Zapico, E., Recondo, C., Martínez-Vega, J., Martín, M.P., Riva, J., Pérez, F. y Rodríguez-Silva, F. (2011): Field Fuel Moisture Measurements on Spanish study sites. Department of Geography, University of Alcalá, Spain. Version 1. Available online at: http://www…
C2_7_11	Chuvieco	AraCin11	Aragon	Spain	42.2844	-0.89582		2001-06-24	2001	11	Tree cover, needleleaved, evergreen, closed to open (>15%)	89.6131	1	0.0584806	0.120491	0.0854462	0.160349	Quercus coccifera			Chuvieco, E., Yebra, M., Jurdao, S., Aguado, I., Salas, F. J., García, M., Nieto, H., De Santis, A., Cocero, D., Riaño, D., Martínez, S., Zapico, E., Recondo, C., Martínez-Vega, J., Martín, M.P., Riva, J., Pérez, F. y Rodríguez-Silva, F. (2011): Field Fuel Moisture Measurements on Spanish study sites. Department of Geography, University of Alcalá, Spain. Version 1. Available online at: http://www…
C2_7_12	Chuvieco	AraCin11	Aragon	Spain	42.2844	-0.89582		2001-06-24	2001	11	Tree cover, needleleaved, evergreen, closed to open (>15%)	105.734	1	0.0584806	0.120491	0.0854462	0.160349	Buxus sempervirens			Chuvieco, E., Yebra, M., Jurdao, S., Aguado, I., Salas, F. J., García, M., Nieto, H., De Santis, A., Cocero, D., Riaño, D., Martínez, S., Zapico, E., Recondo, C., Martínez-Vega, J., Martín, M.P., Riva, J., Pérez, F. y Rodríguez-Silva, F. (2011): Field Fuel Moisture Measurements on Spanish study sites. Department of Geography, University of Alcalá, Spain. Version 1. Available online at: http://www…
C2_7_13	Chuvieco	AraCin11	Aragon	Spain	42.2844	-0.89582		2001-07-10	2001	11	Tree cover, needleleaved, evergreen, closed to open (>15%)	117.309	1	0.0584806	0.120491	0.0854462	0.160349	Pinus halepensis			Chuvieco, E., Yebra, M., Jurdao, S., Aguado, I., Salas, F. J., García, M., Nieto, H., De Santis, A., Cocero, D., Riaño, D., Martínez, S., Zapico, E., Recondo, C., Martínez-Vega, J., Martín, M.P., Riva, J., Pérez, F. y Rodríguez-Silva, F. (2011): Field Fuel Moisture Measurements on Spanish study sites. Department of Geography, University of Alcalá, Spain. Version 1. Available online at: http://www…
C2_7_14	Chuvieco	AraCin11	Aragon	Spain	42.2844	-0.89582		2001-07-10	2001	11	Tree cover, needleleaved, evergreen, closed to open (>15%)	99.3143	1	0.0584806	0.120491	0.0854462	0.160349	Juniperus communis			Chuvieco, E., Yebra, M., Jurdao, S., Aguado, I., Salas, F. J., García, M., Nieto, H., De Santis, A., Cocero, D., Riaño, D., Martínez, S., Zapico, E., Recondo, C., Martínez-Vega, J., Martín, M.P., Riva, J., Pérez, F. y Rodríguez-Silva, F. (2011): Field Fuel Moisture Measurements on Spanish study sites. Department of Geography, University of Alcalá, Spain. Version 1. Available online at: http://www…
C2_7_15	Chuvieco	AraCin11	Aragon	Spain	42.2844	-0.89582		2001-07-10	2001	11	Tree cover, needleleaved, evergreen, closed to open (>15%)	88.7701	1	0.0584806	0.120491	0.0854462	0.160349	Quercus coccifera			Chuvieco, E., Yebra, M., Jurdao, S., Aguado, I., Salas, F. J., García, M., Nieto, H., De Santis, A., Cocero, D., Riaño, D., Martínez, S., Zapico, E., Recondo, C., Martínez-Vega, J., Martín, M.P., Riva, J., Pérez, F. y Rodríguez-Silva, F. (2011): Field Fuel Moisture Measurements on Spanish study sites. Department of Geography, University of Alcalá, Spain. Version 1. Available online at: http://www…
C2_7_16	Chuvieco	AraCin11	Aragon	Spain	42.2844	-0.89582		2001-07-10	2001	11	Tree cover, needleleaved, evergreen, closed to open (>15%)	111.338	1	0.0584806	0.120491	0.0854462	0.160349	Buxus sempervirens			Chuvieco, E., Yebra, M., Jurdao, S., Aguado, I., Salas, F. J., García, M., Nieto, H., De Santis, A., Cocero, D., Riaño, D., Martínez, S., Zapico, E., Recondo, C., Martínez-Vega, J., Martín, M.P., Riva, J., Pérez, F. y Rodríguez-Silva, F. (2011): Field Fuel Moisture Measurements on Spanish study sites. Department of Geography, University of Alcalá, Spain. Version 1. Available online at: http://www…
C2_7_17	Chuvieco	AraCin11	Aragon	Spain	42.2844	-0.89582		2001-08-11	2001	11	Tree cover, needleleaved, evergreen, closed to open (>15%)	118.88	1	0.0584806	0.120491	0.0854462	0.160349	Pinus halepensis			Chuvieco, E., Yebra, M., Jurdao, S., Aguado, I., Salas, F. J., García, M., Nieto, H., De Santis, A., Cocero, D., Riaño, D., Martínez, S., Zapico, E., Recondo, C., Martínez-Vega, J., Martín, M.P., Riva, J., Pérez, F. y Rodríguez-Silva, F. (2011): Field Fuel Moisture Measurements on Spanish study sites. Department of Geography, University of Alcalá, Spain. Version 1. Available online at: http://www…
C2_7_18	Chuvieco	AraCin11	Aragon	Spain	42.2844	-0.89582		2001-08-11	2001	11	Tree cover, needleleaved, evergreen, closed to open (>15%)	88.3955	1	0.0584806	0.120491	0.0854462	0.160349	Juniperus communis			Chuvieco, E., Yebra, M., Jurdao, S., Aguado, I., Salas, F. J., García, M., Nieto, H., De Santis, A., Cocero, D., Riaño, D., Martínez, S., Zapico, E., Recondo, C., Martínez-Vega, J., Martín, M.P., Riva, J., Pérez, F. y Rodríguez-Silva, F. (2011): Field Fuel Moisture Measurements on Spanish study sites. Department of Geography, University of Alcalá, Spain. Version 1. Available online at: http://www…
C2_7_19	Chuvieco	AraCin11	Aragon	Spain	42.2844	-0.89582		2001-08-11	2001	11	Tree cover, needleleaved, evergreen, closed to open (>15%)	75.8533	1	0.0584806	0.120491	0.0854462	0.160349	Quercus coccifera			Chuvieco, E., Yebra, M., Jurdao, S., Aguado, I., Salas, F. J., García, M., Nieto, H., De Santis, A., Cocero, D., Riaño, D., Martínez, S., Zapico, E., Recondo, C., Martínez-Vega, J., Martín, M.P., Riva, J., Pérez, F. y Rodríguez-Silva, F. (2011): Field Fuel Moisture Measurements on Spanish study sites. Department of Geography, University of Alcalá, Spain. Version 1. Available online at: http://www…
C2_7_20	Chuvieco	AraCin11	Aragon	Spain	42.2844	-0.89582		2001-08-27	2001	11	Tree cover, needleleaved, evergreen, closed to open (>15%)	125.579	1	0.0584806	0.120491	0.0854462	0.160349	Pinus halepensis			Chuvieco, E., Yebra, M., Jurdao, S., Aguado, I., Salas, F. J., García, M., Nieto, H., De Santis, A., Cocero, D., Riaño, D., Martínez, S., Zapico, E., Recondo, C., Martínez-Vega, J., Martín, M.P., Riva, J., Pérez, F. y Rodríguez-Silva, F. (2011): Field Fuel Moisture Measurements on Spanish study sites. Department of Geography, University of Alcalá, Spain. Version 1. Available online at: http://www…
C2_7_21	Chuvieco	AraCin11	Aragon	Spain	42.2844	-0.89582		2001-08-27	2001	11	Tree cover, needleleaved, evergreen, closed to open (>15%)	83.7562	1	0.0584806	0.120491	0.0854462	0.160349	Juniperus communis			Chuvieco, E., Yebra, M., Jurdao, S., Aguado, I., Salas, F. J., García, M., Nieto, H., De Santis, A., Cocero, D., Riaño, D., Martínez, S., Zapico, E., Recondo, C., Martínez-Vega, J., Martín, M.P., Riva, J., Pérez, F. y Rodríguez-Silva, F. (2011): Field Fuel Moisture Measurements on Spanish study sites. Department of Geography, University of Alcalá, Spain. Version 1. Available online at: http://www…
C2_7_22	Chuvieco	AraCin11	Aragon	Spain	42.2844	-0.89582		2001-08-27	2001	11	Tree cover, needleleaved, evergreen, closed to open (>15%)	78.9912	1	0.0584806	0.120491	0.0854462	0.160349	Quercus coccifera			Chuvieco, E., Yebra, M., Jurdao, S., Aguado, I., Salas, F. J., García, M., Nieto, H., De Santis, A., Cocero, D., Riaño, D., Martínez, S., Zapico, E., Recondo, C., Martínez-Vega, J., Martín, M.P., Riva, J., Pérez, F. y Rodríguez-Silva, F. (2011): Field Fuel Moisture Measurements on Spanish study sites. Department of Geography, University of Alcalá, Spain. Version 1. Available online at: http://www…
C2_7_23	Chuvieco	AraCin11	Aragon	Spain	42.2844	-0.89582		2001-08-27	2001	11	Tree cover, needleleaved, evergreen, closed to open (>15%)	98.8656	1	0.0584806	0.120491	0.0854462	0.160349	Buxus sempervirens			Chuvieco, E., Yebra, M., Jurdao, S., Aguado, I., Salas, F. J., García, M., Nieto, H., De Santis, A., Cocero, D., Riaño, D., Martínez, S., Zapico, E., Recondo, C., Martínez-Vega, J., Martín, M.P., Riva, J., Pérez, F. y Rodríguez-Silva, F. (2011): Field Fuel Moisture Measurements on Spanish study sites. Department of Geography, University of Alcalá, Spain. Version 1. Available online at: http://www…
C2_7_24	Chuvieco	AraCin11	Aragon	Spain	42.2844	-0.89582		2001-09-12	2001	11	Tree cover, needleleaved, evergreen, closed to open (>15%)	111.801	1	0.0584806	0.120491	0.0854462	0.160349	Pinus halepensis			Chuvieco, E., Yebra, M., Jurdao, S., Aguado, I., Salas, F. J., García, M., Nieto, H., De Santis, A., Cocero, D., Riaño, D., Martínez, S., Zapico, E., Recondo, C., Martínez-Vega, J., Martín, M.P., Riva, J., Pérez, F. y Rodríguez-Silva, F. (2011): Field Fuel Moisture Measurements on Spanish study sites. Department of Geography, University of Alcalá, Spain. Version 1. Available online at: http://www…
C2_7_25	Chuvieco	AraCin11	Aragon	Spain	42.2844	-0.89582		2001-09-12	2001	11	Tree cover, needleleaved, evergreen, closed to open (>15%)	70.3185	1	0.0584806	0.120491	0.0854462	0.160349	Juniperus communis			Chuvieco, E., Yebra, M., Jurdao, S., Aguado, I., Salas, F. J., García, M., Nieto, H., De Santis, A., Cocero, D., Riaño, D., Martínez, S., Zapico, E., Recondo, C., Martínez-Vega, J., Martín, M.P., Riva, J., Pérez, F. y Rodríguez-Silva, F. (2011): Field Fuel Moisture Measurements on Spanish study sites. Department of Geography, University of Alcalá, Spain. Version 1. Available online at: http://www…
C2_7_26	Chuvieco	AraCin11	Aragon	Spain	42.2844	-0.89582		2001-09-12	2001	11	Tree cover, needleleaved, evergreen, closed to open (>15%)	75.4893	1	0.0584806	0.120491	0.0854462	0.160349	Quercus coccifera			Chuvieco, E., Yebra, M., Jurdao, S., Aguado, I., Salas, F. J., García, M., Nieto, H., De Santis, A., Cocero, D., Riaño, D., Martínez, S., Zapico, E., Recondo, C., Martínez-Vega, J., Martín, M.P., Riva, J., Pérez, F. y Rodríguez-Silva, F. (2011): Field Fuel Moisture Measurements on Spanish study sites. Department of Geography, University of Alcalá, Spain. Version 1. Available online at: http://www…
C2_7_27	Chuvieco	AraCin11	Aragon	Spain	42.2844	-0.89582		2001-09-12	2001	11	Tree cover, needleleaved, evergreen, closed to open (>15%)	74.0602	1	0.0584806	0.120491	0.0854462	0.160349	Buxus sempervirens			Chuvieco, E., Yebra, M., Jurdao, S., Aguado, I., Salas, F. J., García, M., Nieto, H., De Santis, A., Cocero, D., Riaño, D., Martínez, S., Zapico, E., Recondo, C., Martínez-Vega, J., Martín, M.P., Riva, J., Pérez, F. y Rodríguez-Silva, F. (2011): Field Fuel Moisture Measurements on Spanish study sites. Department of Geography, University of Alcalá, Spain. Version 1. Available online at: http://www…
C2_7_28	Chuvieco	AraCin11	Aragon	Spain	42.2844	-0.89582		2002-05-23	2002	11	Tree cover, needleleaved, evergreen, closed to open (>15%)	108.338	1	0.0584806	0.120491	0.0854462	0.160349	Pinus halepensis			Chuvieco, E., Yebra, M., Jurdao, S., Aguado, I., Salas, F. J., García, M., Nieto, H., De Santis, A., Cocero, D., Riaño, D., Martínez, S., Zapico, E., Recondo, C., Martínez-Vega, J., Martín, M.P., Riva, J., Pérez, F. y Rodríguez-Silva, F. (2011): Field Fuel Moisture Measurements on Spanish study sites. Department of Geography, University of Alcalá, Spain. Version 1. Available online at: http://www…
C2_7_29	Chuvieco	AraCin11	Aragon	Spain	42.2844	-0.89582		2002-05-23	2002	11	Tree cover, needleleaved, evergreen, closed to open (>15%)	115.832	1	0.0584806	0.120491	0.0854462	0.160349	Juniperus communis			Chuvieco, E., Yebra, M., Jurdao, S., Aguado, I., Salas, F. J., García, M., Nieto, H., De Santis, A., Cocero, D., Riaño, D., Martínez, S., Zapico, E., Recondo, C., Martínez-Vega, J., Martín, M.P., Riva, J., Pérez, F. y Rodríguez-Silva, F. (2011): Field Fuel Moisture Measurements on Spanish study sites. Department of Geography, University of Alcalá, Spain. Version 1. Available online at: http://www…
C2_7_30	Chuvieco	AraCin11	Aragon	Spain	42.2844	-0.89582		2002-05-23	2002	11	Tree cover, needleleaved, evergreen, closed to open (>15%)	92.6529	1	0.0584806	0.120491	0.0854462	0.160349	Quercus coccifera			Chuvieco, E., Yebra, M., Jurdao, S., Aguado, I., Salas, F. J., García, M., Nieto, H., De Santis, A., Cocero, D., Riaño, D., Martínez, S., Zapico, E., Recondo, C., Martínez-Vega, J., Martín, M.P., Riva, J., Pérez, F. y Rodríguez-Silva, F. (2011): Field Fuel Moisture Measurements on Spanish study sites. Department of Geography, University of Alcalá, Spain. Version 1. Available online at: http://www…
C2_7_31	Chuvieco	AraCin11	Aragon	Spain	42.2844	-0.89582		2002-05-23	2002	11	Tree cover, needleleaved, evergreen, closed to open (>15%)	100.513	1	0.0584806	0.120491	0.0854462	0.160349	Buxus sempervirens			Chuvieco, E., Yebra, M., Jurdao, S., Aguado, I., Salas, F. J., García, M., Nieto, H., De Santis, A., Cocero, D., Riaño, D., Martínez, S., Zapico, E., Recondo, C., Martínez-Vega, J., Martín, M.P., Riva, J., Pérez, F. y Rodríguez-Silva, F. (2011): Field Fuel Moisture Measurements on Spanish study sites. Department of Geography, University of Alcalá, Spain. Version 1. Available online at: http://www…
C2_7_32	Chuvieco	AraCin11	Aragon	Spain	42.2844	-0.89582		2002-06-08	2002	11	Tree cover, needleleaved, evergreen, closed to open (>15%)	105.854	1	0.0584806	0.120491	0.0854462	0.160349	Pinus halepensis			Chuvieco, E., Yebra, M., Jurdao, S., Aguado, I., Salas, F. J., García, M., Nieto, H., De Santis, A., Cocero, D., Riaño, D., Martínez, S., Zapico, E., Recondo, C., Martínez-Vega, J., Martín, M.P., Riva, J., Pérez, F. y Rodríguez-Silva, F. (2011): Field Fuel Moisture Measurements on Spanish study sites. Department of Geography, University of Alcalá, Spain. Version 1. Available online at: http://www…
C2_7_33	Chuvieco	AraCin11	Aragon	Spain	42.2844	-0.89582		2002-06-08	2002	11	Tree cover, needleleaved, evergreen, closed to open (>15%)	139.461	1	0.0584806	0.120491	0.0854462	0.160349	Juniperus communis			Chuvieco, E., Yebra, M., Jurdao, S., Aguado, I., Salas, F. J., García, M., Nieto, H., De Santis, A., Cocero, D., Riaño, D., Martínez, S., Zapico, E., Recondo, C., Martínez-Vega, J., Martín, M.P., Riva, J., Pérez, F. y Rodríguez-Silva, F. (2011): Field Fuel Moisture Measurements on Spanish study sites. Department of Geography, University of Alcalá, Spain. Version 1. Available online at: http://www…
C2_7_34	Chuvieco	AraCin11	Aragon	Spain	42.2844	-0.89582		2002-06-08	2002	11	Tree cover, needleleaved, evergreen, closed to open (>15%)	124.565	1	0.0584806	0.120491	0.0854462	0.160349	Quercus coccifera			Chuvieco, E., Yebra, M., Jurdao, S., Aguado, I., Salas, F. J., García, M., Nieto, H., De Santis, A., Cocero, D., Riaño, D., Martínez, S., Zapico, E., Recondo, C., Martínez-Vega, J., Martín, M.P., Riva, J., Pérez, F. y Rodríguez-Silva, F. (2011): Field Fuel Moisture Measurements on Spanish study sites. Department of Geography, University of Alcalá, Spain. Version 1. Available online at: http://www…
C2_7_35	Chuvieco	AraCin11	Aragon	Spain	42.2844	-0.89582		2002-06-08	2002	11	Tree cover, needleleaved, evergreen, closed to open (>15%)	104.005	1	0.0584806	0.120491	0.0854462	0.160349	Buxus sempervirens			Chuvieco, E., Yebra, M., Jurdao, S., Aguado, I., Salas, F. J., García, M., Nieto, H., De Santis, A., Cocero, D., Riaño, D., Martínez, S., Zapico, E., Recondo, C., Martínez-Vega, J., Martín, M.P., Riva, J., Pérez, F. y Rodríguez-Silva, F. (2011): Field Fuel Moisture Measurements on Spanish study sites. Department of Geography, University of Alcalá, Spain. Version 1. Available online at: http://www…
C2_7_36	Chuvieco	AraCin11	Aragon	Spain	42.2844	-0.89582		2002-06-24	2002	11	Tree cover, needleleaved, evergreen, closed to open (>15%)	101.491	1	0.0584806	0.120491	0.0854462	0.160349	Pinus halepensis			Chuvieco, E., Yebra, M., Jurdao, S., Aguado, I., Salas, F. J., García, M., Nieto, H., De Santis, A., Cocero, D., Riaño, D., Martínez, S., Zapico, E., Recondo, C., Martínez-Vega, J., Martín, M.P., Riva, J., Pérez, F. y Rodríguez-Silva, F. (2011): Field Fuel Moisture Measurements on Spanish study sites. Department of Geography, University of Alcalá, Spain. Version 1. Available online at: http://www…
C2_7_37	Chuvieco	AraCin11	Aragon	Spain	42.2844	-0.89582		2002-06-24	2002	11	Tree cover, needleleaved, evergreen, closed to open (>15%)	114.944	1	0.0584806	0.120491	0.0854462	0.160349	Juniperus communis			Chuvieco, E., Yebra, M., Jurdao, S., Aguado, I., Salas, F. J., García, M., Nieto, H., De Santis, A., Cocero, D., Riaño, D., Martínez, S., Zapico, E., Recondo, C., Martínez-Vega, J., Martín, M.P., Riva, J., Pérez, F. y Rodríguez-Silva, F. (2011): Field Fuel Moisture Measurements on Spanish study sites. Department of Geography, University of Alcalá, Spain. Version 1. Available online at: http://www…
C2_7_38	Chuvieco	AraCin11	Aragon	Spain	42.2844	-0.89582		2002-06-24	2002	11	Tree cover, needleleaved, evergreen, closed to open (>15%)	89.6131	1	0.0584806	0.120491	0.0854462	0.160349	Quercus coccifera			Chuvieco, E., Yebra, M., Jurdao, S., Aguado, I., Salas, F. J., García, M., Nieto, H., De Santis, A., Cocero, D., Riaño, D., Martínez, S., Zapico, E., Recondo, C., Martínez-Vega, J., Martín, M.P., Riva, J., Pérez, F. y Rodríguez-Silva, F. (2011): Field Fuel Moisture Measurements on Spanish study sites. Department of Geography, University of Alcalá, Spain. Version 1. Available online at: http://www…
C2_7_39	Chuvieco	AraCin11	Aragon	Spain	42.2844	-0.89582		2002-06-24	2002	11	Tree cover, needleleaved, evergreen, closed to open (>15%)	105.734	1	0.0584806	0.120491	0.0854462	0.160349	Buxus sempervirens			Chuvieco, E., Yebra, M., Jurdao, S., Aguado, I., Salas, F. J., García, M., Nieto, H., De Santis, A., Cocero, D., Riaño, D., Martínez, S., Zapico, E., Recondo, C., Martínez-Vega, J., Martín, M.P., Riva, J., Pérez, F. y Rodríguez-Silva, F. (2011): Field Fuel Moisture Measurements on Spanish study sites. Department of Geography, University of Alcalá, Spain. Version 1. Available online at: http://www…
C2_7_40	Chuvieco	AraCin11	Aragon	Spain	42.2844	-0.89582		2002-07-10	2002	11	Tree cover, needleleaved, evergreen, closed to open (>15%)	117.309	1	0.0584806	0.120491	0.0854462	0.160349	Pinus halepensis			Chuvieco, E., Yebra, M., Jurdao, S., Aguado, I., Salas, F. J., García, M., Nieto, H., De Santis, A., Cocero, D., Riaño, D., Martínez, S., Zapico, E., Recondo, C., Martínez-Vega, J., Martín, M.P., Riva, J., Pérez, F. y Rodríguez-Silva, F. (2011): Field Fuel Moisture Measurements on Spanish study sites. Department of Geography, University of Alcalá, Spain. Version 1. Available online at: http://www…
C2_7_41	Chuvieco	AraCin11	Aragon	Spain	42.2844	-0.89582		2002-07-10	2002	11	Tree cover, needleleaved, evergreen, closed to open (>15%)	99.3143	1	0.0584806	0.120491	0.0854462	0.160349	Juniperus communis			Chuvieco, E., Yebra, M., Jurdao, S., Aguado, I., Salas, F. J., García, M., Nieto, H., De Santis, A., Cocero, D., Riaño, D., Martínez, S., Zapico, E., Recondo, C., Martínez-Vega, J., Martín, M.P., Riva, J., Pérez, F. y Rodríguez-Silva, F. (2011): Field Fuel Moisture Measurements on Spanish study sites. Department of Geography, University of Alcalá, Spain. Version 1. Available online at: http://www…
C2_7_42	Chuvieco	AraCin11	Aragon	Spain	42.2844	-0.89582		2002-07-10	2002	11	Tree cover, needleleaved, evergreen, closed to open (>15%)	88.7701	1	0.0584806	0.120491	0.0854462	0.160349	Quercus coccifera			Chuvieco, E., Yebra, M., Jurdao, S., Aguado, I., Salas, F. J., García, M., Nieto, H., De Santis, A., Cocero, D., Riaño, D., Martínez, S., Zapico, E., Recondo, C., Martínez-Vega, J., Martín, M.P., Riva, J., Pérez, F. y Rodríguez-Silva, F. (2011): Field Fuel Moisture Measurements on Spanish study sites. Department of Geography, University of Alcalá, Spain. Version 1. Available online at: http://www…
C2_7_43	Chuvieco	AraCin11	Aragon	Spain	42.2844	-0.89582		2002-07-10	2002	11	Tree cover, needleleaved, evergreen, closed to open (>15%)	111.338	1	0.0584806	0.120491	0.0854462	0.160349	Buxus sempervirens			Chuvieco, E., Yebra, M., Jurdao, S., Aguado, I., Salas, F. J., García, M., Nieto, H., De Santis, A., Cocero, D., Riaño, D., Martínez, S., Zapico, E., Recondo, C., Martínez-Vega, J., Martín, M.P., Riva, J., Pérez, F. y Rodríguez-Silva, F. (2011): Field Fuel Moisture Measurements on Spanish study sites. Department of Geography, University of Alcalá, Spain. Version 1. Available online at: http://www…
C2_7_44	Chuvieco	AraCin11	Aragon	Spain	42.2844	-0.89582		2002-08-11	2002	11	Tree cover, needleleaved, evergreen, closed to open (>15%)	118.88	1	0.0584806	0.120491	0.0854462	0.160349	Pinus halepensis			Chuvieco, E., Yebra, M., Jurdao, S., Aguado, I., Salas, F. J., García, M., Nieto, H., De Santis, A., Cocero, D., Riaño, D., Martínez, S., Zapico, E., Recondo, C., Martínez-Vega, J., Martín, M.P., Riva, J., Pérez, F. y Rodríguez-Silva, F. (2011): Field Fuel Moisture Measurements on Spanish study sites. Department of Geography, University of Alcalá, Spain. Version 1. Available online at: http://www…
C2_7_45	Chuvieco	AraCin11	Aragon	Spain	42.2844	-0.89582		2002-08-11	2002	11	Tree cover, needleleaved, evergreen, closed to open (>15%)	88.3955	1	0.0584806	0.120491	0.0854462	0.160349	Juniperus communis			Chuvieco, E., Yebra, M., Jurdao, S., Aguado, I., Salas, F. J., García, M., Nieto, H., De Santis, A., Cocero, D., Riaño, D., Martínez, S., Zapico, E., Recondo, C., Martínez-Vega, J., Martín, M.P., Riva, J., Pérez, F. y Rodríguez-Silva, F. (2011): Field Fuel Moisture Measurements on Spanish study sites. Department of Geography, University of Alcalá, Spain. Version 1. Available online at: http://www…
C2_7_46	Chuvieco	AraCin11	Aragon	Spain	42.2844	-0.89582		2002-08-11	2002	11	Tree cover, needleleaved, evergreen, closed to open (>15%)	75.8533	1	0.0584806	0.120491	0.0854462	0.160349	Quercus coccifera			Chuvieco, E., Yebra, M., Jurdao, S., Aguado, I., Salas, F. J., García, M., Nieto, H., De Santis, A., Cocero, D., Riaño, D., Martínez, S., Zapico, E., Recondo, C., Martínez-Vega, J., Martín, M.P., Riva, J., Pérez, F. y Rodríguez-Silva, F. (2011): Field Fuel Moisture Measurements on Spanish study sites. Department of Geography, University of Alcalá, Spain. Version 1. Available online at: http://www…
C2_7_47	Chuvieco	AraCin11	Aragon	Spain	42.2844	-0.89582		2002-08-27	2002	11	Tree cover, needleleaved, evergreen, closed to open (>15%)	125.579	1	0.0584806	0.120491	0.0854462	0.160349	Pinus halepensis			Chuvieco, E., Yebra, M., Jurdao, S., Aguado, I., Salas, F. J., García, M., Nieto, H., De Santis, A., Cocero, D., Riaño, D., Martínez, S., Zapico, E., Recondo, C., Martínez-Vega, J., Martín, M.P., Riva, J., Pérez, F. y Rodríguez-Silva, F. (2011): Field Fuel Moisture Measurements on Spanish study sites. Department of Geography, University of Alcalá, Spain. Version 1. Available online at: http://www…
C2_7_48	Chuvieco	AraCin11	Aragon	Spain	42.2844	-0.89582		2002-08-27	2002	11	Tree cover, needleleaved, evergreen, closed to open (>15%)	83.7562	1	0.0584806	0.120491	0.0854462	0.160349	Juniperus communis			Chuvieco, E., Yebra, M., Jurdao, S., Aguado, I., Salas, F. J., García, M., Nieto, H., De Santis, A., Cocero, D., Riaño, D., Martínez, S., Zapico, E., Recondo, C., Martínez-Vega, J., Martín, M.P., Riva, J., Pérez, F. y Rodríguez-Silva, F. (2011): Field Fuel Moisture Measurements on Spanish study sites. Department of Geography, University of Alcalá, Spain. Version 1. Available online at: http://www…
C2_7_49	Chuvieco	AraCin11	Aragon	Spain	42.2844	-0.89582		2002-08-27	2002	11	Tree cover, needleleaved, evergreen, closed to open (>15%)	78.9912	1	0.0584806	0.120491	0.0854462	0.160349	Quercus coccifera			Chuvieco, E., Yebra, M., Jurdao, S., Aguado, I., Salas, F. J., García, M., Nieto, H., De Santis, A., Cocero, D., Riaño, D., Martínez, S., Zapico, E., Recondo, C., Martínez-Vega, J., Martín, M.P., Riva, J., Pérez, F. y Rodríguez-Silva, F. (2011): Field Fuel Moisture Measurements on Spanish study sites. Department of Geography, University of Alcalá, Spain. Version 1. Available online at: http://www…
C2_7_50	Chuvieco	AraCin11	Aragon	Spain	42.2844	-0.89582		2002-08-27	2002	11	Tree cover, needleleaved, evergreen, closed to open (>15%)	98.8656	1	0.0584806	0.120491	0.0854462	0.160349	Buxus sempervirens			Chuvieco, E., Yebra, M., Jurdao, S., Aguado, I., Salas, F. J., García, M., Nieto, H., De Santis, A., Cocero, D., Riaño, D., Martínez, S., Zapico, E., Recondo, C., Martínez-Vega, J., Martín, M.P., Riva, J., Pérez, F. y Rodríguez-Silva, F. (2011): Field Fuel Moisture Measurements on Spanish study sites. Department of Geography, University of Alcalá, Spain. Version 1. Available online at: http://www…
C2_7_51	Chuvieco	AraCin11	Aragon	Spain	42.2844	-0.89582		2002-09-12	2002	11	Tree cover, needleleaved, evergreen, closed to open (>15%)	111.801	1	0.0584806	0.120491	0.0854462	0.160349	Pinus halepensis			Chuvieco, E., Yebra, M., Jurdao, S., Aguado, I., Salas, F. J., García, M., Nieto, H., De Santis, A., Cocero, D., Riaño, D., Martínez, S., Zapico, E., Recondo, C., Martínez-Vega, J., Martín, M.P., Riva, J., Pérez, F. y Rodríguez-Silva, F. (2011): Field Fuel Moisture Measurements on Spanish study sites. Department of Geography, University of Alcalá, Spain. Version 1. Available online at: http://www…
C2_7_52	Chuvieco	AraCin11	Aragon	Spain	42.2844	-0.89582		2002-09-12	2002	11	Tree cover, needleleaved, evergreen, closed to open (>15%)	70.3185	1	0.0584806	0.120491	0.0854462	0.160349	Juniperus communis			Chuvieco, E., Yebra, M., Jurdao, S., Aguado, I., Salas, F. J., García, M., Nieto, H., De Santis, A., Cocero, D., Riaño, D., Martínez, S., Zapico, E., Recondo, C., Martínez-Vega, J., Martín, M.P., Riva, J., Pérez, F. y Rodríguez-Silva, F. (2011): Field Fuel Moisture Measurements on Spanish study sites. Department of Geography, University of Alcalá, Spain. Version 1. Available online at: http://www…
C2_7_53	Chuvieco	AraCin11	Aragon	Spain	42.2844	-0.89582		2002-09-12	2002	11	Tree cover, needleleaved, evergreen, closed to open (>15%)	75.4893	1	0.0584806	0.120491	0.0854462	0.160349	Quercus coccifera			Chuvieco, E., Yebra, M., Jurdao, S., Aguado, I., Salas, F. J., García, M., Nieto, H., De Santis, A., Cocero, D., Riaño, D., Martínez, S., Zapico, E., Recondo, C., Martínez-Vega, J., Martín, M.P., Riva, J., Pérez, F. y Rodríguez-Silva, F. (2011): Field Fuel Moisture Measurements on Spanish study sites. Department of Geography, University of Alcalá, Spain. Version 1. Available online at: http://www…
C2_7_54	Chuvieco	AraCin11	Aragon	Spain	42.2844	-0.89582		2002-09-12	2002	11	Tree cover, needleleaved, evergreen, closed to open (>15%)	74.0602	1	0.0584806	0.120491	0.0854462	0.160349	Buxus sempervirens			Chuvieco, E., Yebra, M., Jurdao, S., Aguado, I., Salas, F. J., García, M., Nieto, H., De Santis, A., Cocero, D., Riaño, D., Martínez, S., Zapico, E., Recondo, C., Martínez-Vega, J., Martín, M.P., Riva, J., Pérez, F. y Rodríguez-Silva, F. (2011): Field Fuel Moisture Measurements on Spanish study sites. Department of Geography, University of Alcalá, Spain. Version 1. Available online at: http://www…
C2_8_1	Chuvieco	AraCin12	Aragon	Spain	42.2776	-1.01723		2001-05-24	2001	11	Mosaic cropland (>50%) / natural vegetation (tree, shrub, herbaceous cover) (<50%)	104.589	1	0.117525	0.17678	0.245319	0.365568	Quercus coccifera			Chuvieco, E., Yebra, M., Jurdao, S., Aguado, I., Salas, F. J., García, M., Nieto, H., De Santis, A., Cocero, D., Riaño, D., Martínez, S., Zapico, E., Recondo, C., Martínez-Vega, J., Martín, M.P., Riva, J., Pérez, F. y Rodríguez-Silva, F. (2011): Field Fuel Moisture Measurements on Spanish study sites. Department of Geography, University of Alcalá, Spain. Version 1. Available online at: http://www…
C2_8_2	Chuvieco	AraCin12	Aragon	Spain	42.2776	-1.01723		2001-05-24	2001	11	Mosaic cropland (>50%) / natural vegetation (tree, shrub, herbaceous cover) (<50%)	119.215	1	0.117525	0.17678	0.245319	0.365568	Genista scorpious or Ulex palvifolious			Chuvieco, E., Yebra, M., Jurdao, S., Aguado, I., Salas, F. J., García, M., Nieto, H., De Santis, A., Cocero, D., Riaño, D., Martínez, S., Zapico, E., Recondo, C., Martínez-Vega, J., Martín, M.P., Riva, J., Pérez, F. y Rodríguez-Silva, F. (2011): Field Fuel Moisture Measurements on Spanish study sites. Department of Geography, University of Alcalá, Spain. Version 1. Available online at: http://www…
C2_8_3	Chuvieco	AraCin12	Aragon	Spain	42.2776	-1.01723		2001-05-24	2001	11	Mosaic cropland (>50%) / natural vegetation (tree, shrub, herbaceous cover) (<50%)	79.4131	1	0.117525	0.17678	0.245319	0.365568	Quercus ilex			Chuvieco, E., Yebra, M., Jurdao, S., Aguado, I., Salas, F. J., García, M., Nieto, H., De Santis, A., Cocero, D., Riaño, D., Martínez, S., Zapico, E., Recondo, C., Martínez-Vega, J., Martín, M.P., Riva, J., Pérez, F. y Rodríguez-Silva, F. (2011): Field Fuel Moisture Measurements on Spanish study sites. Department of Geography, University of Alcalá, Spain. Version 1. Available online at: http://www…
C2_8_4	Chuvieco	AraCin12	Aragon	Spain	42.2776	-1.01723		2001-05-24	2001	11	Mosaic cropland (>50%) / natural vegetation (tree, shrub, herbaceous cover) (<50%)	79.4131	1	0.117525	0.17678	0.245319	0.365568	Rosmarinus officinalis			Chuvieco, E., Yebra, M., Jurdao, S., Aguado, I., Salas, F. J., García, M., Nieto, H., De Santis, A., Cocero, D., Riaño, D., Martínez, S., Zapico, E., Recondo, C., Martínez-Vega, J., Martín, M.P., Riva, J., Pérez, F. y Rodríguez-Silva, F. (2011): Field Fuel Moisture Measurements on Spanish study sites. Department of Geography, University of Alcalá, Spain. Version 1. Available online at: http://www…
C2_8_5	Chuvieco	AraCin12	Aragon	Spain	42.2776	-1.01723		2001-06-08	2001	11	Mosaic cropland (>50%) / natural vegetation (tree, shrub, herbaceous cover) (<50%)	87.4346	1	0.117525	0.17678	0.245319	0.365568	Quercus coccifera			Chuvieco, E., Yebra, M., Jurdao, S., Aguado, I., Salas, F. J., García, M., Nieto, H., De Santis, A., Cocero, D., Riaño, D., Martínez, S., Zapico, E., Recondo, C., Martínez-Vega, J., Martín, M.P., Riva, J., Pérez, F. y Rodríguez-Silva, F. (2011): Field Fuel Moisture Measurements on Spanish study sites. Department of Geography, University of Alcalá, Spain. Version 1. Available online at: http://www…
C2_8_6	Chuvieco	AraCin12	Aragon	Spain	42.2776	-1.01723		2001-06-08	2001	11	Mosaic cropland (>50%) / natural vegetation (tree, shrub, herbaceous cover) (<50%)	94.366	1	0.117525	0.17678	0.245319	0.365568	Genista scorpious or Ulex palvifolious			Chuvieco, E., Yebra, M., Jurdao, S., Aguado, I., Salas, F. J., García, M., Nieto, H., De Santis, A., Cocero, D., Riaño, D., Martínez, S., Zapico, E., Recondo, C., Martínez-Vega, J., Martín, M.P., Riva, J., Pérez, F. y Rodríguez-Silva, F. (2011): Field Fuel Moisture Measurements on Spanish study sites. Department of Geography, University of Alcalá, Spain. Version 1. Available online at: http://www…
C2_8_7	Chuvieco	AraCin12	Aragon	Spain	42.2776	-1.01723		2001-06-08	2001	11	Mosaic cropland (>50%) / natural vegetation (tree, shrub, herbaceous cover) (<50%)	80.0667	1	0.117525	0.17678	0.245319	0.365568	Quercus ilex			Chuvieco, E., Yebra, M., Jurdao, S., Aguado, I., Salas, F. J., García, M., Nieto, H., De Santis, A., Cocero, D., Riaño, D., Martínez, S., Zapico, E., Recondo, C., Martínez-Vega, J., Martín, M.P., Riva, J., Pérez, F. y Rodríguez-Silva, F. (2011): Field Fuel Moisture Measurements on Spanish study sites. Department of Geography, University of Alcalá, Spain. Version 1. Available online at: http://www…
C2_8_8	Chuvieco	AraCin12	Aragon	Spain	42.2776	-1.01723		2001-06-08	2001	11	Mosaic cropland (>50%) / natural vegetation (tree, shrub, herbaceous cover) (<50%)	80.0667	1	0.117525	0.17678	0.245319	0.365568	Rosmarinus officinalis			Chuvieco, E., Yebra, M., Jurdao, S., Aguado, I., Salas, F. J., García, M., Nieto, H., De Santis, A., Cocero, D., Riaño, D., Martínez, S., Zapico, E., Recondo, C., Martínez-Vega, J., Martín, M.P., Riva, J., Pérez, F. y Rodríguez-Silva, F. (2011): Field Fuel Moisture Measurements on Spanish study sites. Department of Geography, University of Alcalá, Spain. Version 1. Available online at: http://www…
C2_8_9	Chuvieco	AraCin12	Aragon	Spain	42.2776	-1.01723		2001-06-24	2001	11	Mosaic cropland (>50%) / natural vegetation (tree, shrub, herbaceous cover) (<50%)	80.8935	1	0.117525	0.17678	0.245319	0.365568	Quercus coccifera			Chuvieco, E., Yebra, M., Jurdao, S., Aguado, I., Salas, F. J., García, M., Nieto, H., De Santis, A., Cocero, D., Riaño, D., Martínez, S., Zapico, E., Recondo, C., Martínez-Vega, J., Martín, M.P., Riva, J., Pérez, F. y Rodríguez-Silva, F. (2011): Field Fuel Moisture Measurements on Spanish study sites. Department of Geography, University of Alcalá, Spain. Version 1. Available online at: http://www…
C2_8_10	Chuvieco	AraCin12	Aragon	Spain	42.2776	-1.01723		2001-06-24	2001	11	Mosaic cropland (>50%) / natural vegetation (tree, shrub, herbaceous cover) (<50%)	83.4623	1	0.117525	0.17678	0.245319	0.365568	Genista scorpious or Ulex palvifolious			Chuvieco, E., Yebra, M., Jurdao, S., Aguado, I., Salas, F. J., García, M., Nieto, H., De Santis, A., Cocero, D., Riaño, D., Martínez, S., Zapico, E., Recondo, C., Martínez-Vega, J., Martín, M.P., Riva, J., Pérez, F. y Rodríguez-Silva, F. (2011): Field Fuel Moisture Measurements on Spanish study sites. Department of Geography, University of Alcalá, Spain. Version 1. Available online at: http://www…
C2_8_11	Chuvieco	AraCin12	Aragon	Spain	42.2776	-1.01723		2001-06-24	2001	11	Mosaic cropland (>50%) / natural vegetation (tree, shrub, herbaceous cover) (<50%)	84.7393	1	0.117525	0.17678	0.245319	0.365568	Quercus ilex			Chuvieco, E., Yebra, M., Jurdao, S., Aguado, I., Salas, F. J., García, M., Nieto, H., De Santis, A., Cocero, D., Riaño, D., Martínez, S., Zapico, E., Recondo, C., Martínez-Vega, J., Martín, M.P., Riva, J., Pérez, F. y Rodríguez-Silva, F. (2011): Field Fuel Moisture Measurements on Spanish study sites. Department of Geography, University of Alcalá, Spain. Version 1. Available online at: http://www…
C2_8_12	Chuvieco	AraCin12	Aragon	Spain	42.2776	-1.01723		2001-06-24	2001	11	Mosaic cropland (>50%) / natural vegetation (tree, shrub, herbaceous cover) (<50%)	84.7393	1	0.117525	0.17678	0.245319	0.365568	Rosmarinus officinalis			Chuvieco, E., Yebra, M., Jurdao, S., Aguado, I., Salas, F. J., García, M., Nieto, H., De Santis, A., Cocero, D., Riaño, D., Martínez, S., Zapico, E., Recondo, C., Martínez-Vega, J., Martín, M.P., Riva, J., Pérez, F. y Rodríguez-Silva, F. (2011): Field Fuel Moisture Measurements on Spanish study sites. Department of Geography, University of Alcalá, Spain. Version 1. Available online at: http://www…
C2_8_13	Chuvieco	AraCin12	Aragon	Spain	42.2776	-1.01723		2001-07-10	2001	11	Mosaic cropland (>50%) / natural vegetation (tree, shrub, herbaceous cover) (<50%)	79.2667	1	0.117525	0.17678	0.245319	0.365568	Quercus coccifera			Chuvieco, E., Yebra, M., Jurdao, S., Aguado, I., Salas, F. J., García, M., Nieto, H., De Santis, A., Cocero, D., Riaño, D., Martínez, S., Zapico, E., Recondo, C., Martínez-Vega, J., Martín, M.P., Riva, J., Pérez, F. y Rodríguez-Silva, F. (2011): Field Fuel Moisture Measurements on Spanish study sites. Department of Geography, University of Alcalá, Spain. Version 1. Available online at: http://www…
C2_8_14	Chuvieco	AraCin12	Aragon	Spain	42.2776	-1.01723		2001-07-10	2001	11	Mosaic cropland (>50%) / natural vegetation (tree, shrub, herbaceous cover) (<50%)	66.7768	1	0.117525	0.17678	0.245319	0.365568	Genista scorpious or Ulex palvifolious			Chuvieco, E., Yebra, M., Jurdao, S., Aguado, I., Salas, F. J., García, M., Nieto, H., De Santis, A., Cocero, D., Riaño, D., Martínez, S., Zapico, E., Recondo, C., Martínez-Vega, J., Martín, M.P., Riva, J., Pérez, F. y Rodríguez-Silva, F. (2011): Field Fuel Moisture Measurements on Spanish study sites. Department of Geography, University of Alcalá, Spain. Version 1. Available online at: http://www…
C2_8_15	Chuvieco	AraCin12	Aragon	Spain	42.2776	-1.01723		2001-07-10	2001	11	Mosaic cropland (>50%) / natural vegetation (tree, shrub, herbaceous cover) (<50%)	74.1791	1	0.117525	0.17678	0.245319	0.365568	Quercus ilex			Chuvieco, E., Yebra, M., Jurdao, S., Aguado, I., Salas, F. J., García, M., Nieto, H., De Santis, A., Cocero, D., Riaño, D., Martínez, S., Zapico, E., Recondo, C., Martínez-Vega, J., Martín, M.P., Riva, J., Pérez, F. y Rodríguez-Silva, F. (2011): Field Fuel Moisture Measurements on Spanish study sites. Department of Geography, University of Alcalá, Spain. Version 1. Available online at: http://www…
C2_8_16	Chuvieco	AraCin12	Aragon	Spain	42.2776	-1.01723		2001-07-10	2001	11	Mosaic cropland (>50%) / natural vegetation (tree, shrub, herbaceous cover) (<50%)	74.1791	1	0.117525	0.17678	0.245319	0.365568	Rosmarinus officinalis			Chuvieco, E., Yebra, M., Jurdao, S., Aguado, I., Salas, F. J., García, M., Nieto, H., De Santis, A., Cocero, D., Riaño, D., Martínez, S., Zapico, E., Recondo, C., Martínez-Vega, J., Martín, M.P., Riva, J., Pérez, F. y Rodríguez-Silva, F. (2011): Field Fuel Moisture Measurements on Spanish study sites. Department of Geography, University of Alcalá, Spain. Version 1. Available online at: http://www…
C2_8_17	Chuvieco	AraCin12	Aragon	Spain	42.2776	-1.01723		2001-08-27	2001	11	Mosaic cropland (>50%) / natural vegetation (tree, shrub, herbaceous cover) (<50%)	76.2174	1	0.117525	0.17678	0.245319	0.365568	Quercus coccifera			Chuvieco, E., Yebra, M., Jurdao, S., Aguado, I., Salas, F. J., García, M., Nieto, H., De Santis, A., Cocero, D., Riaño, D., Martínez, S., Zapico, E., Recondo, C., Martínez-Vega, J., Martín, M.P., Riva, J., Pérez, F. y Rodríguez-Silva, F. (2011): Field Fuel Moisture Measurements on Spanish study sites. Department of Geography, University of Alcalá, Spain. Version 1. Available online at: http://www…
C2_8_18	Chuvieco	AraCin12	Aragon	Spain	42.2776	-1.01723		2001-08-27	2001	11	Mosaic cropland (>50%) / natural vegetation (tree, shrub, herbaceous cover) (<50%)	39.1643	1	0.117525	0.17678	0.245319	0.365568	Genista scorpious or Ulex palvifolious			Chuvieco, E., Yebra, M., Jurdao, S., Aguado, I., Salas, F. J., García, M., Nieto, H., De Santis, A., Cocero, D., Riaño, D., Martínez, S., Zapico, E., Recondo, C., Martínez-Vega, J., Martín, M.P., Riva, J., Pérez, F. y Rodríguez-Silva, F. (2011): Field Fuel Moisture Measurements on Spanish study sites. Department of Geography, University of Alcalá, Spain. Version 1. Available online at: http://www…
C2_8_19	Chuvieco	AraCin12	Aragon	Spain	42.2776	-1.01723		2001-08-27	2001	11	Mosaic cropland (>50%) / natural vegetation (tree, shrub, herbaceous cover) (<50%)	66.2647	1	0.117525	0.17678	0.245319	0.365568	Quercus ilex			Chuvieco, E., Yebra, M., Jurdao, S., Aguado, I., Salas, F. J., García, M., Nieto, H., De Santis, A., Cocero, D., Riaño, D., Martínez, S., Zapico, E., Recondo, C., Martínez-Vega, J., Martín, M.P., Riva, J., Pérez, F. y Rodríguez-Silva, F. (2011): Field Fuel Moisture Measurements on Spanish study sites. Department of Geography, University of Alcalá, Spain. Version 1. Available online at: http://www…
C2_8_20	Chuvieco	AraCin12	Aragon	Spain	42.2776	-1.01723		2001-08-27	2001	11	Mosaic cropland (>50%) / natural vegetation (tree, shrub, herbaceous cover) (<50%)	66.2647	1	0.117525	0.17678	0.245319	0.365568	Rosmarinus officinalis			Chuvieco, E., Yebra, M., Jurdao, S., Aguado, I., Salas, F. J., García, M., Nieto, H., De Santis, A., Cocero, D., Riaño, D., Martínez, S., Zapico, E., Recondo, C., Martínez-Vega, J., Martín, M.P., Riva, J., Pérez, F. y Rodríguez-Silva, F. (2011): Field Fuel Moisture Measurements on Spanish study sites. Department of Geography, University of Alcalá, Spain. Version 1. Available online at: http://www…
C2_8_21	Chuvieco	AraCin12	Aragon	Spain	42.2776	-1.01723		2001-09-12	2001	11	Mosaic cropland (>50%) / natural vegetation (tree, shrub, herbaceous cover) (<50%)	97.5435	1	0.117525	0.17678	0.245319	0.365568	Quercus coccifera			Chuvieco, E., Yebra, M., Jurdao, S., Aguado, I., Salas, F. J., García, M., Nieto, H., De Santis, A., Cocero, D., Riaño, D., Martínez, S., Zapico, E., Recondo, C., Martínez-Vega, J., Martín, M.P., Riva, J., Pérez, F. y Rodríguez-Silva, F. (2011): Field Fuel Moisture Measurements on Spanish study sites. Department of Geography, University of Alcalá, Spain. Version 1. Available online at: http://www…
C2_8_22	Chuvieco	AraCin12	Aragon	Spain	42.2776	-1.01723		2001-09-12	2001	11	Mosaic cropland (>50%) / natural vegetation (tree, shrub, herbaceous cover) (<50%)	37.4464	1	0.117525	0.17678	0.245319	0.365568	Genista scorpious or Ulex palvifolious			Chuvieco, E., Yebra, M., Jurdao, S., Aguado, I., Salas, F. J., García, M., Nieto, H., De Santis, A., Cocero, D., Riaño, D., Martínez, S., Zapico, E., Recondo, C., Martínez-Vega, J., Martín, M.P., Riva, J., Pérez, F. y Rodríguez-Silva, F. (2011): Field Fuel Moisture Measurements on Spanish study sites. Department of Geography, University of Alcalá, Spain. Version 1. Available online at: http://www…
C2_8_23	Chuvieco	AraCin12	Aragon	Spain	42.2776	-1.01723		2001-09-12	2001	11	Mosaic cropland (>50%) / natural vegetation (tree, shrub, herbaceous cover) (<50%)	67.2406	1	0.117525	0.17678	0.245319	0.365568	Quercus ilex			Chuvieco, E., Yebra, M., Jurdao, S., Aguado, I., Salas, F. J., García, M., Nieto, H., De Santis, A., Cocero, D., Riaño, D., Martínez, S., Zapico, E., Recondo, C., Martínez-Vega, J., Martín, M.P., Riva, J., Pérez, F. y Rodríguez-Silva, F. (2011): Field Fuel Moisture Measurements on Spanish study sites. Department of Geography, University of Alcalá, Spain. Version 1. Available online at: http://www…
C2_8_24	Chuvieco	AraCin12	Aragon	Spain	42.2776	-1.01723		2001-09-12	2001	11	Mosaic cropland (>50%) / natural vegetation (tree, shrub, herbaceous cover) (<50%)	67.2406	1	0.117525	0.17678	0.245319	0.365568	Rosmarinus officinalis			Chuvieco, E., Yebra, M., Jurdao, S., Aguado, I., Salas, F. J., García, M., Nieto, H., De Santis, A., Cocero, D., Riaño, D., Martínez, S., Zapico, E., Recondo, C., Martínez-Vega, J., Martín, M.P., Riva, J., Pérez, F. y Rodríguez-Silva, F. (2011): Field Fuel Moisture Measurements on Spanish study sites. Department of Geography, University of Alcalá, Spain. Version 1. Available online at: http://www…
C2_8_25	Chuvieco	AraCin12	Aragon	Spain	42.2776	-1.01723		2002-05-23	2002	11	Mosaic cropland (>50%) / natural vegetation (tree, shrub, herbaceous cover) (<50%)	104.589	1	0.117525	0.17678	0.245319	0.365568	Quercus coccifera			Chuvieco, E., Yebra, M., Jurdao, S., Aguado, I., Salas, F. J., García, M., Nieto, H., De Santis, A., Cocero, D., Riaño, D., Martínez, S., Zapico, E., Recondo, C., Martínez-Vega, J., Martín, M.P., Riva, J., Pérez, F. y Rodríguez-Silva, F. (2011): Field Fuel Moisture Measurements on Spanish study sites. Department of Geography, University of Alcalá, Spain. Version 1. Available online at: http://www…
C2_8_26	Chuvieco	AraCin12	Aragon	Spain	42.2776	-1.01723		2002-05-23	2002	11	Mosaic cropland (>50%) / natural vegetation (tree, shrub, herbaceous cover) (<50%)	119.215	1	0.117525	0.17678	0.245319	0.365568	Genista scorpious or Ulex palvifolious			Chuvieco, E., Yebra, M., Jurdao, S., Aguado, I., Salas, F. J., García, M., Nieto, H., De Santis, A., Cocero, D., Riaño, D., Martínez, S., Zapico, E., Recondo, C., Martínez-Vega, J., Martín, M.P., Riva, J., Pérez, F. y Rodríguez-Silva, F. (2011): Field Fuel Moisture Measurements on Spanish study sites. Department of Geography, University of Alcalá, Spain. Version 1. Available online at: http://www…
C2_8_27	Chuvieco	AraCin12	Aragon	Spain	42.2776	-1.01723		2002-05-23	2002	11	Mosaic cropland (>50%) / natural vegetation (tree, shrub, herbaceous cover) (<50%)	79.4131	1	0.117525	0.17678	0.245319	0.365568	Quercus ilex			Chuvieco, E., Yebra, M., Jurdao, S., Aguado, I., Salas, F. J., García, M., Nieto, H., De Santis, A., Cocero, D., Riaño, D., Martínez, S., Zapico, E., Recondo, C., Martínez-Vega, J., Martín, M.P., Riva, J., Pérez, F. y Rodríguez-Silva, F. (2011): Field Fuel Moisture Measurements on Spanish study sites. Department of Geography, University of Alcalá, Spain. Version 1. Available online at: http://www…
C2_8_28	Chuvieco	AraCin12	Aragon	Spain	42.2776	-1.01723		2002-05-23	2002	11	Mosaic cropland (>50%) / natural vegetation (tree, shrub, herbaceous cover) (<50%)	140.24	1	0.117525	0.17678	0.245319	0.365568	Rosmarinus officinalis			Chuvieco, E., Yebra, M., Jurdao, S., Aguado, I., Salas, F. J., García, M., Nieto, H., De Santis, A., Cocero, D., Riaño, D., Martínez, S., Zapico, E., Recondo, C., Martínez-Vega, J., Martín, M.P., Riva, J., Pérez, F. y Rodríguez-Silva, F. (2011): Field Fuel Moisture Measurements on Spanish study sites. Department of Geography, University of Alcalá, Spain. Version 1. Available online at: http://www…
C2_8_29	Chuvieco	AraCin12	Aragon	Spain	42.2776	-1.01723		2002-06-08	2002	11	Mosaic cropland (>50%) / natural vegetation (tree, shrub, herbaceous cover) (<50%)	87.4346	1	0.117525	0.17678	0.245319	0.365568	Quercus coccifera			Chuvieco, E., Yebra, M., Jurdao, S., Aguado, I., Salas, F. J., García, M., Nieto, H., De Santis, A., Cocero, D., Riaño, D., Martínez, S., Zapico, E., Recondo, C., Martínez-Vega, J., Martín, M.P., Riva, J., Pérez, F. y Rodríguez-Silva, F. (2011): Field Fuel Moisture Measurements on Spanish study sites. Department of Geography, University of Alcalá, Spain. Version 1. Available online at: http://www…
C2_8_30	Chuvieco	AraCin12	Aragon	Spain	42.2776	-1.01723		2002-06-08	2002	11	Mosaic cropland (>50%) / natural vegetation (tree, shrub, herbaceous cover) (<50%)	94.366	1	0.117525	0.17678	0.245319	0.365568	Genista scorpious or Ulex palvifolious			Chuvieco, E., Yebra, M., Jurdao, S., Aguado, I., Salas, F. J., García, M., Nieto, H., De Santis, A., Cocero, D., Riaño, D., Martínez, S., Zapico, E., Recondo, C., Martínez-Vega, J., Martín, M.P., Riva, J., Pérez, F. y Rodríguez-Silva, F. (2011): Field Fuel Moisture Measurements on Spanish study sites. Department of Geography, University of Alcalá, Spain. Version 1. Available online at: http://www…
C2_8_31	Chuvieco	AraCin12	Aragon	Spain	42.2776	-1.01723		2002-06-08	2002	11	Mosaic cropland (>50%) / natural vegetation (tree, shrub, herbaceous cover) (<50%)	80.0667	1	0.117525	0.17678	0.245319	0.365568	Quercus ilex			Chuvieco, E., Yebra, M., Jurdao, S., Aguado, I., Salas, F. J., García, M., Nieto, H., De Santis, A., Cocero, D., Riaño, D., Martínez, S., Zapico, E., Recondo, C., Martínez-Vega, J., Martín, M.P., Riva, J., Pérez, F. y Rodríguez-Silva, F. (2011): Field Fuel Moisture Measurements on Spanish study sites. Department of Geography, University of Alcalá, Spain. Version 1. Available online at: http://www…
C2_8_32	Chuvieco	AraCin12	Aragon	Spain	42.2776	-1.01723		2002-06-08	2002	11	Mosaic cropland (>50%) / natural vegetation (tree, shrub, herbaceous cover) (<50%)	145.125	1	0.117525	0.17678	0.245319	0.365568	Rosmarinus officinalis			Chuvieco, E., Yebra, M., Jurdao, S., Aguado, I., Salas, F. J., García, M., Nieto, H., De Santis, A., Cocero, D., Riaño, D., Martínez, S., Zapico, E., Recondo, C., Martínez-Vega, J., Martín, M.P., Riva, J., Pérez, F. y Rodríguez-Silva, F. (2011): Field Fuel Moisture Measurements on Spanish study sites. Department of Geography, University of Alcalá, Spain. Version 1. Available online at: http://www…
C2_8_33	Chuvieco	AraCin12	Aragon	Spain	42.2776	-1.01723		2002-06-24	2002	11	Mosaic cropland (>50%) / natural vegetation (tree, shrub, herbaceous cover) (<50%)	80.8935	1	0.117525	0.17678	0.245319	0.365568	Quercus coccifera			Chuvieco, E., Yebra, M., Jurdao, S., Aguado, I., Salas, F. J., García, M., Nieto, H., De Santis, A., Cocero, D., Riaño, D., Martínez, S., Zapico, E., Recondo, C., Martínez-Vega, J., Martín, M.P., Riva, J., Pérez, F. y Rodríguez-Silva, F. (2011): Field Fuel Moisture Measurements on Spanish study sites. Department of Geography, University of Alcalá, Spain. Version 1. Available online at: http://www…
C2_8_34	Chuvieco	AraCin12	Aragon	Spain	42.2776	-1.01723		2002-06-24	2002	11	Mosaic cropland (>50%) / natural vegetation (tree, shrub, herbaceous cover) (<50%)	83.4623	1	0.117525	0.17678	0.245319	0.365568	Genista scorpious or Ulex palvifolious			Chuvieco, E., Yebra, M., Jurdao, S., Aguado, I., Salas, F. J., García, M., Nieto, H., De Santis, A., Cocero, D., Riaño, D., Martínez, S., Zapico, E., Recondo, C., Martínez-Vega, J., Martín, M.P., Riva, J., Pérez, F. y Rodríguez-Silva, F. (2011): Field Fuel Moisture Measurements on Spanish study sites. Department of Geography, University of Alcalá, Spain. Version 1. Available online at: http://www…
C2_8_35	Chuvieco	AraCin12	Aragon	Spain	42.2776	-1.01723		2002-06-24	2002	11	Mosaic cropland (>50%) / natural vegetation (tree, shrub, herbaceous cover) (<50%)	84.7393	1	0.117525	0.17678	0.245319	0.365568	Quercus ilex			Chuvieco, E., Yebra, M., Jurdao, S., Aguado, I., Salas, F. J., García, M., Nieto, H., De Santis, A., Cocero, D., Riaño, D., Martínez, S., Zapico, E., Recondo, C., Martínez-Vega, J., Martín, M.P., Riva, J., Pérez, F. y Rodríguez-Silva, F. (2011): Field Fuel Moisture Measurements on Spanish study sites. Department of Geography, University of Alcalá, Spain. Version 1. Available online at: http://www…
C2_8_36	Chuvieco	AraCin12	Aragon	Spain	42.2776	-1.01723		2002-06-24	2002	11	Mosaic cropland (>50%) / natural vegetation (tree, shrub, herbaceous cover) (<50%)	113.138	1	0.117525	0.17678	0.245319	0.365568	Rosmarinus officinalis			Chuvieco, E., Yebra, M., Jurdao, S., Aguado, I., Salas, F. J., García, M., Nieto, H., De Santis, A., Cocero, D., Riaño, D., Martínez, S., Zapico, E., Recondo, C., Martínez-Vega, J., Martín, M.P., Riva, J., Pérez, F. y Rodríguez-Silva, F. (2011): Field Fuel Moisture Measurements on Spanish study sites. Department of Geography, University of Alcalá, Spain. Version 1. Available online at: http://www…
C2_8_37	Chuvieco	AraCin12	Aragon	Spain	42.2776	-1.01723		2002-07-10	2002	11	Mosaic cropland (>50%) / natural vegetation (tree, shrub, herbaceous cover) (<50%)	79.2667	1	0.117525	0.17678	0.245319	0.365568	Quercus coccifera			Chuvieco, E., Yebra, M., Jurdao, S., Aguado, I., Salas, F. J., García, M., Nieto, H., De Santis, A., Cocero, D., Riaño, D., Martínez, S., Zapico, E., Recondo, C., Martínez-Vega, J., Martín, M.P., Riva, J., Pérez, F. y Rodríguez-Silva, F. (2011): Field Fuel Moisture Measurements on Spanish study sites. Department of Geography, University of Alcalá, Spain. Version 1. Available online at: http://www…
C2_8_38	Chuvieco	AraCin12	Aragon	Spain	42.2776	-1.01723		2002-07-10	2002	11	Mosaic cropland (>50%) / natural vegetation (tree, shrub, herbaceous cover) (<50%)	66.7768	1	0.117525	0.17678	0.245319	0.365568	Genista scorpious or Ulex palvifolious			Chuvieco, E., Yebra, M., Jurdao, S., Aguado, I., Salas, F. J., García, M., Nieto, H., De Santis, A., Cocero, D., Riaño, D., Martínez, S., Zapico, E., Recondo, C., Martínez-Vega, J., Martín, M.P., Riva, J., Pérez, F. y Rodríguez-Silva, F. (2011): Field Fuel Moisture Measurements on Spanish study sites. Department of Geography, University of Alcalá, Spain. Version 1. Available online at: http://www…
C2_8_39	Chuvieco	AraCin12	Aragon	Spain	42.2776	-1.01723		2002-07-10	2002	11	Mosaic cropland (>50%) / natural vegetation (tree, shrub, herbaceous cover) (<50%)	74.1791	1	0.117525	0.17678	0.245319	0.365568	Quercus ilex			Chuvieco, E., Yebra, M., Jurdao, S., Aguado, I., Salas, F. J., García, M., Nieto, H., De Santis, A., Cocero, D., Riaño, D., Martínez, S., Zapico, E., Recondo, C., Martínez-Vega, J., Martín, M.P., Riva, J., Pérez, F. y Rodríguez-Silva, F. (2011): Field Fuel Moisture Measurements on Spanish study sites. Department of Geography, University of Alcalá, Spain. Version 1. Available online at: http://www…
C2_8_40	Chuvieco	AraCin12	Aragon	Spain	42.2776	-1.01723		2002-07-10	2002	11	Mosaic cropland (>50%) / natural vegetation (tree, shrub, herbaceous cover) (<50%)	112.871	1	0.117525	0.17678	0.245319	0.365568	Rosmarinus officinalis			Chuvieco, E., Yebra, M., Jurdao, S., Aguado, I., Salas, F. J., García, M., Nieto, H., De Santis, A., Cocero, D., Riaño, D., Martínez, S., Zapico, E., Recondo, C., Martínez-Vega, J., Martín, M.P., Riva, J., Pérez, F. y Rodríguez-Silva, F. (2011): Field Fuel Moisture Measurements on Spanish study sites. Department of Geography, University of Alcalá, Spain. Version 1. Available online at: http://www…
C2_8_41	Chuvieco	AraCin12	Aragon	Spain	42.2776	-1.01723		2002-08-27	2002	11	Mosaic cropland (>50%) / natural vegetation (tree, shrub, herbaceous cover) (<50%)	76.2174	1	0.117525	0.17678	0.245319	0.365568	Quercus coccifera			Chuvieco, E., Yebra, M., Jurdao, S., Aguado, I., Salas, F. J., García, M., Nieto, H., De Santis, A., Cocero, D., Riaño, D., Martínez, S., Zapico, E., Recondo, C., Martínez-Vega, J., Martín, M.P., Riva, J., Pérez, F. y Rodríguez-Silva, F. (2011): Field Fuel Moisture Measurements on Spanish study sites. Department of Geography, University of Alcalá, Spain. Version 1. Available online at: http://www…
C2_8_42	Chuvieco	AraCin12	Aragon	Spain	42.2776	-1.01723		2002-08-27	2002	11	Mosaic cropland (>50%) / natural vegetation (tree, shrub, herbaceous cover) (<50%)	39.1643	1	0.117525	0.17678	0.245319	0.365568	Genista scorpious or Ulex palvifolious			Chuvieco, E., Yebra, M., Jurdao, S., Aguado, I., Salas, F. J., García, M., Nieto, H., De Santis, A., Cocero, D., Riaño, D., Martínez, S., Zapico, E., Recondo, C., Martínez-Vega, J., Martín, M.P., Riva, J., Pérez, F. y Rodríguez-Silva, F. (2011): Field Fuel Moisture Measurements on Spanish study sites. Department of Geography, University of Alcalá, Spain. Version 1. Available online at: http://www…
C2_8_43	Chuvieco	AraCin12	Aragon	Spain	42.2776	-1.01723		2002-08-27	2002	11	Mosaic cropland (>50%) / natural vegetation (tree, shrub, herbaceous cover) (<50%)	66.2647	1	0.117525	0.17678	0.245319	0.365568	Quercus ilex			Chuvieco, E., Yebra, M., Jurdao, S., Aguado, I., Salas, F. J., García, M., Nieto, H., De Santis, A., Cocero, D., Riaño, D., Martínez, S., Zapico, E., Recondo, C., Martínez-Vega, J., Martín, M.P., Riva, J., Pérez, F. y Rodríguez-Silva, F. (2011): Field Fuel Moisture Measurements on Spanish study sites. Department of Geography, University of Alcalá, Spain. Version 1. Available online at: http://www…
C2_8_44	Chuvieco	AraCin12	Aragon	Spain	42.2776	-1.01723		2002-08-27	2002	11	Mosaic cropland (>50%) / natural vegetation (tree, shrub, herbaceous cover) (<50%)	80.0537	1	0.117525	0.17678	0.245319	0.365568	Rosmarinus officinalis			Chuvieco, E., Yebra, M., Jurdao, S., Aguado, I., Salas, F. J., García, M., Nieto, H., De Santis, A., Cocero, D., Riaño, D., Martínez, S., Zapico, E., Recondo, C., Martínez-Vega, J., Martín, M.P., Riva, J., Pérez, F. y Rodríguez-Silva, F. (2011): Field Fuel Moisture Measurements on Spanish study sites. Department of Geography, University of Alcalá, Spain. Version 1. Available online at: http://www…
C2_8_45	Chuvieco	AraCin12	Aragon	Spain	42.2776	-1.01723		2002-09-12	2002	11	Mosaic cropland (>50%) / natural vegetation (tree, shrub, herbaceous cover) (<50%)	97.5435	1	0.117525	0.17678	0.245319	0.365568	Quercus coccifera			Chuvieco, E., Yebra, M., Jurdao, S., Aguado, I., Salas, F. J., García, M., Nieto, H., De Santis, A., Cocero, D., Riaño, D., Martínez, S., Zapico, E., Recondo, C., Martínez-Vega, J., Martín, M.P., Riva, J., Pérez, F. y Rodríguez-Silva, F. (2011): Field Fuel Moisture Measurements on Spanish study sites. Department of Geography, University of Alcalá, Spain. Version 1. Available online at: http://www…
C2_8_46	Chuvieco	AraCin12	Aragon	Spain	42.2776	-1.01723		2002-09-12	2002	11	Mosaic cropland (>50%) / natural vegetation (tree, shrub, herbaceous cover) (<50%)	37.4464	1	0.117525	0.17678	0.245319	0.365568	Genista scorpious or Ulex palvifolious			Chuvieco, E., Yebra, M., Jurdao, S., Aguado, I., Salas, F. J., García, M., Nieto, H., De Santis, A., Cocero, D., Riaño, D., Martínez, S., Zapico, E., Recondo, C., Martínez-Vega, J., Martín, M.P., Riva, J., Pérez, F. y Rodríguez-Silva, F. (2011): Field Fuel Moisture Measurements on Spanish study sites. Department of Geography, University of Alcalá, Spain. Version 1. Available online at: http://www…
C2_8_47	Chuvieco	AraCin12	Aragon	Spain	42.2776	-1.01723		2002-09-12	2002	11	Mosaic cropland (>50%) / natural vegetation (tree, shrub, herbaceous cover) (<50%)	67.2406	1	0.117525	0.17678	0.245319	0.365568	Quercus ilex			Chuvieco, E., Yebra, M., Jurdao, S., Aguado, I., Salas, F. J., García, M., Nieto, H., De Santis, A., Cocero, D., Riaño, D., Martínez, S., Zapico, E., Recondo, C., Martínez-Vega, J., Martín, M.P., Riva, J., Pérez, F. y Rodríguez-Silva, F. (2011): Field Fuel Moisture Measurements on Spanish study sites. Department of Geography, University of Alcalá, Spain. Version 1. Available online at: http://www…
C2_8_48	Chuvieco	AraCin12	Aragon	Spain	42.2776	-1.01723		2002-09-12	2002	11	Mosaic cropland (>50%) / natural vegetation (tree, shrub, herbaceous cover) (<50%)	98.6409	1	0.117525	0.17678	0.245319	0.365568	Rosmarinus officinalis			Chuvieco, E., Yebra, M., Jurdao, S., Aguado, I., Salas, F. J., García, M., Nieto, H., De Santis, A., Cocero, D., Riaño, D., Martínez, S., Zapico, E., Recondo, C., Martínez-Vega, J., Martín, M.P., Riva, J., Pérez, F. y Rodríguez-Silva, F. (2011): Field Fuel Moisture Measurements on Spanish study sites. Department of Geography, University of Alcalá, Spain. Version 1. Available online at: http://www…
C2_9_1	Chuvieco	AraCin9	Aragon	Spain	42.4021	-0.928257		2001-05-24	2001	11	Tree cover, needleleaved, evergreen, closed to open (>15%)	90.0386	1	0.0572803	0.07764	0.0754334	0.111063	Pinus nigra laricio			Chuvieco, E., Yebra, M., Jurdao, S., Aguado, I., Salas, F. J., García, M., Nieto, H., De Santis, A., Cocero, D., Riaño, D., Martínez, S., Zapico, E., Recondo, C., Martínez-Vega, J., Martín, M.P., Riva, J., Pérez, F. y Rodríguez-Silva, F. (2011): Field Fuel Moisture Measurements on Spanish study sites. Department of Geography, University of Alcalá, Spain. Version 1. Available online at: http://www…
C2_9_2	Chuvieco	AraCin9	Aragon	Spain	42.4021	-0.928257		2001-05-24	2001	11	Tree cover, needleleaved, evergreen, closed to open (>15%)	93.1261	1	0.0572803	0.07764	0.0754334	0.111063	Quercus ilex			Chuvieco, E., Yebra, M., Jurdao, S., Aguado, I., Salas, F. J., García, M., Nieto, H., De Santis, A., Cocero, D., Riaño, D., Martínez, S., Zapico, E., Recondo, C., Martínez-Vega, J., Martín, M.P., Riva, J., Pérez, F. y Rodríguez-Silva, F. (2011): Field Fuel Moisture Measurements on Spanish study sites. Department of Geography, University of Alcalá, Spain. Version 1. Available online at: http://www…
C2_9_3	Chuvieco	AraCin9	Aragon	Spain	42.4021	-0.928257		2001-06-08	2001	11	Tree cover, needleleaved, evergreen, closed to open (>15%)	94.8203	1	0.0572803	0.07764	0.0754334	0.111063	Pinus nigra laricio			Chuvieco, E., Yebra, M., Jurdao, S., Aguado, I., Salas, F. J., García, M., Nieto, H., De Santis, A., Cocero, D., Riaño, D., Martínez, S., Zapico, E., Recondo, C., Martínez-Vega, J., Martín, M.P., Riva, J., Pérez, F. y Rodríguez-Silva, F. (2011): Field Fuel Moisture Measurements on Spanish study sites. Department of Geography, University of Alcalá, Spain. Version 1. Available online at: http://www…
C2_9_4	Chuvieco	AraCin9	Aragon	Spain	42.4021	-0.928257		2001-06-08	2001	11	Tree cover, needleleaved, evergreen, closed to open (>15%)	82.9525	1	0.0572803	0.07764	0.0754334	0.111063	Quercus ilex			Chuvieco, E., Yebra, M., Jurdao, S., Aguado, I., Salas, F. J., García, M., Nieto, H., De Santis, A., Cocero, D., Riaño, D., Martínez, S., Zapico, E., Recondo, C., Martínez-Vega, J., Martín, M.P., Riva, J., Pérez, F. y Rodríguez-Silva, F. (2011): Field Fuel Moisture Measurements on Spanish study sites. Department of Geography, University of Alcalá, Spain. Version 1. Available online at: http://www…
C2_9_5	Chuvieco	AraCin9	Aragon	Spain	42.4021	-0.928257		2001-06-24	2001	11	Tree cover, needleleaved, evergreen, closed to open (>15%)	91.3201	1	0.0572803	0.07764	0.0754334	0.111063	Pinus nigra laricio			Chuvieco, E., Yebra, M., Jurdao, S., Aguado, I., Salas, F. J., García, M., Nieto, H., De Santis, A., Cocero, D., Riaño, D., Martínez, S., Zapico, E., Recondo, C., Martínez-Vega, J., Martín, M.P., Riva, J., Pérez, F. y Rodríguez-Silva, F. (2011): Field Fuel Moisture Measurements on Spanish study sites. Department of Geography, University of Alcalá, Spain. Version 1. Available online at: http://www…
C2_9_6	Chuvieco	AraCin9	Aragon	Spain	42.4021	-0.928257		2001-06-24	2001	11	Tree cover, needleleaved, evergreen, closed to open (>15%)	85.3003	1	0.0572803	0.07764	0.0754334	0.111063	Quercus ilex			Chuvieco, E., Yebra, M., Jurdao, S., Aguado, I., Salas, F. J., García, M., Nieto, H., De Santis, A., Cocero, D., Riaño, D., Martínez, S., Zapico, E., Recondo, C., Martínez-Vega, J., Martín, M.P., Riva, J., Pérez, F. y Rodríguez-Silva, F. (2011): Field Fuel Moisture Measurements on Spanish study sites. Department of Geography, University of Alcalá, Spain. Version 1. Available online at: http://www…
C2_9_7	Chuvieco	AraCin9	Aragon	Spain	42.4021	-0.928257		2001-07-10	2001	11	Tree cover, needleleaved, evergreen, closed to open (>15%)	106.851	1	0.0572803	0.07764	0.0754334	0.111063	Pinus nigra laricio			Chuvieco, E., Yebra, M., Jurdao, S., Aguado, I., Salas, F. J., García, M., Nieto, H., De Santis, A., Cocero, D., Riaño, D., Martínez, S., Zapico, E., Recondo, C., Martínez-Vega, J., Martín, M.P., Riva, J., Pérez, F. y Rodríguez-Silva, F. (2011): Field Fuel Moisture Measurements on Spanish study sites. Department of Geography, University of Alcalá, Spain. Version 1. Available online at: http://www…
C2_9_8	Chuvieco	AraCin9	Aragon	Spain	42.4021	-0.928257		2001-07-10	2001	11	Tree cover, needleleaved, evergreen, closed to open (>15%)	79.5242	1	0.0572803	0.07764	0.0754334	0.111063	Quercus ilex			Chuvieco, E., Yebra, M., Jurdao, S., Aguado, I., Salas, F. J., García, M., Nieto, H., De Santis, A., Cocero, D., Riaño, D., Martínez, S., Zapico, E., Recondo, C., Martínez-Vega, J., Martín, M.P., Riva, J., Pérez, F. y Rodríguez-Silva, F. (2011): Field Fuel Moisture Measurements on Spanish study sites. Department of Geography, University of Alcalá, Spain. Version 1. Available online at: http://www…
C2_9_9	Chuvieco	AraCin9	Aragon	Spain	42.4021	-0.928257		2001-08-11	2001	11	Tree cover, needleleaved, evergreen, closed to open (>15%)	107.659	1	0.0572803	0.07764	0.0754334	0.111063	Pinus nigra laricio			Chuvieco, E., Yebra, M., Jurdao, S., Aguado, I., Salas, F. J., García, M., Nieto, H., De Santis, A., Cocero, D., Riaño, D., Martínez, S., Zapico, E., Recondo, C., Martínez-Vega, J., Martín, M.P., Riva, J., Pérez, F. y Rodríguez-Silva, F. (2011): Field Fuel Moisture Measurements on Spanish study sites. Department of Geography, University of Alcalá, Spain. Version 1. Available online at: http://www…
C2_9_10	Chuvieco	AraCin9	Aragon	Spain	42.4021	-0.928257		2001-08-11	2001	11	Tree cover, needleleaved, evergreen, closed to open (>15%)	75.283	1	0.0572803	0.07764	0.0754334	0.111063	Quercus ilex			Chuvieco, E., Yebra, M., Jurdao, S., Aguado, I., Salas, F. J., García, M., Nieto, H., De Santis, A., Cocero, D., Riaño, D., Martínez, S., Zapico, E., Recondo, C., Martínez-Vega, J., Martín, M.P., Riva, J., Pérez, F. y Rodríguez-Silva, F. (2011): Field Fuel Moisture Measurements on Spanish study sites. Department of Geography, University of Alcalá, Spain. Version 1. Available online at: http://www…
C2_9_11	Chuvieco	AraCin9	Aragon	Spain	42.4021	-0.928257		2001-08-27	2001	11	Tree cover, needleleaved, evergreen, closed to open (>15%)	109.171	1	0.0572803	0.07764	0.0754334	0.111063	Pinus nigra laricio			Chuvieco, E., Yebra, M., Jurdao, S., Aguado, I., Salas, F. J., García, M., Nieto, H., De Santis, A., Cocero, D., Riaño, D., Martínez, S., Zapico, E., Recondo, C., Martínez-Vega, J., Martín, M.P., Riva, J., Pérez, F. y Rodríguez-Silva, F. (2011): Field Fuel Moisture Measurements on Spanish study sites. Department of Geography, University of Alcalá, Spain. Version 1. Available online at: http://www…
C2_9_12	Chuvieco	AraCin9	Aragon	Spain	42.4021	-0.928257		2001-08-27	2001	11	Tree cover, needleleaved, evergreen, closed to open (>15%)	72.0831	1	0.0572803	0.07764	0.0754334	0.111063	Quercus ilex			Chuvieco, E., Yebra, M., Jurdao, S., Aguado, I., Salas, F. J., García, M., Nieto, H., De Santis, A., Cocero, D., Riaño, D., Martínez, S., Zapico, E., Recondo, C., Martínez-Vega, J., Martín, M.P., Riva, J., Pérez, F. y Rodríguez-Silva, F. (2011): Field Fuel Moisture Measurements on Spanish study sites. Department of Geography, University of Alcalá, Spain. Version 1. Available online at: http://www…
C2_9_13	Chuvieco	AraCin9	Aragon	Spain	42.4021	-0.928257		2001-09-12	2001	11	Tree cover, needleleaved, evergreen, closed to open (>15%)	108.076	1	0.0572803	0.07764	0.0754334	0.111063	Pinus nigra laricio			Chuvieco, E., Yebra, M., Jurdao, S., Aguado, I., Salas, F. J., García, M., Nieto, H., De Santis, A., Cocero, D., Riaño, D., Martínez, S., Zapico, E., Recondo, C., Martínez-Vega, J., Martín, M.P., Riva, J., Pérez, F. y Rodríguez-Silva, F. (2011): Field Fuel Moisture Measurements on Spanish study sites. Department of Geography, University of Alcalá, Spain. Version 1. Available online at: http://www…
C2_9_14	Chuvieco	AraCin9	Aragon	Spain	42.4021	-0.928257		2001-09-12	2001	11	Tree cover, needleleaved, evergreen, closed to open (>15%)	77.0398	1	0.0572803	0.07764	0.0754334	0.111063	Quercus ilex			Chuvieco, E., Yebra, M., Jurdao, S., Aguado, I., Salas, F. J., García, M., Nieto, H., De Santis, A., Cocero, D., Riaño, D., Martínez, S., Zapico, E., Recondo, C., Martínez-Vega, J., Martín, M.P., Riva, J., Pérez, F. y Rodríguez-Silva, F. (2011): Field Fuel Moisture Measurements on Spanish study sites. Department of Geography, University of Alcalá, Spain. Version 1. Available online at: http://www…
C2_9_15	Chuvieco	AraCin9	Aragon	Spain	42.4021	-0.928257		2002-05-23	2002	11	Tree cover, needleleaved, evergreen, closed to open (>15%)	90.0386	1	0.0572803	0.07764	0.0754334	0.111063	Pinus nigra laricio			Chuvieco, E., Yebra, M., Jurdao, S., Aguado, I., Salas, F. J., García, M., Nieto, H., De Santis, A., Cocero, D., Riaño, D., Martínez, S., Zapico, E., Recondo, C., Martínez-Vega, J., Martín, M.P., Riva, J., Pérez, F. y Rodríguez-Silva, F. (2011): Field Fuel Moisture Measurements on Spanish study sites. Department of Geography, University of Alcalá, Spain. Version 1. Available online at: http://www…
C2_9_16	Chuvieco	AraCin9	Aragon	Spain	42.4021	-0.928257		2002-05-23	2002	11	Tree cover, needleleaved, evergreen, closed to open (>15%)	93.1261	1	0.0572803	0.07764	0.0754334	0.111063	Quercus ilex			Chuvieco, E., Yebra, M., Jurdao, S., Aguado, I., Salas, F. J., García, M., Nieto, H., De Santis, A., Cocero, D., Riaño, D., Martínez, S., Zapico, E., Recondo, C., Martínez-Vega, J., Martín, M.P., Riva, J., Pérez, F. y Rodríguez-Silva, F. (2011): Field Fuel Moisture Measurements on Spanish study sites. Department of Geography, University of Alcalá, Spain. Version 1. Available online at: http://www…
C2_9_17	Chuvieco	AraCin9	Aragon	Spain	42.4021	-0.928257		2002-06-08	2002	11	Tree cover, needleleaved, evergreen, closed to open (>15%)	94.8203	1	0.0572803	0.07764	0.0754334	0.111063	Pinus nigra laricio			Chuvieco, E., Yebra, M., Jurdao, S., Aguado, I., Salas, F. J., García, M., Nieto, H., De Santis, A., Cocero, D., Riaño, D., Martínez, S., Zapico, E., Recondo, C., Martínez-Vega, J., Martín, M.P., Riva, J., Pérez, F. y Rodríguez-Silva, F. (2011): Field Fuel Moisture Measurements on Spanish study sites. Department of Geography, University of Alcalá, Spain. Version 1. Available online at: http://www…
C2_9_18	Chuvieco	AraCin9	Aragon	Spain	42.4021	-0.928257		2002-06-08	2002	11	Tree cover, needleleaved, evergreen, closed to open (>15%)	82.9525	1	0.0572803	0.07764	0.0754334	0.111063	Quercus ilex			Chuvieco, E., Yebra, M., Jurdao, S., Aguado, I., Salas, F. J., García, M., Nieto, H., De Santis, A., Cocero, D., Riaño, D., Martínez, S., Zapico, E., Recondo, C., Martínez-Vega, J., Martín, M.P., Riva, J., Pérez, F. y Rodríguez-Silva, F. (2011): Field Fuel Moisture Measurements on Spanish study sites. Department of Geography, University of Alcalá, Spain. Version 1. Available online at: http://www…
C2_9_19	Chuvieco	AraCin9	Aragon	Spain	42.4021	-0.928257		2002-06-24	2002	11	Tree cover, needleleaved, evergreen, closed to open (>15%)	91.3201	1	0.0572803	0.07764	0.0754334	0.111063	Pinus nigra laricio			Chuvieco, E., Yebra, M., Jurdao, S., Aguado, I., Salas, F. J., García, M., Nieto, H., De Santis, A., Cocero, D., Riaño, D., Martínez, S., Zapico, E., Recondo, C., Martínez-Vega, J., Martín, M.P., Riva, J., Pérez, F. y Rodríguez-Silva, F. (2011): Field Fuel Moisture Measurements on Spanish study sites. Department of Geography, University of Alcalá, Spain. Version 1. Available online at: http://www…
C2_9_20	Chuvieco	AraCin9	Aragon	Spain	42.4021	-0.928257		2002-06-24	2002	11	Tree cover, needleleaved, evergreen, closed to open (>15%)	85.3003	1	0.0572803	0.07764	0.0754334	0.111063	Quercus ilex			Chuvieco, E., Yebra, M., Jurdao, S., Aguado, I., Salas, F. J., García, M., Nieto, H., De Santis, A., Cocero, D., Riaño, D., Martínez, S., Zapico, E., Recondo, C., Martínez-Vega, J., Martín, M.P., Riva, J., Pérez, F. y Rodríguez-Silva, F. (2011): Field Fuel Moisture Measurements on Spanish study sites. Department of Geography, University of Alcalá, Spain. Version 1. Available online at: http://www…
C2_9_21	Chuvieco	AraCin9	Aragon	Spain	42.4021	-0.928257		2002-07-10	2002	11	Tree cover, needleleaved, evergreen, closed to open (>15%)	106.851	1	0.0572803	0.07764	0.0754334	0.111063	Pinus nigra laricio			Chuvieco, E., Yebra, M., Jurdao, S., Aguado, I., Salas, F. J., García, M., Nieto, H., De Santis, A., Cocero, D., Riaño, D., Martínez, S., Zapico, E., Recondo, C., Martínez-Vega, J., Martín, M.P., Riva, J., Pérez, F. y Rodríguez-Silva, F. (2011): Field Fuel Moisture Measurements on Spanish study sites. Department of Geography, University of Alcalá, Spain. Version 1. Available online at: http://www…
C2_9_22	Chuvieco	AraCin9	Aragon	Spain	42.4021	-0.928257		2002-07-10	2002	11	Tree cover, needleleaved, evergreen, closed to open (>15%)	79.5242	1	0.0572803	0.07764	0.0754334	0.111063	Quercus ilex			Chuvieco, E., Yebra, M., Jurdao, S., Aguado, I., Salas, F. J., García, M., Nieto, H., De Santis, A., Cocero, D., Riaño, D., Martínez, S., Zapico, E., Recondo, C., Martínez-Vega, J., Martín, M.P., Riva, J., Pérez, F. y Rodríguez-Silva, F. (2011): Field Fuel Moisture Measurements on Spanish study sites. Department of Geography, University of Alcalá, Spain. Version 1. Available online at: http://www…
C2_9_23	Chuvieco	AraCin9	Aragon	Spain	42.4021	-0.928257		2002-08-11	2002	11	Tree cover, needleleaved, evergreen, closed to open (>15%)	107.659	1	0.0572803	0.07764	0.0754334	0.111063	Pinus nigra laricio			Chuvieco, E., Yebra, M., Jurdao, S., Aguado, I., Salas, F. J., García, M., Nieto, H., De Santis, A., Cocero, D., Riaño, D., Martínez, S., Zapico, E., Recondo, C., Martínez-Vega, J., Martín, M.P., Riva, J., Pérez, F. y Rodríguez-Silva, F. (2011): Field Fuel Moisture Measurements on Spanish study sites. Department of Geography, University of Alcalá, Spain. Version 1. Available online at: http://www…
C2_9_24	Chuvieco	AraCin9	Aragon	Spain	42.4021	-0.928257		2002-08-11	2002	11	Tree cover, needleleaved, evergreen, closed to open (>15%)	75.283	1	0.0572803	0.07764	0.0754334	0.111063	Quercus ilex			Chuvieco, E., Yebra, M., Jurdao, S., Aguado, I., Salas, F. J., García, M., Nieto, H., De Santis, A., Cocero, D., Riaño, D., Martínez, S., Zapico, E., Recondo, C., Martínez-Vega, J., Martín, M.P., Riva, J., Pérez, F. y Rodríguez-Silva, F. (2011): Field Fuel Moisture Measurements on Spanish study sites. Department of Geography, University of Alcalá, Spain. Version 1. Available online at: http://www…
C2_9_25	Chuvieco	AraCin9	Aragon	Spain	42.4021	-0.928257		2002-08-27	2002	11	Tree cover, needleleaved, evergreen, closed to open (>15%)	109.171	1	0.0572803	0.07764	0.0754334	0.111063	Pinus nigra laricio			Chuvieco, E., Yebra, M., Jurdao, S., Aguado, I., Salas, F. J., García, M., Nieto, H., De Santis, A., Cocero, D., Riaño, D., Martínez, S., Zapico, E., Recondo, C., Martínez-Vega, J., Martín, M.P., Riva, J., Pérez, F. y Rodríguez-Silva, F. (2011): Field Fuel Moisture Measurements on Spanish study sites. Department of Geography, University of Alcalá, Spain. Version 1. Available online at: http://www…
C2_9_26	Chuvieco	AraCin9	Aragon	Spain	42.4021	-0.928257		2002-08-27	2002	11	Tree cover, needleleaved, evergreen, closed to open (>15%)	72.0831	1	0.0572803	0.07764	0.0754334	0.111063	Quercus ilex			Chuvieco, E., Yebra, M., Jurdao, S., Aguado, I., Salas, F. J., García, M., Nieto, H., De Santis, A., Cocero, D., Riaño, D., Martínez, S., Zapico, E., Recondo, C., Martínez-Vega, J., Martín, M.P., Riva, J., Pérez, F. y Rodríguez-Silva, F. (2011): Field Fuel Moisture Measurements on Spanish study sites. Department of Geography, University of Alcalá, Spain. Version 1. Available online at: http://www…
C2_9_27	Chuvieco	AraCin9	Aragon	Spain	42.4021	-0.928257		2002-09-12	2002	11	Tree cover, needleleaved, evergreen, closed to open (>15%)	108.076	1	0.0572803	0.07764	0.0754334	0.111063	Pinus nigra laricio			Chuvieco, E., Yebra, M., Jurdao, S., Aguado, I., Salas, F. J., García, M., Nieto, H., De Santis, A., Cocero, D., Riaño, D., Martínez, S., Zapico, E., Recondo, C., Martínez-Vega, J., Martín, M.P., Riva, J., Pérez, F. y Rodríguez-Silva, F. (2011): Field Fuel Moisture Measurements on Spanish study sites. Department of Geography, University of Alcalá, Spain. Version 1. Available online at: http://www…
C2_9_28	Chuvieco	AraCin9	Aragon	Spain	42.4021	-0.928257		2002-09-12	2002	11	Tree cover, needleleaved, evergreen, closed to open (>15%)	77.0398	1	0.0572803	0.07764	0.0754334	0.111063	Quercus ilex			Chuvieco, E., Yebra, M., Jurdao, S., Aguado, I., Salas, F. J., García, M., Nieto, H., De Santis, A., Cocero, D., Riaño, D., Martínez, S., Zapico, E., Recondo, C., Martínez-Vega, J., Martín, M.P., Riva, J., Pérez, F. y Rodríguez-Silva, F. (2011): Field Fuel Moisture Measurements on Spanish study sites. Department of Geography, University of Alcalá, Spain. Version 1. Available online at: http://www…
C2_10_1	Chuvieco	AraIBE13	Aragon	Spain	41.2541	-1.21567		2001-04-12	2001	11	Tree cover, needleleaved, evergreen, closed to open (>15%)	155.049	1	0.0473399	0.070689	0.076651	0.110125	Cistus ladanifer			Chuvieco, E., Yebra, M., Jurdao, S., Aguado, I., Salas, F. J., García, M., Nieto, H., De Santis, A., Cocero, D., Riaño, D., Martínez, S., Zapico, E., Recondo, C., Martínez-Vega, J., Martín, M.P., Riva, J., Pérez, F. y Rodríguez-Silva, F. (2011): Field Fuel Moisture Measurements on Spanish study sites. Department of Geography, University of Alcalá, Spain. Version 1. Available online at: http://www…
C2_10_2	Chuvieco	AraIBE13	Aragon	Spain	41.2541	-1.21567		2001-04-12	2001	11	Tree cover, needleleaved, evergreen, closed to open (>15%)	179.046	1	0.0473399	0.070689	0.076651	0.110125	Rosmarinus officinalis			Chuvieco, E., Yebra, M., Jurdao, S., Aguado, I., Salas, F. J., García, M., Nieto, H., De Santis, A., Cocero, D., Riaño, D., Martínez, S., Zapico, E., Recondo, C., Martínez-Vega, J., Martín, M.P., Riva, J., Pérez, F. y Rodríguez-Silva, F. (2011): Field Fuel Moisture Measurements on Spanish study sites. Department of Geography, University of Alcalá, Spain. Version 1. Available online at: http://www…
C2_10_3	Chuvieco	AraIBE13	Aragon	Spain	41.2541	-1.21567		2001-04-12	2001	11	Tree cover, needleleaved, evergreen, closed to open (>15%)	71.7335	1	0.0473399	0.070689	0.076651	0.110125	Quercus ilex			Chuvieco, E., Yebra, M., Jurdao, S., Aguado, I., Salas, F. J., García, M., Nieto, H., De Santis, A., Cocero, D., Riaño, D., Martínez, S., Zapico, E., Recondo, C., Martínez-Vega, J., Martín, M.P., Riva, J., Pérez, F. y Rodríguez-Silva, F. (2011): Field Fuel Moisture Measurements on Spanish study sites. Department of Geography, University of Alcalá, Spain. Version 1. Available online at: http://www…
C2_10_4	Chuvieco	AraIBE13	Aragon	Spain	41.2541	-1.21567		2001-04-12	2001	11	Tree cover, needleleaved, evergreen, closed to open (>15%)	103.565	1	0.0473399	0.070689	0.076651	0.110125	Quercus faginea			Chuvieco, E., Yebra, M., Jurdao, S., Aguado, I., Salas, F. J., García, M., Nieto, H., De Santis, A., Cocero, D., Riaño, D., Martínez, S., Zapico, E., Recondo, C., Martínez-Vega, J., Martín, M.P., Riva, J., Pérez, F. y Rodríguez-Silva, F. (2011): Field Fuel Moisture Measurements on Spanish study sites. Department of Geography, University of Alcalá, Spain. Version 1. Available online at: http://www…
C2_10_5	Chuvieco	AraIBE13	Aragon	Spain	41.2541	-1.21567		2001-04-29	2001	11	Tree cover, needleleaved, evergreen, closed to open (>15%)	161.287	1	0.0473399	0.070689	0.076651	0.110125	Cistus ladanifer			Chuvieco, E., Yebra, M., Jurdao, S., Aguado, I., Salas, F. J., García, M., Nieto, H., De Santis, A., Cocero, D., Riaño, D., Martínez, S., Zapico, E., Recondo, C., Martínez-Vega, J., Martín, M.P., Riva, J., Pérez, F. y Rodríguez-Silva, F. (2011): Field Fuel Moisture Measurements on Spanish study sites. Department of Geography, University of Alcalá, Spain. Version 1. Available online at: http://www…
C2_10_6	Chuvieco	AraIBE13	Aragon	Spain	41.2541	-1.21567		2001-04-29	2001	11	Tree cover, needleleaved, evergreen, closed to open (>15%)	110.143	1	0.0473399	0.070689	0.076651	0.110125	Rosmarinus officinalis			Chuvieco, E., Yebra, M., Jurdao, S., Aguado, I., Salas, F. J., García, M., Nieto, H., De Santis, A., Cocero, D., Riaño, D., Martínez, S., Zapico, E., Recondo, C., Martínez-Vega, J., Martín, M.P., Riva, J., Pérez, F. y Rodríguez-Silva, F. (2011): Field Fuel Moisture Measurements on Spanish study sites. Department of Geography, University of Alcalá, Spain. Version 1. Available online at: http://www…
C2_10_7	Chuvieco	AraIBE13	Aragon	Spain	41.2541	-1.21567		2001-04-29	2001	11	Tree cover, needleleaved, evergreen, closed to open (>15%)	87.1753	1	0.0473399	0.070689	0.076651	0.110125	Quercus ilex			Chuvieco, E., Yebra, M., Jurdao, S., Aguado, I., Salas, F. J., García, M., Nieto, H., De Santis, A., Cocero, D., Riaño, D., Martínez, S., Zapico, E., Recondo, C., Martínez-Vega, J., Martín, M.P., Riva, J., Pérez, F. y Rodríguez-Silva, F. (2011): Field Fuel Moisture Measurements on Spanish study sites. Department of Geography, University of Alcalá, Spain. Version 1. Available online at: http://www…
C2_10_8	Chuvieco	AraIBE13	Aragon	Spain	41.2541	-1.21567		2001-04-29	2001	11	Tree cover, needleleaved, evergreen, closed to open (>15%)	170.446	1	0.0473399	0.070689	0.076651	0.110125	Quercus faginea			Chuvieco, E., Yebra, M., Jurdao, S., Aguado, I., Salas, F. J., García, M., Nieto, H., De Santis, A., Cocero, D., Riaño, D., Martínez, S., Zapico, E., Recondo, C., Martínez-Vega, J., Martín, M.P., Riva, J., Pérez, F. y Rodríguez-Silva, F. (2011): Field Fuel Moisture Measurements on Spanish study sites. Department of Geography, University of Alcalá, Spain. Version 1. Available online at: http://www…
C2_10_9	Chuvieco	AraIBE13	Aragon	Spain	41.2541	-1.21567		2001-05-15	2001	11	Tree cover, needleleaved, evergreen, closed to open (>15%)	112.917	1	0.0473399	0.070689	0.076651	0.110125	Cistus ladanifer			Chuvieco, E., Yebra, M., Jurdao, S., Aguado, I., Salas, F. J., García, M., Nieto, H., De Santis, A., Cocero, D., Riaño, D., Martínez, S., Zapico, E., Recondo, C., Martínez-Vega, J., Martín, M.P., Riva, J., Pérez, F. y Rodríguez-Silva, F. (2011): Field Fuel Moisture Measurements on Spanish study sites. Department of Geography, University of Alcalá, Spain. Version 1. Available online at: http://www…
C2_10_10	Chuvieco	AraIBE13	Aragon	Spain	41.2541	-1.21567		2001-05-15	2001	11	Tree cover, needleleaved, evergreen, closed to open (>15%)	120.555	1	0.0473399	0.070689	0.076651	0.110125	Rosmarinus officinalis			Chuvieco, E., Yebra, M., Jurdao, S., Aguado, I., Salas, F. J., García, M., Nieto, H., De Santis, A., Cocero, D., Riaño, D., Martínez, S., Zapico, E., Recondo, C., Martínez-Vega, J., Martín, M.P., Riva, J., Pérez, F. y Rodríguez-Silva, F. (2011): Field Fuel Moisture Measurements on Spanish study sites. Department of Geography, University of Alcalá, Spain. Version 1. Available online at: http://www…
C2_10_11	Chuvieco	AraIBE13	Aragon	Spain	41.2541	-1.21567		2001-05-15	2001	11	Tree cover, needleleaved, evergreen, closed to open (>15%)	82.7192	1	0.0473399	0.070689	0.076651	0.110125	Quercus ilex			Chuvieco, E., Yebra, M., Jurdao, S., Aguado, I., Salas, F. J., García, M., Nieto, H., De Santis, A., Cocero, D., Riaño, D., Martínez, S., Zapico, E., Recondo, C., Martínez-Vega, J., Martín, M.P., Riva, J., Pérez, F. y Rodríguez-Silva, F. (2011): Field Fuel Moisture Measurements on Spanish study sites. Department of Geography, University of Alcalá, Spain. Version 1. Available online at: http://www…
C2_10_12	Chuvieco	AraIBE13	Aragon	Spain	41.2541	-1.21567		2001-05-15	2001	11	Tree cover, needleleaved, evergreen, closed to open (>15%)	135.25	1	0.0473399	0.070689	0.076651	0.110125	Quercus faginea			Chuvieco, E., Yebra, M., Jurdao, S., Aguado, I., Salas, F. J., García, M., Nieto, H., De Santis, A., Cocero, D., Riaño, D., Martínez, S., Zapico, E., Recondo, C., Martínez-Vega, J., Martín, M.P., Riva, J., Pérez, F. y Rodríguez-Silva, F. (2011): Field Fuel Moisture Measurements on Spanish study sites. Department of Geography, University of Alcalá, Spain. Version 1. Available online at: http://www…
C2_10_13	Chuvieco	AraIBE13	Aragon	Spain	41.2541	-1.21567		2001-05-31	2001	11	Tree cover, needleleaved, evergreen, closed to open (>15%)	110.073	1	0.0473399	0.070689	0.076651	0.110125	Cistus ladanifer			Chuvieco, E., Yebra, M., Jurdao, S., Aguado, I., Salas, F. J., García, M., Nieto, H., De Santis, A., Cocero, D., Riaño, D., Martínez, S., Zapico, E., Recondo, C., Martínez-Vega, J., Martín, M.P., Riva, J., Pérez, F. y Rodríguez-Silva, F. (2011): Field Fuel Moisture Measurements on Spanish study sites. Department of Geography, University of Alcalá, Spain. Version 1. Available online at: http://www…
C2_10_14	Chuvieco	AraIBE13	Aragon	Spain	41.2541	-1.21567		2001-05-31	2001	11	Tree cover, needleleaved, evergreen, closed to open (>15%)	130.698	1	0.0473399	0.070689	0.076651	0.110125	Rosmarinus officinalis			Chuvieco, E., Yebra, M., Jurdao, S., Aguado, I., Salas, F. J., García, M., Nieto, H., De Santis, A., Cocero, D., Riaño, D., Martínez, S., Zapico, E., Recondo, C., Martínez-Vega, J., Martín, M.P., Riva, J., Pérez, F. y Rodríguez-Silva, F. (2011): Field Fuel Moisture Measurements on Spanish study sites. Department of Geography, University of Alcalá, Spain. Version 1. Available online at: http://www…
C2_10_15	Chuvieco	AraIBE13	Aragon	Spain	41.2541	-1.21567		2001-05-31	2001	11	Tree cover, needleleaved, evergreen, closed to open (>15%)	94.4178	1	0.0473399	0.070689	0.076651	0.110125	Quercus ilex			Chuvieco, E., Yebra, M., Jurdao, S., Aguado, I., Salas, F. J., García, M., Nieto, H., De Santis, A., Cocero, D., Riaño, D., Martínez, S., Zapico, E., Recondo, C., Martínez-Vega, J., Martín, M.P., Riva, J., Pérez, F. y Rodríguez-Silva, F. (2011): Field Fuel Moisture Measurements on Spanish study sites. Department of Geography, University of Alcalá, Spain. Version 1. Available online at: http://www…
C2_10_16	Chuvieco	AraIBE13	Aragon	Spain	41.2541	-1.21567		2001-05-31	2001	11	Tree cover, needleleaved, evergreen, closed to open (>15%)	127.078	1	0.0473399	0.070689	0.076651	0.110125	Quercus faginea			Chuvieco, E., Yebra, M., Jurdao, S., Aguado, I., Salas, F. J., García, M., Nieto, H., De Santis, A., Cocero, D., Riaño, D., Martínez, S., Zapico, E., Recondo, C., Martínez-Vega, J., Martín, M.P., Riva, J., Pérez, F. y Rodríguez-Silva, F. (2011): Field Fuel Moisture Measurements on Spanish study sites. Department of Geography, University of Alcalá, Spain. Version 1. Available online at: http://www…
C2_10_17	Chuvieco	AraIBE13	Aragon	Spain	41.2541	-1.21567		2001-06-16	2001	11	Tree cover, needleleaved, evergreen, closed to open (>15%)	91.1861	1	0.0473399	0.070689	0.076651	0.110125	Cistus ladanifer			Chuvieco, E., Yebra, M., Jurdao, S., Aguado, I., Salas, F. J., García, M., Nieto, H., De Santis, A., Cocero, D., Riaño, D., Martínez, S., Zapico, E., Recondo, C., Martínez-Vega, J., Martín, M.P., Riva, J., Pérez, F. y Rodríguez-Silva, F. (2011): Field Fuel Moisture Measurements on Spanish study sites. Department of Geography, University of Alcalá, Spain. Version 1. Available online at: http://www…
C2_10_18	Chuvieco	AraIBE13	Aragon	Spain	41.2541	-1.21567		2001-06-16	2001	11	Tree cover, needleleaved, evergreen, closed to open (>15%)	92.1692	1	0.0473399	0.070689	0.076651	0.110125	Rosmarinus officinalis			Chuvieco, E., Yebra, M., Jurdao, S., Aguado, I., Salas, F. J., García, M., Nieto, H., De Santis, A., Cocero, D., Riaño, D., Martínez, S., Zapico, E., Recondo, C., Martínez-Vega, J., Martín, M.P., Riva, J., Pérez, F. y Rodríguez-Silva, F. (2011): Field Fuel Moisture Measurements on Spanish study sites. Department of Geography, University of Alcalá, Spain. Version 1. Available online at: http://www…
C2_10_19	Chuvieco	AraIBE13	Aragon	Spain	41.2541	-1.21567		2001-06-16	2001	11	Tree cover, needleleaved, evergreen, closed to open (>15%)	84.511	1	0.0473399	0.070689	0.076651	0.110125	Quercus ilex			Chuvieco, E., Yebra, M., Jurdao, S., Aguado, I., Salas, F. J., García, M., Nieto, H., De Santis, A., Cocero, D., Riaño, D., Martínez, S., Zapico, E., Recondo, C., Martínez-Vega, J., Martín, M.P., Riva, J., Pérez, F. y Rodríguez-Silva, F. (2011): Field Fuel Moisture Measurements on Spanish study sites. Department of Geography, University of Alcalá, Spain. Version 1. Available online at: http://www…
C2_10_20	Chuvieco	AraIBE13	Aragon	Spain	41.2541	-1.21567		2001-06-16	2001	11	Tree cover, needleleaved, evergreen, closed to open (>15%)	104.063	1	0.0473399	0.070689	0.076651	0.110125	Quercus faginea			Chuvieco, E., Yebra, M., Jurdao, S., Aguado, I., Salas, F. J., García, M., Nieto, H., De Santis, A., Cocero, D., Riaño, D., Martínez, S., Zapico, E., Recondo, C., Martínez-Vega, J., Martín, M.P., Riva, J., Pérez, F. y Rodríguez-Silva, F. (2011): Field Fuel Moisture Measurements on Spanish study sites. Department of Geography, University of Alcalá, Spain. Version 1. Available online at: http://www…
C2_10_21	Chuvieco	AraIBE13	Aragon	Spain	41.2541	-1.21567		2001-07-02	2001	11	Tree cover, needleleaved, evergreen, closed to open (>15%)	51.4792	1	0.0473399	0.070689	0.076651	0.110125	Cistus ladanifer			Chuvieco, E., Yebra, M., Jurdao, S., Aguado, I., Salas, F. J., García, M., Nieto, H., De Santis, A., Cocero, D., Riaño, D., Martínez, S., Zapico, E., Recondo, C., Martínez-Vega, J., Martín, M.P., Riva, J., Pérez, F. y Rodríguez-Silva, F. (2011): Field Fuel Moisture Measurements on Spanish study sites. Department of Geography, University of Alcalá, Spain. Version 1. Available online at: http://www…
C2_10_22	Chuvieco	AraIBE13	Aragon	Spain	41.2541	-1.21567		2001-07-02	2001	11	Tree cover, needleleaved, evergreen, closed to open (>15%)	40.9516	1	0.0473399	0.070689	0.076651	0.110125	Rosmarinus officinalis			Chuvieco, E., Yebra, M., Jurdao, S., Aguado, I., Salas, F. J., García, M., Nieto, H., De Santis, A., Cocero, D., Riaño, D., Martínez, S., Zapico, E., Recondo, C., Martínez-Vega, J., Martín, M.P., Riva, J., Pérez, F. y Rodríguez-Silva, F. (2011): Field Fuel Moisture Measurements on Spanish study sites. Department of Geography, University of Alcalá, Spain. Version 1. Available online at: http://www…
C2_10_23	Chuvieco	AraIBE13	Aragon	Spain	41.2541	-1.21567		2001-07-02	2001	11	Tree cover, needleleaved, evergreen, closed to open (>15%)	79.1568	1	0.0473399	0.070689	0.076651	0.110125	Quercus ilex			Chuvieco, E., Yebra, M., Jurdao, S., Aguado, I., Salas, F. J., García, M., Nieto, H., De Santis, A., Cocero, D., Riaño, D., Martínez, S., Zapico, E., Recondo, C., Martínez-Vega, J., Martín, M.P., Riva, J., Pérez, F. y Rodríguez-Silva, F. (2011): Field Fuel Moisture Measurements on Spanish study sites. Department of Geography, University of Alcalá, Spain. Version 1. Available online at: http://www…
C2_10_24	Chuvieco	AraIBE13	Aragon	Spain	41.2541	-1.21567		2001-07-02	2001	11	Tree cover, needleleaved, evergreen, closed to open (>15%)	93.2794	1	0.0473399	0.070689	0.076651	0.110125	Quercus faginea			Chuvieco, E., Yebra, M., Jurdao, S., Aguado, I., Salas, F. J., García, M., Nieto, H., De Santis, A., Cocero, D., Riaño, D., Martínez, S., Zapico, E., Recondo, C., Martínez-Vega, J., Martín, M.P., Riva, J., Pérez, F. y Rodríguez-Silva, F. (2011): Field Fuel Moisture Measurements on Spanish study sites. Department of Geography, University of Alcalá, Spain. Version 1. Available online at: http://www…
C2_10_25	Chuvieco	AraIBE13	Aragon	Spain	41.2541	-1.21567		2001-07-18	2001	11	Tree cover, needleleaved, evergreen, closed to open (>15%)	50.165	1	0.0473399	0.070689	0.076651	0.110125	Cistus ladanifer			Chuvieco, E., Yebra, M., Jurdao, S., Aguado, I., Salas, F. J., García, M., Nieto, H., De Santis, A., Cocero, D., Riaño, D., Martínez, S., Zapico, E., Recondo, C., Martínez-Vega, J., Martín, M.P., Riva, J., Pérez, F. y Rodríguez-Silva, F. (2011): Field Fuel Moisture Measurements on Spanish study sites. Department of Geography, University of Alcalá, Spain. Version 1. Available online at: http://www…
C2_10_26	Chuvieco	AraIBE13	Aragon	Spain	41.2541	-1.21567		2001-07-18	2001	11	Tree cover, needleleaved, evergreen, closed to open (>15%)	52.0295	1	0.0473399	0.070689	0.076651	0.110125	Rosmarinus officinalis			Chuvieco, E., Yebra, M., Jurdao, S., Aguado, I., Salas, F. J., García, M., Nieto, H., De Santis, A., Cocero, D., Riaño, D., Martínez, S., Zapico, E., Recondo, C., Martínez-Vega, J., Martín, M.P., Riva, J., Pérez, F. y Rodríguez-Silva, F. (2011): Field Fuel Moisture Measurements on Spanish study sites. Department of Geography, University of Alcalá, Spain. Version 1. Available online at: http://www…
C2_10_27	Chuvieco	AraIBE13	Aragon	Spain	41.2541	-1.21567		2001-07-18	2001	11	Tree cover, needleleaved, evergreen, closed to open (>15%)	73.4118	1	0.0473399	0.070689	0.076651	0.110125	Quercus ilex			Chuvieco, E., Yebra, M., Jurdao, S., Aguado, I., Salas, F. J., García, M., Nieto, H., De Santis, A., Cocero, D., Riaño, D., Martínez, S., Zapico, E., Recondo, C., Martínez-Vega, J., Martín, M.P., Riva, J., Pérez, F. y Rodríguez-Silva, F. (2011): Field Fuel Moisture Measurements on Spanish study sites. Department of Geography, University of Alcalá, Spain. Version 1. Available online at: http://www…
C2_10_28	Chuvieco	AraIBE13	Aragon	Spain	41.2541	-1.21567		2001-07-18	2001	11	Tree cover, needleleaved, evergreen, closed to open (>15%)	90.6874	1	0.0473399	0.070689	0.076651	0.110125	Quercus faginea			Chuvieco, E., Yebra, M., Jurdao, S., Aguado, I., Salas, F. J., García, M., Nieto, H., De Santis, A., Cocero, D., Riaño, D., Martínez, S., Zapico, E., Recondo, C., Martínez-Vega, J., Martín, M.P., Riva, J., Pérez, F. y Rodríguez-Silva, F. (2011): Field Fuel Moisture Measurements on Spanish study sites. Department of Geography, University of Alcalá, Spain. Version 1. Available online at: http://www…
C2_10_29	Chuvieco	AraIBE13	Aragon	Spain	41.2541	-1.21567		2001-08-03	2001	11	Tree cover, needleleaved, evergreen, closed to open (>15%)	37.9925	1	0.0473399	0.070689	0.076651	0.110125	Cistus ladanifer			Chuvieco, E., Yebra, M., Jurdao, S., Aguado, I., Salas, F. J., García, M., Nieto, H., De Santis, A., Cocero, D., Riaño, D., Martínez, S., Zapico, E., Recondo, C., Martínez-Vega, J., Martín, M.P., Riva, J., Pérez, F. y Rodríguez-Silva, F. (2011): Field Fuel Moisture Measurements on Spanish study sites. Department of Geography, University of Alcalá, Spain. Version 1. Available online at: http://www…
C2_10_30	Chuvieco	AraIBE13	Aragon	Spain	41.2541	-1.21567		2001-08-03	2001	11	Tree cover, needleleaved, evergreen, closed to open (>15%)	40.558	1	0.0473399	0.070689	0.076651	0.110125	Rosmarinus officinalis			Chuvieco, E., Yebra, M., Jurdao, S., Aguado, I., Salas, F. J., García, M., Nieto, H., De Santis, A., Cocero, D., Riaño, D., Martínez, S., Zapico, E., Recondo, C., Martínez-Vega, J., Martín, M.P., Riva, J., Pérez, F. y Rodríguez-Silva, F. (2011): Field Fuel Moisture Measurements on Spanish study sites. Department of Geography, University of Alcalá, Spain. Version 1. Available online at: http://www…
C2_10_31	Chuvieco	AraIBE13	Aragon	Spain	41.2541	-1.21567		2001-08-03	2001	11	Tree cover, needleleaved, evergreen, closed to open (>15%)	68.8394	1	0.0473399	0.070689	0.076651	0.110125	Quercus ilex			Chuvieco, E., Yebra, M., Jurdao, S., Aguado, I., Salas, F. J., García, M., Nieto, H., De Santis, A., Cocero, D., Riaño, D., Martínez, S., Zapico, E., Recondo, C., Martínez-Vega, J., Martín, M.P., Riva, J., Pérez, F. y Rodríguez-Silva, F. (2011): Field Fuel Moisture Measurements on Spanish study sites. Department of Geography, University of Alcalá, Spain. Version 1. Available online at: http://www…
C2_10_32	Chuvieco	AraIBE13	Aragon	Spain	41.2541	-1.21567		2001-08-03	2001	11	Tree cover, needleleaved, evergreen, closed to open (>15%)	86.8002	1	0.0473399	0.070689	0.076651	0.110125	Quercus faginea			Chuvieco, E., Yebra, M., Jurdao, S., Aguado, I., Salas, F. J., García, M., Nieto, H., De Santis, A., Cocero, D., Riaño, D., Martínez, S., Zapico, E., Recondo, C., Martínez-Vega, J., Martín, M.P., Riva, J., Pérez, F. y Rodríguez-Silva, F. (2011): Field Fuel Moisture Measurements on Spanish study sites. Department of Geography, University of Alcalá, Spain. Version 1. Available online at: http://www…
C2_10_33	Chuvieco	AraIBE13	Aragon	Spain	41.2541	-1.21567		2001-08-19	2001	11	Tree cover, needleleaved, evergreen, closed to open (>15%)	37.476	1	0.0473399	0.070689	0.076651	0.110125	Cistus ladanifer			Chuvieco, E., Yebra, M., Jurdao, S., Aguado, I., Salas, F. J., García, M., Nieto, H., De Santis, A., Cocero, D., Riaño, D., Martínez, S., Zapico, E., Recondo, C., Martínez-Vega, J., Martín, M.P., Riva, J., Pérez, F. y Rodríguez-Silva, F. (2011): Field Fuel Moisture Measurements on Spanish study sites. Department of Geography, University of Alcalá, Spain. Version 1. Available online at: http://www…
C2_10_34	Chuvieco	AraIBE13	Aragon	Spain	41.2541	-1.21567		2001-08-19	2001	11	Tree cover, needleleaved, evergreen, closed to open (>15%)	37.2983	1	0.0473399	0.070689	0.076651	0.110125	Rosmarinus officinalis			Chuvieco, E., Yebra, M., Jurdao, S., Aguado, I., Salas, F. J., García, M., Nieto, H., De Santis, A., Cocero, D., Riaño, D., Martínez, S., Zapico, E., Recondo, C., Martínez-Vega, J., Martín, M.P., Riva, J., Pérez, F. y Rodríguez-Silva, F. (2011): Field Fuel Moisture Measurements on Spanish study sites. Department of Geography, University of Alcalá, Spain. Version 1. Available online at: http://www…
C2_10_35	Chuvieco	AraIBE13	Aragon	Spain	41.2541	-1.21567		2001-08-19	2001	11	Tree cover, needleleaved, evergreen, closed to open (>15%)	62.4836	1	0.0473399	0.070689	0.076651	0.110125	Quercus ilex			Chuvieco, E., Yebra, M., Jurdao, S., Aguado, I., Salas, F. J., García, M., Nieto, H., De Santis, A., Cocero, D., Riaño, D., Martínez, S., Zapico, E., Recondo, C., Martínez-Vega, J., Martín, M.P., Riva, J., Pérez, F. y Rodríguez-Silva, F. (2011): Field Fuel Moisture Measurements on Spanish study sites. Department of Geography, University of Alcalá, Spain. Version 1. Available online at: http://www…
C2_10_36	Chuvieco	AraIBE13	Aragon	Spain	41.2541	-1.21567		2001-08-19	2001	11	Tree cover, needleleaved, evergreen, closed to open (>15%)	78.7989	1	0.0473399	0.070689	0.076651	0.110125	Quercus faginea			Chuvieco, E., Yebra, M., Jurdao, S., Aguado, I., Salas, F. J., García, M., Nieto, H., De Santis, A., Cocero, D., Riaño, D., Martínez, S., Zapico, E., Recondo, C., Martínez-Vega, J., Martín, M.P., Riva, J., Pérez, F. y Rodríguez-Silva, F. (2011): Field Fuel Moisture Measurements on Spanish study sites. Department of Geography, University of Alcalá, Spain. Version 1. Available online at: http://www…
C2_10_37	Chuvieco	AraIBE13	Aragon	Spain	41.2541	-1.21567		2001-09-04	2001	11	Tree cover, needleleaved, evergreen, closed to open (>15%)	64.6397	1	0.0473399	0.070689	0.076651	0.110125	Cistus ladanifer			Chuvieco, E., Yebra, M., Jurdao, S., Aguado, I., Salas, F. J., García, M., Nieto, H., De Santis, A., Cocero, D., Riaño, D., Martínez, S., Zapico, E., Recondo, C., Martínez-Vega, J., Martín, M.P., Riva, J., Pérez, F. y Rodríguez-Silva, F. (2011): Field Fuel Moisture Measurements on Spanish study sites. Department of Geography, University of Alcalá, Spain. Version 1. Available online at: http://www…
C2_10_38	Chuvieco	AraIBE13	Aragon	Spain	41.2541	-1.21567		2001-09-04	2001	11	Tree cover, needleleaved, evergreen, closed to open (>15%)	57.3841	1	0.0473399	0.070689	0.076651	0.110125	Rosmarinus officinalis			Chuvieco, E., Yebra, M., Jurdao, S., Aguado, I., Salas, F. J., García, M., Nieto, H., De Santis, A., Cocero, D., Riaño, D., Martínez, S., Zapico, E., Recondo, C., Martínez-Vega, J., Martín, M.P., Riva, J., Pérez, F. y Rodríguez-Silva, F. (2011): Field Fuel Moisture Measurements on Spanish study sites. Department of Geography, University of Alcalá, Spain. Version 1. Available online at: http://www…
C2_10_39	Chuvieco	AraIBE13	Aragon	Spain	41.2541	-1.21567		2001-09-04	2001	11	Tree cover, needleleaved, evergreen, closed to open (>15%)	69.0171	1	0.0473399	0.070689	0.076651	0.110125	Quercus ilex			Chuvieco, E., Yebra, M., Jurdao, S., Aguado, I., Salas, F. J., García, M., Nieto, H., De Santis, A., Cocero, D., Riaño, D., Martínez, S., Zapico, E., Recondo, C., Martínez-Vega, J., Martín, M.P., Riva, J., Pérez, F. y Rodríguez-Silva, F. (2011): Field Fuel Moisture Measurements on Spanish study sites. Department of Geography, University of Alcalá, Spain. Version 1. Available online at: http://www…
C2_10_40	Chuvieco	AraIBE13	Aragon	Spain	41.2541	-1.21567		2001-09-04	2001	11	Tree cover, needleleaved, evergreen, closed to open (>15%)	74.0459	1	0.0473399	0.070689	0.076651	0.110125	Quercus faginea			Chuvieco, E., Yebra, M., Jurdao, S., Aguado, I., Salas, F. J., García, M., Nieto, H., De Santis, A., Cocero, D., Riaño, D., Martínez, S., Zapico, E., Recondo, C., Martínez-Vega, J., Martín, M.P., Riva, J., Pérez, F. y Rodríguez-Silva, F. (2011): Field Fuel Moisture Measurements on Spanish study sites. Department of Geography, University of Alcalá, Spain. Version 1. Available online at: http://www…
C2_10_41	Chuvieco	AraIBE13	Aragon	Spain	41.2541	-1.21567		2001-09-20	2001	11	Tree cover, needleleaved, evergreen, closed to open (>15%)	40.915	1	0.0473399	0.070689	0.076651	0.110125	Cistus ladanifer			Chuvieco, E., Yebra, M., Jurdao, S., Aguado, I., Salas, F. J., García, M., Nieto, H., De Santis, A., Cocero, D., Riaño, D., Martínez, S., Zapico, E., Recondo, C., Martínez-Vega, J., Martín, M.P., Riva, J., Pérez, F. y Rodríguez-Silva, F. (2011): Field Fuel Moisture Measurements on Spanish study sites. Department of Geography, University of Alcalá, Spain. Version 1. Available online at: http://www…
C2_10_42	Chuvieco	AraIBE13	Aragon	Spain	41.2541	-1.21567		2001-09-20	2001	11	Tree cover, needleleaved, evergreen, closed to open (>15%)	39.375	1	0.0473399	0.070689	0.076651	0.110125	Rosmarinus officinalis			Chuvieco, E., Yebra, M., Jurdao, S., Aguado, I., Salas, F. J., García, M., Nieto, H., De Santis, A., Cocero, D., Riaño, D., Martínez, S., Zapico, E., Recondo, C., Martínez-Vega, J., Martín, M.P., Riva, J., Pérez, F. y Rodríguez-Silva, F. (2011): Field Fuel Moisture Measurements on Spanish study sites. Department of Geography, University of Alcalá, Spain. Version 1. Available online at: http://www…
C2_10_43	Chuvieco	AraIBE13	Aragon	Spain	41.2541	-1.21567		2001-09-20	2001	11	Tree cover, needleleaved, evergreen, closed to open (>15%)	68.2497	1	0.0473399	0.070689	0.076651	0.110125	Quercus ilex			Chuvieco, E., Yebra, M., Jurdao, S., Aguado, I., Salas, F. J., García, M., Nieto, H., De Santis, A., Cocero, D., Riaño, D., Martínez, S., Zapico, E., Recondo, C., Martínez-Vega, J., Martín, M.P., Riva, J., Pérez, F. y Rodríguez-Silva, F. (2011): Field Fuel Moisture Measurements on Spanish study sites. Department of Geography, University of Alcalá, Spain. Version 1. Available online at: http://www…
C2_10_44	Chuvieco	AraIBE13	Aragon	Spain	41.2541	-1.21567		2001-09-20	2001	11	Tree cover, needleleaved, evergreen, closed to open (>15%)	80.4455	1	0.0473399	0.070689	0.076651	0.110125	Quercus faginea			Chuvieco, E., Yebra, M., Jurdao, S., Aguado, I., Salas, F. J., García, M., Nieto, H., De Santis, A., Cocero, D., Riaño, D., Martínez, S., Zapico, E., Recondo, C., Martínez-Vega, J., Martín, M.P., Riva, J., Pérez, F. y Rodríguez-Silva, F. (2011): Field Fuel Moisture Measurements on Spanish study sites. Department of Geography, University of Alcalá, Spain. Version 1. Available online at: http://www…
C2_10_45	Chuvieco	AraIBE13	Aragon	Spain	41.2541	-1.21567		2002-04-08	2002	11	Tree cover, needleleaved, evergreen, closed to open (>15%)	64.6523	1	0.0473399	0.070689	0.076651	0.110125	Cistus ladanifer			Chuvieco, E., Yebra, M., Jurdao, S., Aguado, I., Salas, F. J., García, M., Nieto, H., De Santis, A., Cocero, D., Riaño, D., Martínez, S., Zapico, E., Recondo, C., Martínez-Vega, J., Martín, M.P., Riva, J., Pérez, F. y Rodríguez-Silva, F. (2011): Field Fuel Moisture Measurements on Spanish study sites. Department of Geography, University of Alcalá, Spain. Version 1. Available online at: http://www…
C2_10_46	Chuvieco	AraIBE13	Aragon	Spain	41.2541	-1.21567		2002-04-08	2002	11	Tree cover, needleleaved, evergreen, closed to open (>15%)	71.9113	1	0.0473399	0.070689	0.076651	0.110125	Rosmarinus officinalis			Chuvieco, E., Yebra, M., Jurdao, S., Aguado, I., Salas, F. J., García, M., Nieto, H., De Santis, A., Cocero, D., Riaño, D., Martínez, S., Zapico, E., Recondo, C., Martínez-Vega, J., Martín, M.P., Riva, J., Pérez, F. y Rodríguez-Silva, F. (2011): Field Fuel Moisture Measurements on Spanish study sites. Department of Geography, University of Alcalá, Spain. Version 1. Available online at: http://www…
C2_10_47	Chuvieco	AraIBE13	Aragon	Spain	41.2541	-1.21567		2002-04-08	2002	11	Tree cover, needleleaved, evergreen, closed to open (>15%)	62.8713	1	0.0473399	0.070689	0.076651	0.110125	Quercus ilex			Chuvieco, E., Yebra, M., Jurdao, S., Aguado, I., Salas, F. J., García, M., Nieto, H., De Santis, A., Cocero, D., Riaño, D., Martínez, S., Zapico, E., Recondo, C., Martínez-Vega, J., Martín, M.P., Riva, J., Pérez, F. y Rodríguez-Silva, F. (2011): Field Fuel Moisture Measurements on Spanish study sites. Department of Geography, University of Alcalá, Spain. Version 1. Available online at: http://www…
C2_10_48	Chuvieco	AraIBE13	Aragon	Spain	41.2541	-1.21567		2002-04-24	2002	11	Tree cover, needleleaved, evergreen, closed to open (>15%)	114.337	1	0.0473399	0.070689	0.076651	0.110125	Cistus ladanifer			Chuvieco, E., Yebra, M., Jurdao, S., Aguado, I., Salas, F. J., García, M., Nieto, H., De Santis, A., Cocero, D., Riaño, D., Martínez, S., Zapico, E., Recondo, C., Martínez-Vega, J., Martín, M.P., Riva, J., Pérez, F. y Rodríguez-Silva, F. (2011): Field Fuel Moisture Measurements on Spanish study sites. Department of Geography, University of Alcalá, Spain. Version 1. Available online at: http://www…
C2_10_49	Chuvieco	AraIBE13	Aragon	Spain	41.2541	-1.21567		2002-04-24	2002	11	Tree cover, needleleaved, evergreen, closed to open (>15%)	84.1929	1	0.0473399	0.070689	0.076651	0.110125	Rosmarinus officinalis			Chuvieco, E., Yebra, M., Jurdao, S., Aguado, I., Salas, F. J., García, M., Nieto, H., De Santis, A., Cocero, D., Riaño, D., Martínez, S., Zapico, E., Recondo, C., Martínez-Vega, J., Martín, M.P., Riva, J., Pérez, F. y Rodríguez-Silva, F. (2011): Field Fuel Moisture Measurements on Spanish study sites. Department of Geography, University of Alcalá, Spain. Version 1. Available online at: http://www…
C2_10_50	Chuvieco	AraIBE13	Aragon	Spain	41.2541	-1.21567		2002-04-24	2002	11	Tree cover, needleleaved, evergreen, closed to open (>15%)	65.8113	1	0.0473399	0.070689	0.076651	0.110125	Quercus ilex			Chuvieco, E., Yebra, M., Jurdao, S., Aguado, I., Salas, F. J., García, M., Nieto, H., De Santis, A., Cocero, D., Riaño, D., Martínez, S., Zapico, E., Recondo, C., Martínez-Vega, J., Martín, M.P., Riva, J., Pérez, F. y Rodríguez-Silva, F. (2011): Field Fuel Moisture Measurements on Spanish study sites. Department of Geography, University of Alcalá, Spain. Version 1. Available online at: http://www…
C2_10_51	Chuvieco	AraIBE13	Aragon	Spain	41.2541	-1.21567		2002-04-24	2002	11	Tree cover, needleleaved, evergreen, closed to open (>15%)	203.456	1	0.0473399	0.070689	0.076651	0.110125	Quercus faginea			Chuvieco, E., Yebra, M., Jurdao, S., Aguado, I., Salas, F. J., García, M., Nieto, H., De Santis, A., Cocero, D., Riaño, D., Martínez, S., Zapico, E., Recondo, C., Martínez-Vega, J., Martín, M.P., Riva, J., Pérez, F. y Rodríguez-Silva, F. (2011): Field Fuel Moisture Measurements on Spanish study sites. Department of Geography, University of Alcalá, Spain. Version 1. Available online at: http://www…
C2_10_52	Chuvieco	AraIBE13	Aragon	Spain	41.2541	-1.21567		2002-05-26	2002	11	Tree cover, needleleaved, evergreen, closed to open (>15%)	124.215	1	0.0473399	0.070689	0.076651	0.110125	Cistus ladanifer			Chuvieco, E., Yebra, M., Jurdao, S., Aguado, I., Salas, F. J., García, M., Nieto, H., De Santis, A., Cocero, D., Riaño, D., Martínez, S., Zapico, E., Recondo, C., Martínez-Vega, J., Martín, M.P., Riva, J., Pérez, F. y Rodríguez-Silva, F. (2011): Field Fuel Moisture Measurements on Spanish study sites. Department of Geography, University of Alcalá, Spain. Version 1. Available online at: http://www…
C2_10_53	Chuvieco	AraIBE13	Aragon	Spain	41.2541	-1.21567		2002-05-26	2002	11	Tree cover, needleleaved, evergreen, closed to open (>15%)	119.636	1	0.0473399	0.070689	0.076651	0.110125	Rosmarinus officinalis			Chuvieco, E., Yebra, M., Jurdao, S., Aguado, I., Salas, F. J., García, M., Nieto, H., De Santis, A., Cocero, D., Riaño, D., Martínez, S., Zapico, E., Recondo, C., Martínez-Vega, J., Martín, M.P., Riva, J., Pérez, F. y Rodríguez-Silva, F. (2011): Field Fuel Moisture Measurements on Spanish study sites. Department of Geography, University of Alcalá, Spain. Version 1. Available online at: http://www…
C2_10_54	Chuvieco	AraIBE13	Aragon	Spain	41.2541	-1.21567		2002-05-26	2002	11	Tree cover, needleleaved, evergreen, closed to open (>15%)	91.9693	1	0.0473399	0.070689	0.076651	0.110125	Quercus ilex			Chuvieco, E., Yebra, M., Jurdao, S., Aguado, I., Salas, F. J., García, M., Nieto, H., De Santis, A., Cocero, D., Riaño, D., Martínez, S., Zapico, E., Recondo, C., Martínez-Vega, J., Martín, M.P., Riva, J., Pérez, F. y Rodríguez-Silva, F. (2011): Field Fuel Moisture Measurements on Spanish study sites. Department of Geography, University of Alcalá, Spain. Version 1. Available online at: http://www…
C2_10_55	Chuvieco	AraIBE13	Aragon	Spain	41.2541	-1.21567		2002-05-26	2002	11	Tree cover, needleleaved, evergreen, closed to open (>15%)	127.737	1	0.0473399	0.070689	0.076651	0.110125	Quercus faginea			Chuvieco, E., Yebra, M., Jurdao, S., Aguado, I., Salas, F. J., García, M., Nieto, H., De Santis, A., Cocero, D., Riaño, D., Martínez, S., Zapico, E., Recondo, C., Martínez-Vega, J., Martín, M.P., Riva, J., Pérez, F. y Rodríguez-Silva, F. (2011): Field Fuel Moisture Measurements on Spanish study sites. Department of Geography, University of Alcalá, Spain. Version 1. Available online at: http://www…
C2_10_56	Chuvieco	AraIBE13	Aragon	Spain	41.2541	-1.21567		2002-06-11	2002	11	Tree cover, needleleaved, evergreen, closed to open (>15%)	112.451	1	0.0473399	0.070689	0.076651	0.110125	Cistus ladanifer			Chuvieco, E., Yebra, M., Jurdao, S., Aguado, I., Salas, F. J., García, M., Nieto, H., De Santis, A., Cocero, D., Riaño, D., Martínez, S., Zapico, E., Recondo, C., Martínez-Vega, J., Martín, M.P., Riva, J., Pérez, F. y Rodríguez-Silva, F. (2011): Field Fuel Moisture Measurements on Spanish study sites. Department of Geography, University of Alcalá, Spain. Version 1. Available online at: http://www…
C2_10_57	Chuvieco	AraIBE13	Aragon	Spain	41.2541	-1.21567		2002-06-11	2002	11	Tree cover, needleleaved, evergreen, closed to open (>15%)	126.945	1	0.0473399	0.070689	0.076651	0.110125	Rosmarinus officinalis			Chuvieco, E., Yebra, M., Jurdao, S., Aguado, I., Salas, F. J., García, M., Nieto, H., De Santis, A., Cocero, D., Riaño, D., Martínez, S., Zapico, E., Recondo, C., Martínez-Vega, J., Martín, M.P., Riva, J., Pérez, F. y Rodríguez-Silva, F. (2011): Field Fuel Moisture Measurements on Spanish study sites. Department of Geography, University of Alcalá, Spain. Version 1. Available online at: http://www…
C2_10_58	Chuvieco	AraIBE13	Aragon	Spain	41.2541	-1.21567		2002-06-11	2002	11	Tree cover, needleleaved, evergreen, closed to open (>15%)	95.8012	1	0.0473399	0.070689	0.076651	0.110125	Quercus ilex			Chuvieco, E., Yebra, M., Jurdao, S., Aguado, I., Salas, F. J., García, M., Nieto, H., De Santis, A., Cocero, D., Riaño, D., Martínez, S., Zapico, E., Recondo, C., Martínez-Vega, J., Martín, M.P., Riva, J., Pérez, F. y Rodríguez-Silva, F. (2011): Field Fuel Moisture Measurements on Spanish study sites. Department of Geography, University of Alcalá, Spain. Version 1. Available online at: http://www…
C2_10_59	Chuvieco	AraIBE13	Aragon	Spain	41.2541	-1.21567		2002-06-11	2002	11	Tree cover, needleleaved, evergreen, closed to open (>15%)	113.887	1	0.0473399	0.070689	0.076651	0.110125	Quercus faginea			Chuvieco, E., Yebra, M., Jurdao, S., Aguado, I., Salas, F. J., García, M., Nieto, H., De Santis, A., Cocero, D., Riaño, D., Martínez, S., Zapico, E., Recondo, C., Martínez-Vega, J., Martín, M.P., Riva, J., Pérez, F. y Rodríguez-Silva, F. (2011): Field Fuel Moisture Measurements on Spanish study sites. Department of Geography, University of Alcalá, Spain. Version 1. Available online at: http://www…
C2_10_60	Chuvieco	AraIBE13	Aragon	Spain	41.2541	-1.21567		2002-06-27	2002	11	Tree cover, needleleaved, evergreen, closed to open (>15%)	124.264	1	0.0473399	0.070689	0.076651	0.110125	Cistus ladanifer			Chuvieco, E., Yebra, M., Jurdao, S., Aguado, I., Salas, F. J., García, M., Nieto, H., De Santis, A., Cocero, D., Riaño, D., Martínez, S., Zapico, E., Recondo, C., Martínez-Vega, J., Martín, M.P., Riva, J., Pérez, F. y Rodríguez-Silva, F. (2011): Field Fuel Moisture Measurements on Spanish study sites. Department of Geography, University of Alcalá, Spain. Version 1. Available online at: http://www…
C2_10_61	Chuvieco	AraIBE13	Aragon	Spain	41.2541	-1.21567		2002-06-27	2002	11	Tree cover, needleleaved, evergreen, closed to open (>15%)	107.433	1	0.0473399	0.070689	0.076651	0.110125	Rosmarinus officinalis			Chuvieco, E., Yebra, M., Jurdao, S., Aguado, I., Salas, F. J., García, M., Nieto, H., De Santis, A., Cocero, D., Riaño, D., Martínez, S., Zapico, E., Recondo, C., Martínez-Vega, J., Martín, M.P., Riva, J., Pérez, F. y Rodríguez-Silva, F. (2011): Field Fuel Moisture Measurements on Spanish study sites. Department of Geography, University of Alcalá, Spain. Version 1. Available online at: http://www…
C2_10_62	Chuvieco	AraIBE13	Aragon	Spain	41.2541	-1.21567		2002-06-27	2002	11	Tree cover, needleleaved, evergreen, closed to open (>15%)	81.7756	1	0.0473399	0.070689	0.076651	0.110125	Quercus ilex			Chuvieco, E., Yebra, M., Jurdao, S., Aguado, I., Salas, F. J., García, M., Nieto, H., De Santis, A., Cocero, D., Riaño, D., Martínez, S., Zapico, E., Recondo, C., Martínez-Vega, J., Martín, M.P., Riva, J., Pérez, F. y Rodríguez-Silva, F. (2011): Field Fuel Moisture Measurements on Spanish study sites. Department of Geography, University of Alcalá, Spain. Version 1. Available online at: http://www…
C2_10_63	Chuvieco	AraIBE13	Aragon	Spain	41.2541	-1.21567		2002-06-27	2002	11	Tree cover, needleleaved, evergreen, closed to open (>15%)	70.9835	1	0.0473399	0.070689	0.076651	0.110125	Quercus faginea			Chuvieco, E., Yebra, M., Jurdao, S., Aguado, I., Salas, F. J., García, M., Nieto, H., De Santis, A., Cocero, D., Riaño, D., Martínez, S., Zapico, E., Recondo, C., Martínez-Vega, J., Martín, M.P., Riva, J., Pérez, F. y Rodríguez-Silva, F. (2011): Field Fuel Moisture Measurements on Spanish study sites. Department of Geography, University of Alcalá, Spain. Version 1. Available online at: http://www…
C2_10_64	Chuvieco	AraIBE13	Aragon	Spain	41.2541	-1.21567		2002-07-13	2002	11	Tree cover, needleleaved, evergreen, closed to open (>15%)	134.421	1	0.0473399	0.070689	0.076651	0.110125	Cistus ladanifer			Chuvieco, E., Yebra, M., Jurdao, S., Aguado, I., Salas, F. J., García, M., Nieto, H., De Santis, A., Cocero, D., Riaño, D., Martínez, S., Zapico, E., Recondo, C., Martínez-Vega, J., Martín, M.P., Riva, J., Pérez, F. y Rodríguez-Silva, F. (2011): Field Fuel Moisture Measurements on Spanish study sites. Department of Geography, University of Alcalá, Spain. Version 1. Available online at: http://www…
C2_10_65	Chuvieco	AraIBE13	Aragon	Spain	41.2541	-1.21567		2002-07-13	2002	11	Tree cover, needleleaved, evergreen, closed to open (>15%)	111.283	1	0.0473399	0.070689	0.076651	0.110125	Rosmarinus officinalis			Chuvieco, E., Yebra, M., Jurdao, S., Aguado, I., Salas, F. J., García, M., Nieto, H., De Santis, A., Cocero, D., Riaño, D., Martínez, S., Zapico, E., Recondo, C., Martínez-Vega, J., Martín, M.P., Riva, J., Pérez, F. y Rodríguez-Silva, F. (2011): Field Fuel Moisture Measurements on Spanish study sites. Department of Geography, University of Alcalá, Spain. Version 1. Available online at: http://www…
C2_10_66	Chuvieco	AraIBE13	Aragon	Spain	41.2541	-1.21567		2002-07-13	2002	11	Tree cover, needleleaved, evergreen, closed to open (>15%)	86.0312	1	0.0473399	0.070689	0.076651	0.110125	Quercus ilex			Chuvieco, E., Yebra, M., Jurdao, S., Aguado, I., Salas, F. J., García, M., Nieto, H., De Santis, A., Cocero, D., Riaño, D., Martínez, S., Zapico, E., Recondo, C., Martínez-Vega, J., Martín, M.P., Riva, J., Pérez, F. y Rodríguez-Silva, F. (2011): Field Fuel Moisture Measurements on Spanish study sites. Department of Geography, University of Alcalá, Spain. Version 1. Available online at: http://www…
C2_10_67	Chuvieco	AraIBE13	Aragon	Spain	41.2541	-1.21567		2002-07-13	2002	11	Tree cover, needleleaved, evergreen, closed to open (>15%)	122.531	1	0.0473399	0.070689	0.076651	0.110125	Quercus faginea			Chuvieco, E., Yebra, M., Jurdao, S., Aguado, I., Salas, F. J., García, M., Nieto, H., De Santis, A., Cocero, D., Riaño, D., Martínez, S., Zapico, E., Recondo, C., Martínez-Vega, J., Martín, M.P., Riva, J., Pérez, F. y Rodríguez-Silva, F. (2011): Field Fuel Moisture Measurements on Spanish study sites. Department of Geography, University of Alcalá, Spain. Version 1. Available online at: http://www…
C2_10_68	Chuvieco	AraIBE13	Aragon	Spain	41.2541	-1.21567		2002-07-29	2002	11	Tree cover, needleleaved, evergreen, closed to open (>15%)	102.317	1	0.0473399	0.070689	0.076651	0.110125	Cistus ladanifer			Chuvieco, E., Yebra, M., Jurdao, S., Aguado, I., Salas, F. J., García, M., Nieto, H., De Santis, A., Cocero, D., Riaño, D., Martínez, S., Zapico, E., Recondo, C., Martínez-Vega, J., Martín, M.P., Riva, J., Pérez, F. y Rodríguez-Silva, F. (2011): Field Fuel Moisture Measurements on Spanish study sites. Department of Geography, University of Alcalá, Spain. Version 1. Available online at: http://www…
C2_10_69	Chuvieco	AraIBE13	Aragon	Spain	41.2541	-1.21567		2002-07-29	2002	11	Tree cover, needleleaved, evergreen, closed to open (>15%)	91.2012	1	0.0473399	0.070689	0.076651	0.110125	Rosmarinus officinalis			Chuvieco, E., Yebra, M., Jurdao, S., Aguado, I., Salas, F. J., García, M., Nieto, H., De Santis, A., Cocero, D., Riaño, D., Martínez, S., Zapico, E., Recondo, C., Martínez-Vega, J., Martín, M.P., Riva, J., Pérez, F. y Rodríguez-Silva, F. (2011): Field Fuel Moisture Measurements on Spanish study sites. Department of Geography, University of Alcalá, Spain. Version 1. Available online at: http://www…
C2_10_70	Chuvieco	AraIBE13	Aragon	Spain	41.2541	-1.21567		2002-07-29	2002	11	Tree cover, needleleaved, evergreen, closed to open (>15%)	75.701	1	0.0473399	0.070689	0.076651	0.110125	Quercus ilex			Chuvieco, E., Yebra, M., Jurdao, S., Aguado, I., Salas, F. J., García, M., Nieto, H., De Santis, A., Cocero, D., Riaño, D., Martínez, S., Zapico, E., Recondo, C., Martínez-Vega, J., Martín, M.P., Riva, J., Pérez, F. y Rodríguez-Silva, F. (2011): Field Fuel Moisture Measurements on Spanish study sites. Department of Geography, University of Alcalá, Spain. Version 1. Available online at: http://www…
C2_10_71	Chuvieco	AraIBE13	Aragon	Spain	41.2541	-1.21567		2002-07-29	2002	11	Tree cover, needleleaved, evergreen, closed to open (>15%)	101.207	1	0.0473399	0.070689	0.076651	0.110125	Quercus faginea			Chuvieco, E., Yebra, M., Jurdao, S., Aguado, I., Salas, F. J., García, M., Nieto, H., De Santis, A., Cocero, D., Riaño, D., Martínez, S., Zapico, E., Recondo, C., Martínez-Vega, J., Martín, M.P., Riva, J., Pérez, F. y Rodríguez-Silva, F. (2011): Field Fuel Moisture Measurements on Spanish study sites. Department of Geography, University of Alcalá, Spain. Version 1. Available online at: http://www…
C2_10_72	Chuvieco	AraIBE13	Aragon	Spain	41.2541	-1.21567		2002-08-30	2002	11	Tree cover, needleleaved, evergreen, closed to open (>15%)	117.131	1	0.0473399	0.070689	0.076651	0.110125	Cistus ladanifer			Chuvieco, E., Yebra, M., Jurdao, S., Aguado, I., Salas, F. J., García, M., Nieto, H., De Santis, A., Cocero, D., Riaño, D., Martínez, S., Zapico, E., Recondo, C., Martínez-Vega, J., Martín, M.P., Riva, J., Pérez, F. y Rodríguez-Silva, F. (2011): Field Fuel Moisture Measurements on Spanish study sites. Department of Geography, University of Alcalá, Spain. Version 1. Available online at: http://www…
C2_10_73	Chuvieco	AraIBE13	Aragon	Spain	41.2541	-1.21567		2002-08-30	2002	11	Tree cover, needleleaved, evergreen, closed to open (>15%)	94.9898	1	0.0473399	0.070689	0.076651	0.110125	Rosmarinus officinalis			Chuvieco, E., Yebra, M., Jurdao, S., Aguado, I., Salas, F. J., García, M., Nieto, H., De Santis, A., Cocero, D., Riaño, D., Martínez, S., Zapico, E., Recondo, C., Martínez-Vega, J., Martín, M.P., Riva, J., Pérez, F. y Rodríguez-Silva, F. (2011): Field Fuel Moisture Measurements on Spanish study sites. Department of Geography, University of Alcalá, Spain. Version 1. Available online at: http://www…
C2_10_74	Chuvieco	AraIBE13	Aragon	Spain	41.2541	-1.21567		2002-08-30	2002	11	Tree cover, needleleaved, evergreen, closed to open (>15%)	81.6337	1	0.0473399	0.070689	0.076651	0.110125	Quercus ilex			Chuvieco, E., Yebra, M., Jurdao, S., Aguado, I., Salas, F. J., García, M., Nieto, H., De Santis, A., Cocero, D., Riaño, D., Martínez, S., Zapico, E., Recondo, C., Martínez-Vega, J., Martín, M.P., Riva, J., Pérez, F. y Rodríguez-Silva, F. (2011): Field Fuel Moisture Measurements on Spanish study sites. Department of Geography, University of Alcalá, Spain. Version 1. Available online at: http://www…
C2_10_75	Chuvieco	AraIBE13	Aragon	Spain	41.2541	-1.21567		2002-08-30	2002	11	Tree cover, needleleaved, evergreen, closed to open (>15%)	93.411	1	0.0473399	0.070689	0.076651	0.110125	Quercus faginea			Chuvieco, E., Yebra, M., Jurdao, S., Aguado, I., Salas, F. J., García, M., Nieto, H., De Santis, A., Cocero, D., Riaño, D., Martínez, S., Zapico, E., Recondo, C., Martínez-Vega, J., Martín, M.P., Riva, J., Pérez, F. y Rodríguez-Silva, F. (2011): Field Fuel Moisture Measurements on Spanish study sites. Department of Geography, University of Alcalá, Spain. Version 1. Available online at: http://www…
C2_10_76	Chuvieco	AraIBE13	Aragon	Spain	41.2541	-1.21567		2002-09-15	2002	11	Tree cover, needleleaved, evergreen, closed to open (>15%)	88.0774	1	0.0473399	0.070689	0.076651	0.110125	Cistus ladanifer			Chuvieco, E., Yebra, M., Jurdao, S., Aguado, I., Salas, F. J., García, M., Nieto, H., De Santis, A., Cocero, D., Riaño, D., Martínez, S., Zapico, E., Recondo, C., Martínez-Vega, J., Martín, M.P., Riva, J., Pérez, F. y Rodríguez-Silva, F. (2011): Field Fuel Moisture Measurements on Spanish study sites. Department of Geography, University of Alcalá, Spain. Version 1. Available online at: http://www…
C2_10_77	Chuvieco	AraIBE13	Aragon	Spain	41.2541	-1.21567		2002-09-15	2002	11	Tree cover, needleleaved, evergreen, closed to open (>15%)	66.8811	1	0.0473399	0.070689	0.076651	0.110125	Rosmarinus officinalis			Chuvieco, E., Yebra, M., Jurdao, S., Aguado, I., Salas, F. J., García, M., Nieto, H., De Santis, A., Cocero, D., Riaño, D., Martínez, S., Zapico, E., Recondo, C., Martínez-Vega, J., Martín, M.P., Riva, J., Pérez, F. y Rodríguez-Silva, F. (2011): Field Fuel Moisture Measurements on Spanish study sites. Department of Geography, University of Alcalá, Spain. Version 1. Available online at: http://www…
C2_10_78	Chuvieco	AraIBE13	Aragon	Spain	41.2541	-1.21567		2002-09-15	2002	11	Tree cover, needleleaved, evergreen, closed to open (>15%)	76.4151	1	0.0473399	0.070689	0.076651	0.110125	Quercus ilex			Chuvieco, E., Yebra, M., Jurdao, S., Aguado, I., Salas, F. J., García, M., Nieto, H., De Santis, A., Cocero, D., Riaño, D., Martínez, S., Zapico, E., Recondo, C., Martínez-Vega, J., Martín, M.P., Riva, J., Pérez, F. y Rodríguez-Silva, F. (2011): Field Fuel Moisture Measurements on Spanish study sites. Department of Geography, University of Alcalá, Spain. Version 1. Available online at: http://www…
C2_10_79	Chuvieco	AraIBE13	Aragon	Spain	41.2541	-1.21567		2002-09-15	2002	11	Tree cover, needleleaved, evergreen, closed to open (>15%)	91.1187	1	0.0473399	0.070689	0.076651	0.110125	Quercus faginea			Chuvieco, E., Yebra, M., Jurdao, S., Aguado, I., Salas, F. J., García, M., Nieto, H., De Santis, A., Cocero, D., Riaño, D., Martínez, S., Zapico, E., Recondo, C., Martínez-Vega, J., Martín, M.P., Riva, J., Pérez, F. y Rodríguez-Silva, F. (2011): Field Fuel Moisture Measurements on Spanish study sites. Department of Geography, University of Alcalá, Spain. Version 1. Available online at: http://www…
C2_11_1	Chuvieco	AraIBE14	Aragon	Spain	41.1995	-1.18132		2001-04-12	2001	11	Mosaic tree and shrub (>50%) / herbaceous cover (<50%)	81.0721	1	0.0436079	0.0592164	0.1001	0.117503	Thymus vulgaris			Chuvieco, E., Yebra, M., Jurdao, S., Aguado, I., Salas, F. J., García, M., Nieto, H., De Santis, A., Cocero, D., Riaño, D., Martínez, S., Zapico, E., Recondo, C., Martínez-Vega, J., Martín, M.P., Riva, J., Pérez, F. y Rodríguez-Silva, F. (2011): Field Fuel Moisture Measurements on Spanish study sites. Department of Geography, University of Alcalá, Spain. Version 1. Available online at: http://www…
C2_11_2	Chuvieco	AraIBE14	Aragon	Spain	41.1995	-1.18132		2001-04-12	2001	11	Mosaic tree and shrub (>50%) / herbaceous cover (<50%)	176.02	1	0.0436079	0.0592164	0.1001	0.117503	Lavandula angustifolia			Chuvieco, E., Yebra, M., Jurdao, S., Aguado, I., Salas, F. J., García, M., Nieto, H., De Santis, A., Cocero, D., Riaño, D., Martínez, S., Zapico, E., Recondo, C., Martínez-Vega, J., Martín, M.P., Riva, J., Pérez, F. y Rodríguez-Silva, F. (2011): Field Fuel Moisture Measurements on Spanish study sites. Department of Geography, University of Alcalá, Spain. Version 1. Available online at: http://www…
C2_11_3	Chuvieco	AraIBE14	Aragon	Spain	41.1995	-1.18132		2001-04-12	2001	11	Mosaic tree and shrub (>50%) / herbaceous cover (<50%)	110.25	1	0.0436079	0.0592164	0.1001	0.117503	Retama sphaerocarpa			Chuvieco, E., Yebra, M., Jurdao, S., Aguado, I., Salas, F. J., García, M., Nieto, H., De Santis, A., Cocero, D., Riaño, D., Martínez, S., Zapico, E., Recondo, C., Martínez-Vega, J., Martín, M.P., Riva, J., Pérez, F. y Rodríguez-Silva, F. (2011): Field Fuel Moisture Measurements on Spanish study sites. Department of Geography, University of Alcalá, Spain. Version 1. Available online at: http://www…
C2_11_4	Chuvieco	AraIBE14	Aragon	Spain	41.1995	-1.18132		2001-04-12	2001	11	Mosaic tree and shrub (>50%) / herbaceous cover (<50%)	93.45	1	0.0436079	0.0592164	0.1001	0.117503	Ulex parviflorus			Chuvieco, E., Yebra, M., Jurdao, S., Aguado, I., Salas, F. J., García, M., Nieto, H., De Santis, A., Cocero, D., Riaño, D., Martínez, S., Zapico, E., Recondo, C., Martínez-Vega, J., Martín, M.P., Riva, J., Pérez, F. y Rodríguez-Silva, F. (2011): Field Fuel Moisture Measurements on Spanish study sites. Department of Geography, University of Alcalá, Spain. Version 1. Available online at: http://www…
C2_11_5	Chuvieco	AraIBE14	Aragon	Spain	41.1995	-1.18132		2001-04-29	2001	11	Mosaic tree and shrub (>50%) / herbaceous cover (<50%)	85.0381	1	0.0436079	0.0592164	0.1001	0.117503	Thymus vulgaris			Chuvieco, E., Yebra, M., Jurdao, S., Aguado, I., Salas, F. J., García, M., Nieto, H., De Santis, A., Cocero, D., Riaño, D., Martínez, S., Zapico, E., Recondo, C., Martínez-Vega, J., Martín, M.P., Riva, J., Pérez, F. y Rodríguez-Silva, F. (2011): Field Fuel Moisture Measurements on Spanish study sites. Department of Geography, University of Alcalá, Spain. Version 1. Available online at: http://www…
C2_11_6	Chuvieco	AraIBE14	Aragon	Spain	41.1995	-1.18132		2001-04-29	2001	11	Mosaic tree and shrub (>50%) / herbaceous cover (<50%)	139.513	1	0.0436079	0.0592164	0.1001	0.117503	Lavandula angustifolia			Chuvieco, E., Yebra, M., Jurdao, S., Aguado, I., Salas, F. J., García, M., Nieto, H., De Santis, A., Cocero, D., Riaño, D., Martínez, S., Zapico, E., Recondo, C., Martínez-Vega, J., Martín, M.P., Riva, J., Pérez, F. y Rodríguez-Silva, F. (2011): Field Fuel Moisture Measurements on Spanish study sites. Department of Geography, University of Alcalá, Spain. Version 1. Available online at: http://www…
C2_11_7	Chuvieco	AraIBE14	Aragon	Spain	41.1995	-1.18132		2001-04-29	2001	11	Mosaic tree and shrub (>50%) / herbaceous cover (<50%)	110.661	1	0.0436079	0.0592164	0.1001	0.117503	Retama sphaerocarpa			Chuvieco, E., Yebra, M., Jurdao, S., Aguado, I., Salas, F. J., García, M., Nieto, H., De Santis, A., Cocero, D., Riaño, D., Martínez, S., Zapico, E., Recondo, C., Martínez-Vega, J., Martín, M.P., Riva, J., Pérez, F. y Rodríguez-Silva, F. (2011): Field Fuel Moisture Measurements on Spanish study sites. Department of Geography, University of Alcalá, Spain. Version 1. Available online at: http://www…
C2_11_8	Chuvieco	AraIBE14	Aragon	Spain	41.1995	-1.18132		2001-04-29	2001	11	Mosaic tree and shrub (>50%) / herbaceous cover (<50%)	82.3632	1	0.0436079	0.0592164	0.1001	0.117503	Ulex parviflorus			Chuvieco, E., Yebra, M., Jurdao, S., Aguado, I., Salas, F. J., García, M., Nieto, H., De Santis, A., Cocero, D., Riaño, D., Martínez, S., Zapico, E., Recondo, C., Martínez-Vega, J., Martín, M.P., Riva, J., Pérez, F. y Rodríguez-Silva, F. (2011): Field Fuel Moisture Measurements on Spanish study sites. Department of Geography, University of Alcalá, Spain. Version 1. Available online at: http://www…
C2_11_9	Chuvieco	AraIBE14	Aragon	Spain	41.1995	-1.18132		2001-05-15	2001	11	Mosaic tree and shrub (>50%) / herbaceous cover (<50%)	90.0618	1	0.0436079	0.0592164	0.1001	0.117503	Thymus vulgaris			Chuvieco, E., Yebra, M., Jurdao, S., Aguado, I., Salas, F. J., García, M., Nieto, H., De Santis, A., Cocero, D., Riaño, D., Martínez, S., Zapico, E., Recondo, C., Martínez-Vega, J., Martín, M.P., Riva, J., Pérez, F. y Rodríguez-Silva, F. (2011): Field Fuel Moisture Measurements on Spanish study sites. Department of Geography, University of Alcalá, Spain. Version 1. Available online at: http://www…
C2_11_10	Chuvieco	AraIBE14	Aragon	Spain	41.1995	-1.18132		2001-05-15	2001	11	Mosaic tree and shrub (>50%) / herbaceous cover (<50%)	160.69	1	0.0436079	0.0592164	0.1001	0.117503	Lavandula angustifolia			Chuvieco, E., Yebra, M., Jurdao, S., Aguado, I., Salas, F. J., García, M., Nieto, H., De Santis, A., Cocero, D., Riaño, D., Martínez, S., Zapico, E., Recondo, C., Martínez-Vega, J., Martín, M.P., Riva, J., Pérez, F. y Rodríguez-Silva, F. (2011): Field Fuel Moisture Measurements on Spanish study sites. Department of Geography, University of Alcalá, Spain. Version 1. Available online at: http://www…
C2_11_11	Chuvieco	AraIBE14	Aragon	Spain	41.1995	-1.18132		2001-05-15	2001	11	Mosaic tree and shrub (>50%) / herbaceous cover (<50%)	116.548	1	0.0436079	0.0592164	0.1001	0.117503	Retama sphaerocarpa			Chuvieco, E., Yebra, M., Jurdao, S., Aguado, I., Salas, F. J., García, M., Nieto, H., De Santis, A., Cocero, D., Riaño, D., Martínez, S., Zapico, E., Recondo, C., Martínez-Vega, J., Martín, M.P., Riva, J., Pérez, F. y Rodríguez-Silva, F. (2011): Field Fuel Moisture Measurements on Spanish study sites. Department of Geography, University of Alcalá, Spain. Version 1. Available online at: http://www…
C2_11_12	Chuvieco	AraIBE14	Aragon	Spain	41.1995	-1.18132		2001-05-15	2001	11	Mosaic tree and shrub (>50%) / herbaceous cover (<50%)	89.0449	1	0.0436079	0.0592164	0.1001	0.117503	Ulex parviflorus			Chuvieco, E., Yebra, M., Jurdao, S., Aguado, I., Salas, F. J., García, M., Nieto, H., De Santis, A., Cocero, D., Riaño, D., Martínez, S., Zapico, E., Recondo, C., Martínez-Vega, J., Martín, M.P., Riva, J., Pérez, F. y Rodríguez-Silva, F. (2011): Field Fuel Moisture Measurements on Spanish study sites. Department of Geography, University of Alcalá, Spain. Version 1. Available online at: http://www…
C2_11_13	Chuvieco	AraIBE14	Aragon	Spain	41.1995	-1.18132		2001-05-31	2001	11	Mosaic tree and shrub (>50%) / herbaceous cover (<50%)	90.8165	1	0.0436079	0.0592164	0.1001	0.117503	Thymus vulgaris			Chuvieco, E., Yebra, M., Jurdao, S., Aguado, I., Salas, F. J., García, M., Nieto, H., De Santis, A., Cocero, D., Riaño, D., Martínez, S., Zapico, E., Recondo, C., Martínez-Vega, J., Martín, M.P., Riva, J., Pérez, F. y Rodríguez-Silva, F. (2011): Field Fuel Moisture Measurements on Spanish study sites. Department of Geography, University of Alcalá, Spain. Version 1. Available online at: http://www…
C2_11_14	Chuvieco	AraIBE14	Aragon	Spain	41.1995	-1.18132		2001-05-31	2001	11	Mosaic tree and shrub (>50%) / herbaceous cover (<50%)	143.343	1	0.0436079	0.0592164	0.1001	0.117503	Lavandula angustifolia			Chuvieco, E., Yebra, M., Jurdao, S., Aguado, I., Salas, F. J., García, M., Nieto, H., De Santis, A., Cocero, D., Riaño, D., Martínez, S., Zapico, E., Recondo, C., Martínez-Vega, J., Martín, M.P., Riva, J., Pérez, F. y Rodríguez-Silva, F. (2011): Field Fuel Moisture Measurements on Spanish study sites. Department of Geography, University of Alcalá, Spain. Version 1. Available online at: http://www…
C2_11_15	Chuvieco	AraIBE14	Aragon	Spain	41.1995	-1.18132		2001-05-31	2001	11	Mosaic tree and shrub (>50%) / herbaceous cover (<50%)	121.726	1	0.0436079	0.0592164	0.1001	0.117503	Retama sphaerocarpa			Chuvieco, E., Yebra, M., Jurdao, S., Aguado, I., Salas, F. J., García, M., Nieto, H., De Santis, A., Cocero, D., Riaño, D., Martínez, S., Zapico, E., Recondo, C., Martínez-Vega, J., Martín, M.P., Riva, J., Pérez, F. y Rodríguez-Silva, F. (2011): Field Fuel Moisture Measurements on Spanish study sites. Department of Geography, University of Alcalá, Spain. Version 1. Available online at: http://www…
C2_11_16	Chuvieco	AraIBE14	Aragon	Spain	41.1995	-1.18132		2001-05-31	2001	11	Mosaic tree and shrub (>50%) / herbaceous cover (<50%)	105.953	1	0.0436079	0.0592164	0.1001	0.117503	Ulex parviflorus			Chuvieco, E., Yebra, M., Jurdao, S., Aguado, I., Salas, F. J., García, M., Nieto, H., De Santis, A., Cocero, D., Riaño, D., Martínez, S., Zapico, E., Recondo, C., Martínez-Vega, J., Martín, M.P., Riva, J., Pérez, F. y Rodríguez-Silva, F. (2011): Field Fuel Moisture Measurements on Spanish study sites. Department of Geography, University of Alcalá, Spain. Version 1. Available online at: http://www…
C2_11_17	Chuvieco	AraIBE14	Aragon	Spain	41.1995	-1.18132		2001-06-16	2001	11	Mosaic tree and shrub (>50%) / herbaceous cover (<50%)	63.4635	1	0.0436079	0.0592164	0.1001	0.117503	Thymus vulgaris			Chuvieco, E., Yebra, M., Jurdao, S., Aguado, I., Salas, F. J., García, M., Nieto, H., De Santis, A., Cocero, D., Riaño, D., Martínez, S., Zapico, E., Recondo, C., Martínez-Vega, J., Martín, M.P., Riva, J., Pérez, F. y Rodríguez-Silva, F. (2011): Field Fuel Moisture Measurements on Spanish study sites. Department of Geography, University of Alcalá, Spain. Version 1. Available online at: http://www…
C2_11_18	Chuvieco	AraIBE14	Aragon	Spain	41.1995	-1.18132		2001-06-16	2001	11	Mosaic tree and shrub (>50%) / herbaceous cover (<50%)	112.111	1	0.0436079	0.0592164	0.1001	0.117503	Lavandula angustifolia			Chuvieco, E., Yebra, M., Jurdao, S., Aguado, I., Salas, F. J., García, M., Nieto, H., De Santis, A., Cocero, D., Riaño, D., Martínez, S., Zapico, E., Recondo, C., Martínez-Vega, J., Martín, M.P., Riva, J., Pérez, F. y Rodríguez-Silva, F. (2011): Field Fuel Moisture Measurements on Spanish study sites. Department of Geography, University of Alcalá, Spain. Version 1. Available online at: http://www…
C2_11_19	Chuvieco	AraIBE14	Aragon	Spain	41.1995	-1.18132		2001-06-16	2001	11	Mosaic tree and shrub (>50%) / herbaceous cover (<50%)	150.779	1	0.0436079	0.0592164	0.1001	0.117503	Retama sphaerocarpa			Chuvieco, E., Yebra, M., Jurdao, S., Aguado, I., Salas, F. J., García, M., Nieto, H., De Santis, A., Cocero, D., Riaño, D., Martínez, S., Zapico, E., Recondo, C., Martínez-Vega, J., Martín, M.P., Riva, J., Pérez, F. y Rodríguez-Silva, F. (2011): Field Fuel Moisture Measurements on Spanish study sites. Department of Geography, University of Alcalá, Spain. Version 1. Available online at: http://www…
C2_11_20	Chuvieco	AraIBE14	Aragon	Spain	41.1995	-1.18132		2001-06-16	2001	11	Mosaic tree and shrub (>50%) / herbaceous cover (<50%)	94.5824	1	0.0436079	0.0592164	0.1001	0.117503	Ulex parviflorus			Chuvieco, E., Yebra, M., Jurdao, S., Aguado, I., Salas, F. J., García, M., Nieto, H., De Santis, A., Cocero, D., Riaño, D., Martínez, S., Zapico, E., Recondo, C., Martínez-Vega, J., Martín, M.P., Riva, J., Pérez, F. y Rodríguez-Silva, F. (2011): Field Fuel Moisture Measurements on Spanish study sites. Department of Geography, University of Alcalá, Spain. Version 1. Available online at: http://www…
C2_11_21	Chuvieco	AraIBE14	Aragon	Spain	41.1995	-1.18132		2001-07-02	2001	11	Mosaic tree and shrub (>50%) / herbaceous cover (<50%)	30.9473	1	0.0436079	0.0592164	0.1001	0.117503	Thymus vulgaris			Chuvieco, E., Yebra, M., Jurdao, S., Aguado, I., Salas, F. J., García, M., Nieto, H., De Santis, A., Cocero, D., Riaño, D., Martínez, S., Zapico, E., Recondo, C., Martínez-Vega, J., Martín, M.P., Riva, J., Pérez, F. y Rodríguez-Silva, F. (2011): Field Fuel Moisture Measurements on Spanish study sites. Department of Geography, University of Alcalá, Spain. Version 1. Available online at: http://www…
C2_11_22	Chuvieco	AraIBE14	Aragon	Spain	41.1995	-1.18132		2001-07-02	2001	11	Mosaic tree and shrub (>50%) / herbaceous cover (<50%)	62.0254	1	0.0436079	0.0592164	0.1001	0.117503	Lavandula angustifolia			Chuvieco, E., Yebra, M., Jurdao, S., Aguado, I., Salas, F. J., García, M., Nieto, H., De Santis, A., Cocero, D., Riaño, D., Martínez, S., Zapico, E., Recondo, C., Martínez-Vega, J., Martín, M.P., Riva, J., Pérez, F. y Rodríguez-Silva, F. (2011): Field Fuel Moisture Measurements on Spanish study sites. Department of Geography, University of Alcalá, Spain. Version 1. Available online at: http://www…
C2_11_23	Chuvieco	AraIBE14	Aragon	Spain	41.1995	-1.18132		2001-07-02	2001	11	Mosaic tree and shrub (>50%) / herbaceous cover (<50%)	150.961	1	0.0436079	0.0592164	0.1001	0.117503	Retama sphaerocarpa			Chuvieco, E., Yebra, M., Jurdao, S., Aguado, I., Salas, F. J., García, M., Nieto, H., De Santis, A., Cocero, D., Riaño, D., Martínez, S., Zapico, E., Recondo, C., Martínez-Vega, J., Martín, M.P., Riva, J., Pérez, F. y Rodríguez-Silva, F. (2011): Field Fuel Moisture Measurements on Spanish study sites. Department of Geography, University of Alcalá, Spain. Version 1. Available online at: http://www…
C2_11_24	Chuvieco	AraIBE14	Aragon	Spain	41.1995	-1.18132		2001-07-02	2001	11	Mosaic tree and shrub (>50%) / herbaceous cover (<50%)	82.718	1	0.0436079	0.0592164	0.1001	0.117503	Ulex parviflorus			Chuvieco, E., Yebra, M., Jurdao, S., Aguado, I., Salas, F. J., García, M., Nieto, H., De Santis, A., Cocero, D., Riaño, D., Martínez, S., Zapico, E., Recondo, C., Martínez-Vega, J., Martín, M.P., Riva, J., Pérez, F. y Rodríguez-Silva, F. (2011): Field Fuel Moisture Measurements on Spanish study sites. Department of Geography, University of Alcalá, Spain. Version 1. Available online at: http://www…
C2_11_25	Chuvieco	AraIBE14	Aragon	Spain	41.1995	-1.18132		2001-07-18	2001	11	Mosaic tree and shrub (>50%) / herbaceous cover (<50%)	23.6458	1	0.0436079	0.0592164	0.1001	0.117503	Thymus vulgaris			Chuvieco, E., Yebra, M., Jurdao, S., Aguado, I., Salas, F. J., García, M., Nieto, H., De Santis, A., Cocero, D., Riaño, D., Martínez, S., Zapico, E., Recondo, C., Martínez-Vega, J., Martín, M.P., Riva, J., Pérez, F. y Rodríguez-Silva, F. (2011): Field Fuel Moisture Measurements on Spanish study sites. Department of Geography, University of Alcalá, Spain. Version 1. Available online at: http://www…
C2_11_26	Chuvieco	AraIBE14	Aragon	Spain	41.1995	-1.18132		2001-07-18	2001	11	Mosaic tree and shrub (>50%) / herbaceous cover (<50%)	48.641	1	0.0436079	0.0592164	0.1001	0.117503	Lavandula angustifolia			Chuvieco, E., Yebra, M., Jurdao, S., Aguado, I., Salas, F. J., García, M., Nieto, H., De Santis, A., Cocero, D., Riaño, D., Martínez, S., Zapico, E., Recondo, C., Martínez-Vega, J., Martín, M.P., Riva, J., Pérez, F. y Rodríguez-Silva, F. (2011): Field Fuel Moisture Measurements on Spanish study sites. Department of Geography, University of Alcalá, Spain. Version 1. Available online at: http://www…
C2_11_27	Chuvieco	AraIBE14	Aragon	Spain	41.1995	-1.18132		2001-07-18	2001	11	Mosaic tree and shrub (>50%) / herbaceous cover (<50%)	126.927	1	0.0436079	0.0592164	0.1001	0.117503	Retama sphaerocarpa			Chuvieco, E., Yebra, M., Jurdao, S., Aguado, I., Salas, F. J., García, M., Nieto, H., De Santis, A., Cocero, D., Riaño, D., Martínez, S., Zapico, E., Recondo, C., Martínez-Vega, J., Martín, M.P., Riva, J., Pérez, F. y Rodríguez-Silva, F. (2011): Field Fuel Moisture Measurements on Spanish study sites. Department of Geography, University of Alcalá, Spain. Version 1. Available online at: http://www…
C2_11_28	Chuvieco	AraIBE14	Aragon	Spain	41.1995	-1.18132		2001-07-18	2001	11	Mosaic tree and shrub (>50%) / herbaceous cover (<50%)	61.6745	1	0.0436079	0.0592164	0.1001	0.117503	Ulex parviflorus			Chuvieco, E., Yebra, M., Jurdao, S., Aguado, I., Salas, F. J., García, M., Nieto, H., De Santis, A., Cocero, D., Riaño, D., Martínez, S., Zapico, E., Recondo, C., Martínez-Vega, J., Martín, M.P., Riva, J., Pérez, F. y Rodríguez-Silva, F. (2011): Field Fuel Moisture Measurements on Spanish study sites. Department of Geography, University of Alcalá, Spain. Version 1. Available online at: http://www…
C2_11_29	Chuvieco	AraIBE14	Aragon	Spain	41.1995	-1.18132		2001-08-03	2001	11	Mosaic tree and shrub (>50%) / herbaceous cover (<50%)	24.4413	1	0.0436079	0.0592164	0.1001	0.117503	Thymus vulgaris			Chuvieco, E., Yebra, M., Jurdao, S., Aguado, I., Salas, F. J., García, M., Nieto, H., De Santis, A., Cocero, D., Riaño, D., Martínez, S., Zapico, E., Recondo, C., Martínez-Vega, J., Martín, M.P., Riva, J., Pérez, F. y Rodríguez-Silva, F. (2011): Field Fuel Moisture Measurements on Spanish study sites. Department of Geography, University of Alcalá, Spain. Version 1. Available online at: http://www…
C2_11_30	Chuvieco	AraIBE14	Aragon	Spain	41.1995	-1.18132		2001-08-03	2001	11	Mosaic tree and shrub (>50%) / herbaceous cover (<50%)	40.3138	1	0.0436079	0.0592164	0.1001	0.117503	Lavandula angustifolia			Chuvieco, E., Yebra, M., Jurdao, S., Aguado, I., Salas, F. J., García, M., Nieto, H., De Santis, A., Cocero, D., Riaño, D., Martínez, S., Zapico, E., Recondo, C., Martínez-Vega, J., Martín, M.P., Riva, J., Pérez, F. y Rodríguez-Silva, F. (2011): Field Fuel Moisture Measurements on Spanish study sites. Department of Geography, University of Alcalá, Spain. Version 1. Available online at: http://www…
C2_11_31	Chuvieco	AraIBE14	Aragon	Spain	41.1995	-1.18132		2001-08-03	2001	11	Mosaic tree and shrub (>50%) / herbaceous cover (<50%)	146.32	1	0.0436079	0.0592164	0.1001	0.117503	Retama sphaerocarpa			Chuvieco, E., Yebra, M., Jurdao, S., Aguado, I., Salas, F. J., García, M., Nieto, H., De Santis, A., Cocero, D., Riaño, D., Martínez, S., Zapico, E., Recondo, C., Martínez-Vega, J., Martín, M.P., Riva, J., Pérez, F. y Rodríguez-Silva, F. (2011): Field Fuel Moisture Measurements on Spanish study sites. Department of Geography, University of Alcalá, Spain. Version 1. Available online at: http://www…
C2_11_32	Chuvieco	AraIBE14	Aragon	Spain	41.1995	-1.18132		2001-08-03	2001	11	Mosaic tree and shrub (>50%) / herbaceous cover (<50%)	55.0583	1	0.0436079	0.0592164	0.1001	0.117503	Ulex parviflorus			Chuvieco, E., Yebra, M., Jurdao, S., Aguado, I., Salas, F. J., García, M., Nieto, H., De Santis, A., Cocero, D., Riaño, D., Martínez, S., Zapico, E., Recondo, C., Martínez-Vega, J., Martín, M.P., Riva, J., Pérez, F. y Rodríguez-Silva, F. (2011): Field Fuel Moisture Measurements on Spanish study sites. Department of Geography, University of Alcalá, Spain. Version 1. Available online at: http://www…
C2_11_33	Chuvieco	AraIBE14	Aragon	Spain	41.1995	-1.18132		2001-08-19	2001	11	Mosaic tree and shrub (>50%) / herbaceous cover (<50%)	34.006	1	0.0436079	0.0592164	0.1001	0.117503	Thymus vulgaris			Chuvieco, E., Yebra, M., Jurdao, S., Aguado, I., Salas, F. J., García, M., Nieto, H., De Santis, A., Cocero, D., Riaño, D., Martínez, S., Zapico, E., Recondo, C., Martínez-Vega, J., Martín, M.P., Riva, J., Pérez, F. y Rodríguez-Silva, F. (2011): Field Fuel Moisture Measurements on Spanish study sites. Department of Geography, University of Alcalá, Spain. Version 1. Available online at: http://www…
C2_11_34	Chuvieco	AraIBE14	Aragon	Spain	41.1995	-1.18132		2001-08-19	2001	11	Mosaic tree and shrub (>50%) / herbaceous cover (<50%)	53.7811	1	0.0436079	0.0592164	0.1001	0.117503	Lavandula angustifolia			Chuvieco, E., Yebra, M., Jurdao, S., Aguado, I., Salas, F. J., García, M., Nieto, H., De Santis, A., Cocero, D., Riaño, D., Martínez, S., Zapico, E., Recondo, C., Martínez-Vega, J., Martín, M.P., Riva, J., Pérez, F. y Rodríguez-Silva, F. (2011): Field Fuel Moisture Measurements on Spanish study sites. Department of Geography, University of Alcalá, Spain. Version 1. Available online at: http://www…
C2_11_35	Chuvieco	AraIBE14	Aragon	Spain	41.1995	-1.18132		2001-08-19	2001	11	Mosaic tree and shrub (>50%) / herbaceous cover (<50%)	99.0744	1	0.0436079	0.0592164	0.1001	0.117503	Retama sphaerocarpa			Chuvieco, E., Yebra, M., Jurdao, S., Aguado, I., Salas, F. J., García, M., Nieto, H., De Santis, A., Cocero, D., Riaño, D., Martínez, S., Zapico, E., Recondo, C., Martínez-Vega, J., Martín, M.P., Riva, J., Pérez, F. y Rodríguez-Silva, F. (2011): Field Fuel Moisture Measurements on Spanish study sites. Department of Geography, University of Alcalá, Spain. Version 1. Available online at: http://www…
C2_11_36	Chuvieco	AraIBE14	Aragon	Spain	41.1995	-1.18132		2001-08-19	2001	11	Mosaic tree and shrub (>50%) / herbaceous cover (<50%)	53.453	1	0.0436079	0.0592164	0.1001	0.117503	Ulex parviflorus			Chuvieco, E., Yebra, M., Jurdao, S., Aguado, I., Salas, F. J., García, M., Nieto, H., De Santis, A., Cocero, D., Riaño, D., Martínez, S., Zapico, E., Recondo, C., Martínez-Vega, J., Martín, M.P., Riva, J., Pérez, F. y Rodríguez-Silva, F. (2011): Field Fuel Moisture Measurements on Spanish study sites. Department of Geography, University of Alcalá, Spain. Version 1. Available online at: http://www…
C2_11_37	Chuvieco	AraIBE14	Aragon	Spain	41.1995	-1.18132		2001-09-04	2001	11	Mosaic tree and shrub (>50%) / herbaceous cover (<50%)	36.4136	1	0.0436079	0.0592164	0.1001	0.117503	Thymus vulgaris			Chuvieco, E., Yebra, M., Jurdao, S., Aguado, I., Salas, F. J., García, M., Nieto, H., De Santis, A., Cocero, D., Riaño, D., Martínez, S., Zapico, E., Recondo, C., Martínez-Vega, J., Martín, M.P., Riva, J., Pérez, F. y Rodríguez-Silva, F. (2011): Field Fuel Moisture Measurements on Spanish study sites. Department of Geography, University of Alcalá, Spain. Version 1. Available online at: http://www…
C2_11_38	Chuvieco	AraIBE14	Aragon	Spain	41.1995	-1.18132		2001-09-04	2001	11	Mosaic tree and shrub (>50%) / herbaceous cover (<50%)	39.9173	1	0.0436079	0.0592164	0.1001	0.117503	Lavandula angustifolia			Chuvieco, E., Yebra, M., Jurdao, S., Aguado, I., Salas, F. J., García, M., Nieto, H., De Santis, A., Cocero, D., Riaño, D., Martínez, S., Zapico, E., Recondo, C., Martínez-Vega, J., Martín, M.P., Riva, J., Pérez, F. y Rodríguez-Silva, F. (2011): Field Fuel Moisture Measurements on Spanish study sites. Department of Geography, University of Alcalá, Spain. Version 1. Available online at: http://www…
C2_11_39	Chuvieco	AraIBE14	Aragon	Spain	41.1995	-1.18132		2001-09-04	2001	11	Mosaic tree and shrub (>50%) / herbaceous cover (<50%)	110.094	1	0.0436079	0.0592164	0.1001	0.117503	Retama sphaerocarpa			Chuvieco, E., Yebra, M., Jurdao, S., Aguado, I., Salas, F. J., García, M., Nieto, H., De Santis, A., Cocero, D., Riaño, D., Martínez, S., Zapico, E., Recondo, C., Martínez-Vega, J., Martín, M.P., Riva, J., Pérez, F. y Rodríguez-Silva, F. (2011): Field Fuel Moisture Measurements on Spanish study sites. Department of Geography, University of Alcalá, Spain. Version 1. Available online at: http://www…
C2_11_40	Chuvieco	AraIBE14	Aragon	Spain	41.1995	-1.18132		2001-09-04	2001	11	Mosaic tree and shrub (>50%) / herbaceous cover (<50%)	53.8063	1	0.0436079	0.0592164	0.1001	0.117503	Ulex parviflorus			Chuvieco, E., Yebra, M., Jurdao, S., Aguado, I., Salas, F. J., García, M., Nieto, H., De Santis, A., Cocero, D., Riaño, D., Martínez, S., Zapico, E., Recondo, C., Martínez-Vega, J., Martín, M.P., Riva, J., Pérez, F. y Rodríguez-Silva, F. (2011): Field Fuel Moisture Measurements on Spanish study sites. Department of Geography, University of Alcalá, Spain. Version 1. Available online at: http://www…
C2_11_41	Chuvieco	AraIBE14	Aragon	Spain	41.1995	-1.18132		2001-09-20	2001	11	Mosaic tree and shrub (>50%) / herbaceous cover (<50%)	21.1472	1	0.0436079	0.0592164	0.1001	0.117503	Thymus vulgaris			Chuvieco, E., Yebra, M., Jurdao, S., Aguado, I., Salas, F. J., García, M., Nieto, H., De Santis, A., Cocero, D., Riaño, D., Martínez, S., Zapico, E., Recondo, C., Martínez-Vega, J., Martín, M.P., Riva, J., Pérez, F. y Rodríguez-Silva, F. (2011): Field Fuel Moisture Measurements on Spanish study sites. Department of Geography, University of Alcalá, Spain. Version 1. Available online at: http://www…
C2_11_42	Chuvieco	AraIBE14	Aragon	Spain	41.1995	-1.18132		2001-09-20	2001	11	Mosaic tree and shrub (>50%) / herbaceous cover (<50%)	35.9112	1	0.0436079	0.0592164	0.1001	0.117503	Lavandula angustifolia			Chuvieco, E., Yebra, M., Jurdao, S., Aguado, I., Salas, F. J., García, M., Nieto, H., De Santis, A., Cocero, D., Riaño, D., Martínez, S., Zapico, E., Recondo, C., Martínez-Vega, J., Martín, M.P., Riva, J., Pérez, F. y Rodríguez-Silva, F. (2011): Field Fuel Moisture Measurements on Spanish study sites. Department of Geography, University of Alcalá, Spain. Version 1. Available online at: http://www…
C2_11_43	Chuvieco	AraIBE14	Aragon	Spain	41.1995	-1.18132		2001-09-20	2001	11	Mosaic tree and shrub (>50%) / herbaceous cover (<50%)	103.125	1	0.0436079	0.0592164	0.1001	0.117503	Retama sphaerocarpa			Chuvieco, E., Yebra, M., Jurdao, S., Aguado, I., Salas, F. J., García, M., Nieto, H., De Santis, A., Cocero, D., Riaño, D., Martínez, S., Zapico, E., Recondo, C., Martínez-Vega, J., Martín, M.P., Riva, J., Pérez, F. y Rodríguez-Silva, F. (2011): Field Fuel Moisture Measurements on Spanish study sites. Department of Geography, University of Alcalá, Spain. Version 1. Available online at: http://www…
C2_11_44	Chuvieco	AraIBE14	Aragon	Spain	41.1995	-1.18132		2001-09-20	2001	11	Mosaic tree and shrub (>50%) / herbaceous cover (<50%)	51.6504	1	0.0436079	0.0592164	0.1001	0.117503	Ulex parviflorus			Chuvieco, E., Yebra, M., Jurdao, S., Aguado, I., Salas, F. J., García, M., Nieto, H., De Santis, A., Cocero, D., Riaño, D., Martínez, S., Zapico, E., Recondo, C., Martínez-Vega, J., Martín, M.P., Riva, J., Pérez, F. y Rodríguez-Silva, F. (2011): Field Fuel Moisture Measurements on Spanish study sites. Department of Geography, University of Alcalá, Spain. Version 1. Available online at: http://www…
C2_11_45	Chuvieco	AraIBE14	Aragon	Spain	41.1995	-1.18132		2002-04-08	2002	11	Mosaic tree and shrub (>50%) / herbaceous cover (<50%)	49.3478	1	0.0436079	0.0592164	0.1001	0.117503	Thymus vulgaris			Chuvieco, E., Yebra, M., Jurdao, S., Aguado, I., Salas, F. J., García, M., Nieto, H., De Santis, A., Cocero, D., Riaño, D., Martínez, S., Zapico, E., Recondo, C., Martínez-Vega, J., Martín, M.P., Riva, J., Pérez, F. y Rodríguez-Silva, F. (2011): Field Fuel Moisture Measurements on Spanish study sites. Department of Geography, University of Alcalá, Spain. Version 1. Available online at: http://www…
C2_11_46	Chuvieco	AraIBE14	Aragon	Spain	41.1995	-1.18132		2002-04-08	2002	11	Mosaic tree and shrub (>50%) / herbaceous cover (<50%)	77.0275	1	0.0436079	0.0592164	0.1001	0.117503	Lavandula angustifolia			Chuvieco, E., Yebra, M., Jurdao, S., Aguado, I., Salas, F. J., García, M., Nieto, H., De Santis, A., Cocero, D., Riaño, D., Martínez, S., Zapico, E., Recondo, C., Martínez-Vega, J., Martín, M.P., Riva, J., Pérez, F. y Rodríguez-Silva, F. (2011): Field Fuel Moisture Measurements on Spanish study sites. Department of Geography, University of Alcalá, Spain. Version 1. Available online at: http://www…
C2_11_47	Chuvieco	AraIBE14	Aragon	Spain	41.1995	-1.18132		2002-04-08	2002	11	Mosaic tree and shrub (>50%) / herbaceous cover (<50%)	102.982	1	0.0436079	0.0592164	0.1001	0.117503	Retama sphaerocarpa			Chuvieco, E., Yebra, M., Jurdao, S., Aguado, I., Salas, F. J., García, M., Nieto, H., De Santis, A., Cocero, D., Riaño, D., Martínez, S., Zapico, E., Recondo, C., Martínez-Vega, J., Martín, M.P., Riva, J., Pérez, F. y Rodríguez-Silva, F. (2011): Field Fuel Moisture Measurements on Spanish study sites. Department of Geography, University of Alcalá, Spain. Version 1. Available online at: http://www…
C2_11_48	Chuvieco	AraIBE14	Aragon	Spain	41.1995	-1.18132		2002-04-08	2002	11	Mosaic tree and shrub (>50%) / herbaceous cover (<50%)	79.892	1	0.0436079	0.0592164	0.1001	0.117503	Ulex parviflorus			Chuvieco, E., Yebra, M., Jurdao, S., Aguado, I., Salas, F. J., García, M., Nieto, H., De Santis, A., Cocero, D., Riaño, D., Martínez, S., Zapico, E., Recondo, C., Martínez-Vega, J., Martín, M.P., Riva, J., Pérez, F. y Rodríguez-Silva, F. (2011): Field Fuel Moisture Measurements on Spanish study sites. Department of Geography, University of Alcalá, Spain. Version 1. Available online at: http://www…
C2_11_49	Chuvieco	AraIBE14	Aragon	Spain	41.1995	-1.18132		2002-04-24	2002	11	Mosaic tree and shrub (>50%) / herbaceous cover (<50%)	104.345	1	0.0436079	0.0592164	0.1001	0.117503	Thymus vulgaris			Chuvieco, E., Yebra, M., Jurdao, S., Aguado, I., Salas, F. J., García, M., Nieto, H., De Santis, A., Cocero, D., Riaño, D., Martínez, S., Zapico, E., Recondo, C., Martínez-Vega, J., Martín, M.P., Riva, J., Pérez, F. y Rodríguez-Silva, F. (2011): Field Fuel Moisture Measurements on Spanish study sites. Department of Geography, University of Alcalá, Spain. Version 1. Available online at: http://www…
C2_11_50	Chuvieco	AraIBE14	Aragon	Spain	41.1995	-1.18132		2002-04-24	2002	11	Mosaic tree and shrub (>50%) / herbaceous cover (<50%)	121.408	1	0.0436079	0.0592164	0.1001	0.117503	Lavandula angustifolia			Chuvieco, E., Yebra, M., Jurdao, S., Aguado, I., Salas, F. J., García, M., Nieto, H., De Santis, A., Cocero, D., Riaño, D., Martínez, S., Zapico, E., Recondo, C., Martínez-Vega, J., Martín, M.P., Riva, J., Pérez, F. y Rodríguez-Silva, F. (2011): Field Fuel Moisture Measurements on Spanish study sites. Department of Geography, University of Alcalá, Spain. Version 1. Available online at: http://www…
C2_11_51	Chuvieco	AraIBE14	Aragon	Spain	41.1995	-1.18132		2002-04-24	2002	11	Mosaic tree and shrub (>50%) / herbaceous cover (<50%)	95.2961	1	0.0436079	0.0592164	0.1001	0.117503	Retama sphaerocarpa			Chuvieco, E., Yebra, M., Jurdao, S., Aguado, I., Salas, F. J., García, M., Nieto, H., De Santis, A., Cocero, D., Riaño, D., Martínez, S., Zapico, E., Recondo, C., Martínez-Vega, J., Martín, M.P., Riva, J., Pérez, F. y Rodríguez-Silva, F. (2011): Field Fuel Moisture Measurements on Spanish study sites. Department of Geography, University of Alcalá, Spain. Version 1. Available online at: http://www…
C2_11_52	Chuvieco	AraIBE14	Aragon	Spain	41.1995	-1.18132		2002-04-24	2002	11	Mosaic tree and shrub (>50%) / herbaceous cover (<50%)	74.7794	1	0.0436079	0.0592164	0.1001	0.117503	Ulex parviflorus			Chuvieco, E., Yebra, M., Jurdao, S., Aguado, I., Salas, F. J., García, M., Nieto, H., De Santis, A., Cocero, D., Riaño, D., Martínez, S., Zapico, E., Recondo, C., Martínez-Vega, J., Martín, M.P., Riva, J., Pérez, F. y Rodríguez-Silva, F. (2011): Field Fuel Moisture Measurements on Spanish study sites. Department of Geography, University of Alcalá, Spain. Version 1. Available online at: http://www…
C2_11_53	Chuvieco	AraIBE14	Aragon	Spain	41.1995	-1.18132		2002-05-26	2002	11	Mosaic tree and shrub (>50%) / herbaceous cover (<50%)	121.559	1	0.0436079	0.0592164	0.1001	0.117503	Thymus vulgaris			Chuvieco, E., Yebra, M., Jurdao, S., Aguado, I., Salas, F. J., García, M., Nieto, H., De Santis, A., Cocero, D., Riaño, D., Martínez, S., Zapico, E., Recondo, C., Martínez-Vega, J., Martín, M.P., Riva, J., Pérez, F. y Rodríguez-Silva, F. (2011): Field Fuel Moisture Measurements on Spanish study sites. Department of Geography, University of Alcalá, Spain. Version 1. Available online at: http://www…
C2_11_54	Chuvieco	AraIBE14	Aragon	Spain	41.1995	-1.18132		2002-05-26	2002	11	Mosaic tree and shrub (>50%) / herbaceous cover (<50%)	200.801	1	0.0436079	0.0592164	0.1001	0.117503	Lavandula angustifolia			Chuvieco, E., Yebra, M., Jurdao, S., Aguado, I., Salas, F. J., García, M., Nieto, H., De Santis, A., Cocero, D., Riaño, D., Martínez, S., Zapico, E., Recondo, C., Martínez-Vega, J., Martín, M.P., Riva, J., Pérez, F. y Rodríguez-Silva, F. (2011): Field Fuel Moisture Measurements on Spanish study sites. Department of Geography, University of Alcalá, Spain. Version 1. Available online at: http://www…
C2_11_55	Chuvieco	AraIBE14	Aragon	Spain	41.1995	-1.18132		2002-05-26	2002	11	Mosaic tree and shrub (>50%) / herbaceous cover (<50%)	163.486	1	0.0436079	0.0592164	0.1001	0.117503	Retama sphaerocarpa			Chuvieco, E., Yebra, M., Jurdao, S., Aguado, I., Salas, F. J., García, M., Nieto, H., De Santis, A., Cocero, D., Riaño, D., Martínez, S., Zapico, E., Recondo, C., Martínez-Vega, J., Martín, M.P., Riva, J., Pérez, F. y Rodríguez-Silva, F. (2011): Field Fuel Moisture Measurements on Spanish study sites. Department of Geography, University of Alcalá, Spain. Version 1. Available online at: http://www…
C2_11_56	Chuvieco	AraIBE14	Aragon	Spain	41.1995	-1.18132		2002-05-26	2002	11	Mosaic tree and shrub (>50%) / herbaceous cover (<50%)	92.5825	1	0.0436079	0.0592164	0.1001	0.117503	Ulex parviflorus			Chuvieco, E., Yebra, M., Jurdao, S., Aguado, I., Salas, F. J., García, M., Nieto, H., De Santis, A., Cocero, D., Riaño, D., Martínez, S., Zapico, E., Recondo, C., Martínez-Vega, J., Martín, M.P., Riva, J., Pérez, F. y Rodríguez-Silva, F. (2011): Field Fuel Moisture Measurements on Spanish study sites. Department of Geography, University of Alcalá, Spain. Version 1. Available online at: http://www…
C2_11_57	Chuvieco	AraIBE14	Aragon	Spain	41.1995	-1.18132		2002-06-11	2002	11	Mosaic tree and shrub (>50%) / herbaceous cover (<50%)	137.841	1	0.0436079	0.0592164	0.1001	0.117503	Thymus vulgaris			Chuvieco, E., Yebra, M., Jurdao, S., Aguado, I., Salas, F. J., García, M., Nieto, H., De Santis, A., Cocero, D., Riaño, D., Martínez, S., Zapico, E., Recondo, C., Martínez-Vega, J., Martín, M.P., Riva, J., Pérez, F. y Rodríguez-Silva, F. (2011): Field Fuel Moisture Measurements on Spanish study sites. Department of Geography, University of Alcalá, Spain. Version 1. Available online at: http://www…
C2_11_58	Chuvieco	AraIBE14	Aragon	Spain	41.1995	-1.18132		2002-06-11	2002	11	Mosaic tree and shrub (>50%) / herbaceous cover (<50%)	152.15	1	0.0436079	0.0592164	0.1001	0.117503	Lavandula angustifolia			Chuvieco, E., Yebra, M., Jurdao, S., Aguado, I., Salas, F. J., García, M., Nieto, H., De Santis, A., Cocero, D., Riaño, D., Martínez, S., Zapico, E., Recondo, C., Martínez-Vega, J., Martín, M.P., Riva, J., Pérez, F. y Rodríguez-Silva, F. (2011): Field Fuel Moisture Measurements on Spanish study sites. Department of Geography, University of Alcalá, Spain. Version 1. Available online at: http://www…
C2_11_59	Chuvieco	AraIBE14	Aragon	Spain	41.1995	-1.18132		2002-06-11	2002	11	Mosaic tree and shrub (>50%) / herbaceous cover (<50%)	214.542	1	0.0436079	0.0592164	0.1001	0.117503	Retama sphaerocarpa			Chuvieco, E., Yebra, M., Jurdao, S., Aguado, I., Salas, F. J., García, M., Nieto, H., De Santis, A., Cocero, D., Riaño, D., Martínez, S., Zapico, E., Recondo, C., Martínez-Vega, J., Martín, M.P., Riva, J., Pérez, F. y Rodríguez-Silva, F. (2011): Field Fuel Moisture Measurements on Spanish study sites. Department of Geography, University of Alcalá, Spain. Version 1. Available online at: http://www…
C2_11_60	Chuvieco	AraIBE14	Aragon	Spain	41.1995	-1.18132		2002-06-11	2002	11	Mosaic tree and shrub (>50%) / herbaceous cover (<50%)	108.84	1	0.0436079	0.0592164	0.1001	0.117503	Ulex parviflorus			Chuvieco, E., Yebra, M., Jurdao, S., Aguado, I., Salas, F. J., García, M., Nieto, H., De Santis, A., Cocero, D., Riaño, D., Martínez, S., Zapico, E., Recondo, C., Martínez-Vega, J., Martín, M.P., Riva, J., Pérez, F. y Rodríguez-Silva, F. (2011): Field Fuel Moisture Measurements on Spanish study sites. Department of Geography, University of Alcalá, Spain. Version 1. Available online at: http://www…
C2_11_61	Chuvieco	AraIBE14	Aragon	Spain	41.1995	-1.18132		2002-06-27	2002	11	Mosaic tree and shrub (>50%) / herbaceous cover (<50%)	57.783	1	0.0436079	0.0592164	0.1001	0.117503	Thymus vulgaris			Chuvieco, E., Yebra, M., Jurdao, S., Aguado, I., Salas, F. J., García, M., Nieto, H., De Santis, A., Cocero, D., Riaño, D., Martínez, S., Zapico, E., Recondo, C., Martínez-Vega, J., Martín, M.P., Riva, J., Pérez, F. y Rodríguez-Silva, F. (2011): Field Fuel Moisture Measurements on Spanish study sites. Department of Geography, University of Alcalá, Spain. Version 1. Available online at: http://www…
C2_11_62	Chuvieco	AraIBE14	Aragon	Spain	41.1995	-1.18132		2002-06-27	2002	11	Mosaic tree and shrub (>50%) / herbaceous cover (<50%)	45.1944	1	0.0436079	0.0592164	0.1001	0.117503	Lavandula angustifolia			Chuvieco, E., Yebra, M., Jurdao, S., Aguado, I., Salas, F. J., García, M., Nieto, H., De Santis, A., Cocero, D., Riaño, D., Martínez, S., Zapico, E., Recondo, C., Martínez-Vega, J., Martín, M.P., Riva, J., Pérez, F. y Rodríguez-Silva, F. (2011): Field Fuel Moisture Measurements on Spanish study sites. Department of Geography, University of Alcalá, Spain. Version 1. Available online at: http://www…
C2_11_63	Chuvieco	AraIBE14	Aragon	Spain	41.1995	-1.18132		2002-06-27	2002	11	Mosaic tree and shrub (>50%) / herbaceous cover (<50%)	155.292	1	0.0436079	0.0592164	0.1001	0.117503	Retama sphaerocarpa			Chuvieco, E., Yebra, M., Jurdao, S., Aguado, I., Salas, F. J., García, M., Nieto, H., De Santis, A., Cocero, D., Riaño, D., Martínez, S., Zapico, E., Recondo, C., Martínez-Vega, J., Martín, M.P., Riva, J., Pérez, F. y Rodríguez-Silva, F. (2011): Field Fuel Moisture Measurements on Spanish study sites. Department of Geography, University of Alcalá, Spain. Version 1. Available online at: http://www…
C2_11_64	Chuvieco	AraIBE14	Aragon	Spain	41.1995	-1.18132		2002-06-27	2002	11	Mosaic tree and shrub (>50%) / herbaceous cover (<50%)	103.198	1	0.0436079	0.0592164	0.1001	0.117503	Ulex parviflorus			Chuvieco, E., Yebra, M., Jurdao, S., Aguado, I., Salas, F. J., García, M., Nieto, H., De Santis, A., Cocero, D., Riaño, D., Martínez, S., Zapico, E., Recondo, C., Martínez-Vega, J., Martín, M.P., Riva, J., Pérez, F. y Rodríguez-Silva, F. (2011): Field Fuel Moisture Measurements on Spanish study sites. Department of Geography, University of Alcalá, Spain. Version 1. Available online at: http://www…
C2_11_65	Chuvieco	AraIBE14	Aragon	Spain	41.1995	-1.18132		2002-07-13	2002	11	Mosaic tree and shrub (>50%) / herbaceous cover (<50%)	44.3062	1	0.0436079	0.0592164	0.1001	0.117503	Thymus vulgaris			Chuvieco, E., Yebra, M., Jurdao, S., Aguado, I., Salas, F. J., García, M., Nieto, H., De Santis, A., Cocero, D., Riaño, D., Martínez, S., Zapico, E., Recondo, C., Martínez-Vega, J., Martín, M.P., Riva, J., Pérez, F. y Rodríguez-Silva, F. (2011): Field Fuel Moisture Measurements on Spanish study sites. Department of Geography, University of Alcalá, Spain. Version 1. Available online at: http://www…
C2_11_66	Chuvieco	AraIBE14	Aragon	Spain	41.1995	-1.18132		2002-07-13	2002	11	Mosaic tree and shrub (>50%) / herbaceous cover (<50%)	83.3867	1	0.0436079	0.0592164	0.1001	0.117503	Lavandula angustifolia			Chuvieco, E., Yebra, M., Jurdao, S., Aguado, I., Salas, F. J., García, M., Nieto, H., De Santis, A., Cocero, D., Riaño, D., Martínez, S., Zapico, E., Recondo, C., Martínez-Vega, J., Martín, M.P., Riva, J., Pérez, F. y Rodríguez-Silva, F. (2011): Field Fuel Moisture Measurements on Spanish study sites. Department of Geography, University of Alcalá, Spain. Version 1. Available online at: http://www…
C2_11_67	Chuvieco	AraIBE14	Aragon	Spain	41.1995	-1.18132		2002-07-13	2002	11	Mosaic tree and shrub (>50%) / herbaceous cover (<50%)	166.392	1	0.0436079	0.0592164	0.1001	0.117503	Retama sphaerocarpa			Chuvieco, E., Yebra, M., Jurdao, S., Aguado, I., Salas, F. J., García, M., Nieto, H., De Santis, A., Cocero, D., Riaño, D., Martínez, S., Zapico, E., Recondo, C., Martínez-Vega, J., Martín, M.P., Riva, J., Pérez, F. y Rodríguez-Silva, F. (2011): Field Fuel Moisture Measurements on Spanish study sites. Department of Geography, University of Alcalá, Spain. Version 1. Available online at: http://www…
C2_11_68	Chuvieco	AraIBE14	Aragon	Spain	41.1995	-1.18132		2002-07-13	2002	11	Mosaic tree and shrub (>50%) / herbaceous cover (<50%)	89.0665	1	0.0436079	0.0592164	0.1001	0.117503	Ulex parviflorus			Chuvieco, E., Yebra, M., Jurdao, S., Aguado, I., Salas, F. J., García, M., Nieto, H., De Santis, A., Cocero, D., Riaño, D., Martínez, S., Zapico, E., Recondo, C., Martínez-Vega, J., Martín, M.P., Riva, J., Pérez, F. y Rodríguez-Silva, F. (2011): Field Fuel Moisture Measurements on Spanish study sites. Department of Geography, University of Alcalá, Spain. Version 1. Available online at: http://www…
C2_11_69	Chuvieco	AraIBE14	Aragon	Spain	41.1995	-1.18132		2002-07-29	2002	11	Mosaic tree and shrub (>50%) / herbaceous cover (<50%)	43.3515	1	0.0436079	0.0592164	0.1001	0.117503	Thymus vulgaris			Chuvieco, E., Yebra, M., Jurdao, S., Aguado, I., Salas, F. J., García, M., Nieto, H., De Santis, A., Cocero, D., Riaño, D., Martínez, S., Zapico, E., Recondo, C., Martínez-Vega, J., Martín, M.P., Riva, J., Pérez, F. y Rodríguez-Silva, F. (2011): Field Fuel Moisture Measurements on Spanish study sites. Department of Geography, University of Alcalá, Spain. Version 1. Available online at: http://www…
C2_11_70	Chuvieco	AraIBE14	Aragon	Spain	41.1995	-1.18132		2002-07-29	2002	11	Mosaic tree and shrub (>50%) / herbaceous cover (<50%)	37.9401	1	0.0436079	0.0592164	0.1001	0.117503	Lavandula angustifolia			Chuvieco, E., Yebra, M., Jurdao, S., Aguado, I., Salas, F. J., García, M., Nieto, H., De Santis, A., Cocero, D., Riaño, D., Martínez, S., Zapico, E., Recondo, C., Martínez-Vega, J., Martín, M.P., Riva, J., Pérez, F. y Rodríguez-Silva, F. (2011): Field Fuel Moisture Measurements on Spanish study sites. Department of Geography, University of Alcalá, Spain. Version 1. Available online at: http://www…
C2_11_71	Chuvieco	AraIBE14	Aragon	Spain	41.1995	-1.18132		2002-07-29	2002	11	Mosaic tree and shrub (>50%) / herbaceous cover (<50%)	124.271	1	0.0436079	0.0592164	0.1001	0.117503	Retama sphaerocarpa			Chuvieco, E., Yebra, M., Jurdao, S., Aguado, I., Salas, F. J., García, M., Nieto, H., De Santis, A., Cocero, D., Riaño, D., Martínez, S., Zapico, E., Recondo, C., Martínez-Vega, J., Martín, M.P., Riva, J., Pérez, F. y Rodríguez-Silva, F. (2011): Field Fuel Moisture Measurements on Spanish study sites. Department of Geography, University of Alcalá, Spain. Version 1. Available online at: http://www…
C2_11_72	Chuvieco	AraIBE14	Aragon	Spain	41.1995	-1.18132		2002-07-29	2002	11	Mosaic tree and shrub (>50%) / herbaceous cover (<50%)	64.0028	1	0.0436079	0.0592164	0.1001	0.117503	Ulex parviflorus			Chuvieco, E., Yebra, M., Jurdao, S., Aguado, I., Salas, F. J., García, M., Nieto, H., De Santis, A., Cocero, D., Riaño, D., Martínez, S., Zapico, E., Recondo, C., Martínez-Vega, J., Martín, M.P., Riva, J., Pérez, F. y Rodríguez-Silva, F. (2011): Field Fuel Moisture Measurements on Spanish study sites. Department of Geography, University of Alcalá, Spain. Version 1. Available online at: http://www…
C2_11_73	Chuvieco	AraIBE14	Aragon	Spain	41.1995	-1.18132		2002-08-30	2002	11	Mosaic tree and shrub (>50%) / herbaceous cover (<50%)	83.3125	1	0.0436079	0.0592164	0.1001	0.117503	Thymus vulgaris			Chuvieco, E., Yebra, M., Jurdao, S., Aguado, I., Salas, F. J., García, M., Nieto, H., De Santis, A., Cocero, D., Riaño, D., Martínez, S., Zapico, E., Recondo, C., Martínez-Vega, J., Martín, M.P., Riva, J., Pérez, F. y Rodríguez-Silva, F. (2011): Field Fuel Moisture Measurements on Spanish study sites. Department of Geography, University of Alcalá, Spain. Version 1. Available online at: http://www…
C2_11_74	Chuvieco	AraIBE14	Aragon	Spain	41.1995	-1.18132		2002-08-30	2002	11	Mosaic tree and shrub (>50%) / herbaceous cover (<50%)	100.888	1	0.0436079	0.0592164	0.1001	0.117503	Lavandula angustifolia			Chuvieco, E., Yebra, M., Jurdao, S., Aguado, I., Salas, F. J., García, M., Nieto, H., De Santis, A., Cocero, D., Riaño, D., Martínez, S., Zapico, E., Recondo, C., Martínez-Vega, J., Martín, M.P., Riva, J., Pérez, F. y Rodríguez-Silva, F. (2011): Field Fuel Moisture Measurements on Spanish study sites. Department of Geography, University of Alcalá, Spain. Version 1. Available online at: http://www…
C2_11_75	Chuvieco	AraIBE14	Aragon	Spain	41.1995	-1.18132		2002-08-30	2002	11	Mosaic tree and shrub (>50%) / herbaceous cover (<50%)	126.93	1	0.0436079	0.0592164	0.1001	0.117503	Retama sphaerocarpa			Chuvieco, E., Yebra, M., Jurdao, S., Aguado, I., Salas, F. J., García, M., Nieto, H., De Santis, A., Cocero, D., Riaño, D., Martínez, S., Zapico, E., Recondo, C., Martínez-Vega, J., Martín, M.P., Riva, J., Pérez, F. y Rodríguez-Silva, F. (2011): Field Fuel Moisture Measurements on Spanish study sites. Department of Geography, University of Alcalá, Spain. Version 1. Available online at: http://www…
C2_11_76	Chuvieco	AraIBE14	Aragon	Spain	41.1995	-1.18132		2002-08-30	2002	11	Mosaic tree and shrub (>50%) / herbaceous cover (<50%)	60.7793	1	0.0436079	0.0592164	0.1001	0.117503	Ulex parviflorus			Chuvieco, E., Yebra, M., Jurdao, S., Aguado, I., Salas, F. J., García, M., Nieto, H., De Santis, A., Cocero, D., Riaño, D., Martínez, S., Zapico, E., Recondo, C., Martínez-Vega, J., Martín, M.P., Riva, J., Pérez, F. y Rodríguez-Silva, F. (2011): Field Fuel Moisture Measurements on Spanish study sites. Department of Geography, University of Alcalá, Spain. Version 1. Available online at: http://www…
C2_11_77	Chuvieco	AraIBE14	Aragon	Spain	41.1995	-1.18132		2002-09-15	2002	11	Mosaic tree and shrub (>50%) / herbaceous cover (<50%)	60.5187	1	0.0436079	0.0592164	0.1001	0.117503	Thymus vulgaris			Chuvieco, E., Yebra, M., Jurdao, S., Aguado, I., Salas, F. J., García, M., Nieto, H., De Santis, A., Cocero, D., Riaño, D., Martínez, S., Zapico, E., Recondo, C., Martínez-Vega, J., Martín, M.P., Riva, J., Pérez, F. y Rodríguez-Silva, F. (2011): Field Fuel Moisture Measurements on Spanish study sites. Department of Geography, University of Alcalá, Spain. Version 1. Available online at: http://www…
C2_11_78	Chuvieco	AraIBE14	Aragon	Spain	41.1995	-1.18132		2002-09-15	2002	11	Mosaic tree and shrub (>50%) / herbaceous cover (<50%)	46.6544	1	0.0436079	0.0592164	0.1001	0.117503	Lavandula angustifolia			Chuvieco, E., Yebra, M., Jurdao, S., Aguado, I., Salas, F. J., García, M., Nieto, H., De Santis, A., Cocero, D., Riaño, D., Martínez, S., Zapico, E., Recondo, C., Martínez-Vega, J., Martín, M.P., Riva, J., Pérez, F. y Rodríguez-Silva, F. (2011): Field Fuel Moisture Measurements on Spanish study sites. Department of Geography, University of Alcalá, Spain. Version 1. Available online at: http://www…
C2_11_79	Chuvieco	AraIBE14	Aragon	Spain	41.1995	-1.18132		2002-09-15	2002	11	Mosaic tree and shrub (>50%) / herbaceous cover (<50%)	110.324	1	0.0436079	0.0592164	0.1001	0.117503	Retama sphaerocarpa			Chuvieco, E., Yebra, M., Jurdao, S., Aguado, I., Salas, F. J., García, M., Nieto, H., De Santis, A., Cocero, D., Riaño, D., Martínez, S., Zapico, E., Recondo, C., Martínez-Vega, J., Martín, M.P., Riva, J., Pérez, F. y Rodríguez-Silva, F. (2011): Field Fuel Moisture Measurements on Spanish study sites. Department of Geography, University of Alcalá, Spain. Version 1. Available online at: http://www…
C2_11_80	Chuvieco	AraIBE14	Aragon	Spain	41.1995	-1.18132		2002-09-15	2002	11	Mosaic tree and shrub (>50%) / herbaceous cover (<50%)	57.0492	1	0.0436079	0.0592164	0.1001	0.117503	Ulex parviflorus			Chuvieco, E., Yebra, M., Jurdao, S., Aguado, I., Salas, F. J., García, M., Nieto, H., De Santis, A., Cocero, D., Riaño, D., Martínez, S., Zapico, E., Recondo, C., Martínez-Vega, J., Martín, M.P., Riva, J., Pérez, F. y Rodríguez-Silva, F. (2011): Field Fuel Moisture Measurements on Spanish study sites. Department of Geography, University of Alcalá, Spain. Version 1. Available online at: http://www…
C2_12_1	Chuvieco	AraIBE15	Aragon	Spain	41.2554	-1.29915		2001-04-12	2001	11	Shrubland	87.3741	1	0.0512864	0.0900374	0.104101	0.194783	Thymus vulgaris			Chuvieco, E., Yebra, M., Jurdao, S., Aguado, I., Salas, F. J., García, M., Nieto, H., De Santis, A., Cocero, D., Riaño, D., Martínez, S., Zapico, E., Recondo, C., Martínez-Vega, J., Martín, M.P., Riva, J., Pérez, F. y Rodríguez-Silva, F. (2011): Field Fuel Moisture Measurements on Spanish study sites. Department of Geography, University of Alcalá, Spain. Version 1. Available online at: http://www…
C2_12_2	Chuvieco	AraIBE15	Aragon	Spain	41.2554	-1.29915		2001-04-12	2001	11	Shrubland	70.023	1	0.0512864	0.0900374	0.104101	0.194783	Ulex parviflorus			Chuvieco, E., Yebra, M., Jurdao, S., Aguado, I., Salas, F. J., García, M., Nieto, H., De Santis, A., Cocero, D., Riaño, D., Martínez, S., Zapico, E., Recondo, C., Martínez-Vega, J., Martín, M.P., Riva, J., Pérez, F. y Rodríguez-Silva, F. (2011): Field Fuel Moisture Measurements on Spanish study sites. Department of Geography, University of Alcalá, Spain. Version 1. Available online at: http://www…
C2_12_3	Chuvieco	AraIBE15	Aragon	Spain	41.2554	-1.29915		2001-04-29	2001	11	Shrubland	97.7342	1	0.0512864	0.0900374	0.104101	0.194783	Thymus vulgaris			Chuvieco, E., Yebra, M., Jurdao, S., Aguado, I., Salas, F. J., García, M., Nieto, H., De Santis, A., Cocero, D., Riaño, D., Martínez, S., Zapico, E., Recondo, C., Martínez-Vega, J., Martín, M.P., Riva, J., Pérez, F. y Rodríguez-Silva, F. (2011): Field Fuel Moisture Measurements on Spanish study sites. Department of Geography, University of Alcalá, Spain. Version 1. Available online at: http://www…
C2_12_4	Chuvieco	AraIBE15	Aragon	Spain	41.2554	-1.29915		2001-04-29	2001	11	Shrubland	73.1905	1	0.0512864	0.0900374	0.104101	0.194783	Ulex parviflorus			Chuvieco, E., Yebra, M., Jurdao, S., Aguado, I., Salas, F. J., García, M., Nieto, H., De Santis, A., Cocero, D., Riaño, D., Martínez, S., Zapico, E., Recondo, C., Martínez-Vega, J., Martín, M.P., Riva, J., Pérez, F. y Rodríguez-Silva, F. (2011): Field Fuel Moisture Measurements on Spanish study sites. Department of Geography, University of Alcalá, Spain. Version 1. Available online at: http://www…
C2_12_5	Chuvieco	AraIBE15	Aragon	Spain	41.2554	-1.29915		2001-05-15	2001	11	Shrubland	130.241	1	0.0512864	0.0900374	0.104101	0.194783	Thymus vulgaris			Chuvieco, E., Yebra, M., Jurdao, S., Aguado, I., Salas, F. J., García, M., Nieto, H., De Santis, A., Cocero, D., Riaño, D., Martínez, S., Zapico, E., Recondo, C., Martínez-Vega, J., Martín, M.P., Riva, J., Pérez, F. y Rodríguez-Silva, F. (2011): Field Fuel Moisture Measurements on Spanish study sites. Department of Geography, University of Alcalá, Spain. Version 1. Available online at: http://www…
C2_12_6	Chuvieco	AraIBE15	Aragon	Spain	41.2554	-1.29915		2001-05-15	2001	11	Shrubland	71.7302	1	0.0512864	0.0900374	0.104101	0.194783	Ulex parviflorus			Chuvieco, E., Yebra, M., Jurdao, S., Aguado, I., Salas, F. J., García, M., Nieto, H., De Santis, A., Cocero, D., Riaño, D., Martínez, S., Zapico, E., Recondo, C., Martínez-Vega, J., Martín, M.P., Riva, J., Pérez, F. y Rodríguez-Silva, F. (2011): Field Fuel Moisture Measurements on Spanish study sites. Department of Geography, University of Alcalá, Spain. Version 1. Available online at: http://www…
C2_12_7	Chuvieco	AraIBE15	Aragon	Spain	41.2554	-1.29915		2001-05-31	2001	11	Shrubland	46.5568	1	0.0512864	0.0900374	0.104101	0.194783	Thymus vulgaris			Chuvieco, E., Yebra, M., Jurdao, S., Aguado, I., Salas, F. J., García, M., Nieto, H., De Santis, A., Cocero, D., Riaño, D., Martínez, S., Zapico, E., Recondo, C., Martínez-Vega, J., Martín, M.P., Riva, J., Pérez, F. y Rodríguez-Silva, F. (2011): Field Fuel Moisture Measurements on Spanish study sites. Department of Geography, University of Alcalá, Spain. Version 1. Available online at: http://www…
C2_12_8	Chuvieco	AraIBE15	Aragon	Spain	41.2554	-1.29915		2001-05-31	2001	11	Shrubland	55.4273	1	0.0512864	0.0900374	0.104101	0.194783	Ulex parviflorus			Chuvieco, E., Yebra, M., Jurdao, S., Aguado, I., Salas, F. J., García, M., Nieto, H., De Santis, A., Cocero, D., Riaño, D., Martínez, S., Zapico, E., Recondo, C., Martínez-Vega, J., Martín, M.P., Riva, J., Pérez, F. y Rodríguez-Silva, F. (2011): Field Fuel Moisture Measurements on Spanish study sites. Department of Geography, University of Alcalá, Spain. Version 1. Available online at: http://www…
C2_12_9	Chuvieco	AraIBE15	Aragon	Spain	41.2554	-1.29915		2001-06-16	2001	11	Shrubland	59.3222	1	0.0512864	0.0900374	0.104101	0.194783	Thymus vulgaris			Chuvieco, E., Yebra, M., Jurdao, S., Aguado, I., Salas, F. J., García, M., Nieto, H., De Santis, A., Cocero, D., Riaño, D., Martínez, S., Zapico, E., Recondo, C., Martínez-Vega, J., Martín, M.P., Riva, J., Pérez, F. y Rodríguez-Silva, F. (2011): Field Fuel Moisture Measurements on Spanish study sites. Department of Geography, University of Alcalá, Spain. Version 1. Available online at: http://www…
C2_12_10	Chuvieco	AraIBE15	Aragon	Spain	41.2554	-1.29915		2001-06-16	2001	11	Shrubland	44.7433	1	0.0512864	0.0900374	0.104101	0.194783	Ulex parviflorus			Chuvieco, E., Yebra, M., Jurdao, S., Aguado, I., Salas, F. J., García, M., Nieto, H., De Santis, A., Cocero, D., Riaño, D., Martínez, S., Zapico, E., Recondo, C., Martínez-Vega, J., Martín, M.P., Riva, J., Pérez, F. y Rodríguez-Silva, F. (2011): Field Fuel Moisture Measurements on Spanish study sites. Department of Geography, University of Alcalá, Spain. Version 1. Available online at: http://www…
C2_12_11	Chuvieco	AraIBE15	Aragon	Spain	41.2554	-1.29915		2001-07-02	2001	11	Shrubland	27.0939	1	0.0512864	0.0900374	0.104101	0.194783	Thymus vulgaris			Chuvieco, E., Yebra, M., Jurdao, S., Aguado, I., Salas, F. J., García, M., Nieto, H., De Santis, A., Cocero, D., Riaño, D., Martínez, S., Zapico, E., Recondo, C., Martínez-Vega, J., Martín, M.P., Riva, J., Pérez, F. y Rodríguez-Silva, F. (2011): Field Fuel Moisture Measurements on Spanish study sites. Department of Geography, University of Alcalá, Spain. Version 1. Available online at: http://www…
C2_12_12	Chuvieco	AraIBE15	Aragon	Spain	41.2554	-1.29915		2001-07-02	2001	11	Shrubland	36.3959	1	0.0512864	0.0900374	0.104101	0.194783	Ulex parviflorus			Chuvieco, E., Yebra, M., Jurdao, S., Aguado, I., Salas, F. J., García, M., Nieto, H., De Santis, A., Cocero, D., Riaño, D., Martínez, S., Zapico, E., Recondo, C., Martínez-Vega, J., Martín, M.P., Riva, J., Pérez, F. y Rodríguez-Silva, F. (2011): Field Fuel Moisture Measurements on Spanish study sites. Department of Geography, University of Alcalá, Spain. Version 1. Available online at: http://www…
C2_12_13	Chuvieco	AraIBE15	Aragon	Spain	41.2554	-1.29915		2001-07-18	2001	11	Shrubland	42.845	1	0.0512864	0.0900374	0.104101	0.194783	Thymus vulgaris			Chuvieco, E., Yebra, M., Jurdao, S., Aguado, I., Salas, F. J., García, M., Nieto, H., De Santis, A., Cocero, D., Riaño, D., Martínez, S., Zapico, E., Recondo, C., Martínez-Vega, J., Martín, M.P., Riva, J., Pérez, F. y Rodríguez-Silva, F. (2011): Field Fuel Moisture Measurements on Spanish study sites. Department of Geography, University of Alcalá, Spain. Version 1. Available online at: http://www…
C2_12_14	Chuvieco	AraIBE15	Aragon	Spain	41.2554	-1.29915		2001-07-18	2001	11	Shrubland	50.2936	1	0.0512864	0.0900374	0.104101	0.194783	Ulex parviflorus			Chuvieco, E., Yebra, M., Jurdao, S., Aguado, I., Salas, F. J., García, M., Nieto, H., De Santis, A., Cocero, D., Riaño, D., Martínez, S., Zapico, E., Recondo, C., Martínez-Vega, J., Martín, M.P., Riva, J., Pérez, F. y Rodríguez-Silva, F. (2011): Field Fuel Moisture Measurements on Spanish study sites. Department of Geography, University of Alcalá, Spain. Version 1. Available online at: http://www…
C2_12_15	Chuvieco	AraIBE15	Aragon	Spain	41.2554	-1.29915		2001-08-03	2001	11	Shrubland	39.0568	1	0.0512864	0.0900374	0.104101	0.194783	Thymus vulgaris			Chuvieco, E., Yebra, M., Jurdao, S., Aguado, I., Salas, F. J., García, M., Nieto, H., De Santis, A., Cocero, D., Riaño, D., Martínez, S., Zapico, E., Recondo, C., Martínez-Vega, J., Martín, M.P., Riva, J., Pérez, F. y Rodríguez-Silva, F. (2011): Field Fuel Moisture Measurements on Spanish study sites. Department of Geography, University of Alcalá, Spain. Version 1. Available online at: http://www…
C2_12_16	Chuvieco	AraIBE15	Aragon	Spain	41.2554	-1.29915		2001-08-03	2001	11	Shrubland	49.4965	1	0.0512864	0.0900374	0.104101	0.194783	Ulex parviflorus			Chuvieco, E., Yebra, M., Jurdao, S., Aguado, I., Salas, F. J., García, M., Nieto, H., De Santis, A., Cocero, D., Riaño, D., Martínez, S., Zapico, E., Recondo, C., Martínez-Vega, J., Martín, M.P., Riva, J., Pérez, F. y Rodríguez-Silva, F. (2011): Field Fuel Moisture Measurements on Spanish study sites. Department of Geography, University of Alcalá, Spain. Version 1. Available online at: http://www…
C2_12_17	Chuvieco	AraIBE15	Aragon	Spain	41.2554	-1.29915		2001-08-19	2001	11	Shrubland	30.9079	1	0.0512864	0.0900374	0.104101	0.194783	Thymus vulgaris			Chuvieco, E., Yebra, M., Jurdao, S., Aguado, I., Salas, F. J., García, M., Nieto, H., De Santis, A., Cocero, D., Riaño, D., Martínez, S., Zapico, E., Recondo, C., Martínez-Vega, J., Martín, M.P., Riva, J., Pérez, F. y Rodríguez-Silva, F. (2011): Field Fuel Moisture Measurements on Spanish study sites. Department of Geography, University of Alcalá, Spain. Version 1. Available online at: http://www…
C2_12_18	Chuvieco	AraIBE15	Aragon	Spain	41.2554	-1.29915		2001-08-19	2001	11	Shrubland	46.8593	1	0.0512864	0.0900374	0.104101	0.194783	Ulex parviflorus			Chuvieco, E., Yebra, M., Jurdao, S., Aguado, I., Salas, F. J., García, M., Nieto, H., De Santis, A., Cocero, D., Riaño, D., Martínez, S., Zapico, E., Recondo, C., Martínez-Vega, J., Martín, M.P., Riva, J., Pérez, F. y Rodríguez-Silva, F. (2011): Field Fuel Moisture Measurements on Spanish study sites. Department of Geography, University of Alcalá, Spain. Version 1. Available online at: http://www…
C2_12_19	Chuvieco	AraIBE15	Aragon	Spain	41.2554	-1.29915		2001-09-04	2001	11	Shrubland	42.5973	1	0.0512864	0.0900374	0.104101	0.194783	Thymus vulgaris			Chuvieco, E., Yebra, M., Jurdao, S., Aguado, I., Salas, F. J., García, M., Nieto, H., De Santis, A., Cocero, D., Riaño, D., Martínez, S., Zapico, E., Recondo, C., Martínez-Vega, J., Martín, M.P., Riva, J., Pérez, F. y Rodríguez-Silva, F. (2011): Field Fuel Moisture Measurements on Spanish study sites. Department of Geography, University of Alcalá, Spain. Version 1. Available online at: http://www…
C2_12_20	Chuvieco	AraIBE15	Aragon	Spain	41.2554	-1.29915		2001-09-04	2001	11	Shrubland	51.4307	1	0.0512864	0.0900374	0.104101	0.194783	Ulex parviflorus			Chuvieco, E., Yebra, M., Jurdao, S., Aguado, I., Salas, F. J., García, M., Nieto, H., De Santis, A., Cocero, D., Riaño, D., Martínez, S., Zapico, E., Recondo, C., Martínez-Vega, J., Martín, M.P., Riva, J., Pérez, F. y Rodríguez-Silva, F. (2011): Field Fuel Moisture Measurements on Spanish study sites. Department of Geography, University of Alcalá, Spain. Version 1. Available online at: http://www…
C2_12_21	Chuvieco	AraIBE15	Aragon	Spain	41.2554	-1.29915		2001-09-20	2001	11	Shrubland	43.4208	1	0.0512864	0.0900374	0.104101	0.194783	Thymus vulgaris			Chuvieco, E., Yebra, M., Jurdao, S., Aguado, I., Salas, F. J., García, M., Nieto, H., De Santis, A., Cocero, D., Riaño, D., Martínez, S., Zapico, E., Recondo, C., Martínez-Vega, J., Martín, M.P., Riva, J., Pérez, F. y Rodríguez-Silva, F. (2011): Field Fuel Moisture Measurements on Spanish study sites. Department of Geography, University of Alcalá, Spain. Version 1. Available online at: http://www…
C2_12_22	Chuvieco	AraIBE15	Aragon	Spain	41.2554	-1.29915		2001-09-20	2001	11	Shrubland	51.6307	1	0.0512864	0.0900374	0.104101	0.194783	Ulex parviflorus			Chuvieco, E., Yebra, M., Jurdao, S., Aguado, I., Salas, F. J., García, M., Nieto, H., De Santis, A., Cocero, D., Riaño, D., Martínez, S., Zapico, E., Recondo, C., Martínez-Vega, J., Martín, M.P., Riva, J., Pérez, F. y Rodríguez-Silva, F. (2011): Field Fuel Moisture Measurements on Spanish study sites. Department of Geography, University of Alcalá, Spain. Version 1. Available online at: http://www…
C2_12_23	Chuvieco	AraIBE15	Aragon	Spain	41.2554	-1.29915		2002-04-08	2002	11	Shrubland	49.3478	1	0.0512864	0.0900374	0.104101	0.194783	Thymus vulgaris			Chuvieco, E., Yebra, M., Jurdao, S., Aguado, I., Salas, F. J., García, M., Nieto, H., De Santis, A., Cocero, D., Riaño, D., Martínez, S., Zapico, E., Recondo, C., Martínez-Vega, J., Martín, M.P., Riva, J., Pérez, F. y Rodríguez-Silva, F. (2011): Field Fuel Moisture Measurements on Spanish study sites. Department of Geography, University of Alcalá, Spain. Version 1. Available online at: http://www…
C2_12_24	Chuvieco	AraIBE15	Aragon	Spain	41.2554	-1.29915		2002-04-08	2002	11	Shrubland	39.4562	1	0.0512864	0.0900374	0.104101	0.194783	Ulex parviflorus			Chuvieco, E., Yebra, M., Jurdao, S., Aguado, I., Salas, F. J., García, M., Nieto, H., De Santis, A., Cocero, D., Riaño, D., Martínez, S., Zapico, E., Recondo, C., Martínez-Vega, J., Martín, M.P., Riva, J., Pérez, F. y Rodríguez-Silva, F. (2011): Field Fuel Moisture Measurements on Spanish study sites. Department of Geography, University of Alcalá, Spain. Version 1. Available online at: http://www…
C2_12_25	Chuvieco	AraIBE15	Aragon	Spain	41.2554	-1.29915		2002-04-24	2002	11	Shrubland	104.345	1	0.0512864	0.0900374	0.104101	0.194783	Thymus vulgaris			Chuvieco, E., Yebra, M., Jurdao, S., Aguado, I., Salas, F. J., García, M., Nieto, H., De Santis, A., Cocero, D., Riaño, D., Martínez, S., Zapico, E., Recondo, C., Martínez-Vega, J., Martín, M.P., Riva, J., Pérez, F. y Rodríguez-Silva, F. (2011): Field Fuel Moisture Measurements on Spanish study sites. Department of Geography, University of Alcalá, Spain. Version 1. Available online at: http://www…
C2_12_26	Chuvieco	AraIBE15	Aragon	Spain	41.2554	-1.29915		2002-04-24	2002	11	Shrubland	49.7173	1	0.0512864	0.0900374	0.104101	0.194783	Ulex parviflorus			Chuvieco, E., Yebra, M., Jurdao, S., Aguado, I., Salas, F. J., García, M., Nieto, H., De Santis, A., Cocero, D., Riaño, D., Martínez, S., Zapico, E., Recondo, C., Martínez-Vega, J., Martín, M.P., Riva, J., Pérez, F. y Rodríguez-Silva, F. (2011): Field Fuel Moisture Measurements on Spanish study sites. Department of Geography, University of Alcalá, Spain. Version 1. Available online at: http://www…
C2_12_27	Chuvieco	AraIBE15	Aragon	Spain	41.2554	-1.29915		2002-05-26	2002	11	Shrubland	121.559	1	0.0512864	0.0900374	0.104101	0.194783	Thymus vulgaris			Chuvieco, E., Yebra, M., Jurdao, S., Aguado, I., Salas, F. J., García, M., Nieto, H., De Santis, A., Cocero, D., Riaño, D., Martínez, S., Zapico, E., Recondo, C., Martínez-Vega, J., Martín, M.P., Riva, J., Pérez, F. y Rodríguez-Silva, F. (2011): Field Fuel Moisture Measurements on Spanish study sites. Department of Geography, University of Alcalá, Spain. Version 1. Available online at: http://www…
C2_12_28	Chuvieco	AraIBE15	Aragon	Spain	41.2554	-1.29915		2002-05-26	2002	11	Shrubland	62.0756	1	0.0512864	0.0900374	0.104101	0.194783	Ulex parviflorus			Chuvieco, E., Yebra, M., Jurdao, S., Aguado, I., Salas, F. J., García, M., Nieto, H., De Santis, A., Cocero, D., Riaño, D., Martínez, S., Zapico, E., Recondo, C., Martínez-Vega, J., Martín, M.P., Riva, J., Pérez, F. y Rodríguez-Silva, F. (2011): Field Fuel Moisture Measurements on Spanish study sites. Department of Geography, University of Alcalá, Spain. Version 1. Available online at: http://www…
C2_12_29	Chuvieco	AraIBE15	Aragon	Spain	41.2554	-1.29915		2002-06-11	2002	11	Shrubland	137.841	1	0.0512864	0.0900374	0.104101	0.194783	Thymus vulgaris			Chuvieco, E., Yebra, M., Jurdao, S., Aguado, I., Salas, F. J., García, M., Nieto, H., De Santis, A., Cocero, D., Riaño, D., Martínez, S., Zapico, E., Recondo, C., Martínez-Vega, J., Martín, M.P., Riva, J., Pérez, F. y Rodríguez-Silva, F. (2011): Field Fuel Moisture Measurements on Spanish study sites. Department of Geography, University of Alcalá, Spain. Version 1. Available online at: http://www…
C2_12_30	Chuvieco	AraIBE15	Aragon	Spain	41.2554	-1.29915		2002-06-11	2002	11	Shrubland	99.9471	1	0.0512864	0.0900374	0.104101	0.194783	Ulex parviflorus			Chuvieco, E., Yebra, M., Jurdao, S., Aguado, I., Salas, F. J., García, M., Nieto, H., De Santis, A., Cocero, D., Riaño, D., Martínez, S., Zapico, E., Recondo, C., Martínez-Vega, J., Martín, M.P., Riva, J., Pérez, F. y Rodríguez-Silva, F. (2011): Field Fuel Moisture Measurements on Spanish study sites. Department of Geography, University of Alcalá, Spain. Version 1. Available online at: http://www…
C2_12_31	Chuvieco	AraIBE15	Aragon	Spain	41.2554	-1.29915		2002-06-27	2002	11	Shrubland	57.783	1	0.0512864	0.0900374	0.104101	0.194783	Thymus vulgaris			Chuvieco, E., Yebra, M., Jurdao, S., Aguado, I., Salas, F. J., García, M., Nieto, H., De Santis, A., Cocero, D., Riaño, D., Martínez, S., Zapico, E., Recondo, C., Martínez-Vega, J., Martín, M.P., Riva, J., Pérez, F. y Rodríguez-Silva, F. (2011): Field Fuel Moisture Measurements on Spanish study sites. Department of Geography, University of Alcalá, Spain. Version 1. Available online at: http://www…
C2_12_32	Chuvieco	AraIBE15	Aragon	Spain	41.2554	-1.29915		2002-06-27	2002	11	Shrubland	83.0537	1	0.0512864	0.0900374	0.104101	0.194783	Ulex parviflorus			Chuvieco, E., Yebra, M., Jurdao, S., Aguado, I., Salas, F. J., García, M., Nieto, H., De Santis, A., Cocero, D., Riaño, D., Martínez, S., Zapico, E., Recondo, C., Martínez-Vega, J., Martín, M.P., Riva, J., Pérez, F. y Rodríguez-Silva, F. (2011): Field Fuel Moisture Measurements on Spanish study sites. Department of Geography, University of Alcalá, Spain. Version 1. Available online at: http://www…
C2_12_33	Chuvieco	AraIBE15	Aragon	Spain	41.2554	-1.29915		2002-07-13	2002	11	Shrubland	44.3062	1	0.0512864	0.0900374	0.104101	0.194783	Thymus vulgaris			Chuvieco, E., Yebra, M., Jurdao, S., Aguado, I., Salas, F. J., García, M., Nieto, H., De Santis, A., Cocero, D., Riaño, D., Martínez, S., Zapico, E., Recondo, C., Martínez-Vega, J., Martín, M.P., Riva, J., Pérez, F. y Rodríguez-Silva, F. (2011): Field Fuel Moisture Measurements on Spanish study sites. Department of Geography, University of Alcalá, Spain. Version 1. Available online at: http://www…
C2_12_34	Chuvieco	AraIBE15	Aragon	Spain	41.2554	-1.29915		2002-07-13	2002	11	Shrubland	74.9546	1	0.0512864	0.0900374	0.104101	0.194783	Ulex parviflorus			Chuvieco, E., Yebra, M., Jurdao, S., Aguado, I., Salas, F. J., García, M., Nieto, H., De Santis, A., Cocero, D., Riaño, D., Martínez, S., Zapico, E., Recondo, C., Martínez-Vega, J., Martín, M.P., Riva, J., Pérez, F. y Rodríguez-Silva, F. (2011): Field Fuel Moisture Measurements on Spanish study sites. Department of Geography, University of Alcalá, Spain. Version 1. Available online at: http://www…
C2_12_35	Chuvieco	AraIBE15	Aragon	Spain	41.2554	-1.29915		2002-07-29	2002	11	Shrubland	43.3515	1	0.0512864	0.0900374	0.104101	0.194783	Thymus vulgaris			Chuvieco, E., Yebra, M., Jurdao, S., Aguado, I., Salas, F. J., García, M., Nieto, H., De Santis, A., Cocero, D., Riaño, D., Martínez, S., Zapico, E., Recondo, C., Martínez-Vega, J., Martín, M.P., Riva, J., Pérez, F. y Rodríguez-Silva, F. (2011): Field Fuel Moisture Measurements on Spanish study sites. Department of Geography, University of Alcalá, Spain. Version 1. Available online at: http://www…
C2_12_36	Chuvieco	AraIBE15	Aragon	Spain	41.2554	-1.29915		2002-07-29	2002	11	Shrubland	66.8394	1	0.0512864	0.0900374	0.104101	0.194783	Ulex parviflorus			Chuvieco, E., Yebra, M., Jurdao, S., Aguado, I., Salas, F. J., García, M., Nieto, H., De Santis, A., Cocero, D., Riaño, D., Martínez, S., Zapico, E., Recondo, C., Martínez-Vega, J., Martín, M.P., Riva, J., Pérez, F. y Rodríguez-Silva, F. (2011): Field Fuel Moisture Measurements on Spanish study sites. Department of Geography, University of Alcalá, Spain. Version 1. Available online at: http://www…
C2_12_37	Chuvieco	AraIBE15	Aragon	Spain	41.2554	-1.29915		2002-08-30	2002	11	Shrubland	83.3125	1	0.0512864	0.0900374	0.104101	0.194783	Thymus vulgaris			Chuvieco, E., Yebra, M., Jurdao, S., Aguado, I., Salas, F. J., García, M., Nieto, H., De Santis, A., Cocero, D., Riaño, D., Martínez, S., Zapico, E., Recondo, C., Martínez-Vega, J., Martín, M.P., Riva, J., Pérez, F. y Rodríguez-Silva, F. (2011): Field Fuel Moisture Measurements on Spanish study sites. Department of Geography, University of Alcalá, Spain. Version 1. Available online at: http://www…
C2_12_38	Chuvieco	AraIBE15	Aragon	Spain	41.2554	-1.29915		2002-08-30	2002	11	Shrubland	71.5342	1	0.0512864	0.0900374	0.104101	0.194783	Ulex parviflorus			Chuvieco, E., Yebra, M., Jurdao, S., Aguado, I., Salas, F. J., García, M., Nieto, H., De Santis, A., Cocero, D., Riaño, D., Martínez, S., Zapico, E., Recondo, C., Martínez-Vega, J., Martín, M.P., Riva, J., Pérez, F. y Rodríguez-Silva, F. (2011): Field Fuel Moisture Measurements on Spanish study sites. Department of Geography, University of Alcalá, Spain. Version 1. Available online at: http://www…
C2_12_39	Chuvieco	AraIBE15	Aragon	Spain	41.2554	-1.29915		2002-09-15	2002	11	Shrubland	60.5187	1	0.0512864	0.0900374	0.104101	0.194783	Thymus vulgaris			Chuvieco, E., Yebra, M., Jurdao, S., Aguado, I., Salas, F. J., García, M., Nieto, H., De Santis, A., Cocero, D., Riaño, D., Martínez, S., Zapico, E., Recondo, C., Martínez-Vega, J., Martín, M.P., Riva, J., Pérez, F. y Rodríguez-Silva, F. (2011): Field Fuel Moisture Measurements on Spanish study sites. Department of Geography, University of Alcalá, Spain. Version 1. Available online at: http://www…
C2_12_40	Chuvieco	AraIBE15	Aragon	Spain	41.2554	-1.29915		2002-09-15	2002	11	Shrubland	61.4553	1	0.0512864	0.0900374	0.104101	0.194783	Ulex parviflorus			Chuvieco, E., Yebra, M., Jurdao, S., Aguado, I., Salas, F. J., García, M., Nieto, H., De Santis, A., Cocero, D., Riaño, D., Martínez, S., Zapico, E., Recondo, C., Martínez-Vega, J., Martín, M.P., Riva, J., Pérez, F. y Rodríguez-Silva, F. (2011): Field Fuel Moisture Measurements on Spanish study sites. Department of Geography, University of Alcalá, Spain. Version 1. Available online at: http://www…
C2_13_1	Chuvieco	AraIBE16	Aragon	Spain	41.3114	-1.44105		2001-04-12	2001	11	Tree cover, needleleaved, evergreen, closed to open (>15%)	89.333	1	0.0529517	0.0757934	0.0717054	0.104551	Pinus pinaster			Chuvieco, E., Yebra, M., Jurdao, S., Aguado, I., Salas, F. J., García, M., Nieto, H., De Santis, A., Cocero, D., Riaño, D., Martínez, S., Zapico, E., Recondo, C., Martínez-Vega, J., Martín, M.P., Riva, J., Pérez, F. y Rodríguez-Silva, F. (2011): Field Fuel Moisture Measurements on Spanish study sites. Department of Geography, University of Alcalá, Spain. Version 1. Available online at: http://www…
C2_13_2	Chuvieco	AraIBE16	Aragon	Spain	41.3114	-1.44105		2001-04-29	2001	11	Tree cover, needleleaved, evergreen, closed to open (>15%)	83.8634	1	0.0529517	0.0757934	0.0717054	0.104551	Pinus pinaster			Chuvieco, E., Yebra, M., Jurdao, S., Aguado, I., Salas, F. J., García, M., Nieto, H., De Santis, A., Cocero, D., Riaño, D., Martínez, S., Zapico, E., Recondo, C., Martínez-Vega, J., Martín, M.P., Riva, J., Pérez, F. y Rodríguez-Silva, F. (2011): Field Fuel Moisture Measurements on Spanish study sites. Department of Geography, University of Alcalá, Spain. Version 1. Available online at: http://www…
C2_13_3	Chuvieco	AraIBE16	Aragon	Spain	41.3114	-1.44105		2001-05-15	2001	11	Tree cover, needleleaved, evergreen, closed to open (>15%)	82.477	1	0.0529517	0.0757934	0.0717054	0.104551	Pinus pinaster			Chuvieco, E., Yebra, M., Jurdao, S., Aguado, I., Salas, F. J., García, M., Nieto, H., De Santis, A., Cocero, D., Riaño, D., Martínez, S., Zapico, E., Recondo, C., Martínez-Vega, J., Martín, M.P., Riva, J., Pérez, F. y Rodríguez-Silva, F. (2011): Field Fuel Moisture Measurements on Spanish study sites. Department of Geography, University of Alcalá, Spain. Version 1. Available online at: http://www…
C2_13_4	Chuvieco	AraIBE16	Aragon	Spain	41.3114	-1.44105		2001-05-31	2001	11	Tree cover, needleleaved, evergreen, closed to open (>15%)	98.8811	1	0.0529517	0.0757934	0.0717054	0.104551	Pinus pinaster			Chuvieco, E., Yebra, M., Jurdao, S., Aguado, I., Salas, F. J., García, M., Nieto, H., De Santis, A., Cocero, D., Riaño, D., Martínez, S., Zapico, E., Recondo, C., Martínez-Vega, J., Martín, M.P., Riva, J., Pérez, F. y Rodríguez-Silva, F. (2011): Field Fuel Moisture Measurements on Spanish study sites. Department of Geography, University of Alcalá, Spain. Version 1. Available online at: http://www…
C2_13_5	Chuvieco	AraIBE16	Aragon	Spain	41.3114	-1.44105		2001-06-16	2001	11	Tree cover, needleleaved, evergreen, closed to open (>15%)	80.6445	1	0.0529517	0.0757934	0.0717054	0.104551	Pinus pinaster			Chuvieco, E., Yebra, M., Jurdao, S., Aguado, I., Salas, F. J., García, M., Nieto, H., De Santis, A., Cocero, D., Riaño, D., Martínez, S., Zapico, E., Recondo, C., Martínez-Vega, J., Martín, M.P., Riva, J., Pérez, F. y Rodríguez-Silva, F. (2011): Field Fuel Moisture Measurements on Spanish study sites. Department of Geography, University of Alcalá, Spain. Version 1. Available online at: http://www…
C2_13_6	Chuvieco	AraIBE16	Aragon	Spain	41.3114	-1.44105		2001-07-02	2001	11	Tree cover, needleleaved, evergreen, closed to open (>15%)	105.624	1	0.0529517	0.0757934	0.0717054	0.104551	Pinus pinaster			Chuvieco, E., Yebra, M., Jurdao, S., Aguado, I., Salas, F. J., García, M., Nieto, H., De Santis, A., Cocero, D., Riaño, D., Martínez, S., Zapico, E., Recondo, C., Martínez-Vega, J., Martín, M.P., Riva, J., Pérez, F. y Rodríguez-Silva, F. (2011): Field Fuel Moisture Measurements on Spanish study sites. Department of Geography, University of Alcalá, Spain. Version 1. Available online at: http://www…
C2_13_7	Chuvieco	AraIBE16	Aragon	Spain	41.3114	-1.44105		2001-07-18	2001	11	Tree cover, needleleaved, evergreen, closed to open (>15%)	125.461	1	0.0529517	0.0757934	0.0717054	0.104551	Pinus pinaster			Chuvieco, E., Yebra, M., Jurdao, S., Aguado, I., Salas, F. J., García, M., Nieto, H., De Santis, A., Cocero, D., Riaño, D., Martínez, S., Zapico, E., Recondo, C., Martínez-Vega, J., Martín, M.P., Riva, J., Pérez, F. y Rodríguez-Silva, F. (2011): Field Fuel Moisture Measurements on Spanish study sites. Department of Geography, University of Alcalá, Spain. Version 1. Available online at: http://www…
C2_13_8	Chuvieco	AraIBE16	Aragon	Spain	41.3114	-1.44105		2001-08-03	2001	11	Tree cover, needleleaved, evergreen, closed to open (>15%)	58.8956	1	0.0529517	0.0757934	0.0717054	0.104551	Pinus pinaster			Chuvieco, E., Yebra, M., Jurdao, S., Aguado, I., Salas, F. J., García, M., Nieto, H., De Santis, A., Cocero, D., Riaño, D., Martínez, S., Zapico, E., Recondo, C., Martínez-Vega, J., Martín, M.P., Riva, J., Pérez, F. y Rodríguez-Silva, F. (2011): Field Fuel Moisture Measurements on Spanish study sites. Department of Geography, University of Alcalá, Spain. Version 1. Available online at: http://www…
C2_13_9	Chuvieco	AraIBE16	Aragon	Spain	41.3114	-1.44105		2001-08-19	2001	11	Tree cover, needleleaved, evergreen, closed to open (>15%)	114.507	1	0.0529517	0.0757934	0.0717054	0.104551	Pinus pinaster			Chuvieco, E., Yebra, M., Jurdao, S., Aguado, I., Salas, F. J., García, M., Nieto, H., De Santis, A., Cocero, D., Riaño, D., Martínez, S., Zapico, E., Recondo, C., Martínez-Vega, J., Martín, M.P., Riva, J., Pérez, F. y Rodríguez-Silva, F. (2011): Field Fuel Moisture Measurements on Spanish study sites. Department of Geography, University of Alcalá, Spain. Version 1. Available online at: http://www…
C2_13_10	Chuvieco	AraIBE16	Aragon	Spain	41.3114	-1.44105		2001-09-04	2001	11	Tree cover, needleleaved, evergreen, closed to open (>15%)	100.835	1	0.0529517	0.0757934	0.0717054	0.104551	Pinus pinaster			Chuvieco, E., Yebra, M., Jurdao, S., Aguado, I., Salas, F. J., García, M., Nieto, H., De Santis, A., Cocero, D., Riaño, D., Martínez, S., Zapico, E., Recondo, C., Martínez-Vega, J., Martín, M.P., Riva, J., Pérez, F. y Rodríguez-Silva, F. (2011): Field Fuel Moisture Measurements on Spanish study sites. Department of Geography, University of Alcalá, Spain. Version 1. Available online at: http://www…
C2_13_11	Chuvieco	AraIBE16	Aragon	Spain	41.3114	-1.44105		2001-09-20	2001	11	Tree cover, needleleaved, evergreen, closed to open (>15%)	101.787	1	0.0529517	0.0757934	0.0717054	0.104551	Pinus pinaster			Chuvieco, E., Yebra, M., Jurdao, S., Aguado, I., Salas, F. J., García, M., Nieto, H., De Santis, A., Cocero, D., Riaño, D., Martínez, S., Zapico, E., Recondo, C., Martínez-Vega, J., Martín, M.P., Riva, J., Pérez, F. y Rodríguez-Silva, F. (2011): Field Fuel Moisture Measurements on Spanish study sites. Department of Geography, University of Alcalá, Spain. Version 1. Available online at: http://www…
C2_13_12	Chuvieco	AraIBE16	Aragon	Spain	41.3114	-1.44105		2002-04-08	2002	11	Tree cover, needleleaved, evergreen, closed to open (>15%)	65.153	1	0.0529517	0.0757934	0.0717054	0.104551	Pinus pinaster			Chuvieco, E., Yebra, M., Jurdao, S., Aguado, I., Salas, F. J., García, M., Nieto, H., De Santis, A., Cocero, D., Riaño, D., Martínez, S., Zapico, E., Recondo, C., Martínez-Vega, J., Martín, M.P., Riva, J., Pérez, F. y Rodríguez-Silva, F. (2011): Field Fuel Moisture Measurements on Spanish study sites. Department of Geography, University of Alcalá, Spain. Version 1. Available online at: http://www…
C2_13_13	Chuvieco	AraIBE16	Aragon	Spain	41.3114	-1.44105		2002-04-24	2002	11	Tree cover, needleleaved, evergreen, closed to open (>15%)	89.8586	1	0.0529517	0.0757934	0.0717054	0.104551	Pinus pinaster			Chuvieco, E., Yebra, M., Jurdao, S., Aguado, I., Salas, F. J., García, M., Nieto, H., De Santis, A., Cocero, D., Riaño, D., Martínez, S., Zapico, E., Recondo, C., Martínez-Vega, J., Martín, M.P., Riva, J., Pérez, F. y Rodríguez-Silva, F. (2011): Field Fuel Moisture Measurements on Spanish study sites. Department of Geography, University of Alcalá, Spain. Version 1. Available online at: http://www…
C2_13_14	Chuvieco	AraIBE16	Aragon	Spain	41.3114	-1.44105		2002-05-26	2002	11	Tree cover, needleleaved, evergreen, closed to open (>15%)	104.139	1	0.0529517	0.0757934	0.0717054	0.104551	Pinus pinaster			Chuvieco, E., Yebra, M., Jurdao, S., Aguado, I., Salas, F. J., García, M., Nieto, H., De Santis, A., Cocero, D., Riaño, D., Martínez, S., Zapico, E., Recondo, C., Martínez-Vega, J., Martín, M.P., Riva, J., Pérez, F. y Rodríguez-Silva, F. (2011): Field Fuel Moisture Measurements on Spanish study sites. Department of Geography, University of Alcalá, Spain. Version 1. Available online at: http://www…
C2_13_15	Chuvieco	AraIBE16	Aragon	Spain	41.3114	-1.44105		2002-06-11	2002	11	Tree cover, needleleaved, evergreen, closed to open (>15%)	88.5179	1	0.0529517	0.0757934	0.0717054	0.104551	Pinus pinaster			Chuvieco, E., Yebra, M., Jurdao, S., Aguado, I., Salas, F. J., García, M., Nieto, H., De Santis, A., Cocero, D., Riaño, D., Martínez, S., Zapico, E., Recondo, C., Martínez-Vega, J., Martín, M.P., Riva, J., Pérez, F. y Rodríguez-Silva, F. (2011): Field Fuel Moisture Measurements on Spanish study sites. Department of Geography, University of Alcalá, Spain. Version 1. Available online at: http://www…
C2_13_16	Chuvieco	AraIBE16	Aragon	Spain	41.3114	-1.44105		2002-06-27	2002	11	Tree cover, needleleaved, evergreen, closed to open (>15%)	68.1617	1	0.0529517	0.0757934	0.0717054	0.104551	Pinus pinaster			Chuvieco, E., Yebra, M., Jurdao, S., Aguado, I., Salas, F. J., García, M., Nieto, H., De Santis, A., Cocero, D., Riaño, D., Martínez, S., Zapico, E., Recondo, C., Martínez-Vega, J., Martín, M.P., Riva, J., Pérez, F. y Rodríguez-Silva, F. (2011): Field Fuel Moisture Measurements on Spanish study sites. Department of Geography, University of Alcalá, Spain. Version 1. Available online at: http://www…
C2_13_17	Chuvieco	AraIBE16	Aragon	Spain	41.3114	-1.44105		2002-07-13	2002	11	Tree cover, needleleaved, evergreen, closed to open (>15%)	125.101	1	0.0529517	0.0757934	0.0717054	0.104551	Pinus pinaster			Chuvieco, E., Yebra, M., Jurdao, S., Aguado, I., Salas, F. J., García, M., Nieto, H., De Santis, A., Cocero, D., Riaño, D., Martínez, S., Zapico, E., Recondo, C., Martínez-Vega, J., Martín, M.P., Riva, J., Pérez, F. y Rodríguez-Silva, F. (2011): Field Fuel Moisture Measurements on Spanish study sites. Department of Geography, University of Alcalá, Spain. Version 1. Available online at: http://www…
C2_13_18	Chuvieco	AraIBE16	Aragon	Spain	41.3114	-1.44105		2002-07-29	2002	11	Tree cover, needleleaved, evergreen, closed to open (>15%)	106.634	1	0.0529517	0.0757934	0.0717054	0.104551	Pinus pinaster			Chuvieco, E., Yebra, M., Jurdao, S., Aguado, I., Salas, F. J., García, M., Nieto, H., De Santis, A., Cocero, D., Riaño, D., Martínez, S., Zapico, E., Recondo, C., Martínez-Vega, J., Martín, M.P., Riva, J., Pérez, F. y Rodríguez-Silva, F. (2011): Field Fuel Moisture Measurements on Spanish study sites. Department of Geography, University of Alcalá, Spain. Version 1. Available online at: http://www…
C2_13_19	Chuvieco	AraIBE16	Aragon	Spain	41.3114	-1.44105		2002-08-30	2002	11	Tree cover, needleleaved, evergreen, closed to open (>15%)	110.442	1	0.0529517	0.0757934	0.0717054	0.104551	Pinus pinaster			Chuvieco, E., Yebra, M., Jurdao, S., Aguado, I., Salas, F. J., García, M., Nieto, H., De Santis, A., Cocero, D., Riaño, D., Martínez, S., Zapico, E., Recondo, C., Martínez-Vega, J., Martín, M.P., Riva, J., Pérez, F. y Rodríguez-Silva, F. (2011): Field Fuel Moisture Measurements on Spanish study sites. Department of Geography, University of Alcalá, Spain. Version 1. Available online at: http://www…
C2_13_20	Chuvieco	AraIBE16	Aragon	Spain	41.3114	-1.44105		2002-09-15	2002	11	Tree cover, needleleaved, evergreen, closed to open (>15%)	104.857	1	0.0529517	0.0757934	0.0717054	0.104551	Pinus pinaster			Chuvieco, E., Yebra, M., Jurdao, S., Aguado, I., Salas, F. J., García, M., Nieto, H., De Santis, A., Cocero, D., Riaño, D., Martínez, S., Zapico, E., Recondo, C., Martínez-Vega, J., Martín, M.P., Riva, J., Pérez, F. y Rodríguez-Silva, F. (2011): Field Fuel Moisture Measurements on Spanish study sites. Department of Geography, University of Alcalá, Spain. Version 1. Available online at: http://www…
C2_14_1	Chuvieco	AraPRE17	Aragon	Spain	42.2458	-0.339557		2001-03-27	2001	11	Tree cover, needleleaved, evergreen, closed to open (>15%)	71.4103	1	0.0635761	0.0811713	0.101062	0.133849	Quercus coccifera			Chuvieco, E., Yebra, M., Jurdao, S., Aguado, I., Salas, F. J., García, M., Nieto, H., De Santis, A., Cocero, D., Riaño, D., Martínez, S., Zapico, E., Recondo, C., Martínez-Vega, J., Martín, M.P., Riva, J., Pérez, F. y Rodríguez-Silva, F. (2011): Field Fuel Moisture Measurements on Spanish study sites. Department of Geography, University of Alcalá, Spain. Version 1. Available online at: http://www…
C2_14_2	Chuvieco	AraPRE17	Aragon	Spain	42.2458	-0.339557		2001-03-27	2001	11	Tree cover, needleleaved, evergreen, closed to open (>15%)	87.8793	1	0.0635761	0.0811713	0.101062	0.133849	Juniperus communis			Chuvieco, E., Yebra, M., Jurdao, S., Aguado, I., Salas, F. J., García, M., Nieto, H., De Santis, A., Cocero, D., Riaño, D., Martínez, S., Zapico, E., Recondo, C., Martínez-Vega, J., Martín, M.P., Riva, J., Pérez, F. y Rodríguez-Silva, F. (2011): Field Fuel Moisture Measurements on Spanish study sites. Department of Geography, University of Alcalá, Spain. Version 1. Available online at: http://www…
C2_14_3	Chuvieco	AraPRE17	Aragon	Spain	42.2458	-0.339557		2001-03-27	2001	11	Tree cover, needleleaved, evergreen, closed to open (>15%)	156.995	1	0.0635761	0.0811713	0.101062	0.133849	Rosmarinus officinalis			Chuvieco, E., Yebra, M., Jurdao, S., Aguado, I., Salas, F. J., García, M., Nieto, H., De Santis, A., Cocero, D., Riaño, D., Martínez, S., Zapico, E., Recondo, C., Martínez-Vega, J., Martín, M.P., Riva, J., Pérez, F. y Rodríguez-Silva, F. (2011): Field Fuel Moisture Measurements on Spanish study sites. Department of Geography, University of Alcalá, Spain. Version 1. Available online at: http://www…
C2_14_4	Chuvieco	AraPRE17	Aragon	Spain	42.2458	-0.339557		2001-04-05	2001	11	Tree cover, needleleaved, evergreen, closed to open (>15%)	66.2384	1	0.0635761	0.0811713	0.101062	0.133849	Quercus coccifera			Chuvieco, E., Yebra, M., Jurdao, S., Aguado, I., Salas, F. J., García, M., Nieto, H., De Santis, A., Cocero, D., Riaño, D., Martínez, S., Zapico, E., Recondo, C., Martínez-Vega, J., Martín, M.P., Riva, J., Pérez, F. y Rodríguez-Silva, F. (2011): Field Fuel Moisture Measurements on Spanish study sites. Department of Geography, University of Alcalá, Spain. Version 1. Available online at: http://www…
C2_14_5	Chuvieco	AraPRE17	Aragon	Spain	42.2458	-0.339557		2001-04-05	2001	11	Tree cover, needleleaved, evergreen, closed to open (>15%)	82.1286	1	0.0635761	0.0811713	0.101062	0.133849	Juniperus communis			Chuvieco, E., Yebra, M., Jurdao, S., Aguado, I., Salas, F. J., García, M., Nieto, H., De Santis, A., Cocero, D., Riaño, D., Martínez, S., Zapico, E., Recondo, C., Martínez-Vega, J., Martín, M.P., Riva, J., Pérez, F. y Rodríguez-Silva, F. (2011): Field Fuel Moisture Measurements on Spanish study sites. Department of Geography, University of Alcalá, Spain. Version 1. Available online at: http://www…
C2_14_6	Chuvieco	AraPRE17	Aragon	Spain	42.2458	-0.339557		2001-04-05	2001	11	Tree cover, needleleaved, evergreen, closed to open (>15%)	130.354	1	0.0635761	0.0811713	0.101062	0.133849	Rosmarinus officinalis			Chuvieco, E., Yebra, M., Jurdao, S., Aguado, I., Salas, F. J., García, M., Nieto, H., De Santis, A., Cocero, D., Riaño, D., Martínez, S., Zapico, E., Recondo, C., Martínez-Vega, J., Martín, M.P., Riva, J., Pérez, F. y Rodríguez-Silva, F. (2011): Field Fuel Moisture Measurements on Spanish study sites. Department of Geography, University of Alcalá, Spain. Version 1. Available online at: http://www…
C2_14_7	Chuvieco	AraPRE17	Aragon	Spain	42.2458	-0.339557		2001-04-21	2001	11	Tree cover, needleleaved, evergreen, closed to open (>15%)	90.4243	1	0.0635761	0.0811713	0.101062	0.133849	Genista scorpious			Chuvieco, E., Yebra, M., Jurdao, S., Aguado, I., Salas, F. J., García, M., Nieto, H., De Santis, A., Cocero, D., Riaño, D., Martínez, S., Zapico, E., Recondo, C., Martínez-Vega, J., Martín, M.P., Riva, J., Pérez, F. y Rodríguez-Silva, F. (2011): Field Fuel Moisture Measurements on Spanish study sites. Department of Geography, University of Alcalá, Spain. Version 1. Available online at: http://www…
C2_14_8	Chuvieco	AraPRE17	Aragon	Spain	42.2458	-0.339557		2001-04-21	2001	11	Tree cover, needleleaved, evergreen, closed to open (>15%)	76.1459	1	0.0635761	0.0811713	0.101062	0.133849	Quercus coccifera			Chuvieco, E., Yebra, M., Jurdao, S., Aguado, I., Salas, F. J., García, M., Nieto, H., De Santis, A., Cocero, D., Riaño, D., Martínez, S., Zapico, E., Recondo, C., Martínez-Vega, J., Martín, M.P., Riva, J., Pérez, F. y Rodríguez-Silva, F. (2011): Field Fuel Moisture Measurements on Spanish study sites. Department of Geography, University of Alcalá, Spain. Version 1. Available online at: http://www…
C2_14_9	Chuvieco	AraPRE17	Aragon	Spain	42.2458	-0.339557		2001-04-21	2001	11	Tree cover, needleleaved, evergreen, closed to open (>15%)	91.2521	1	0.0635761	0.0811713	0.101062	0.133849	Juniperus communis			Chuvieco, E., Yebra, M., Jurdao, S., Aguado, I., Salas, F. J., García, M., Nieto, H., De Santis, A., Cocero, D., Riaño, D., Martínez, S., Zapico, E., Recondo, C., Martínez-Vega, J., Martín, M.P., Riva, J., Pérez, F. y Rodríguez-Silva, F. (2011): Field Fuel Moisture Measurements on Spanish study sites. Department of Geography, University of Alcalá, Spain. Version 1. Available online at: http://www…
C2_14_10	Chuvieco	AraPRE17	Aragon	Spain	42.2458	-0.339557		2001-04-21	2001	11	Tree cover, needleleaved, evergreen, closed to open (>15%)	158.965	1	0.0635761	0.0811713	0.101062	0.133849	Rosmarinus officinalis			Chuvieco, E., Yebra, M., Jurdao, S., Aguado, I., Salas, F. J., García, M., Nieto, H., De Santis, A., Cocero, D., Riaño, D., Martínez, S., Zapico, E., Recondo, C., Martínez-Vega, J., Martín, M.P., Riva, J., Pérez, F. y Rodríguez-Silva, F. (2011): Field Fuel Moisture Measurements on Spanish study sites. Department of Geography, University of Alcalá, Spain. Version 1. Available online at: http://www…
C2_14_11	Chuvieco	AraPRE17	Aragon	Spain	42.2458	-0.339557		2001-05-07	2001	11	Tree cover, needleleaved, evergreen, closed to open (>15%)	105.15	1	0.0635761	0.0811713	0.101062	0.133849	Genista scorpious			Chuvieco, E., Yebra, M., Jurdao, S., Aguado, I., Salas, F. J., García, M., Nieto, H., De Santis, A., Cocero, D., Riaño, D., Martínez, S., Zapico, E., Recondo, C., Martínez-Vega, J., Martín, M.P., Riva, J., Pérez, F. y Rodríguez-Silva, F. (2011): Field Fuel Moisture Measurements on Spanish study sites. Department of Geography, University of Alcalá, Spain. Version 1. Available online at: http://www…
C2_14_12	Chuvieco	AraPRE17	Aragon	Spain	42.2458	-0.339557		2001-05-07	2001	11	Tree cover, needleleaved, evergreen, closed to open (>15%)	108.642	1	0.0635761	0.0811713	0.101062	0.133849	Quercus coccifera			Chuvieco, E., Yebra, M., Jurdao, S., Aguado, I., Salas, F. J., García, M., Nieto, H., De Santis, A., Cocero, D., Riaño, D., Martínez, S., Zapico, E., Recondo, C., Martínez-Vega, J., Martín, M.P., Riva, J., Pérez, F. y Rodríguez-Silva, F. (2011): Field Fuel Moisture Measurements on Spanish study sites. Department of Geography, University of Alcalá, Spain. Version 1. Available online at: http://www…
C2_14_13	Chuvieco	AraPRE17	Aragon	Spain	42.2458	-0.339557		2001-05-07	2001	11	Tree cover, needleleaved, evergreen, closed to open (>15%)	129.182	1	0.0635761	0.0811713	0.101062	0.133849	Juniperus communis			Chuvieco, E., Yebra, M., Jurdao, S., Aguado, I., Salas, F. J., García, M., Nieto, H., De Santis, A., Cocero, D., Riaño, D., Martínez, S., Zapico, E., Recondo, C., Martínez-Vega, J., Martín, M.P., Riva, J., Pérez, F. y Rodríguez-Silva, F. (2011): Field Fuel Moisture Measurements on Spanish study sites. Department of Geography, University of Alcalá, Spain. Version 1. Available online at: http://www…
C2_14_14	Chuvieco	AraPRE17	Aragon	Spain	42.2458	-0.339557		2001-05-07	2001	11	Tree cover, needleleaved, evergreen, closed to open (>15%)	138.108	1	0.0635761	0.0811713	0.101062	0.133849	Rosmarinus officinalis			Chuvieco, E., Yebra, M., Jurdao, S., Aguado, I., Salas, F. J., García, M., Nieto, H., De Santis, A., Cocero, D., Riaño, D., Martínez, S., Zapico, E., Recondo, C., Martínez-Vega, J., Martín, M.P., Riva, J., Pérez, F. y Rodríguez-Silva, F. (2011): Field Fuel Moisture Measurements on Spanish study sites. Department of Geography, University of Alcalá, Spain. Version 1. Available online at: http://www…
C2_14_15	Chuvieco	AraPRE17	Aragon	Spain	42.2458	-0.339557		2001-05-23	2001	11	Tree cover, needleleaved, evergreen, closed to open (>15%)	111.426	1	0.0635761	0.0811713	0.101062	0.133849	Genista scorpious			Chuvieco, E., Yebra, M., Jurdao, S., Aguado, I., Salas, F. J., García, M., Nieto, H., De Santis, A., Cocero, D., Riaño, D., Martínez, S., Zapico, E., Recondo, C., Martínez-Vega, J., Martín, M.P., Riva, J., Pérez, F. y Rodríguez-Silva, F. (2011): Field Fuel Moisture Measurements on Spanish study sites. Department of Geography, University of Alcalá, Spain. Version 1. Available online at: http://www…
C2_14_16	Chuvieco	AraPRE17	Aragon	Spain	42.2458	-0.339557		2001-05-23	2001	11	Tree cover, needleleaved, evergreen, closed to open (>15%)	128.713	1	0.0635761	0.0811713	0.101062	0.133849	Quercus coccifera			Chuvieco, E., Yebra, M., Jurdao, S., Aguado, I., Salas, F. J., García, M., Nieto, H., De Santis, A., Cocero, D., Riaño, D., Martínez, S., Zapico, E., Recondo, C., Martínez-Vega, J., Martín, M.P., Riva, J., Pérez, F. y Rodríguez-Silva, F. (2011): Field Fuel Moisture Measurements on Spanish study sites. Department of Geography, University of Alcalá, Spain. Version 1. Available online at: http://www…
C2_14_17	Chuvieco	AraPRE17	Aragon	Spain	42.2458	-0.339557		2001-05-23	2001	11	Tree cover, needleleaved, evergreen, closed to open (>15%)	111.16	1	0.0635761	0.0811713	0.101062	0.133849	Juniperus communis			Chuvieco, E., Yebra, M., Jurdao, S., Aguado, I., Salas, F. J., García, M., Nieto, H., De Santis, A., Cocero, D., Riaño, D., Martínez, S., Zapico, E., Recondo, C., Martínez-Vega, J., Martín, M.P., Riva, J., Pérez, F. y Rodríguez-Silva, F. (2011): Field Fuel Moisture Measurements on Spanish study sites. Department of Geography, University of Alcalá, Spain. Version 1. Available online at: http://www…
C2_14_18	Chuvieco	AraPRE17	Aragon	Spain	42.2458	-0.339557		2001-05-23	2001	11	Tree cover, needleleaved, evergreen, closed to open (>15%)	168.812	1	0.0635761	0.0811713	0.101062	0.133849	Rosmarinus officinalis			Chuvieco, E., Yebra, M., Jurdao, S., Aguado, I., Salas, F. J., García, M., Nieto, H., De Santis, A., Cocero, D., Riaño, D., Martínez, S., Zapico, E., Recondo, C., Martínez-Vega, J., Martín, M.P., Riva, J., Pérez, F. y Rodríguez-Silva, F. (2011): Field Fuel Moisture Measurements on Spanish study sites. Department of Geography, University of Alcalá, Spain. Version 1. Available online at: http://www…
C2_14_19	Chuvieco	AraPRE17	Aragon	Spain	42.2458	-0.339557		2001-06-08	2001	11	Tree cover, needleleaved, evergreen, closed to open (>15%)	88.1871	1	0.0635761	0.0811713	0.101062	0.133849	Genista scorpious			Chuvieco, E., Yebra, M., Jurdao, S., Aguado, I., Salas, F. J., García, M., Nieto, H., De Santis, A., Cocero, D., Riaño, D., Martínez, S., Zapico, E., Recondo, C., Martínez-Vega, J., Martín, M.P., Riva, J., Pérez, F. y Rodríguez-Silva, F. (2011): Field Fuel Moisture Measurements on Spanish study sites. Department of Geography, University of Alcalá, Spain. Version 1. Available online at: http://www…
C2_14_20	Chuvieco	AraPRE17	Aragon	Spain	42.2458	-0.339557		2001-06-08	2001	11	Tree cover, needleleaved, evergreen, closed to open (>15%)	82.7643	1	0.0635761	0.0811713	0.101062	0.133849	Quercus coccifera			Chuvieco, E., Yebra, M., Jurdao, S., Aguado, I., Salas, F. J., García, M., Nieto, H., De Santis, A., Cocero, D., Riaño, D., Martínez, S., Zapico, E., Recondo, C., Martínez-Vega, J., Martín, M.P., Riva, J., Pérez, F. y Rodríguez-Silva, F. (2011): Field Fuel Moisture Measurements on Spanish study sites. Department of Geography, University of Alcalá, Spain. Version 1. Available online at: http://www…
C2_14_21	Chuvieco	AraPRE17	Aragon	Spain	42.2458	-0.339557		2001-06-08	2001	11	Tree cover, needleleaved, evergreen, closed to open (>15%)	85.2482	1	0.0635761	0.0811713	0.101062	0.133849	Juniperus communis			Chuvieco, E., Yebra, M., Jurdao, S., Aguado, I., Salas, F. J., García, M., Nieto, H., De Santis, A., Cocero, D., Riaño, D., Martínez, S., Zapico, E., Recondo, C., Martínez-Vega, J., Martín, M.P., Riva, J., Pérez, F. y Rodríguez-Silva, F. (2011): Field Fuel Moisture Measurements on Spanish study sites. Department of Geography, University of Alcalá, Spain. Version 1. Available online at: http://www…
C2_14_22	Chuvieco	AraPRE17	Aragon	Spain	42.2458	-0.339557		2001-06-08	2001	11	Tree cover, needleleaved, evergreen, closed to open (>15%)	121.777	1	0.0635761	0.0811713	0.101062	0.133849	Rosmarinus officinalis			Chuvieco, E., Yebra, M., Jurdao, S., Aguado, I., Salas, F. J., García, M., Nieto, H., De Santis, A., Cocero, D., Riaño, D., Martínez, S., Zapico, E., Recondo, C., Martínez-Vega, J., Martín, M.P., Riva, J., Pérez, F. y Rodríguez-Silva, F. (2011): Field Fuel Moisture Measurements on Spanish study sites. Department of Geography, University of Alcalá, Spain. Version 1. Available online at: http://www…
C2_14_23	Chuvieco	AraPRE17	Aragon	Spain	42.2458	-0.339557		2001-06-24	2001	11	Tree cover, needleleaved, evergreen, closed to open (>15%)	57.9515	1	0.0635761	0.0811713	0.101062	0.133849	Genista scorpious			Chuvieco, E., Yebra, M., Jurdao, S., Aguado, I., Salas, F. J., García, M., Nieto, H., De Santis, A., Cocero, D., Riaño, D., Martínez, S., Zapico, E., Recondo, C., Martínez-Vega, J., Martín, M.P., Riva, J., Pérez, F. y Rodríguez-Silva, F. (2011): Field Fuel Moisture Measurements on Spanish study sites. Department of Geography, University of Alcalá, Spain. Version 1. Available online at: http://www…
C2_14_24	Chuvieco	AraPRE17	Aragon	Spain	42.2458	-0.339557		2001-06-24	2001	11	Tree cover, needleleaved, evergreen, closed to open (>15%)	67.2103	1	0.0635761	0.0811713	0.101062	0.133849	Quercus coccifera			Chuvieco, E., Yebra, M., Jurdao, S., Aguado, I., Salas, F. J., García, M., Nieto, H., De Santis, A., Cocero, D., Riaño, D., Martínez, S., Zapico, E., Recondo, C., Martínez-Vega, J., Martín, M.P., Riva, J., Pérez, F. y Rodríguez-Silva, F. (2011): Field Fuel Moisture Measurements on Spanish study sites. Department of Geography, University of Alcalá, Spain. Version 1. Available online at: http://www…
C2_14_25	Chuvieco	AraPRE17	Aragon	Spain	42.2458	-0.339557		2001-06-24	2001	11	Tree cover, needleleaved, evergreen, closed to open (>15%)	67.4263	1	0.0635761	0.0811713	0.101062	0.133849	Juniperus communis			Chuvieco, E., Yebra, M., Jurdao, S., Aguado, I., Salas, F. J., García, M., Nieto, H., De Santis, A., Cocero, D., Riaño, D., Martínez, S., Zapico, E., Recondo, C., Martínez-Vega, J., Martín, M.P., Riva, J., Pérez, F. y Rodríguez-Silva, F. (2011): Field Fuel Moisture Measurements on Spanish study sites. Department of Geography, University of Alcalá, Spain. Version 1. Available online at: http://www…
C2_14_26	Chuvieco	AraPRE17	Aragon	Spain	42.2458	-0.339557		2001-06-24	2001	11	Tree cover, needleleaved, evergreen, closed to open (>15%)	88.9554	1	0.0635761	0.0811713	0.101062	0.133849	Rosmarinus officinalis			Chuvieco, E., Yebra, M., Jurdao, S., Aguado, I., Salas, F. J., García, M., Nieto, H., De Santis, A., Cocero, D., Riaño, D., Martínez, S., Zapico, E., Recondo, C., Martínez-Vega, J., Martín, M.P., Riva, J., Pérez, F. y Rodríguez-Silva, F. (2011): Field Fuel Moisture Measurements on Spanish study sites. Department of Geography, University of Alcalá, Spain. Version 1. Available online at: http://www…
C2_14_27	Chuvieco	AraPRE17	Aragon	Spain	42.2458	-0.339557		2001-07-10	2001	11	Tree cover, needleleaved, evergreen, closed to open (>15%)	60.778	1	0.0635761	0.0811713	0.101062	0.133849	Genista scorpious			Chuvieco, E., Yebra, M., Jurdao, S., Aguado, I., Salas, F. J., García, M., Nieto, H., De Santis, A., Cocero, D., Riaño, D., Martínez, S., Zapico, E., Recondo, C., Martínez-Vega, J., Martín, M.P., Riva, J., Pérez, F. y Rodríguez-Silva, F. (2011): Field Fuel Moisture Measurements on Spanish study sites. Department of Geography, University of Alcalá, Spain. Version 1. Available online at: http://www…
C2_14_28	Chuvieco	AraPRE17	Aragon	Spain	42.2458	-0.339557		2001-07-10	2001	11	Tree cover, needleleaved, evergreen, closed to open (>15%)	80.0635	1	0.0635761	0.0811713	0.101062	0.133849	Quercus coccifera			Chuvieco, E., Yebra, M., Jurdao, S., Aguado, I., Salas, F. J., García, M., Nieto, H., De Santis, A., Cocero, D., Riaño, D., Martínez, S., Zapico, E., Recondo, C., Martínez-Vega, J., Martín, M.P., Riva, J., Pérez, F. y Rodríguez-Silva, F. (2011): Field Fuel Moisture Measurements on Spanish study sites. Department of Geography, University of Alcalá, Spain. Version 1. Available online at: http://www…
C2_14_29	Chuvieco	AraPRE17	Aragon	Spain	42.2458	-0.339557		2001-07-10	2001	11	Tree cover, needleleaved, evergreen, closed to open (>15%)	86.2716	1	0.0635761	0.0811713	0.101062	0.133849	Juniperus communis			Chuvieco, E., Yebra, M., Jurdao, S., Aguado, I., Salas, F. J., García, M., Nieto, H., De Santis, A., Cocero, D., Riaño, D., Martínez, S., Zapico, E., Recondo, C., Martínez-Vega, J., Martín, M.P., Riva, J., Pérez, F. y Rodríguez-Silva, F. (2011): Field Fuel Moisture Measurements on Spanish study sites. Department of Geography, University of Alcalá, Spain. Version 1. Available online at: http://www…
C2_14_30	Chuvieco	AraPRE17	Aragon	Spain	42.2458	-0.339557		2001-07-10	2001	11	Tree cover, needleleaved, evergreen, closed to open (>15%)	112.771	1	0.0635761	0.0811713	0.101062	0.133849	Rosmarinus officinalis			Chuvieco, E., Yebra, M., Jurdao, S., Aguado, I., Salas, F. J., García, M., Nieto, H., De Santis, A., Cocero, D., Riaño, D., Martínez, S., Zapico, E., Recondo, C., Martínez-Vega, J., Martín, M.P., Riva, J., Pérez, F. y Rodríguez-Silva, F. (2011): Field Fuel Moisture Measurements on Spanish study sites. Department of Geography, University of Alcalá, Spain. Version 1. Available online at: http://www…
C2_14_31	Chuvieco	AraPRE17	Aragon	Spain	42.2458	-0.339557		2001-07-26	2001	11	Tree cover, needleleaved, evergreen, closed to open (>15%)	55.1925	1	0.0635761	0.0811713	0.101062	0.133849	Genista scorpious			Chuvieco, E., Yebra, M., Jurdao, S., Aguado, I., Salas, F. J., García, M., Nieto, H., De Santis, A., Cocero, D., Riaño, D., Martínez, S., Zapico, E., Recondo, C., Martínez-Vega, J., Martín, M.P., Riva, J., Pérez, F. y Rodríguez-Silva, F. (2011): Field Fuel Moisture Measurements on Spanish study sites. Department of Geography, University of Alcalá, Spain. Version 1. Available online at: http://www…
C2_14_32	Chuvieco	AraPRE17	Aragon	Spain	42.2458	-0.339557		2001-07-26	2001	11	Tree cover, needleleaved, evergreen, closed to open (>15%)	77.1415	1	0.0635761	0.0811713	0.101062	0.133849	Quercus coccifera			Chuvieco, E., Yebra, M., Jurdao, S., Aguado, I., Salas, F. J., García, M., Nieto, H., De Santis, A., Cocero, D., Riaño, D., Martínez, S., Zapico, E., Recondo, C., Martínez-Vega, J., Martín, M.P., Riva, J., Pérez, F. y Rodríguez-Silva, F. (2011): Field Fuel Moisture Measurements on Spanish study sites. Department of Geography, University of Alcalá, Spain. Version 1. Available online at: http://www…
C2_14_33	Chuvieco	AraPRE17	Aragon	Spain	42.2458	-0.339557		2001-07-26	2001	11	Tree cover, needleleaved, evergreen, closed to open (>15%)	56.8996	1	0.0635761	0.0811713	0.101062	0.133849	Juniperus communis			Chuvieco, E., Yebra, M., Jurdao, S., Aguado, I., Salas, F. J., García, M., Nieto, H., De Santis, A., Cocero, D., Riaño, D., Martínez, S., Zapico, E., Recondo, C., Martínez-Vega, J., Martín, M.P., Riva, J., Pérez, F. y Rodríguez-Silva, F. (2011): Field Fuel Moisture Measurements on Spanish study sites. Department of Geography, University of Alcalá, Spain. Version 1. Available online at: http://www…
C2_14_34	Chuvieco	AraPRE17	Aragon	Spain	42.2458	-0.339557		2001-07-26	2001	11	Tree cover, needleleaved, evergreen, closed to open (>15%)	51.6295	1	0.0635761	0.0811713	0.101062	0.133849	Rosmarinus officinalis			Chuvieco, E., Yebra, M., Jurdao, S., Aguado, I., Salas, F. J., García, M., Nieto, H., De Santis, A., Cocero, D., Riaño, D., Martínez, S., Zapico, E., Recondo, C., Martínez-Vega, J., Martín, M.P., Riva, J., Pérez, F. y Rodríguez-Silva, F. (2011): Field Fuel Moisture Measurements on Spanish study sites. Department of Geography, University of Alcalá, Spain. Version 1. Available online at: http://www…
C2_14_35	Chuvieco	AraPRE17	Aragon	Spain	42.2458	-0.339557		2001-08-11	2001	11	Tree cover, needleleaved, evergreen, closed to open (>15%)	41.1077	1	0.0635761	0.0811713	0.101062	0.133849	Genista scorpious			Chuvieco, E., Yebra, M., Jurdao, S., Aguado, I., Salas, F. J., García, M., Nieto, H., De Santis, A., Cocero, D., Riaño, D., Martínez, S., Zapico, E., Recondo, C., Martínez-Vega, J., Martín, M.P., Riva, J., Pérez, F. y Rodríguez-Silva, F. (2011): Field Fuel Moisture Measurements on Spanish study sites. Department of Geography, University of Alcalá, Spain. Version 1. Available online at: http://www…
C2_14_36	Chuvieco	AraPRE17	Aragon	Spain	42.2458	-0.339557		2001-08-11	2001	11	Tree cover, needleleaved, evergreen, closed to open (>15%)	70.5973	1	0.0635761	0.0811713	0.101062	0.133849	Quercus coccifera			Chuvieco, E., Yebra, M., Jurdao, S., Aguado, I., Salas, F. J., García, M., Nieto, H., De Santis, A., Cocero, D., Riaño, D., Martínez, S., Zapico, E., Recondo, C., Martínez-Vega, J., Martín, M.P., Riva, J., Pérez, F. y Rodríguez-Silva, F. (2011): Field Fuel Moisture Measurements on Spanish study sites. Department of Geography, University of Alcalá, Spain. Version 1. Available online at: http://www…
C2_14_37	Chuvieco	AraPRE17	Aragon	Spain	42.2458	-0.339557		2001-08-11	2001	11	Tree cover, needleleaved, evergreen, closed to open (>15%)	72.1211	1	0.0635761	0.0811713	0.101062	0.133849	Juniperus communis			Chuvieco, E., Yebra, M., Jurdao, S., Aguado, I., Salas, F. J., García, M., Nieto, H., De Santis, A., Cocero, D., Riaño, D., Martínez, S., Zapico, E., Recondo, C., Martínez-Vega, J., Martín, M.P., Riva, J., Pérez, F. y Rodríguez-Silva, F. (2011): Field Fuel Moisture Measurements on Spanish study sites. Department of Geography, University of Alcalá, Spain. Version 1. Available online at: http://www…
C2_14_38	Chuvieco	AraPRE17	Aragon	Spain	42.2458	-0.339557		2001-08-11	2001	11	Tree cover, needleleaved, evergreen, closed to open (>15%)	71.1346	1	0.0635761	0.0811713	0.101062	0.133849	Rosmarinus officinalis			Chuvieco, E., Yebra, M., Jurdao, S., Aguado, I., Salas, F. J., García, M., Nieto, H., De Santis, A., Cocero, D., Riaño, D., Martínez, S., Zapico, E., Recondo, C., Martínez-Vega, J., Martín, M.P., Riva, J., Pérez, F. y Rodríguez-Silva, F. (2011): Field Fuel Moisture Measurements on Spanish study sites. Department of Geography, University of Alcalá, Spain. Version 1. Available online at: http://www…
C2_14_39	Chuvieco	AraPRE17	Aragon	Spain	42.2458	-0.339557		2001-08-27	2001	11	Tree cover, needleleaved, evergreen, closed to open (>15%)	35.4404	1	0.0635761	0.0811713	0.101062	0.133849	Genista scorpious			Chuvieco, E., Yebra, M., Jurdao, S., Aguado, I., Salas, F. J., García, M., Nieto, H., De Santis, A., Cocero, D., Riaño, D., Martínez, S., Zapico, E., Recondo, C., Martínez-Vega, J., Martín, M.P., Riva, J., Pérez, F. y Rodríguez-Silva, F. (2011): Field Fuel Moisture Measurements on Spanish study sites. Department of Geography, University of Alcalá, Spain. Version 1. Available online at: http://www…
C2_14_40	Chuvieco	AraPRE17	Aragon	Spain	42.2458	-0.339557		2001-08-27	2001	11	Tree cover, needleleaved, evergreen, closed to open (>15%)	75.6166	1	0.0635761	0.0811713	0.101062	0.133849	Quercus coccifera			Chuvieco, E., Yebra, M., Jurdao, S., Aguado, I., Salas, F. J., García, M., Nieto, H., De Santis, A., Cocero, D., Riaño, D., Martínez, S., Zapico, E., Recondo, C., Martínez-Vega, J., Martín, M.P., Riva, J., Pérez, F. y Rodríguez-Silva, F. (2011): Field Fuel Moisture Measurements on Spanish study sites. Department of Geography, University of Alcalá, Spain. Version 1. Available online at: http://www…
C2_14_41	Chuvieco	AraPRE17	Aragon	Spain	42.2458	-0.339557		2001-08-27	2001	11	Tree cover, needleleaved, evergreen, closed to open (>15%)	69.71	1	0.0635761	0.0811713	0.101062	0.133849	Juniperus communis			Chuvieco, E., Yebra, M., Jurdao, S., Aguado, I., Salas, F. J., García, M., Nieto, H., De Santis, A., Cocero, D., Riaño, D., Martínez, S., Zapico, E., Recondo, C., Martínez-Vega, J., Martín, M.P., Riva, J., Pérez, F. y Rodríguez-Silva, F. (2011): Field Fuel Moisture Measurements on Spanish study sites. Department of Geography, University of Alcalá, Spain. Version 1. Available online at: http://www…
C2_14_42	Chuvieco	AraPRE17	Aragon	Spain	42.2458	-0.339557		2001-08-27	2001	11	Tree cover, needleleaved, evergreen, closed to open (>15%)	47.4531	1	0.0635761	0.0811713	0.101062	0.133849	Rosmarinus officinalis			Chuvieco, E., Yebra, M., Jurdao, S., Aguado, I., Salas, F. J., García, M., Nieto, H., De Santis, A., Cocero, D., Riaño, D., Martínez, S., Zapico, E., Recondo, C., Martínez-Vega, J., Martín, M.P., Riva, J., Pérez, F. y Rodríguez-Silva, F. (2011): Field Fuel Moisture Measurements on Spanish study sites. Department of Geography, University of Alcalá, Spain. Version 1. Available online at: http://www…
C2_14_43	Chuvieco	AraPRE17	Aragon	Spain	42.2458	-0.339557		2001-09-12	2001	11	Tree cover, needleleaved, evergreen, closed to open (>15%)	37.4917	1	0.0635761	0.0811713	0.101062	0.133849	Genista scorpious			Chuvieco, E., Yebra, M., Jurdao, S., Aguado, I., Salas, F. J., García, M., Nieto, H., De Santis, A., Cocero, D., Riaño, D., Martínez, S., Zapico, E., Recondo, C., Martínez-Vega, J., Martín, M.P., Riva, J., Pérez, F. y Rodríguez-Silva, F. (2011): Field Fuel Moisture Measurements on Spanish study sites. Department of Geography, University of Alcalá, Spain. Version 1. Available online at: http://www…
C2_14_44	Chuvieco	AraPRE17	Aragon	Spain	42.2458	-0.339557		2001-09-12	2001	11	Tree cover, needleleaved, evergreen, closed to open (>15%)	74.7095	1	0.0635761	0.0811713	0.101062	0.133849	Quercus coccifera			Chuvieco, E., Yebra, M., Jurdao, S., Aguado, I., Salas, F. J., García, M., Nieto, H., De Santis, A., Cocero, D., Riaño, D., Martínez, S., Zapico, E., Recondo, C., Martínez-Vega, J., Martín, M.P., Riva, J., Pérez, F. y Rodríguez-Silva, F. (2011): Field Fuel Moisture Measurements on Spanish study sites. Department of Geography, University of Alcalá, Spain. Version 1. Available online at: http://www…
C2_14_45	Chuvieco	AraPRE17	Aragon	Spain	42.2458	-0.339557		2001-09-12	2001	11	Tree cover, needleleaved, evergreen, closed to open (>15%)	65.0189	1	0.0635761	0.0811713	0.101062	0.133849	Juniperus communis			Chuvieco, E., Yebra, M., Jurdao, S., Aguado, I., Salas, F. J., García, M., Nieto, H., De Santis, A., Cocero, D., Riaño, D., Martínez, S., Zapico, E., Recondo, C., Martínez-Vega, J., Martín, M.P., Riva, J., Pérez, F. y Rodríguez-Silva, F. (2011): Field Fuel Moisture Measurements on Spanish study sites. Department of Geography, University of Alcalá, Spain. Version 1. Available online at: http://www…
C2_14_46	Chuvieco	AraPRE17	Aragon	Spain	42.2458	-0.339557		2001-09-12	2001	11	Tree cover, needleleaved, evergreen, closed to open (>15%)	55.0743	1	0.0635761	0.0811713	0.101062	0.133849	Rosmarinus officinalis			Chuvieco, E., Yebra, M., Jurdao, S., Aguado, I., Salas, F. J., García, M., Nieto, H., De Santis, A., Cocero, D., Riaño, D., Martínez, S., Zapico, E., Recondo, C., Martínez-Vega, J., Martín, M.P., Riva, J., Pérez, F. y Rodríguez-Silva, F. (2011): Field Fuel Moisture Measurements on Spanish study sites. Department of Geography, University of Alcalá, Spain. Version 1. Available online at: http://www…
C2_14_47	Chuvieco	AraPRE17	Aragon	Spain	42.2458	-0.339557		2002-04-08	2002	11	Tree cover, needleleaved, evergreen, closed to open (>15%)	146.619	1	0.0635761	0.0811713	0.101062	0.133849	Rosmarinus officinalis			Chuvieco, E., Yebra, M., Jurdao, S., Aguado, I., Salas, F. J., García, M., Nieto, H., De Santis, A., Cocero, D., Riaño, D., Martínez, S., Zapico, E., Recondo, C., Martínez-Vega, J., Martín, M.P., Riva, J., Pérez, F. y Rodríguez-Silva, F. (2011): Field Fuel Moisture Measurements on Spanish study sites. Department of Geography, University of Alcalá, Spain. Version 1. Available online at: http://www…
C2_14_48	Chuvieco	AraPRE17	Aragon	Spain	42.2458	-0.339557		2002-04-08	2002	11	Tree cover, needleleaved, evergreen, closed to open (>15%)	65.7124	1	0.0635761	0.0811713	0.101062	0.133849	Genista scorpious			Chuvieco, E., Yebra, M., Jurdao, S., Aguado, I., Salas, F. J., García, M., Nieto, H., De Santis, A., Cocero, D., Riaño, D., Martínez, S., Zapico, E., Recondo, C., Martínez-Vega, J., Martín, M.P., Riva, J., Pérez, F. y Rodríguez-Silva, F. (2011): Field Fuel Moisture Measurements on Spanish study sites. Department of Geography, University of Alcalá, Spain. Version 1. Available online at: http://www…
C2_14_49	Chuvieco	AraPRE17	Aragon	Spain	42.2458	-0.339557		2002-04-24	2002	11	Tree cover, needleleaved, evergreen, closed to open (>15%)	58.5213	1	0.0635761	0.0811713	0.101062	0.133849	Genista scorpious			Chuvieco, E., Yebra, M., Jurdao, S., Aguado, I., Salas, F. J., García, M., Nieto, H., De Santis, A., Cocero, D., Riaño, D., Martínez, S., Zapico, E., Recondo, C., Martínez-Vega, J., Martín, M.P., Riva, J., Pérez, F. y Rodríguez-Silva, F. (2011): Field Fuel Moisture Measurements on Spanish study sites. Department of Geography, University of Alcalá, Spain. Version 1. Available online at: http://www…
[truncated: 161,017 more rows]

## Sheet: Protocol
Protocol code	Time range for sampling	New and old leaves combined	Weighing procedure	Weighing device accuracy (g)	Material for transportation	Drying device	Drying time (h)	Drying temperature (°C)	OBSERVATIONS
1	na	Yes	2	0.0001	Plastic bottle	1	24	100
2	na	No	2	0.01	Hermetic closing plastic bags	1	48	70
[truncated: 21 more rows]
